# Supplementary material for: Palladium-catalyzed three-component domino reaction for the preparation of benzo[b]thiophene and related compounds
Source: Royal Society of Chemistry journal article supplement (doi:10.1039/c1ob05571b), 2011-01-01
Supplement: c1ob05571b.pdf [file c1ob05571b.pdf]

# **Palladium-Catalyzed Three-Component Domino Reaction for the Preparation of Benzo[*b*]thiophene and Related Compounds**

**Huanan Huang, Jing Li, Weining Zhao, Yanbo Mei, Zheng Duan\***

*Chemistry Department, the Key Lab of Chemical Biology and Organic Chemistry of Henan  
Province, Zhengzhou University, Zhengzhou 450001, P. R. China.  
Fax: 86 371 67783391; Tel: 86 371 67783391; E-mail: duanzheng@zzu.edu.cn*

## **Supporting Information**

Table of Contents

|                                               |       |
|-----------------------------------------------|-------|
| Experimental Procedures and Spectra Data..... | 2-10  |
| <sup>1</sup> H NMR, <sup>13</sup> C NMR ..... | 11-38 |
| UV spectra.....                               | 41-52 |

## General Information

All reagents were used as received and used directly without further purification. Silica gel (200-300 mesh) for purification and silica gel TLC (F254) were purchased from Qing Dao Hai Yang Chemical Industry Co. of China. <sup>1</sup>H NMR and <sup>13</sup>C NMR spectra were recorded on a Bruker DPX-300 spectrometer. Mass spectra were obtained on a Waters Q-ToF MicroTM spectrometer. Element analytic data were obtained on a Thermo Electron Corporation flash EA 1112 element spectrometer. Melting points (uncorrected) were obtained on a X-4 micro-melting point apparatus. IR spectra were recorded on a Thermo Nicolet IR 200 spectrometer. Ultraviolet data were recorded in a Varian Cary 100 UV-visible spectrophotometer at room temperature in diluted dichloromethane solution (*ca.* 10<sup>-5</sup> mol L<sup>-1</sup>).

### **Reaction procedure :**

General procedure: a reaction vessel was charged with 3 mmol diphenylacetylene, 10 mol% Pd(OAc)<sub>2</sub>, 20 mol % Cy<sub>3</sub>P, 2 mmol Na<sub>2</sub>CO<sub>3</sub>, 0.7 mmol LiBr in 5 mL DMF under N<sub>2</sub>. Then 1mmol 3-bromothiophene was added to the vessel. The mixture was stirred at 120 °C for 20 hours. The suspension was cooled down to r.t., diluted with 20 mL EtOAc and washed with 60 mL H<sub>2</sub>O. The aqueous layer was extracted twice with EtOAc (10 mL) and the combined organic layers were dried over Na<sub>2</sub>SO<sub>4</sub>. After evaporation of the solvents the residue

was subjected to silica gel chromatography or thin layer chromatography (TLC) (hexane).

### 3aa: 4,5,6,7-Tetraphenylbenzo[*b*]thiophene

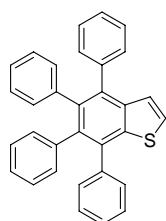

Yield: 82%. Purple solid. m.p.: 206-207 °C. <sup>1</sup>H NMR (300 MHz, CDCl<sub>3</sub>): 6.82~6.90 (m, 10H), 7.15~7.32 (m, 11H), 7.36 (d, *J*=5.7Hz, 1H). <sup>13</sup>C NMR (75MHz, CDCl<sub>3</sub>): 124.68(CH), 125.44(CH), 125.55(CH), 126.50(CH), 126.73(CH), 126.76(CH), 127.13(CH), 127.16(CH), 127.61(CH), 128.02(CH), 129.99(CH), 130.64(CH), 131.70(CH), 131.73(CH), 135.02, 135.97, 137.00, 137.78, 138.47, 139.93, 139.99, 140.12, 140.21, 140.65. IR (KBr): 3056, 3022, 1600, 1503, 1490, 1441, 1415, 1279, 1109, 1072, 1026, 914, 835, 735, 699, 660, 587, 555, 543 cm<sup>-1</sup>. HRMS *m/z* (M<sup>+</sup>+H) Calcd for C<sub>32</sub>H<sub>22</sub>S: 439.1521, Found: 439.1518.

### 3ab: 4,5,6,7-Tetrap-tolylbenzo[*b*]thiophene

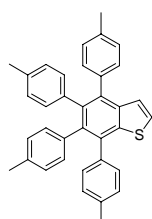

Yield: 54%. Purple solid. m.p.: 230-231 °C. <sup>1</sup>H NMR (300 MHz, CDCl<sub>3</sub>): 2.10 (s, 6H,CH<sub>3</sub>), 2.29 (s, 6H,CH<sub>3</sub>), 6.66~6.73 (m, 8H), 6.99~7.18 (m, 9H), 7.30 (d, *J*=5.7Hz, 1H). <sup>13</sup>C NMR (75MHz, CDCl<sub>3</sub>): 21.15(CH<sub>3</sub>), 21.27(CH<sub>3</sub>), 21.36(CH<sub>3</sub>), 124.83(CH), 126.65(CH), 127.45(CH), 127.47(CH), 128.29(CH), 128.73(CH), 129.80(CH), 130.50(CH), 131.52(CH), 131.54(CH), 134.47, 134.59, 134.90, 135.72, 135.90, 136.43, 137.11, 137.25, 137.30, 137.55, 137.89, 138.46, 140.67. IR (KBr): 3021, 2920, 1890, 1611, 1516, 1448, 1421, 1373, 1182, 111

1, 1020, 819, 738, 665, 543  $\text{cm}^{-1}$ . HMRS  $m/z(M^+ + Na)$  Calcd for  $\text{C}_{36}\text{H}_{30}\text{S}$ :  
517.1965, found: 517.1962.

### 3ac: 4,5,6,7-Tetrakis(4-methoxyphenyl)benzo[*b*]thiophene

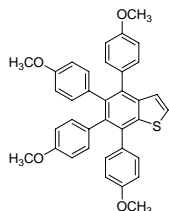

Yield: 61%. White solid. m.p.: 259-261 °C.  $^1\text{H}$  NMR (300M  
Hz,  $\text{CDCl}_3$ ): 3.53 (s, 6H, CH<sub>3</sub>), 3.66~3.67 (d, 6H, CH<sub>3</sub>), 6.35  
~6.37 (m, 3H), 6.61~6.70(m, 9H), 6.99~7.14 (m, 5H), 7.23 (

d,  $J=5.7\text{Hz}$ , 1H).  $^{13}\text{C}$  NMR (75MHz,  $\text{CDCl}_3$ ): 54.91(CH<sub>3</sub>), 55.09(CH<sub>3</sub>), 5  
5.12(CH<sub>3</sub>), 112.34(CH), 113.07(CH), 113.44(CH), 124.81(CH), 126.68(C  
H), 131.10(CH), 131.69(CH), 132.65, 132.69(CH), 132.89, 132.91, 134.6  
7, 135.66, 137.04, 137.80, 138.59, 140.84, 157.04, 157.12, 157.95, 158.3  
2. IR (KBr): 2996, 2931, 2834, 2361, 1608, 1514, 1461, 1423, 1373, 128  
7, 1245, 1177, 1033, 833, 806, 766, 551  $\text{cm}^{-1}$ . HMRS  $m/z (M^+ + Na)$  Calcd for  $\text{C}_3$   
 $\text{H}_{30}\text{O}_4\text{S}$ : 587.1762, found: 581.1766.

### 3ad: 4,5,6,7-Tetrakis(4-fluorophenyl)benzo[*b*]thiophene

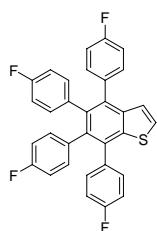

Yield: 73%. White solid. m.p.: 232-233 °C.  $^1\text{H}$  NMR (300M  
Hz,  $\text{CDCl}_3$ ): 6.61~6.79 (m, 8H), 6.91~6.99 (m, 4H), 7.12~7.2  
6 (m, 5H), 7.42 (d,  $J=5.4\text{Hz}$ , 1H).  $^{13}\text{C}$  NMR (75MHz,  $\text{CDCl}_3$ )

: 114.01( $J_{\text{C-F}}=2.6\text{Hz}$ , CH), 114.3( $J_{\text{C-F}}=2.7\text{Hz}$ , CH), 114.86( $J_{\text{C-F}}$   
 $=21.2\text{Hz}$ , CH), 115.3( $J_{\text{C-F}}=21.4\text{Hz}$ , CH), 124.44(CH), 127.74(CH), 131.5(  
 $J_{\text{C-F}}=8\text{Hz}$ , CH), 132.0( $J_{\text{C-F}}=8\text{Hz}$ , CH), 132.94( $J_{\text{C-F}}=7.9\text{Hz}$ , CH), 134.38, 13  
5.28, 135.5( $J_{\text{C-F}}=3.5\text{Hz}$ , 2C), 135.7( $J_{\text{C-F}}=3.1\text{Hz}$ ), 135.71( $J_{\text{C-F}}=4.1\text{Hz}$ ), 13

6.12, 136.95, 138.68, 140.92, 160.8( $J_{C-F}=244\text{Hz,CF}$ ), 160.9( $J_{C-F}=244\text{Hz,CF}$ ), 161.6( $J_{C-F}=245\text{Hz,CF}$ ), 161.9( $J_{C-F}=245\text{Hz,CF}$ ). HMRS  $m/z(M^+ + H)$   
IR (KBr): 3072, 1886, 1687, 1603, 1514, 1454, 1426, 1399, 1326, 1297, 1227, 1156, 1095, 1014, 934, 856, 838, 816, 765, 740, 708, 667, 542, 533, 515  $\text{cm}^{-1}$ . Calcd for  $\text{C}_{32}\text{H}_{18}\text{F}_4\text{S}$ : 511.1144, found: 511.1106. Anal. Calc d. For  $\text{C}_{32}\text{H}_{18}\text{F}_4\text{S}$ : C, 75.28; H, 3.55. Found: C, 74.84; H, 3.44.

### 3ca: 2-Methyl-4,5,6,7-tetraphenylbenzo[*b*]thiophene

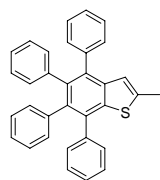

Yield: 71%. Purple solid. m.p.: 190-191 °C.  $^1\text{H}$  NMR (300 MHz,  $\text{CDCl}_3$ ): 2.35 (s, 3H,  $\text{CH}_3$ ), 6.70~6.76 (m, 11H), 7.04~7.20 (m, 10H),  $^{13}\text{C}$  NMR (75MHz,  $\text{CDCl}_3$ ): 16.24( $\text{CH}_3$ ), 122.26(CH), 125.39(CH), 125.48(CH), 126.41(CH), 126.72(CH), 126.75(CH), 127.07(CH), 127.61(CH), 127.99(CH), 129.98(CH), 130.67(CH), 131.80(2CH), 134.66, 135.05, 136.16, 137.69, 139.22, 140.09, 140.29, 140.31, 140.39, 140.42, 141.76. IR (KBr): 3055, 3024, 2916, 1600, 1496, 1442, 1418, 1375, 1128, 1073, 1027, 758, 702, 574, 543  $\text{cm}^{-1}$ . HMRS  $m/z(M^+ + \text{Na})$  Calcd for  $\text{C}_{33}\text{H}_{24}\text{S}$ : 475.1496, found: 475.1495.

### 3cc: 2-Methyl -4,5,6,7-tetrakis(4-methoxyphenyl)benzo[*b*]thiophene

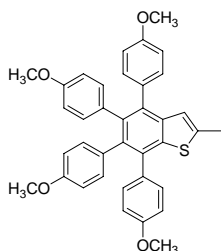

Yield: 57%. White solid. m.p.: 200-203 °C.  $^1\text{H}$  NMR (300 MHz,  $\text{CDCl}_3$ ): 2.46(s, 3H,  $\text{CH}_3$ ), 3.62 (s, 6H,  $\text{OCH}_3$ ), 3.76 (s, 6H,  $\text{OCH}_3$ ), 6.42~6.46 (m, 4H), 6.70~6.78(m, 9H), 7.

08 (d,  $J=8.7\text{Hz}$ , 2H), 7.18 (d,  $J=8.7\text{Hz}$ , 2H).  $^{13}\text{C}$  NMR (75MHz,  $\text{CDCl}_3$ ): 16.16( $\text{CH}_3$ ), 54.91( $\text{OCH}_3$ ), 55.08( $\text{OCH}_3$ ), 55.10( $\text{OCH}_3$ ), 112.26(CH), 112.29(CH), 113.01(CH), 113.37(CH), 122.36(CH), 131.03(CH), 131.65(CH), 132.69(CH), 132.71(CH), 132.78, 132.88, 133.03, 133.04, 134.24, 134.69, 136.14, 137.65, 139.27, 140.51, 141.15, 156.97, 157.04, 157.85, 158.26. IR (KBr): 2924, 2835, 1608, 1514, 1461, 1378, 1286, 1245, 1175, 1107, 1032, 833, 768, 620,  $551\text{ cm}^{-1}$ . HMRS  $m/z$  ( $\text{M}^+ + \text{Na}$ ) Calcd for  $\text{C}_{37}\text{H}_{32}\text{O}_4$ : 595.1918, found: 595.1923.

### 3da: 3-Methyl 4,5,6,7-tetrakis(4-methoxyphenyl) benzo[*b*]thiophene

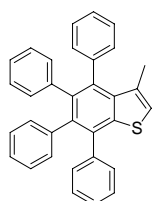

Yield: 64%. Purple solid. m.p.: 251-252 °C.  $^1\text{H}$  NMR (300MHz,  $\text{CDCl}_3$ ): 1.80(s, 3H,  $\text{CH}_3$ ), 6.92~6.94 (m, 10H), 7.09 (d,  $J=0.9\text{Hz}$ , 1H), 7.21~7.34 (m, 8H), 7.39~7.42 (m, 2H).  $^{13}\text{C}$  NMR (75MHz,  $\text{CDCl}_3$ ): 17.78( $\text{CH}_3$ ), 124.35(CH), 125.30(CH), 125.52(CH), 126.50(CH), 126.60(CH), 126.72(CH), 126.87(CH), 127.15(CH), 128.01(CH), 130.16(CH), 131.24(CH), 131.59(CH), 131.63(CH), 134.43, 135.39, 136.01, 136.58, 136.65, 138.90, 139.90, 140.04, 140.11, 140.20, 142.09. IR (KBr): 3055, 3024, 2960, 2920, 2851, 1600, 1497, 1442, 1369, 1277, 1144, 1063, 1024, 913, 851, 771, 732, 698, 590,  $557\text{ cm}^{-1}$ . HMRS  $m/z$  ( $\text{M}^+ + \text{H}$ ) Calcd for  $\text{C}_{33}\text{H}_{24}\text{S}$ : 453.1678, found: 453.1669.

### 3ea: 1, 2, 3, 4-Tetraphenyldibenzothiophene

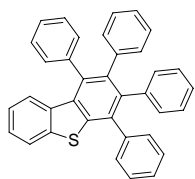

Yield: 52%. Purple solid. m.p.: 215-217 °C  $^1\text{H}$  NMR (300 MHz,  $\text{CDCl}_3$ ): 6.62 (d,  $J=8.1\text{Hz}$ , 1H), 6.84~6.90 (m, 10H), 6.97~7.03 (m, 2H), 7.23~7.34 (m, 10H), 7.36 (d,  $J=1.8\text{Hz}$ , 1H).  $^{13}\text{C}$  NMR (75MHz,  $\text{CDCl}_3$ ): 122.30(CH), 123.76(CH), 125.14(CH), 125.40(CH), 125.62(CH), 125.97(CH), 126.54(CH), 126.72(CH), 127.05(CH), 127.26(CH), 128.07(CH), 128.27(CH), 130.06(CH), 130.23(CH), 131.37(CH), 131.53(CH), 132.46, 135.18, 136.28, 137.35, 138.76, 139.00, 139.71, 139.74, 139.90, 140.11, 140.45. IR (KBr): 3055, 2921, 2362, 1633, 1441, 1382, 1071, 1028, 734, 699, 569  $\text{cm}^{-1}$ . HMRS  $m/z$  ( $\text{M}^+\text{+Na}$ ) Calcd for  $\text{C}_{36}\text{H}_{24}\text{S}$ : 511.1496, found: 511.1494.

### 3fa: 4,5,6,7-Tetraphenylbenzo[*b*]thiophene-2-carbaldehyde

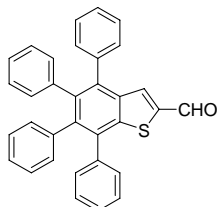

Yield: 47%. yellow solid. m.p.: 269-270 °C  $^1\text{H}$  NMR (300 MHz,  $\text{CDCl}_3$ ): 6.73~6.82 (m, 10H), 7.10~7.19 (m, 10H), 7.73 (s, 1H), 9.83 (s, 1H, CHO),  $^{13}\text{C}$  NMR (75MHz,  $\text{CDCl}_3$ ): 125.83(CH), 126.01(CH), 126.94(CH), 127.09(CH), 127.57(CH), 127.89(CH), 128.27(CH), 129.80(CH), 130.47(CH), 131.28(CH), 131.50(CH), 135.37(CH), 135.77, 137.81, 138.50, 138.92, 138.95, 139.10, 139.27, 139.31, 140.89, 143.54, 143.86, 184.75(CH=O). IR (KBr): 3053, 3023, 2809, 1670, 1599, 1546, 1486, 1422, 1344, 1245, 1177, 1144, 1106, 856, 779, 740, 699, 655, 568  $\text{cm}^{-1}$ . HMRS  $m/z$  ( $\text{M}^+\text{+Na}$ ) Calcd for  $\text{C}_{33}\text{H}_{22}\text{OS}$ : 489.1288, found: 489.1250. Anal. Calcd. For  $\text{C}_{33}\text{H}_{22}\text{OS}$ : C, 84.95;

H, 4.75. Found: C, 84.79; H, 4.83.

### 3ga: 4,5,6,7-Tetraphenylbenzo[*b*]thiophene-2-carbonitrile

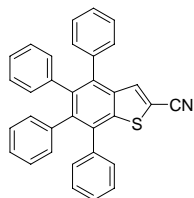

Yield: 43%. Yellow solid. m.p.: 298-299 °C.  $^1\text{H}$  NMR (300 MHz,  $\text{CDCl}_3$ ): 6.80~6.91 (m, 10H), 7.14~7.23 (m, 10H), 7.69 (s, 1H).  $^{13}\text{C}$  NMR (75MHz,  $\text{CDCl}_3$ ): 110.10(CN), 114.60, 125.91(CH), 126.09(CH), 126.96(CH), 126.98(CH), 127.21(CH), 127.80(CH), 127.94(CH), 128.41(CH), 129.59(CH), 130.35(CH), 131.24(CH), 131.42(CH), 135.02, 136.09(CH), 136.71, 137.60, 138.63, 138.94, 139.02, 139.07, 139.37, 140.55, 142.64. R (KBr): 3026, 2215, 1598, 1485, 1443, 1417, 1230, 1101, 1073, 1026, 882, 777, 761, 735, 713, 698, 572, 556,  $535\text{cm}^{-1}$ . HMRS  $m/z(\text{M}^+ + \text{Na})$  Calcd for  $\text{C}_{33}\text{H}_{21}\text{NS}$ : 486.1293, found: 486.1254. Anal. Calcd. For  $\text{C}_{33}\text{H}_{21}\text{NS}$ : C, 85.50; H, 4.57; N, 3.02; Found: C, 84.98; H, 4.41; N, 2.70.

### 5aa: 1-Methyl-4,5,6,7-tetraphenyl-1*H*-indole

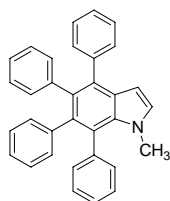

Yield: 66%. White solid. m.p.: 189-190 °C.  $^1\text{H}$  NMR (300MHz,  $\text{CDCl}_3$ ): 3.17 (s, 3H,  $\text{CH}_3$ ), 6.38~6.39 (m, 1H), 6.83~6.84 (m, 10H), 6.98(d,  $J=3\text{Hz}$ , 1H), 7.14~7.25 (m, 10H).  $^{13}\text{C}$  NMR (75MHz,  $\text{CDCl}_3$ ): 36.62( $\text{CH}_3$ ), 100.98(CH), 124.88(CH), 124.92(CH), 125.96(CH), 126.26(CH), 126.44(CH), 126.63(CH), 126.95(CH), 127.39(CH), 128.42, 130.75(CH), 131.71(CH), 131.88(CH), 132.17(CH), 132.76, 1



33.38, 136.24, 138.57, 140.18, 140.72, 140.98. IR (KBr): 3055, 3019, 1600, 1518, 1494, 1469, 1440, 1425, 1391, 1374, 1334, 1069, 1027, 761, 744, 733, 694, 594, 574 $\text{cm}^{-1}$ . HRMS  $m/z(M^+ + H)$  Calcd for  $\text{C}_{33}\text{H}_{25}\text{N}$ : 436.2066, Found: 436.2060.

### 5ba: 1-Benzyl-4,5,6,7-tetraphenyl-1H-indole

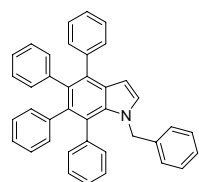

Yield: 53%. White solid. m.p.: 231-232 °C.  $^1\text{H}$  NMR (300MHz,  $\text{CDCl}_3$ ): 4.73 (s, 2H,  $\text{CH}_2$ ), 6.48 (d,  $J=3\text{Hz}$ , 1H), 6.60~6.63 (m, 2H), 6.71~6.87 (m, 10H), 6.91~7.01 (m, 6H), 7.11~7.21 (m, 6H), 7.28~7.31 (m, 2H).  $^{13}\text{C}$  NMR (75MHz,  $\text{CDCl}_3$ ): 51.62( $\text{CH}_2$ ), 102.27 (CH), 124.98(CH), 125.00(CH), 125.15, 126.12(CH), 126.22(CH), 126.31(CH), 126.58(CH), 126.65(CH), 127.05(CH), 127.13(CH), 127.54(CH), 128.32 (CH), 128.84, 130.93(CH), 131.24(CH), 131.42(CH), 131.94(CH), 132.26(CH), 132.47, 132.93, 133.10, 136.73, 138.27, 138.93, 140.30, 140.85, 141.09. IR (KBr): 3056, 3022, 1600, 1519, 1494, 1453, 1440, 1380, 1328, 1240, 1155, 1070, 1028, 760, 744, 704, 697, 593 $\text{cm}^{-1}$ . HRMS  $m/z(M^+ + H)$  Calcd for  $\text{C}_{39}\text{H}_{29}\text{N}$ : 512.2379, Found: 512.2374.

### 5ab: 1-Methyl-4,5,6,7-tetrap-tolyl-1H-indole

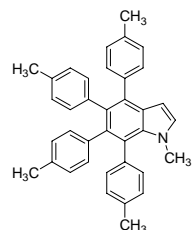

Yield: 47%. White solid. m.p.: 232-233 °C.  $^1\text{H}$  NMR (300MHz,  $\text{CDCl}_3$ ): 2.08(s, 3H,  $\text{CH}_3$ ), 2.10(s, 3H,  $\text{CH}_3$ ), 2.28(s, 3H,  $\text{CH}_3$ ), 2.29 (s, 3H,  $\text{CH}_3$ ), 3.13 (s, 3H,  $\text{NCH}_3$ ), 6.34 (d,  $J=3.3\text{Hz}$ , 1H), 6

.61~6.73 (m, 8H), 6.92~7.01 (m, 5H), 7.10~7.15 (m, 4H).  $^{13}\text{C}$  NMR (75MHz,  $\text{CDCl}_3$ ): 21.08( $\text{CH}_3$ ), 21.24( $\text{CH}_3$ ), 21.26( $\text{CH}_3$ ), 36.60( $\text{NCH}_3$ ), 100.98(CH), 124.93, 126.96(CH), 127.18(CH), 127.63(CH), 128.11(CH), 128.40, 130.62(CH), 131.43(CH), 131.55(CH), 131.66(CH), 131.96(CH), 132.25, 132.61, 133.57, 133.81, 133.83, 135.11, 135.68, 135.89, 136.44, 137.43, 137.89, 138.15. IR (KBr): 3018, 2921, 2861, 1897, 1525, 1513, 1452, 1429, 1372, 1331, 1263, 1210, 1180, 1110, 1091, 1019, 854, 818, 803, 771, 750, 736, 697, 676, 543,  $530\text{cm}^{-1}$ . HRMS  $m/z(\text{M}^++\text{H})$  Calcd for  $\text{C}_{37}\text{H}_{33}\text{N}$ : 492.2692, Found: 492.268.

#### 5ac: 1-Methyl-4,5,6,7-tetrakis(4-methoxyphenyl)-1H-indole

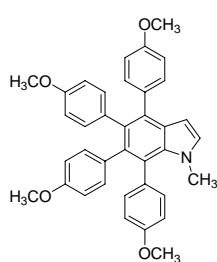

Yield: 47%. Yellow solid. m.p.: 253-254 °C.  $^1\text{H}$  NMR (300 MHz,  $\text{CDCl}_3$ ): 3.16 (s, 3H,  $\text{NCH}_3$ ), 3.61 (s, 3H,  $\text{OCH}_3$ ), 3.63 (s, 3H,  $\text{OCH}_3$ ), 3.76 (s, 3H,  $\text{OCH}_3$ ), 3.77 (s, 3H,  $\text{OCH}_3$ ), 6.35~6.44 (m, 5H), 6.70~6.77 (m, 8H), 6.94 (d,  $J=3\text{Hz}$ , 1H), 7.12~7.18 (m, 4H).  $^{13}\text{C}$  NMR (75MHz,  $\text{CDCl}_3$ ): 36.69( $\text{NCH}_3$ ), 54.87( $\text{OCH}_3$ ), 54.89( $\text{OCH}_3$ ), 55.08( $\text{OCH}_3$ ), 100.93(CH), 111.85(CH), 112.06(CH), 112.40(CH), 112.88(CH), 124.71, 128.48, 131.02, 131.50(CH), 131.78(CH), 132.14, 132.41, 132.61(CH), 132.71(CH), 132.82, 133.04(CH), 133.53, 133.73, 133.77, 136.49, 156.60, 156.64, 157.56, 158.09. IR (KBr): 2930, 2834, 1609, 1574, 1514, 1458, 1429, 1393, 1373, 1333, 1285, 1244, 1176, 1106, 1035, 832, 808, 776, 740,  $588, 552\text{cm}^{-1}$ . HRMS  $m/z(\text{M}^++\text{H})$  Calcd for  $\text{C}_{37}\text{H}_{33}\text{NO}_4$ : 556.2488, Found: 556.2484.

huanghn318p3

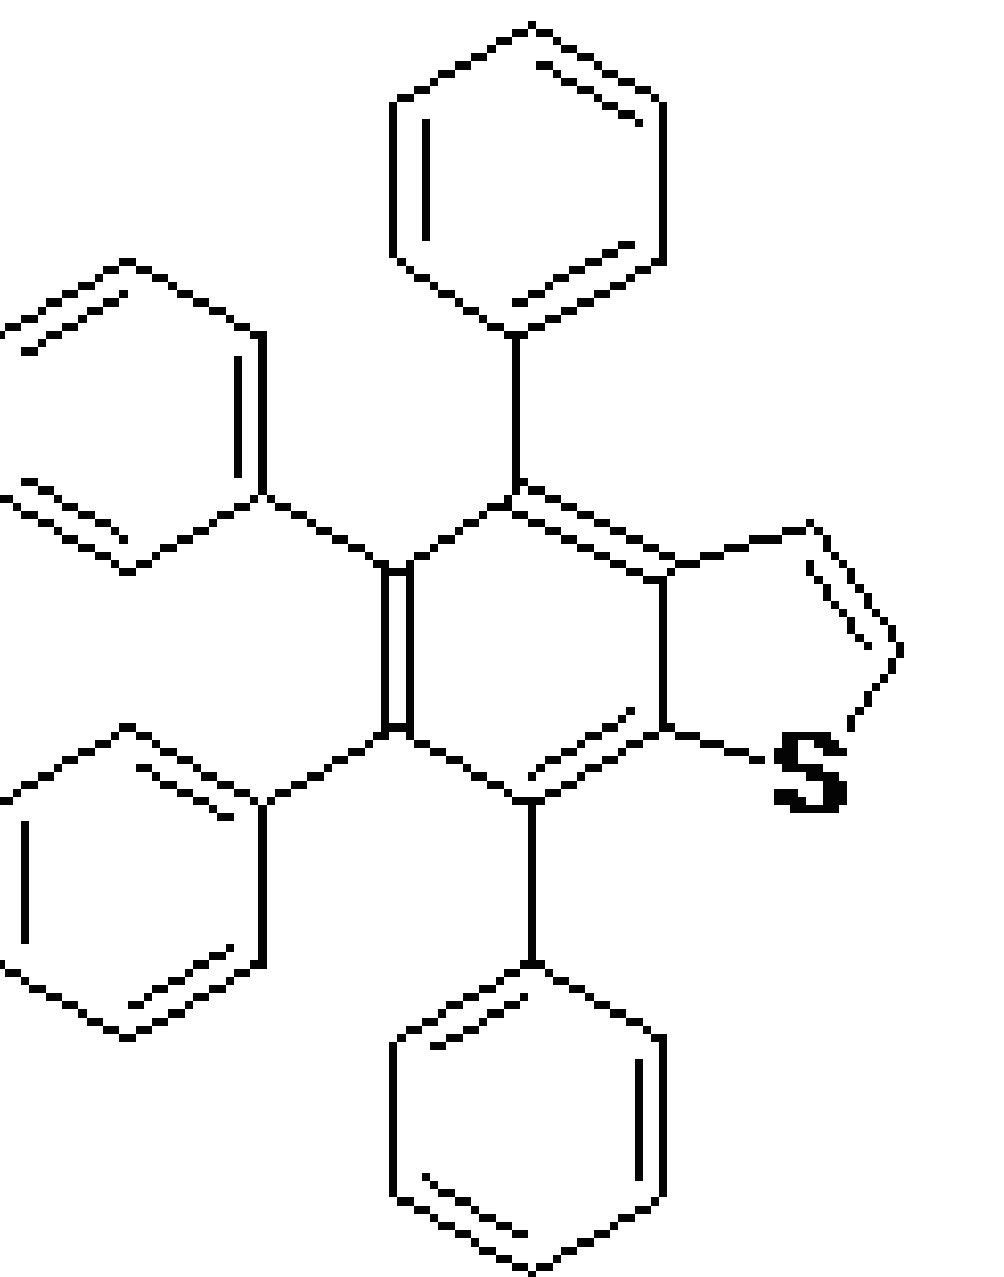

**3aa**

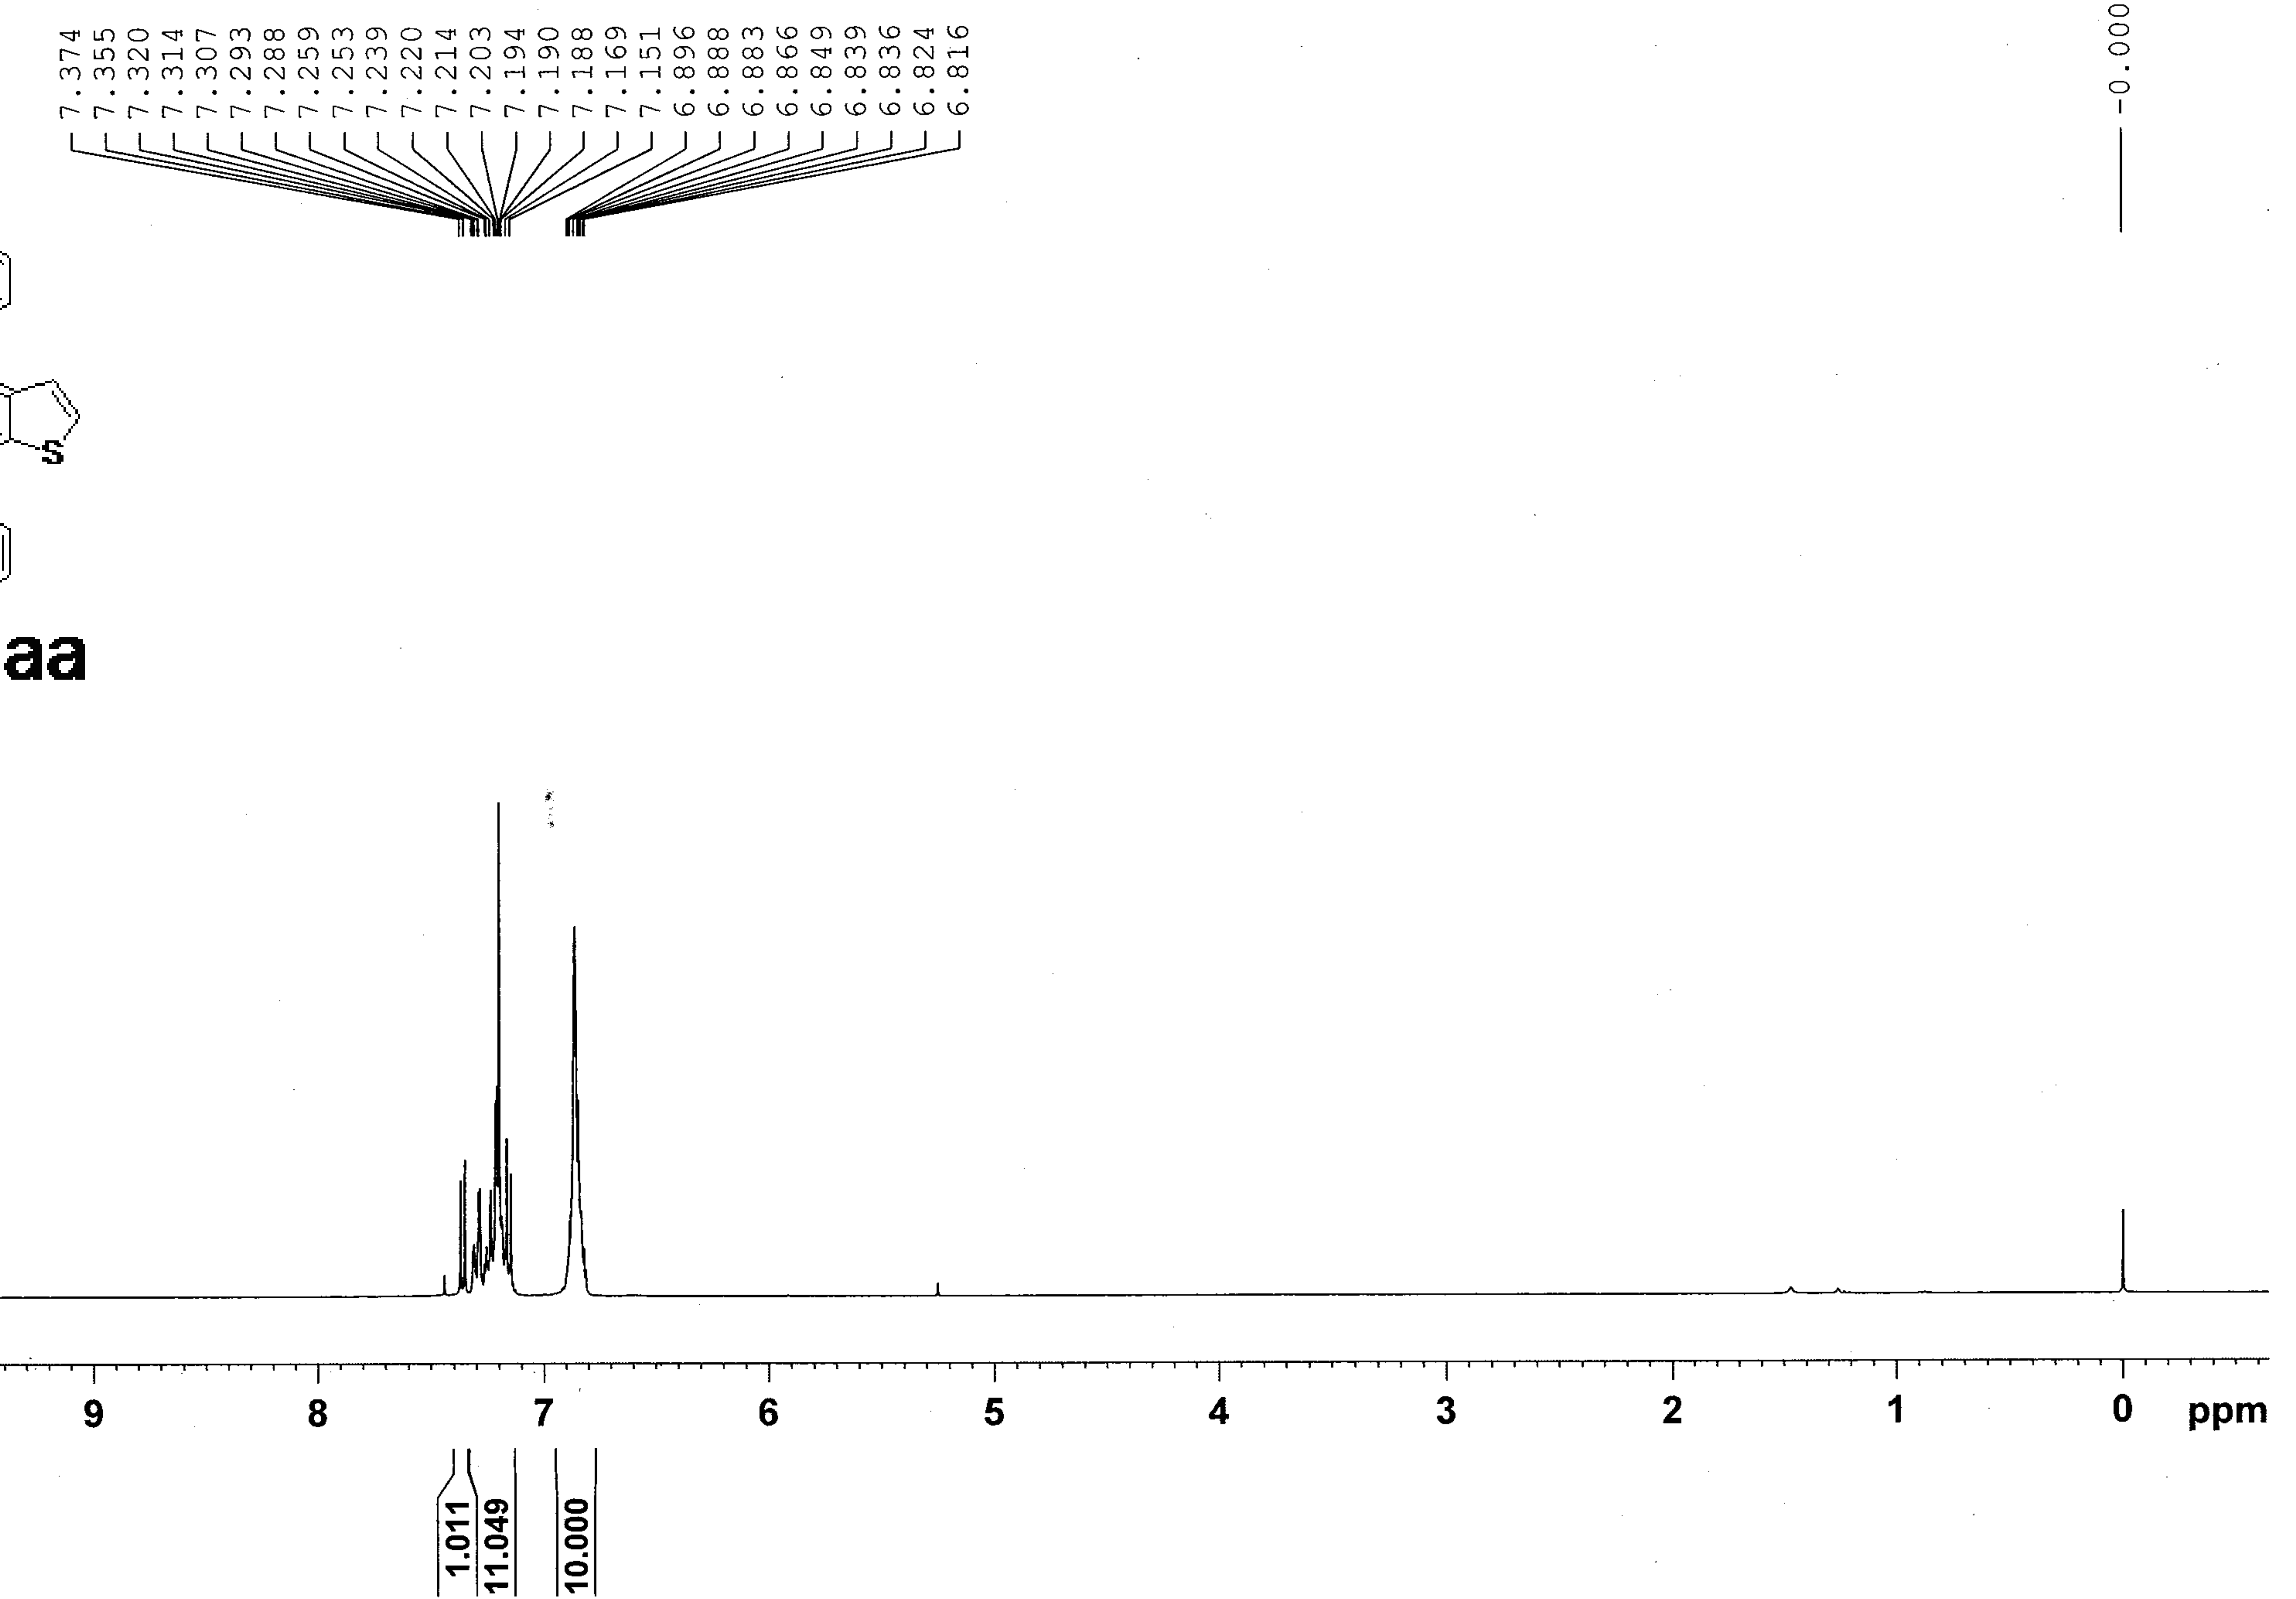

huanghn318p3 C13CPD

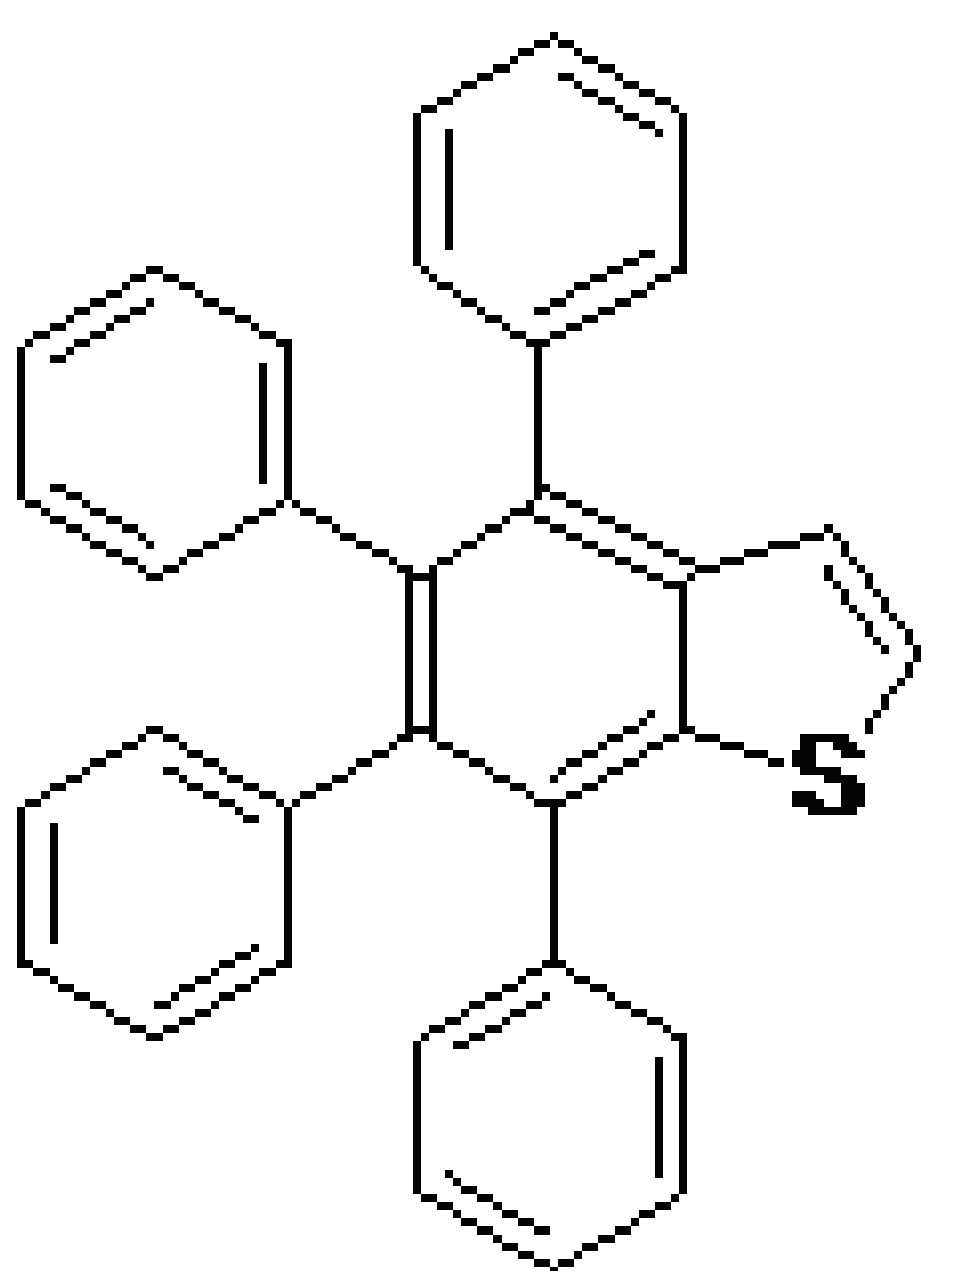

**3aa**

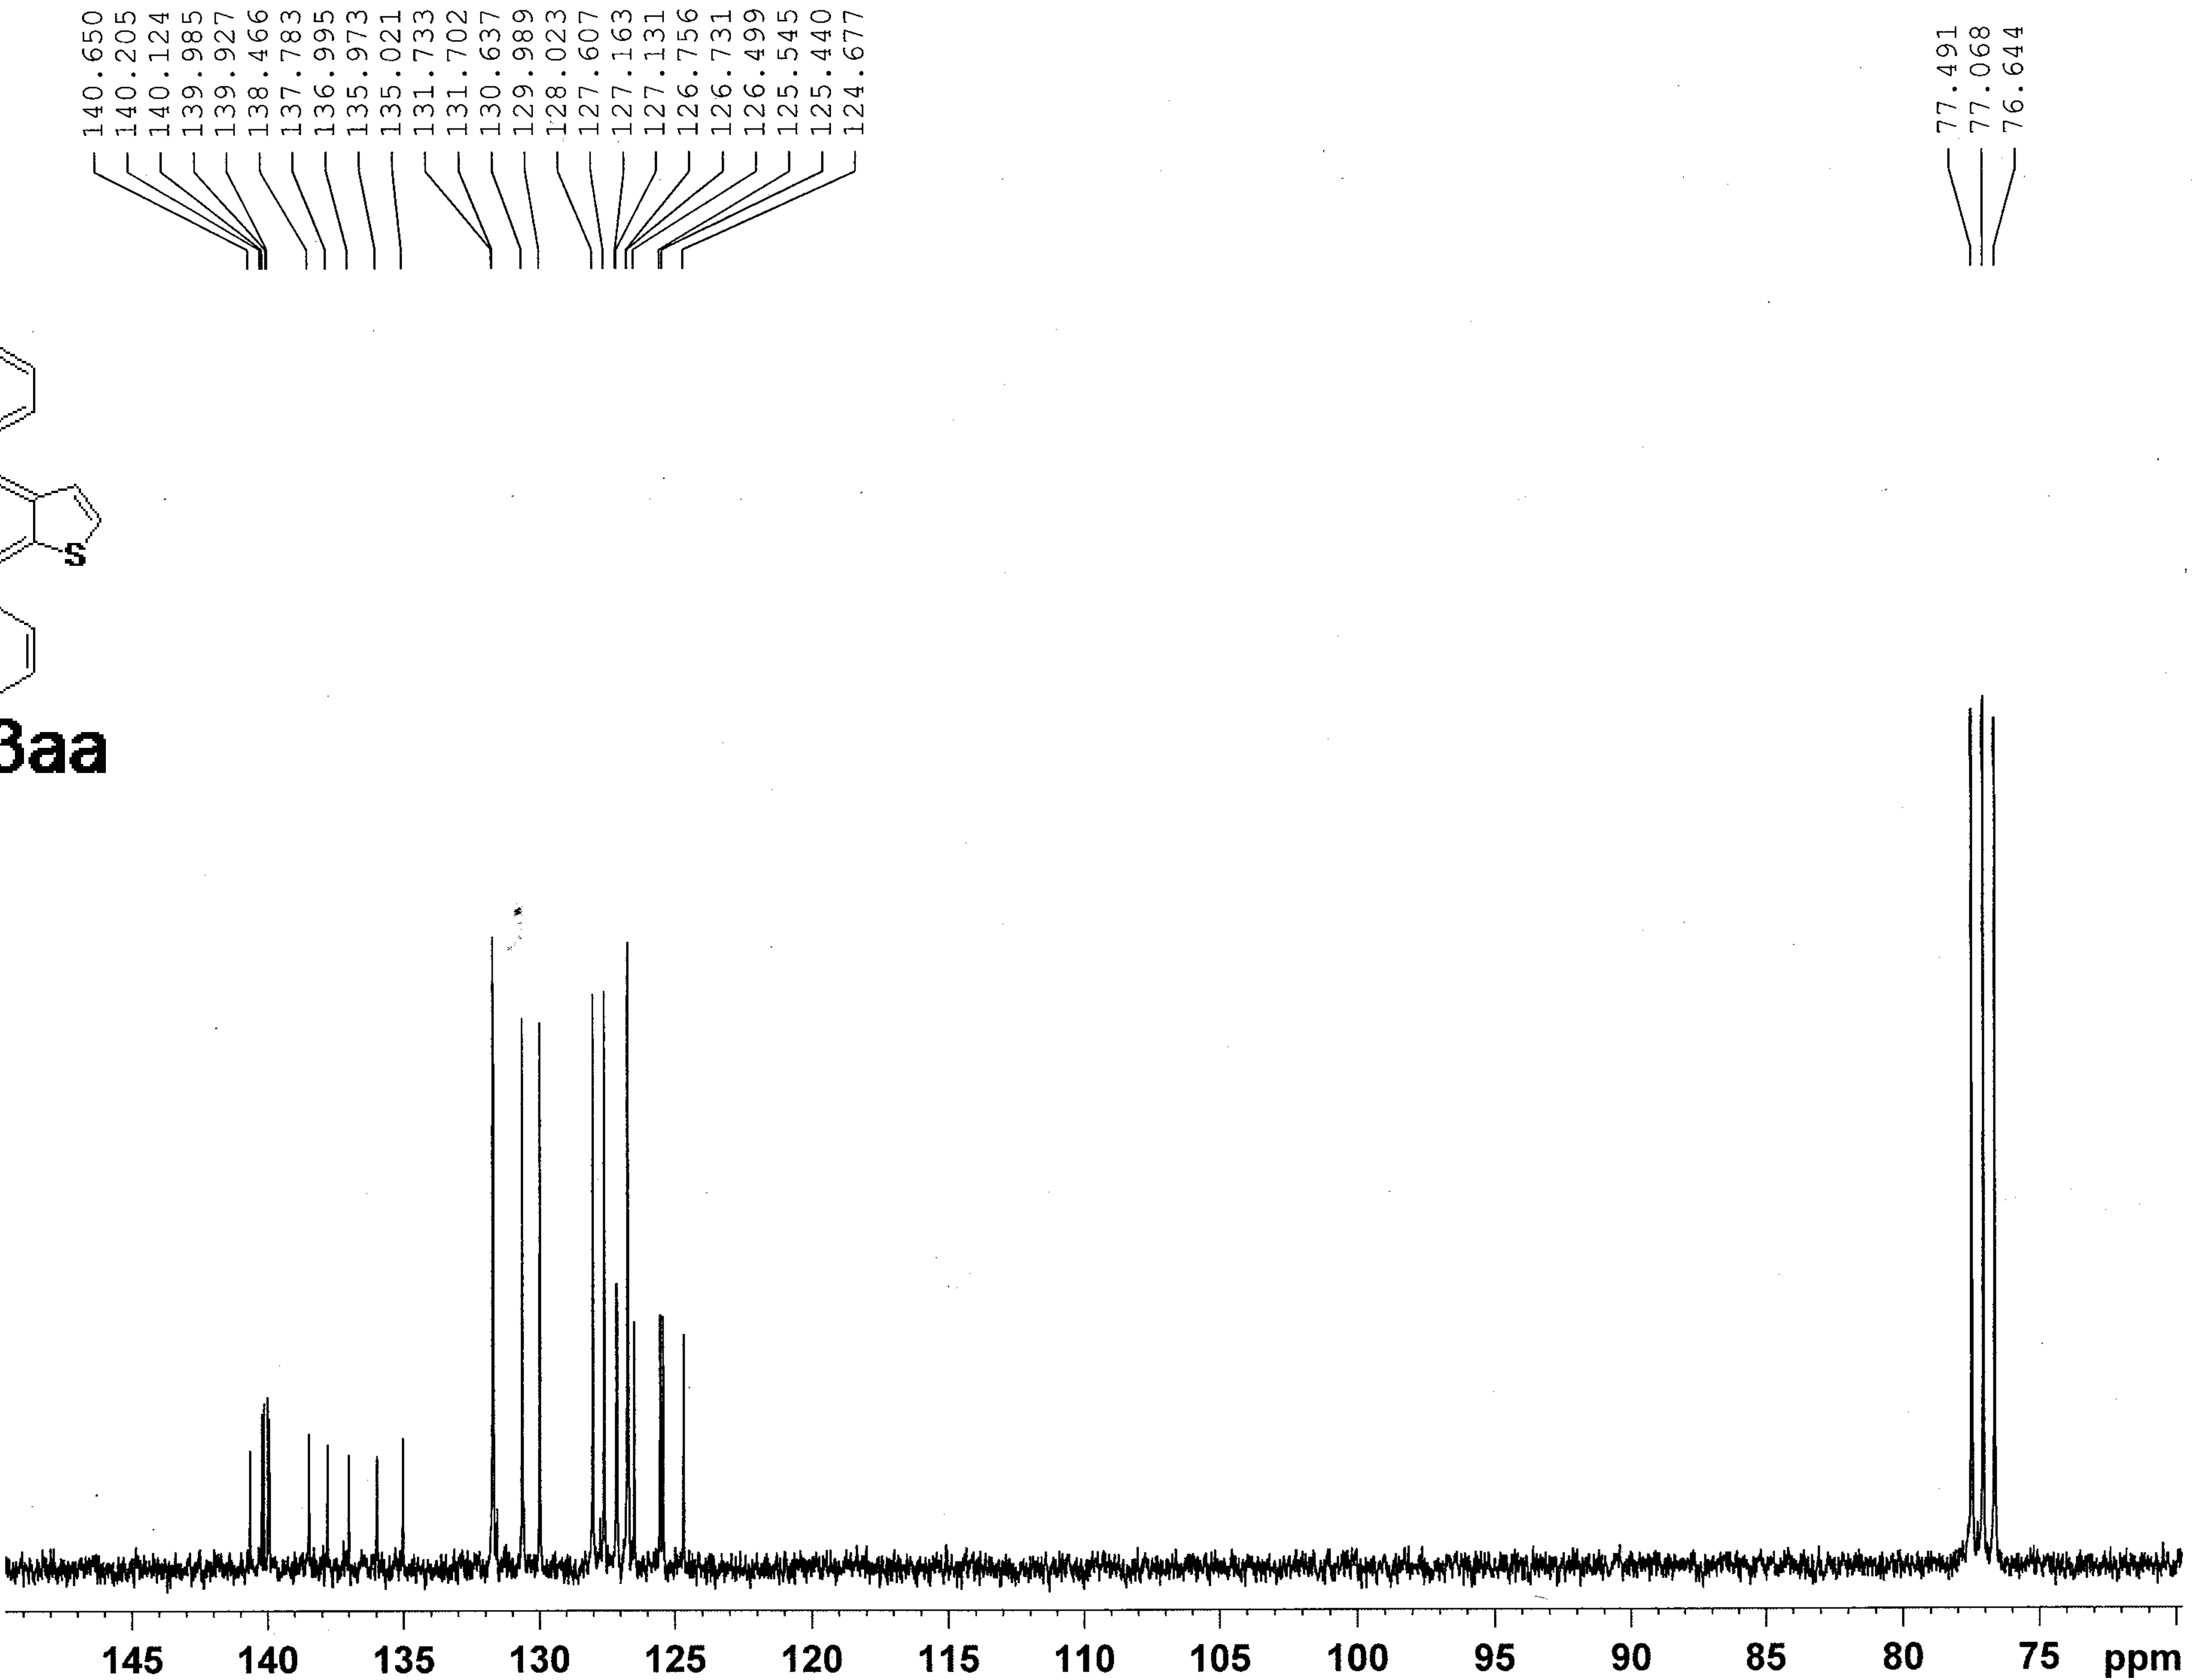

huanghn212 p3proton

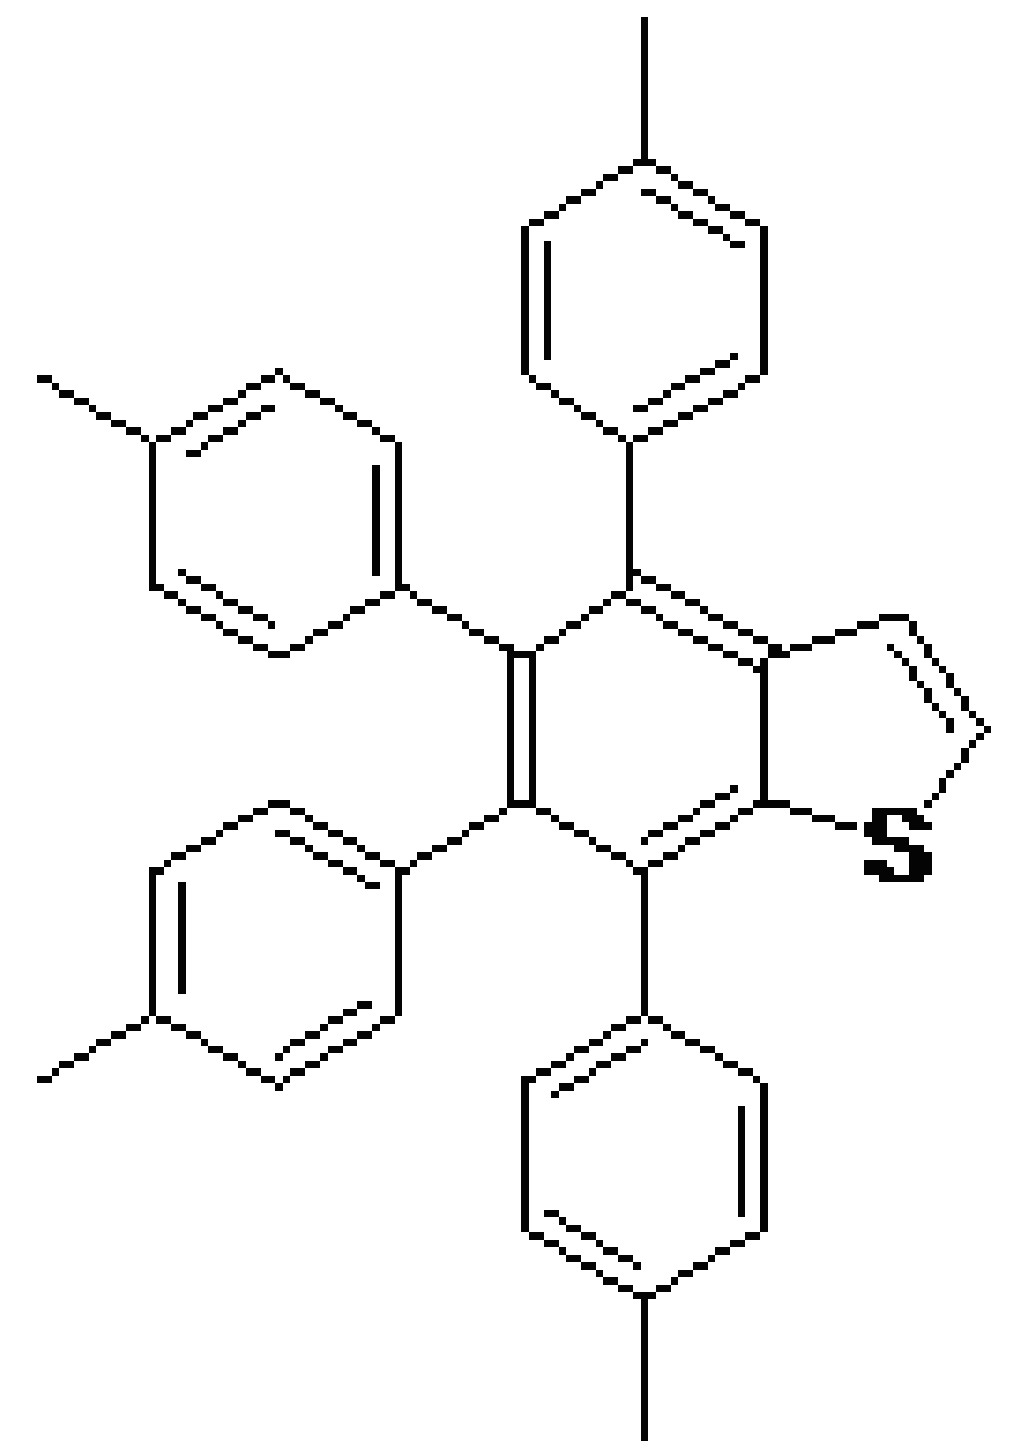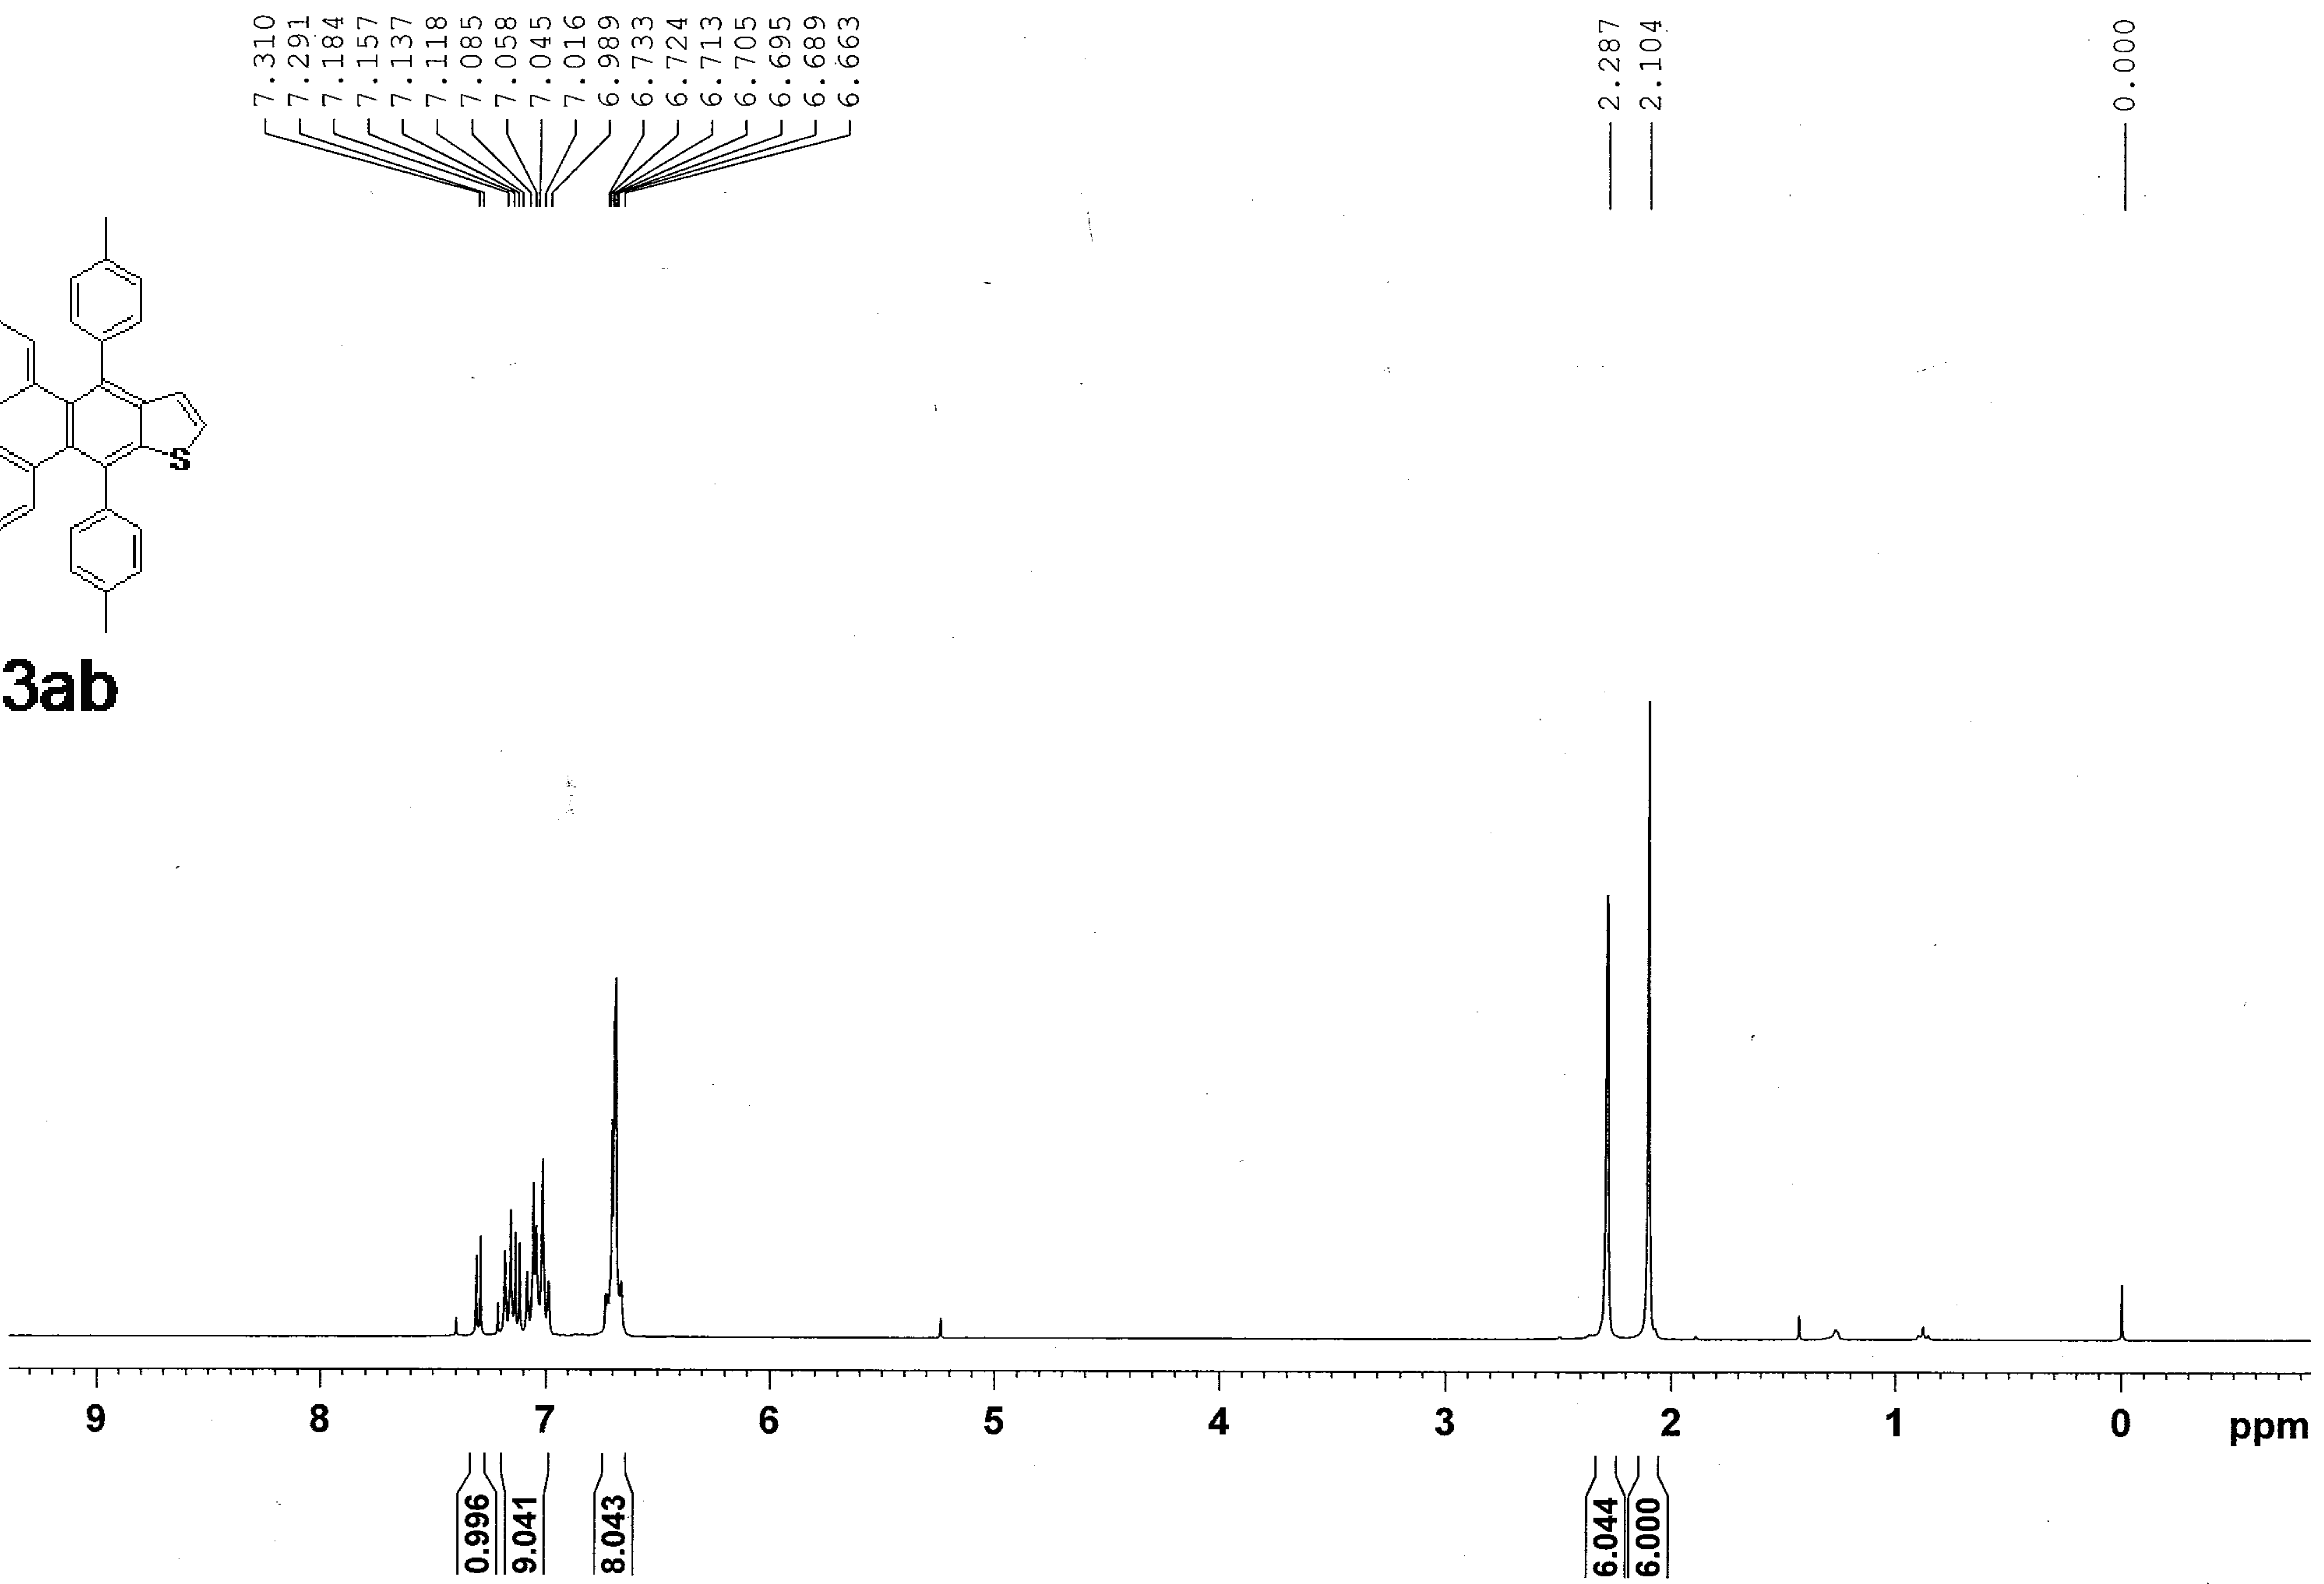

huanghn212 p3 C13CPD

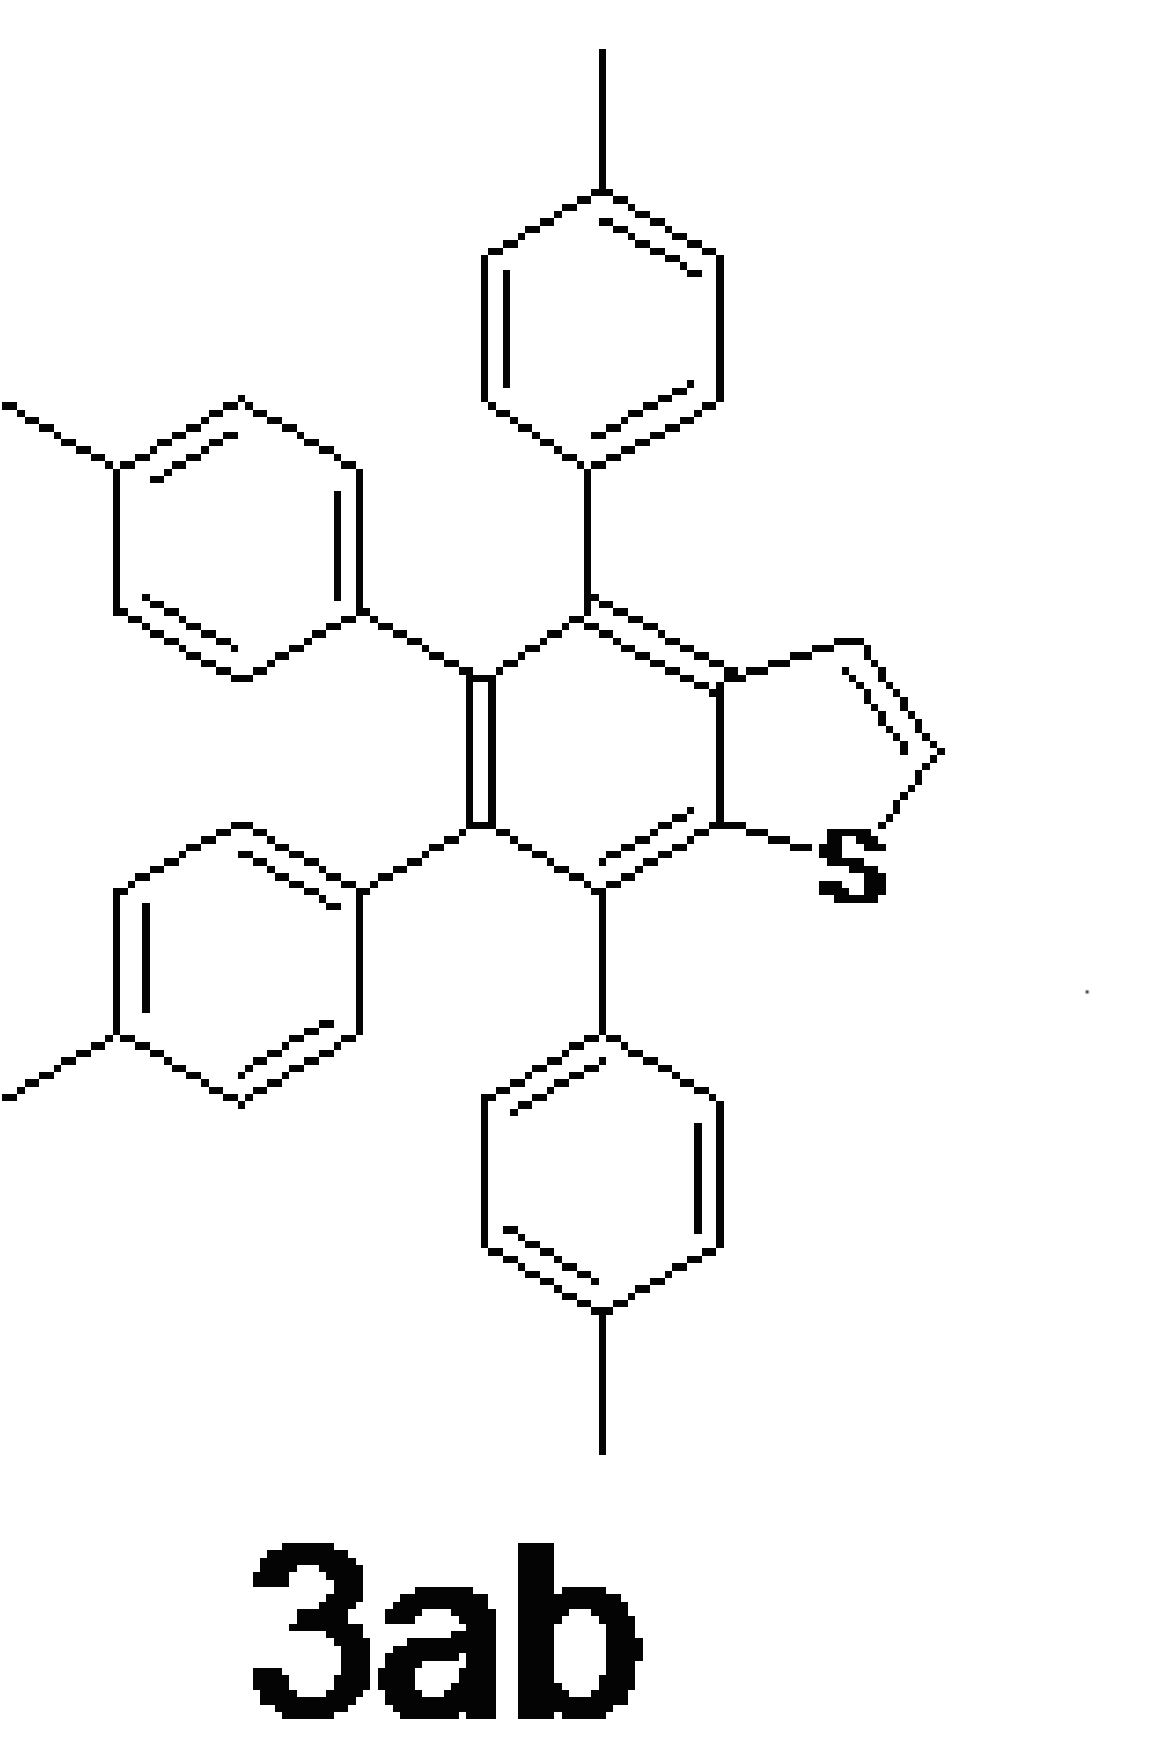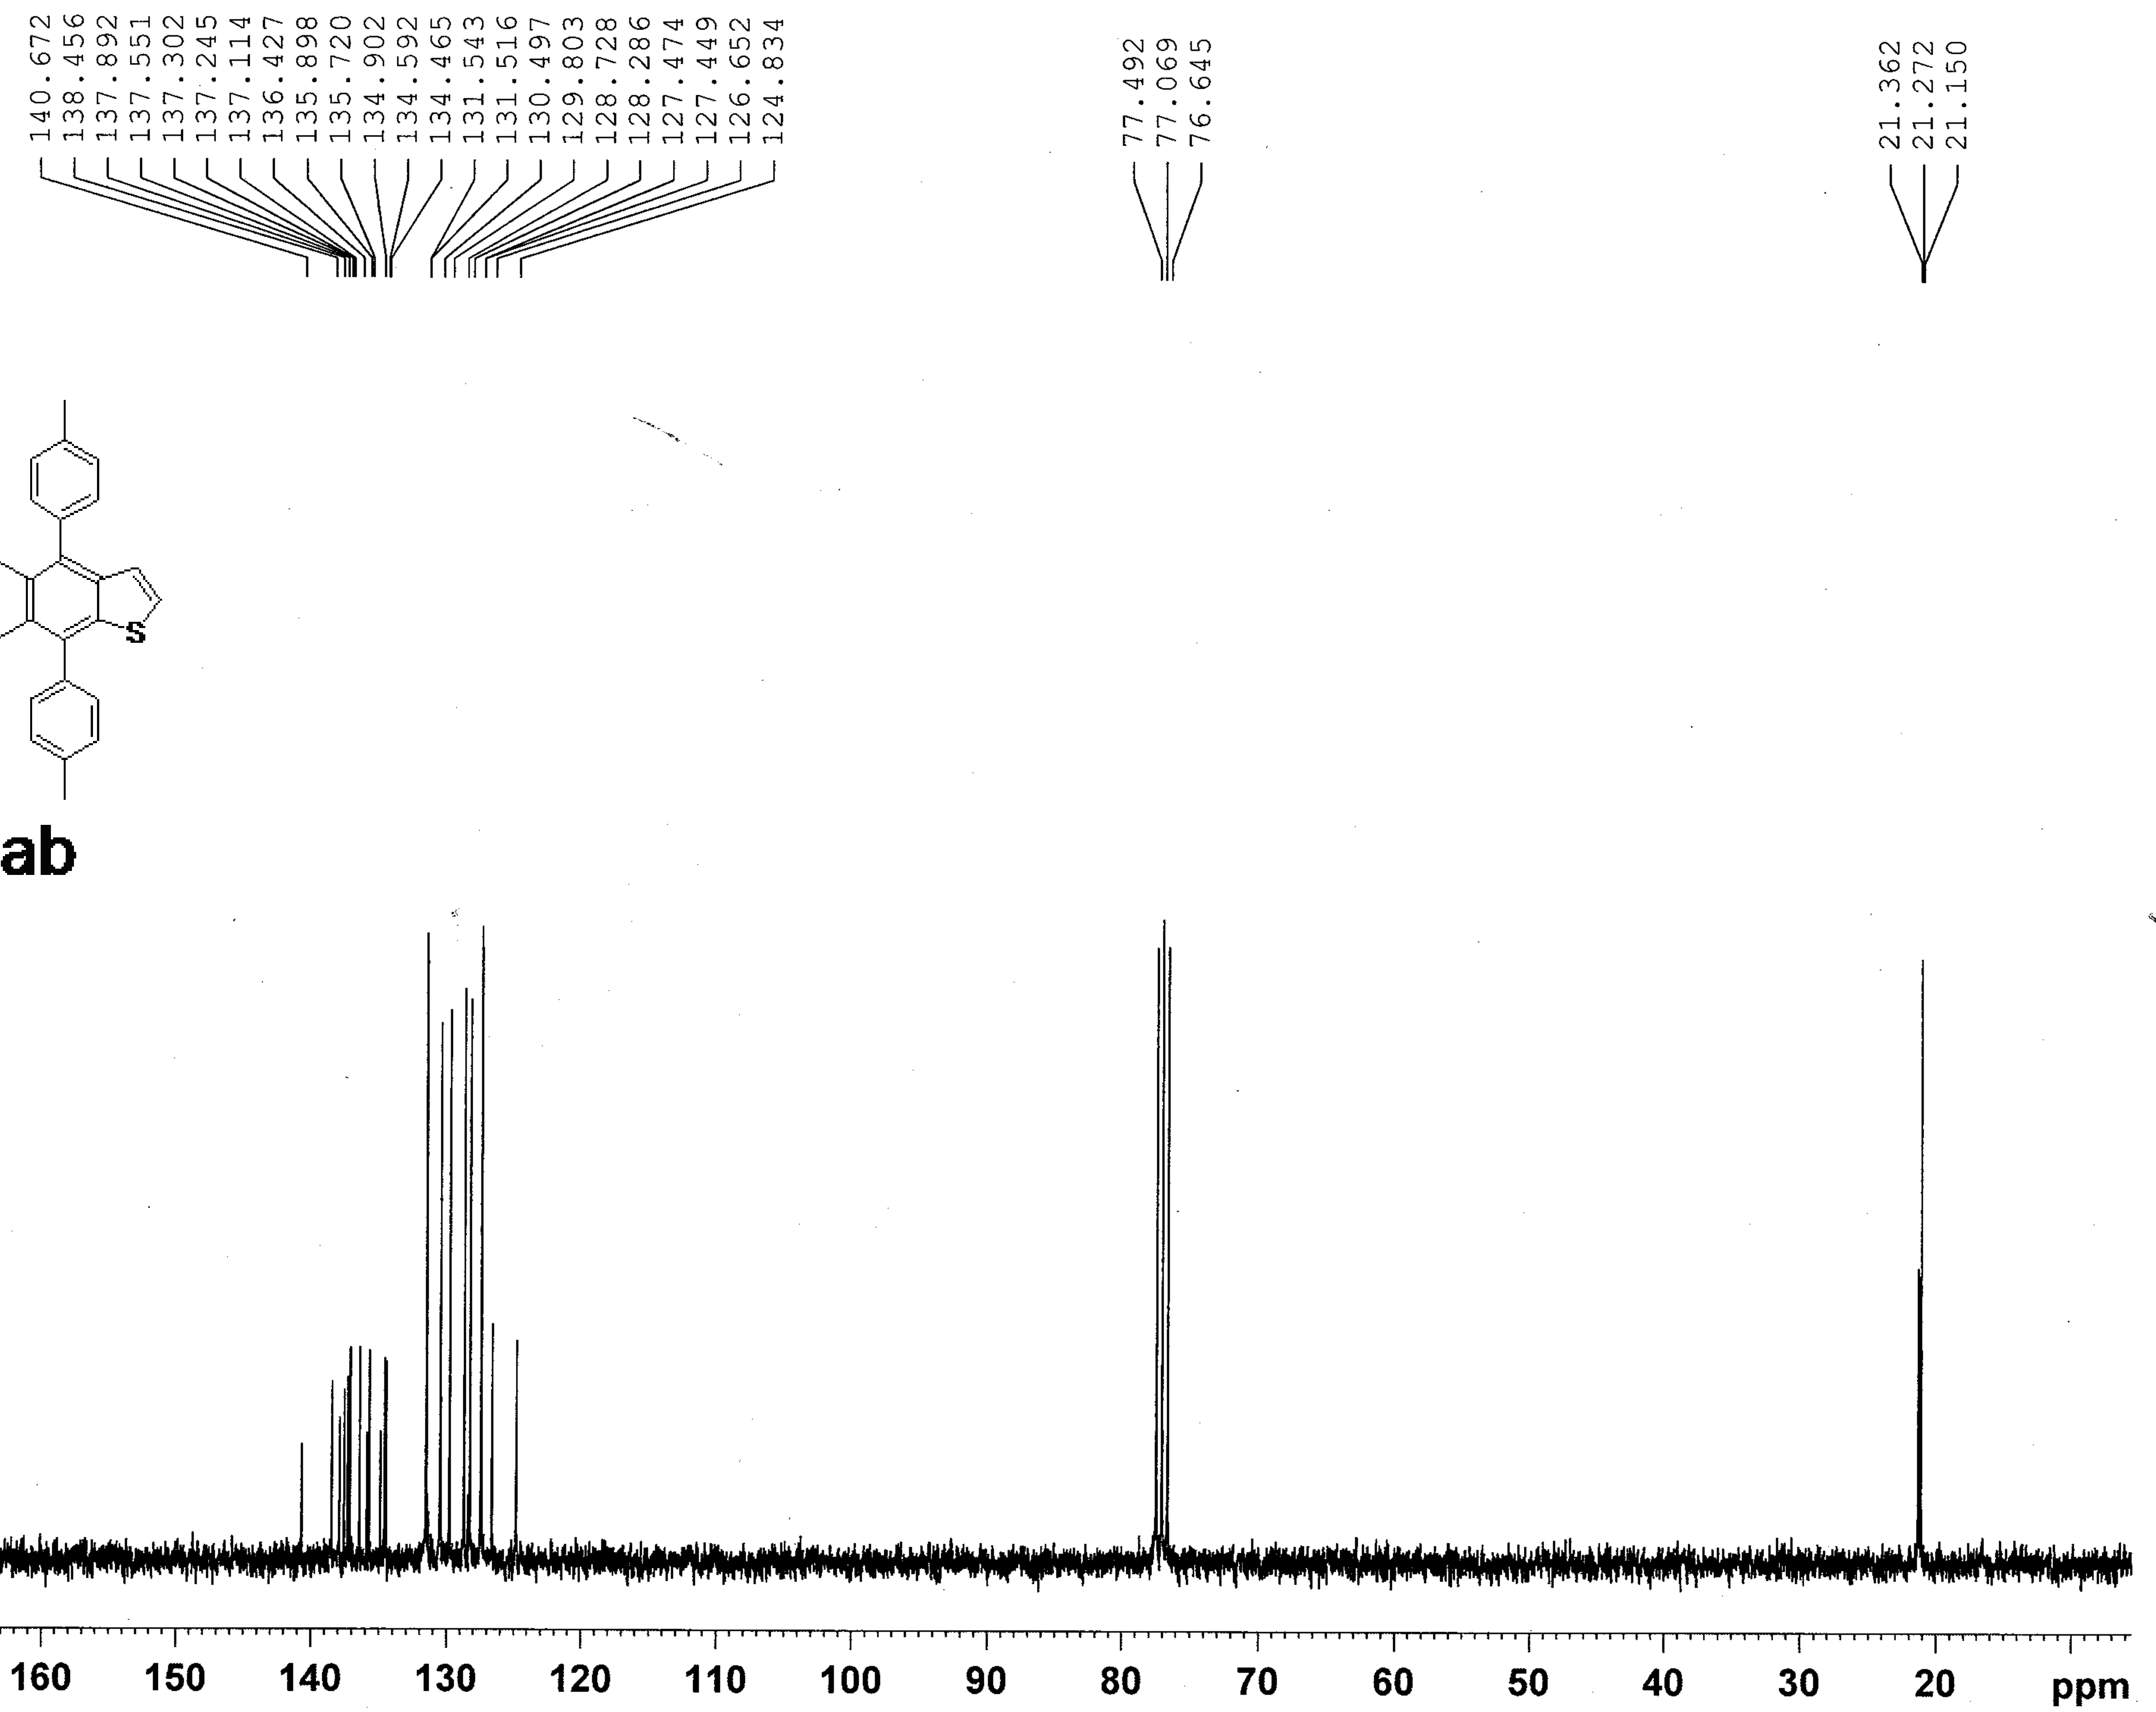

huanghn 228 p3 PROTON

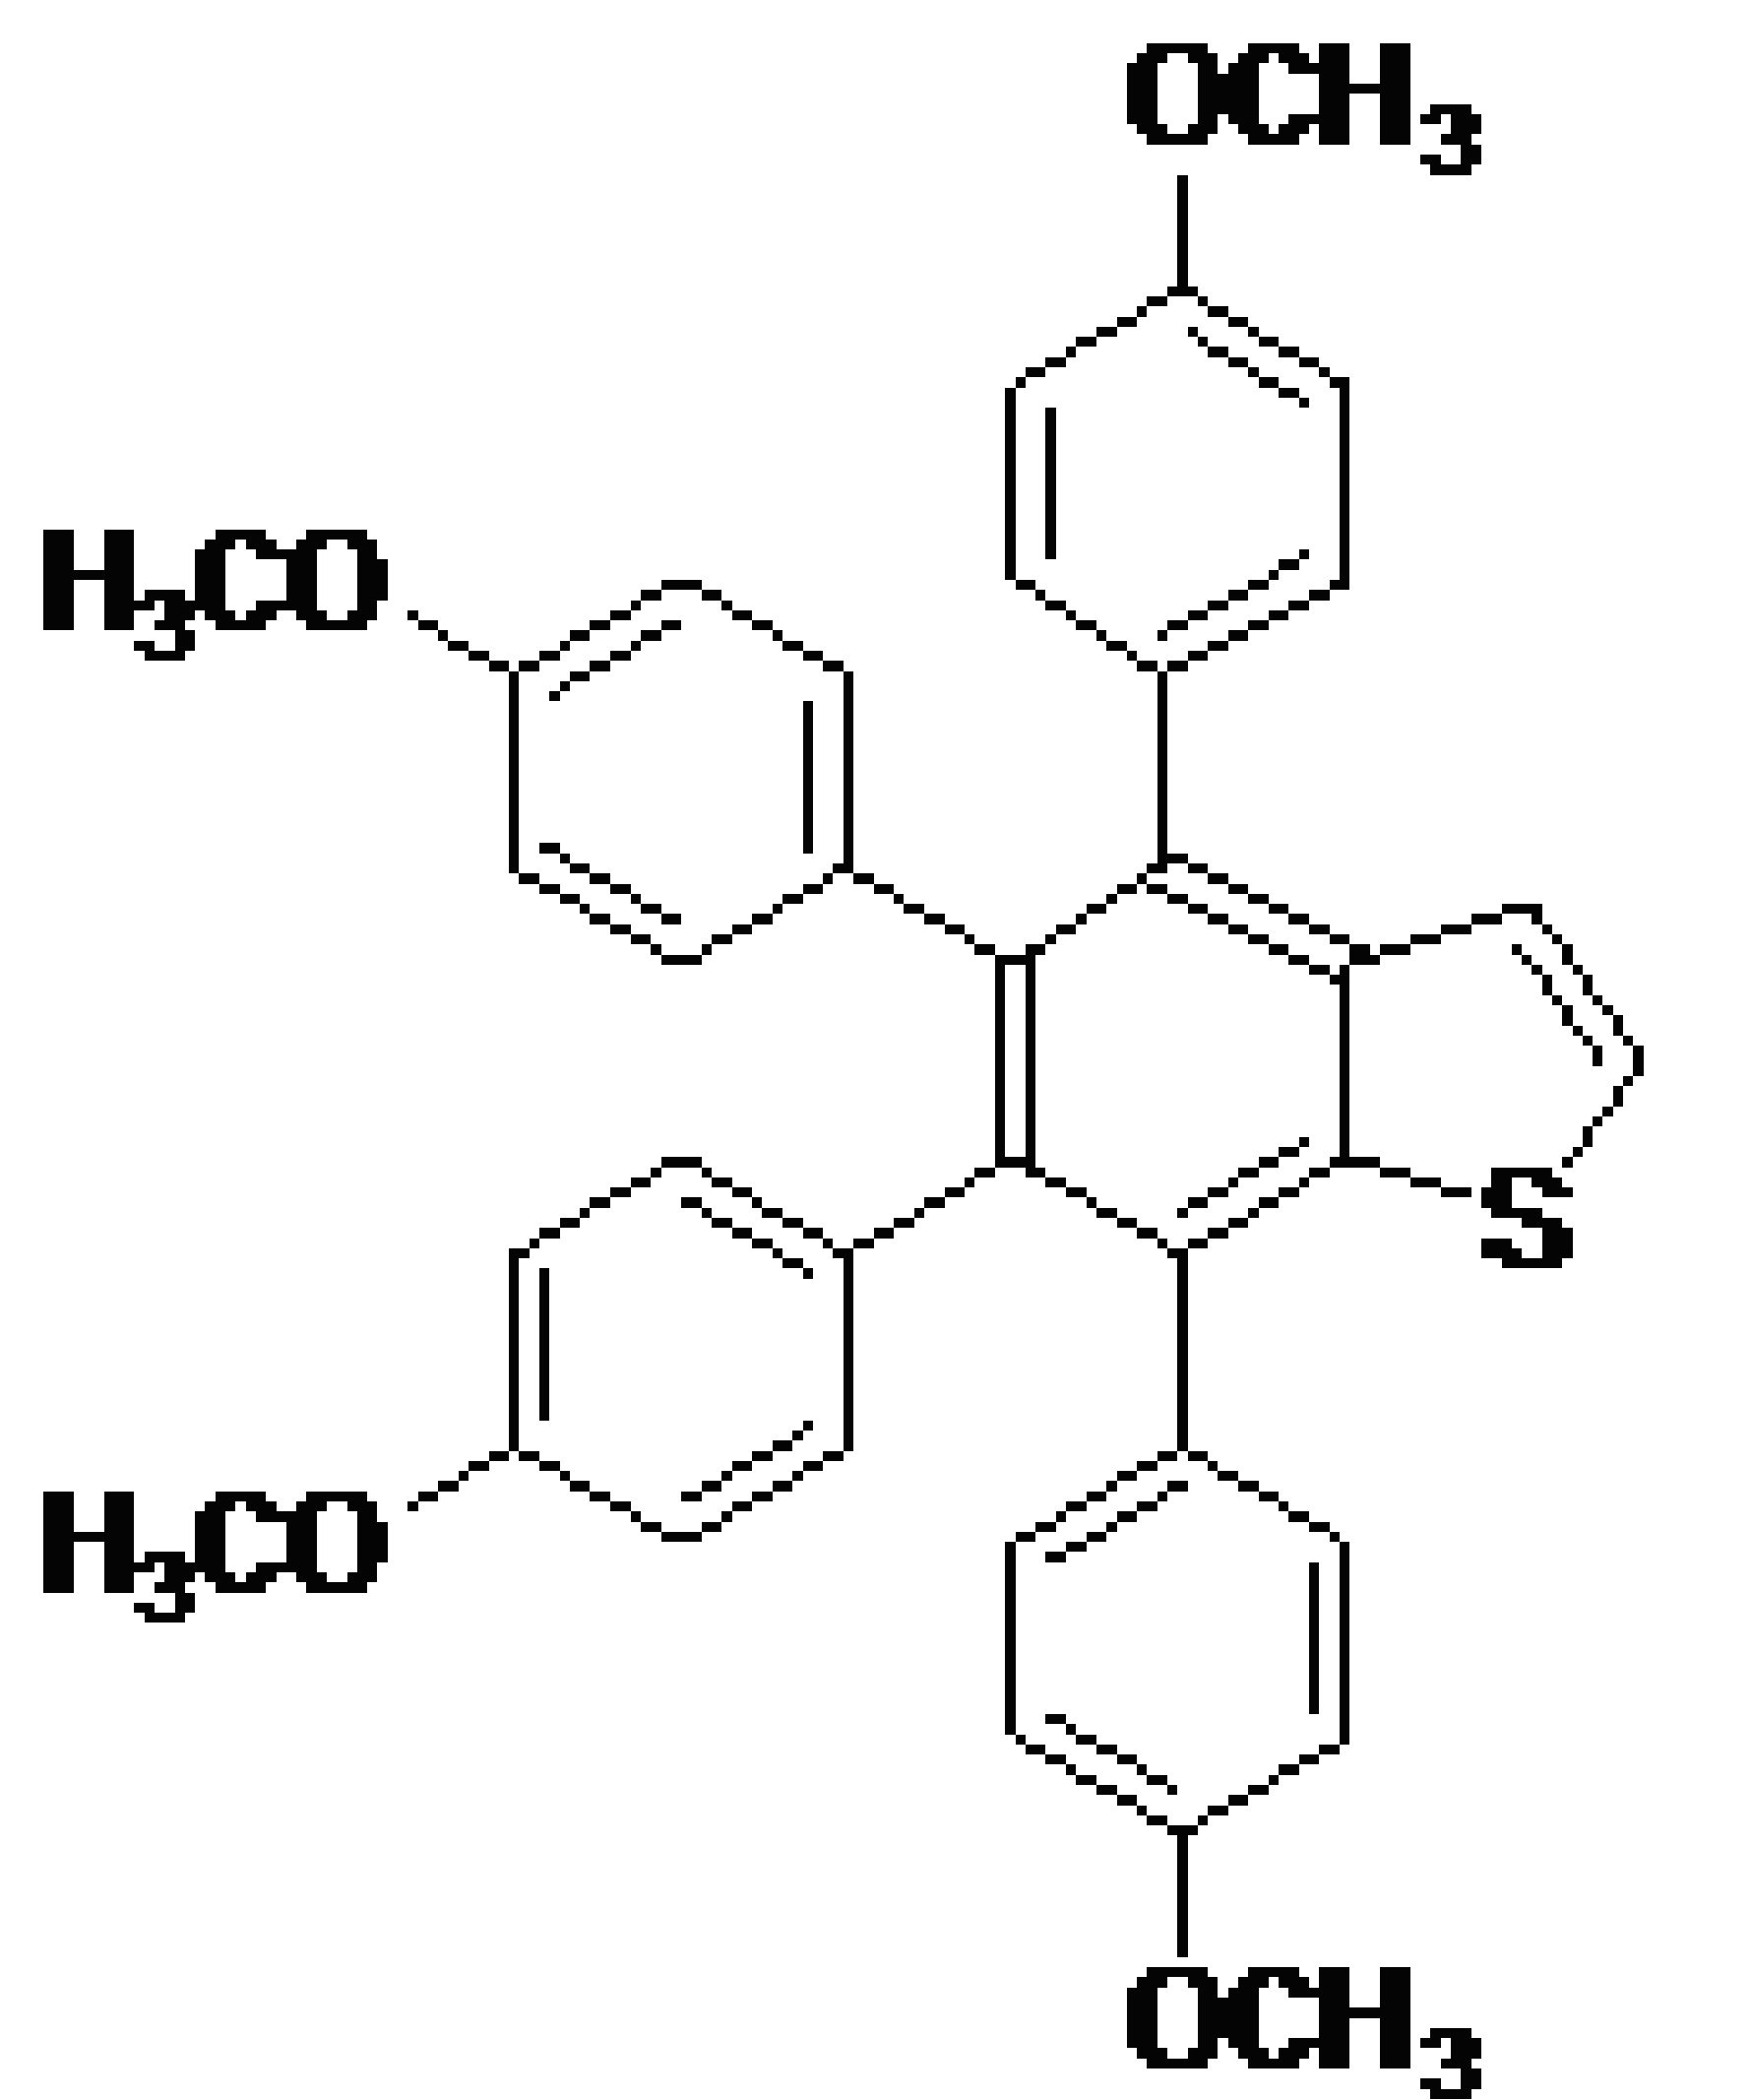

**3ac**

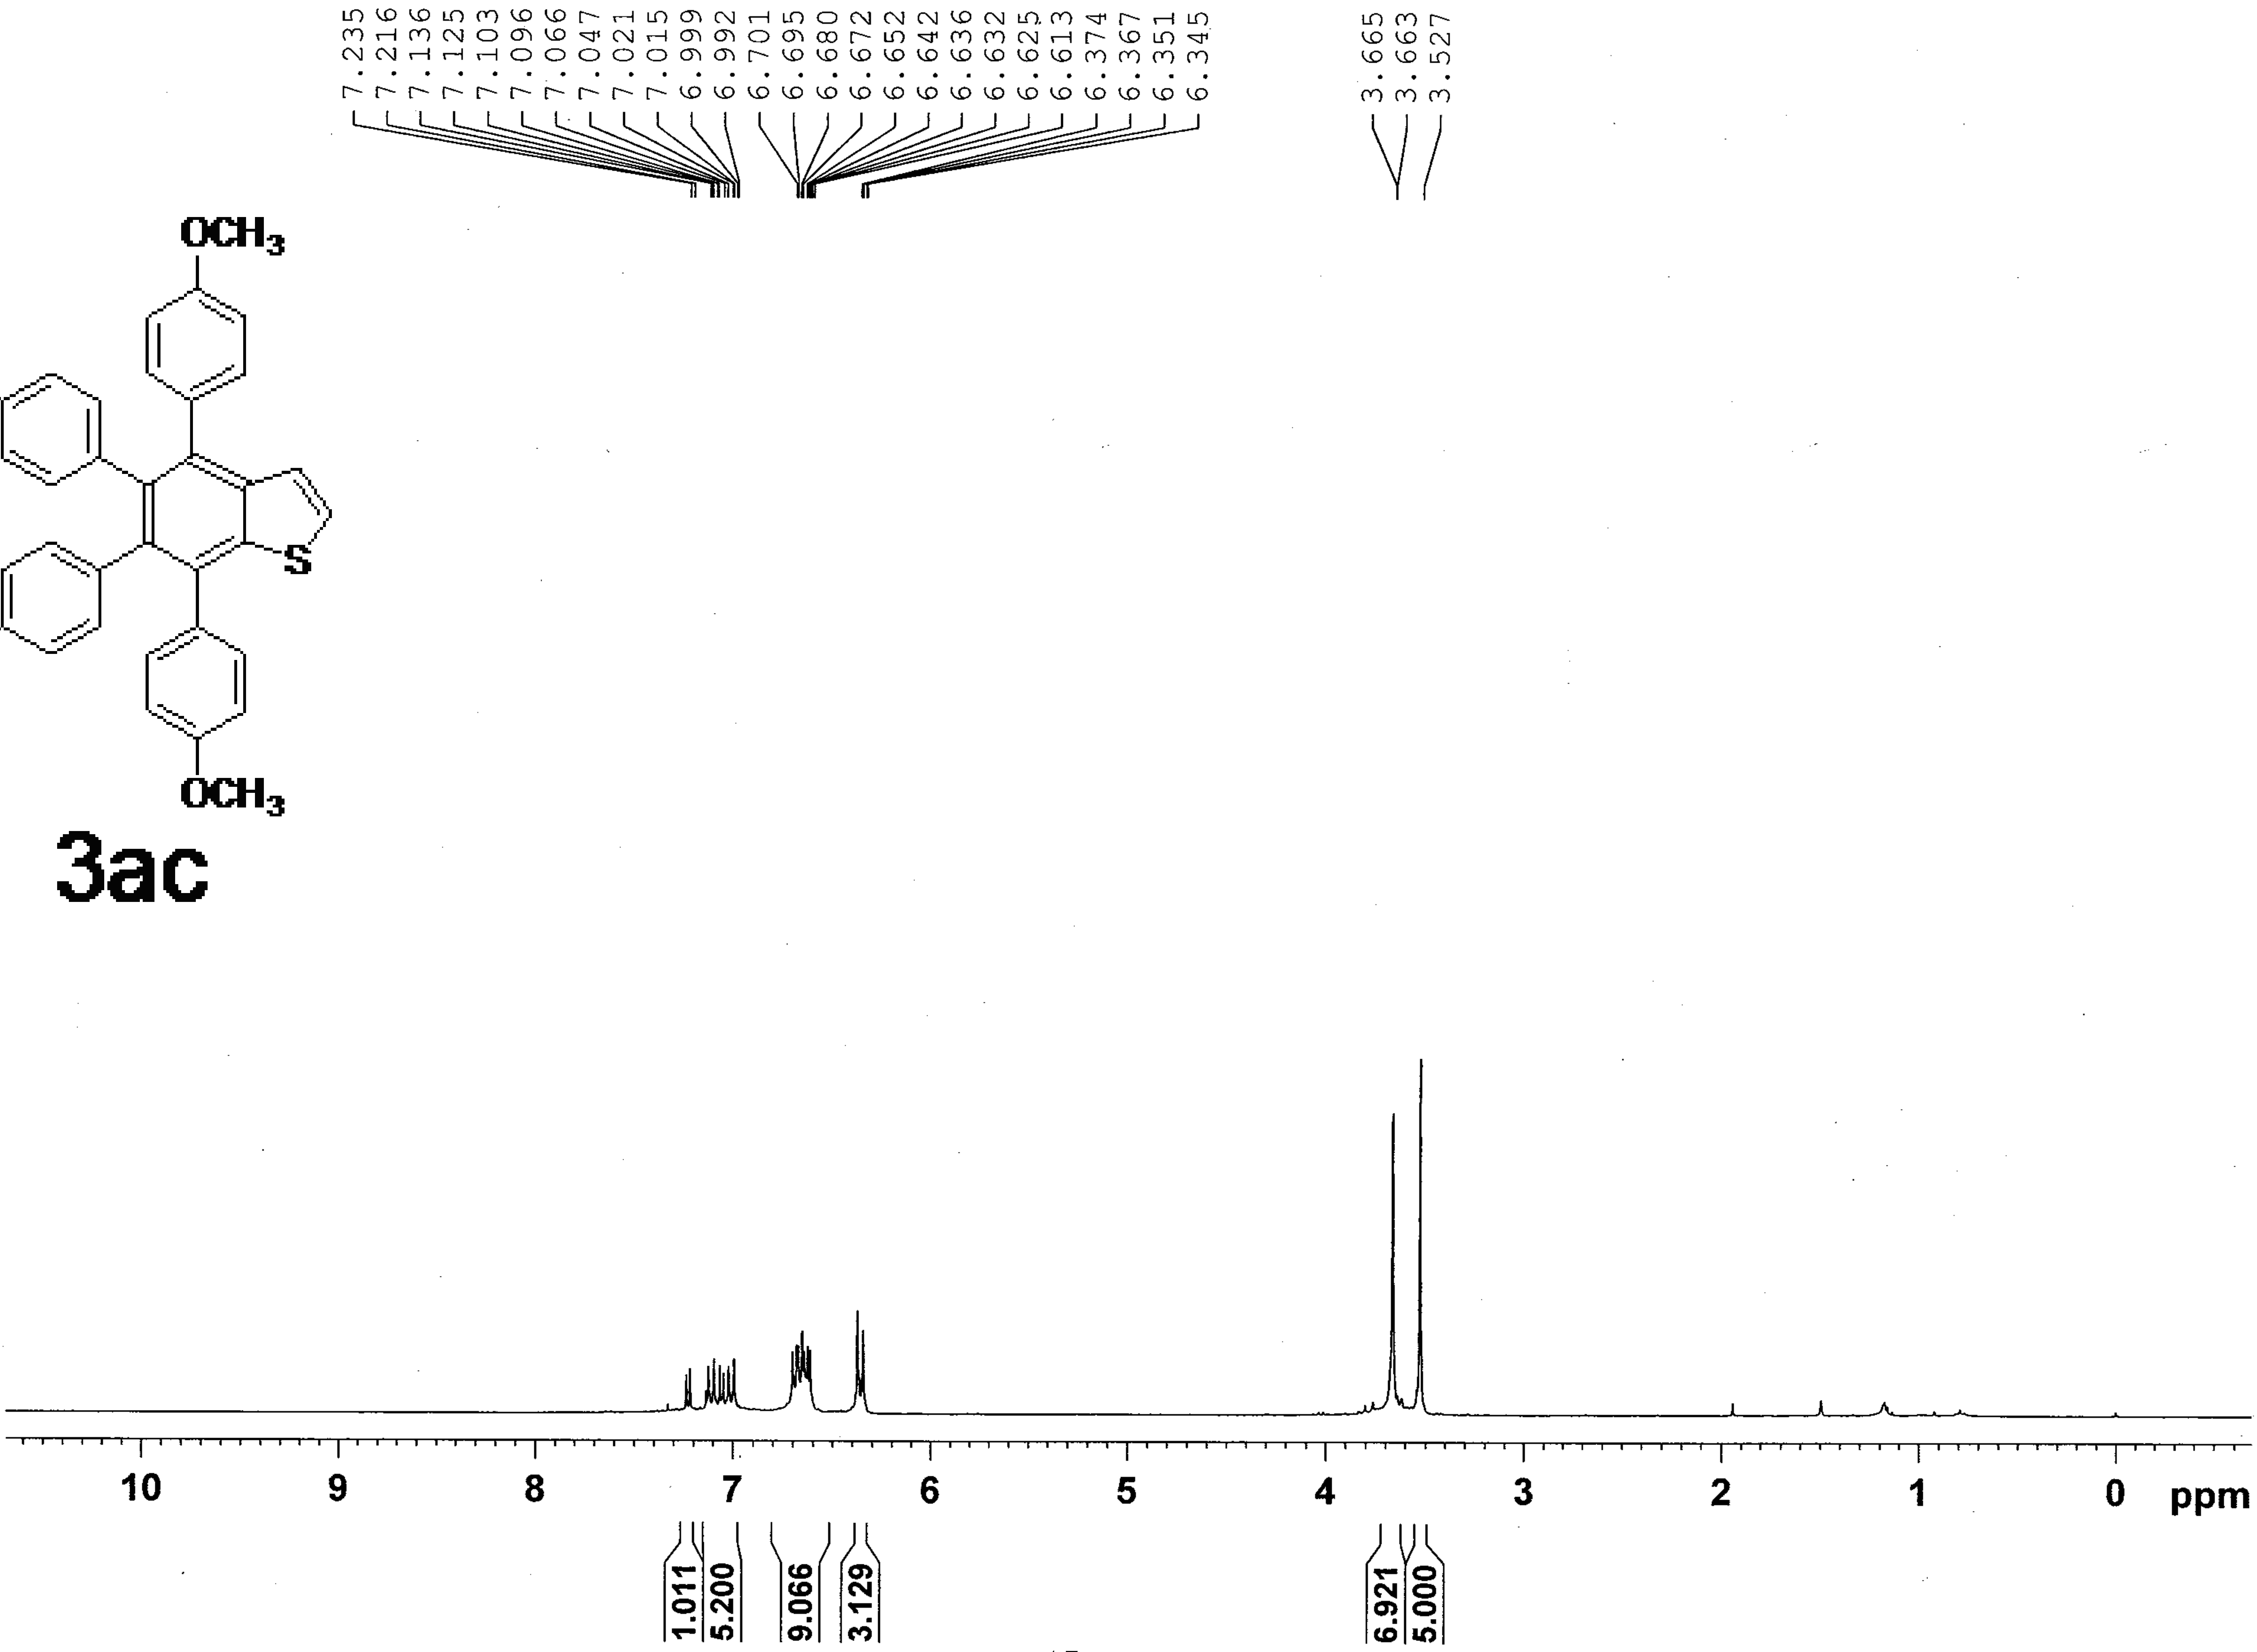

huanghn 228 p3 C13CPD

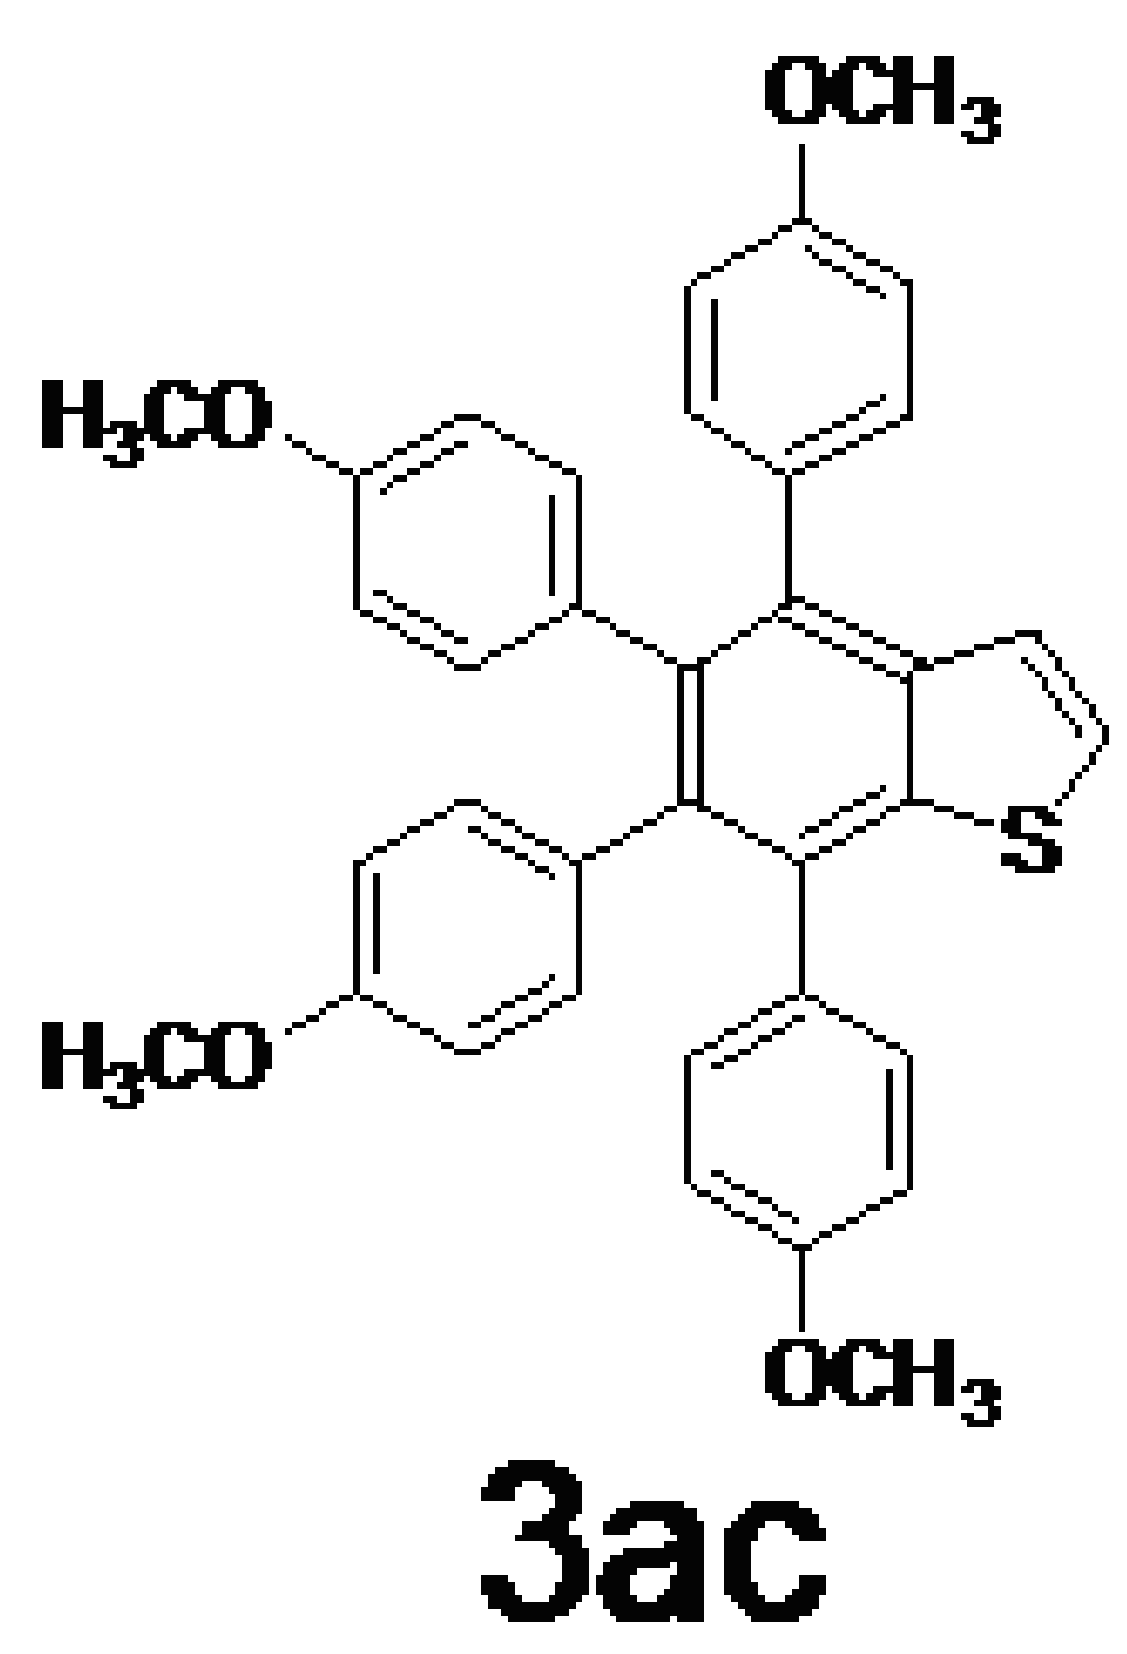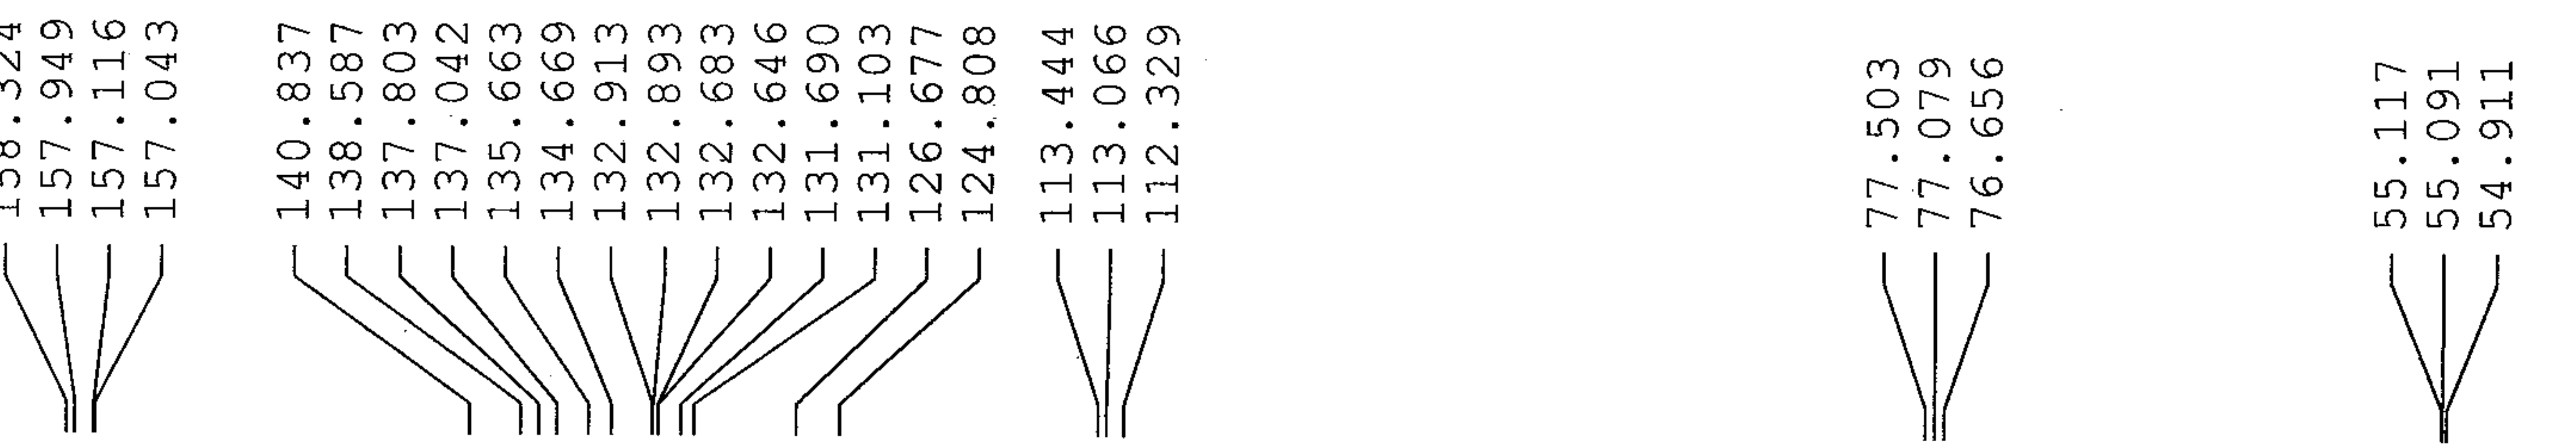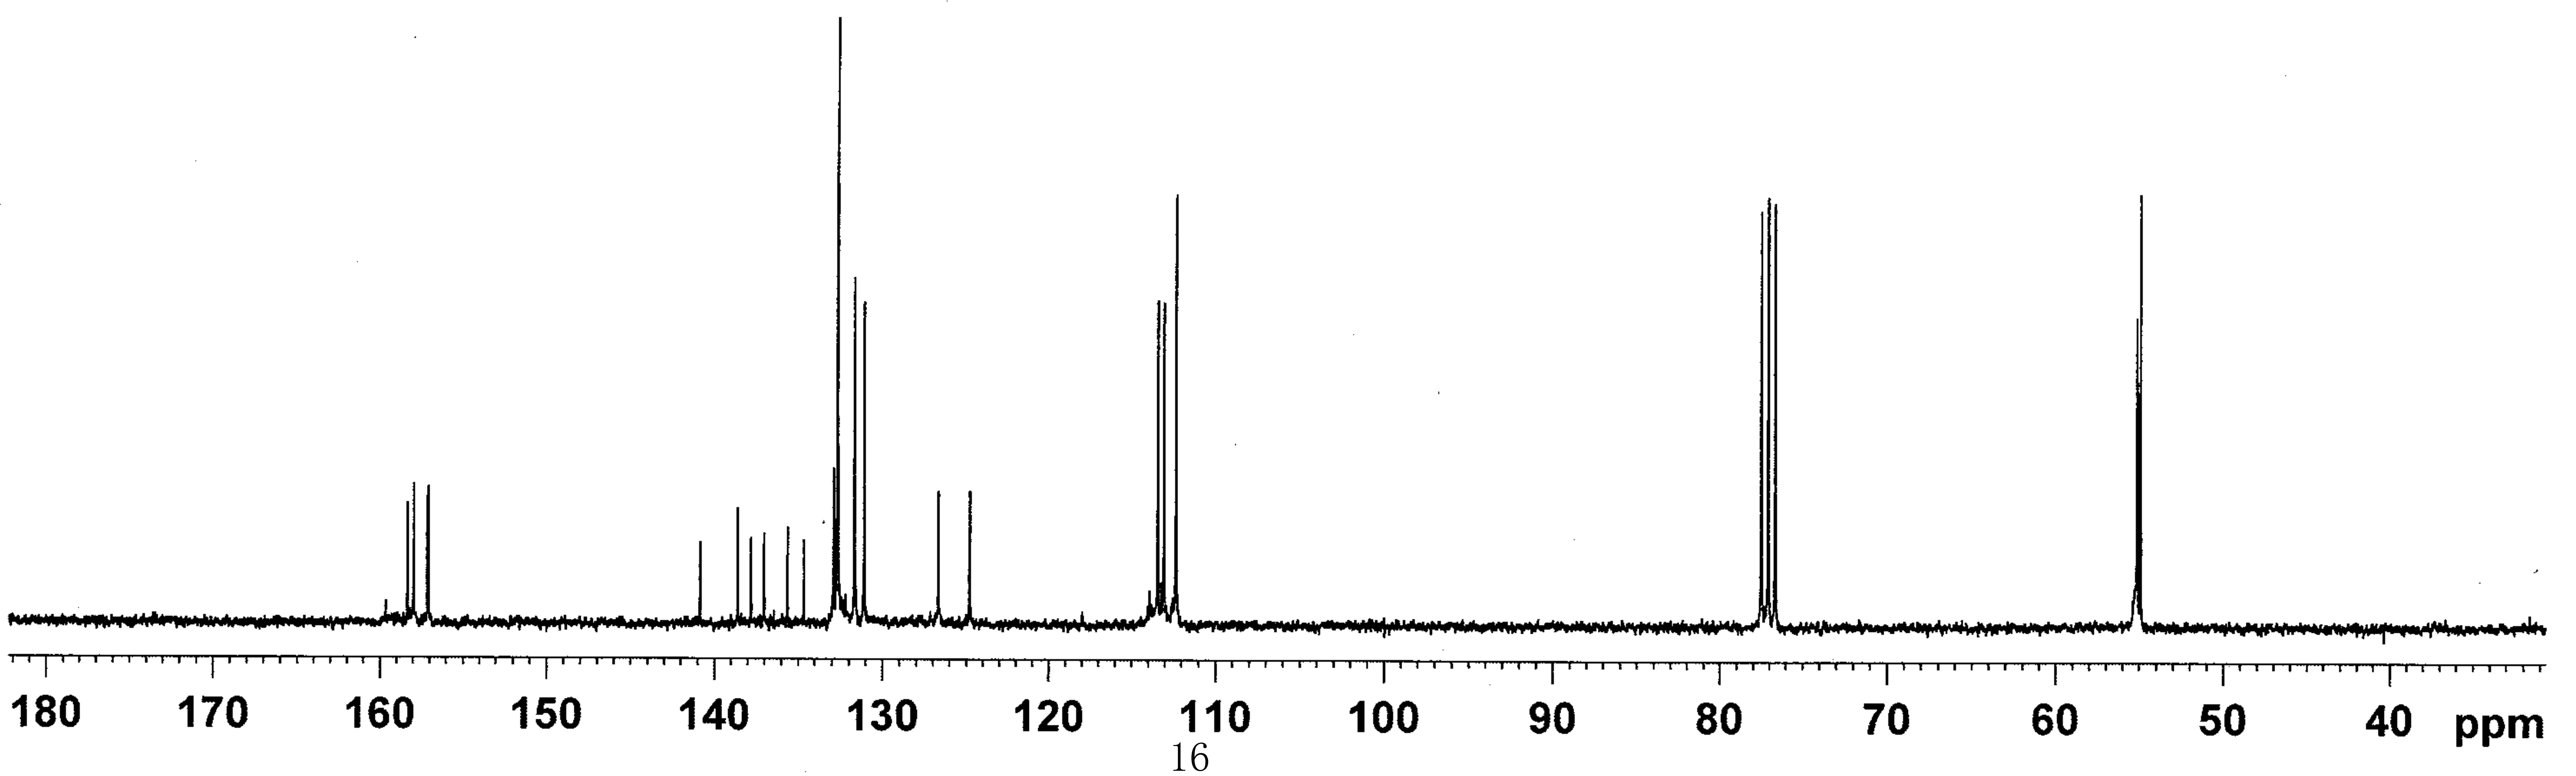



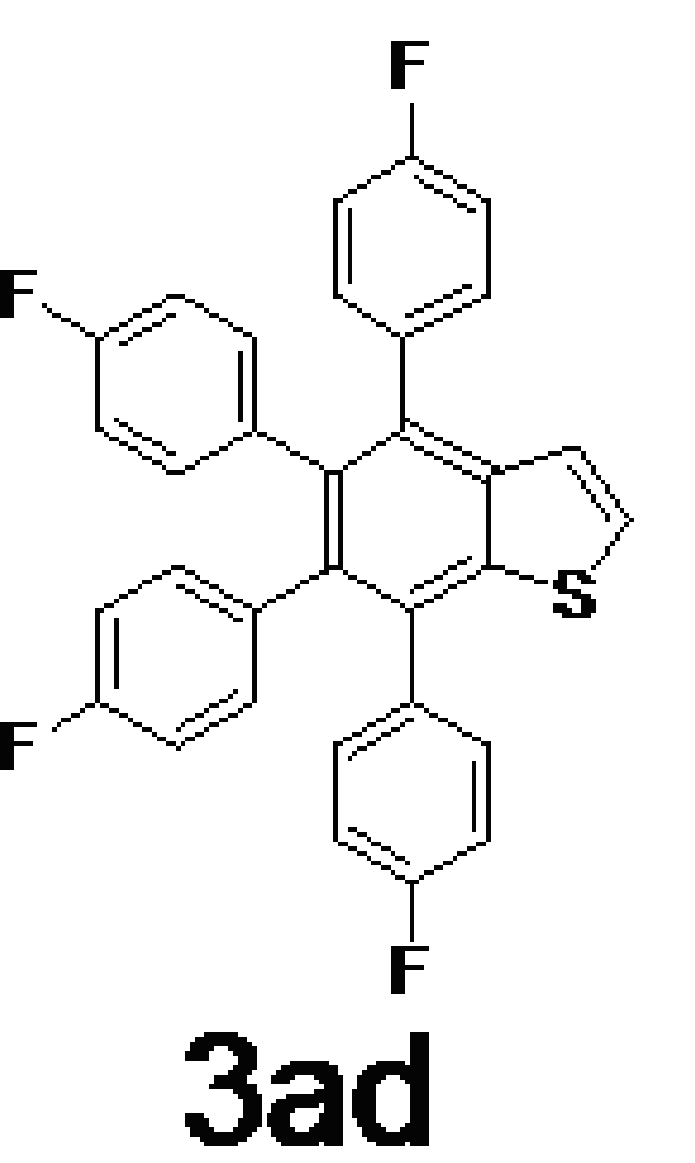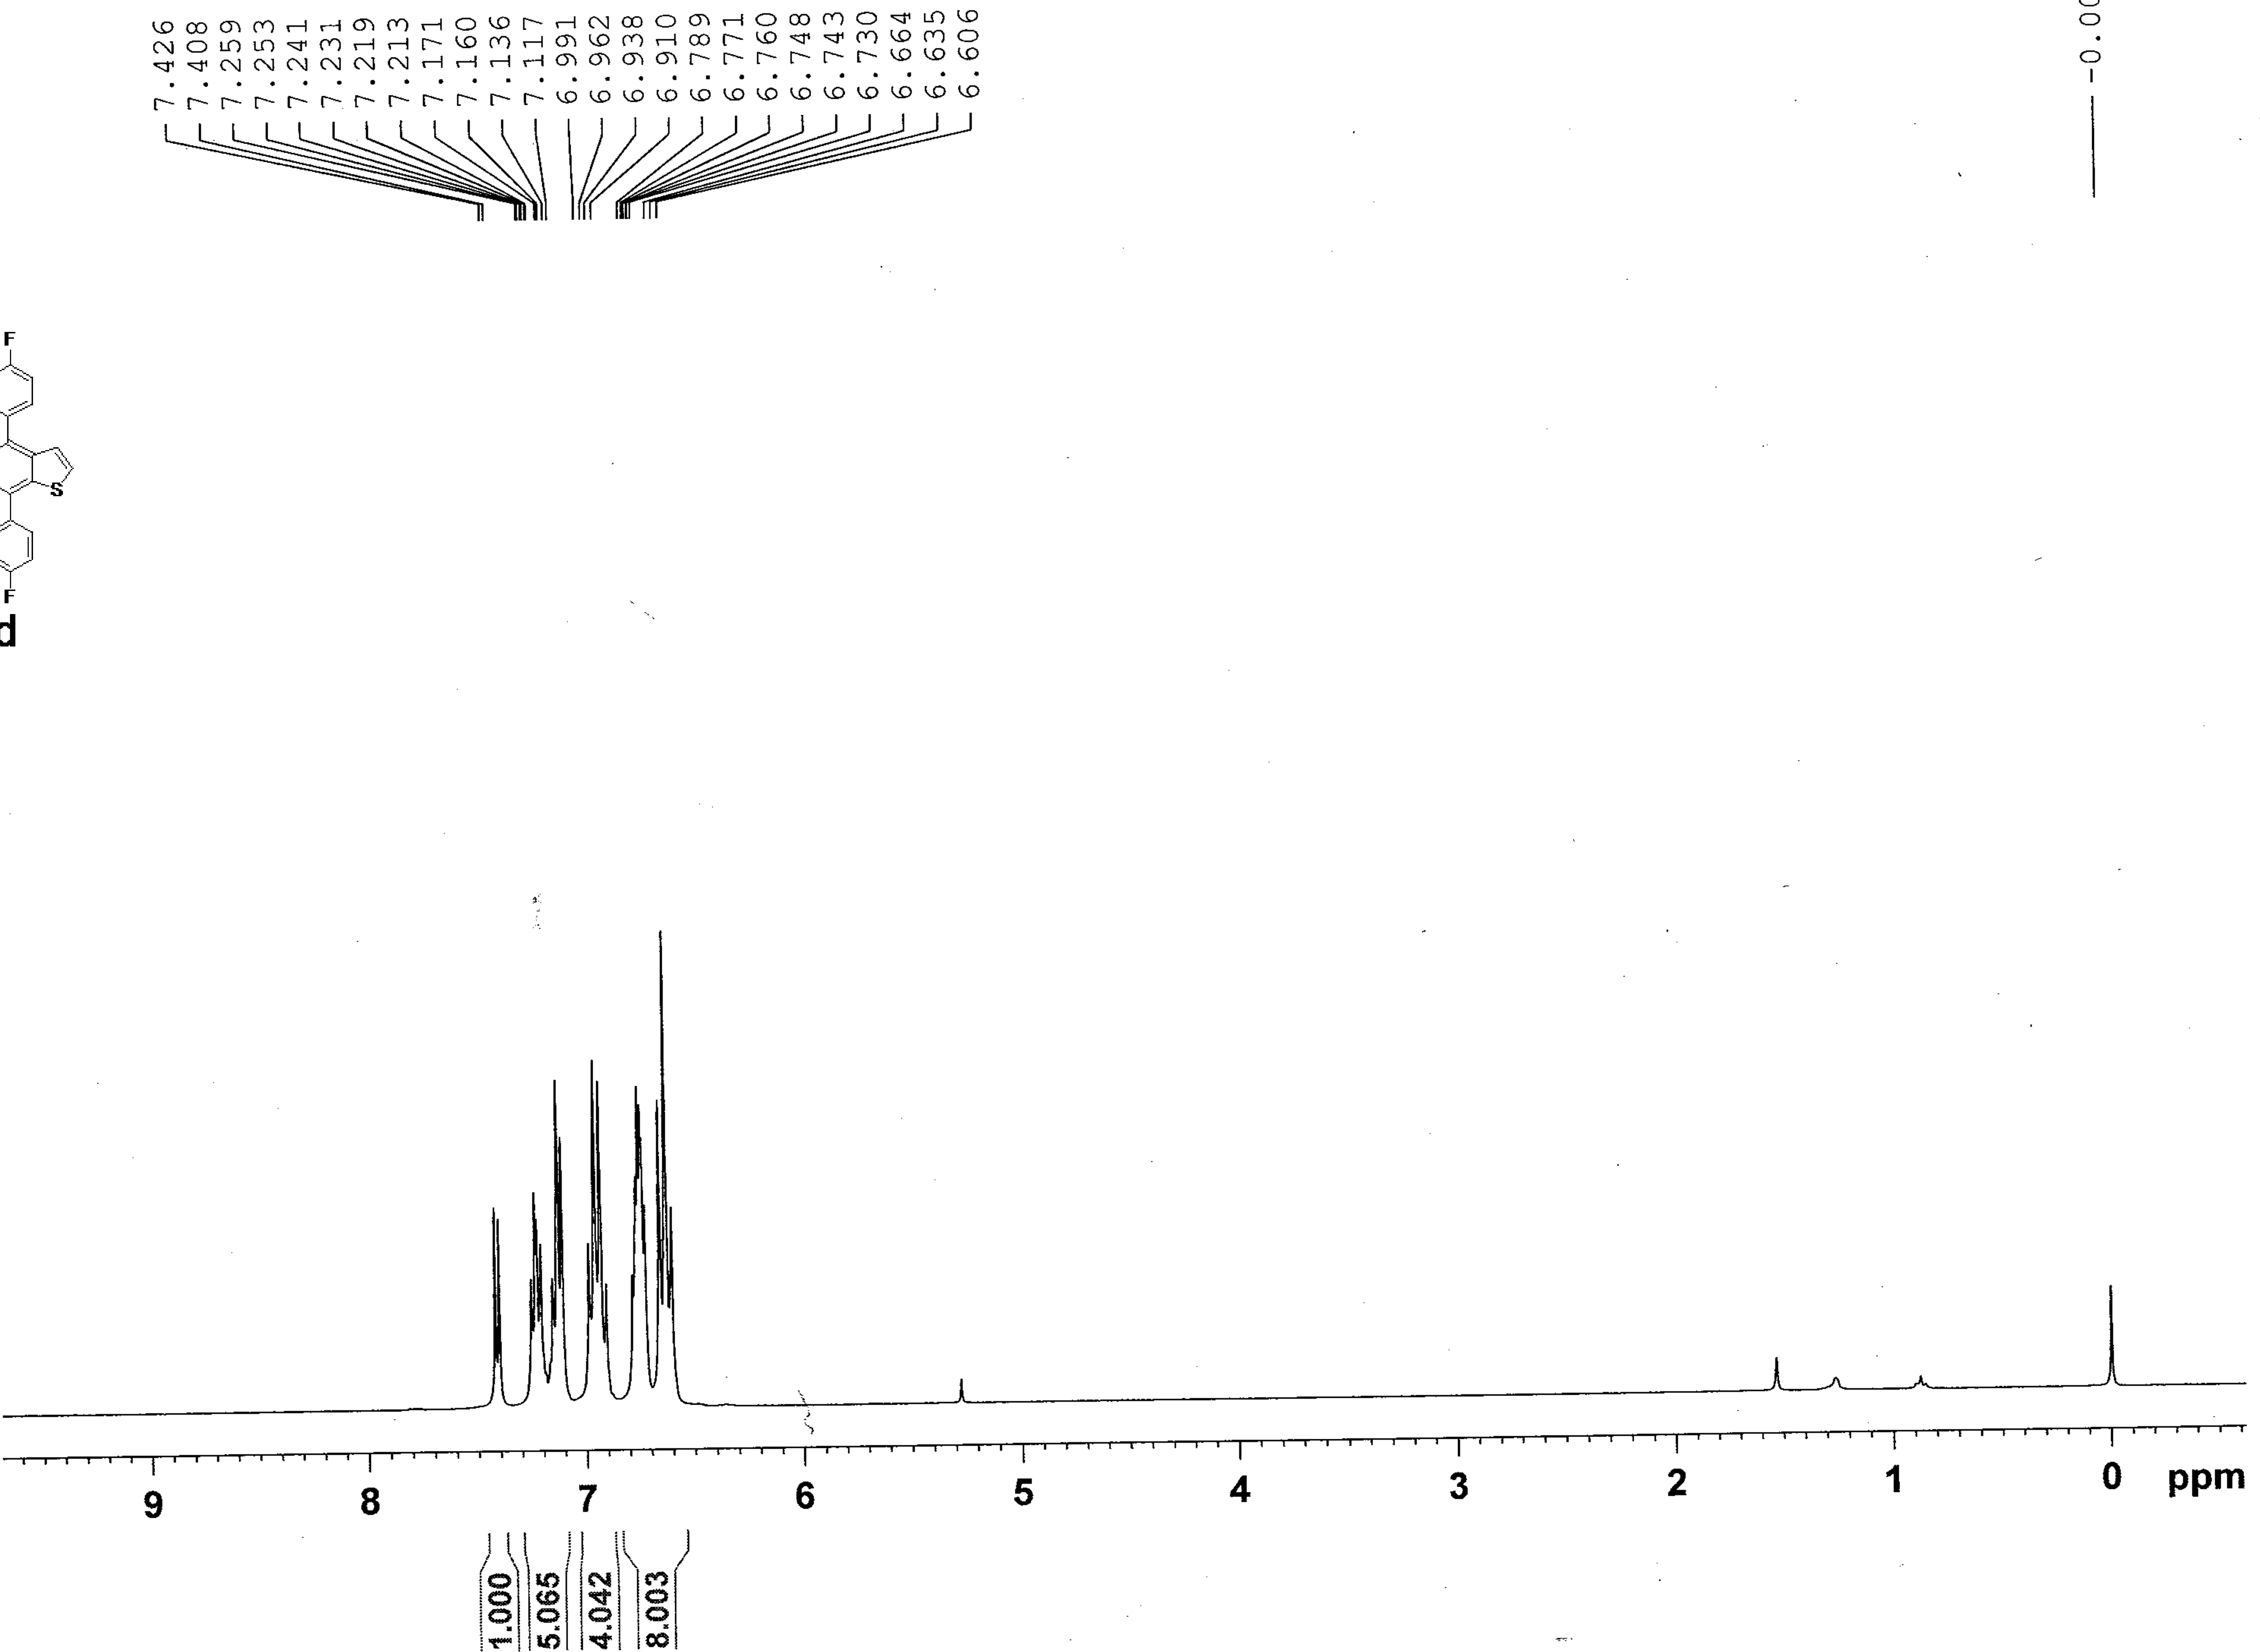

huanghn317 p3 C13CPD

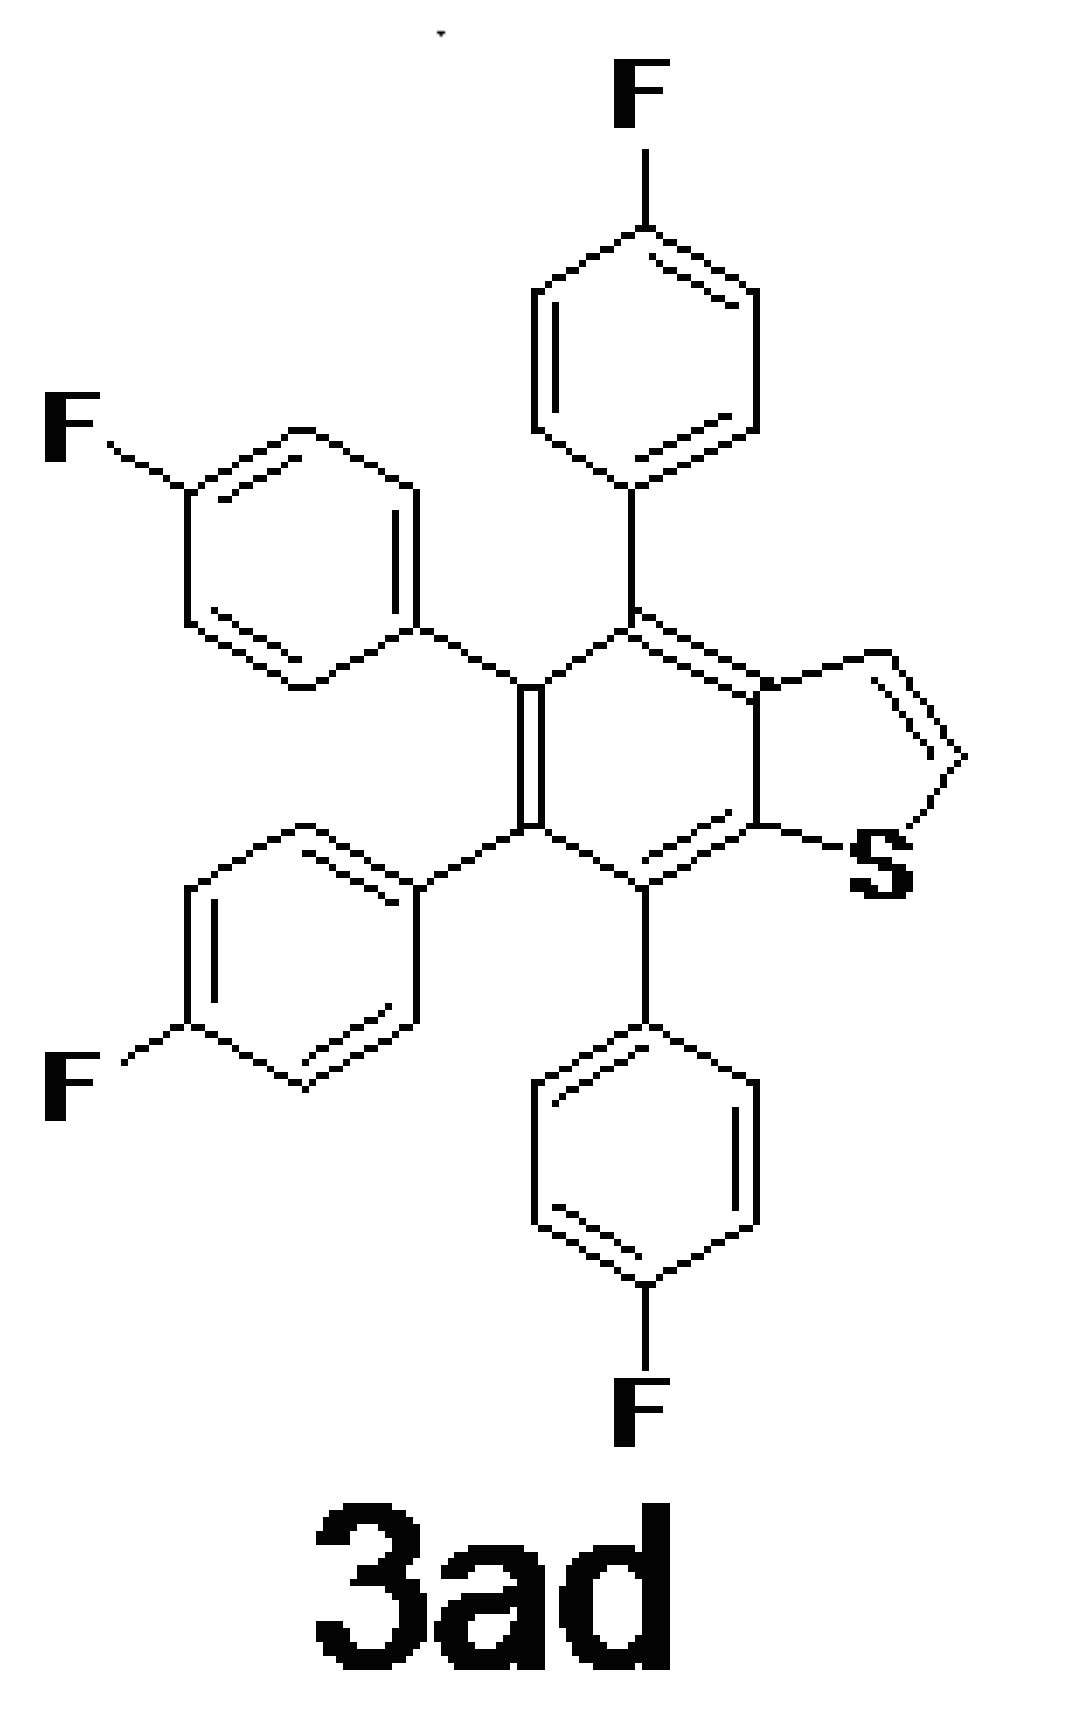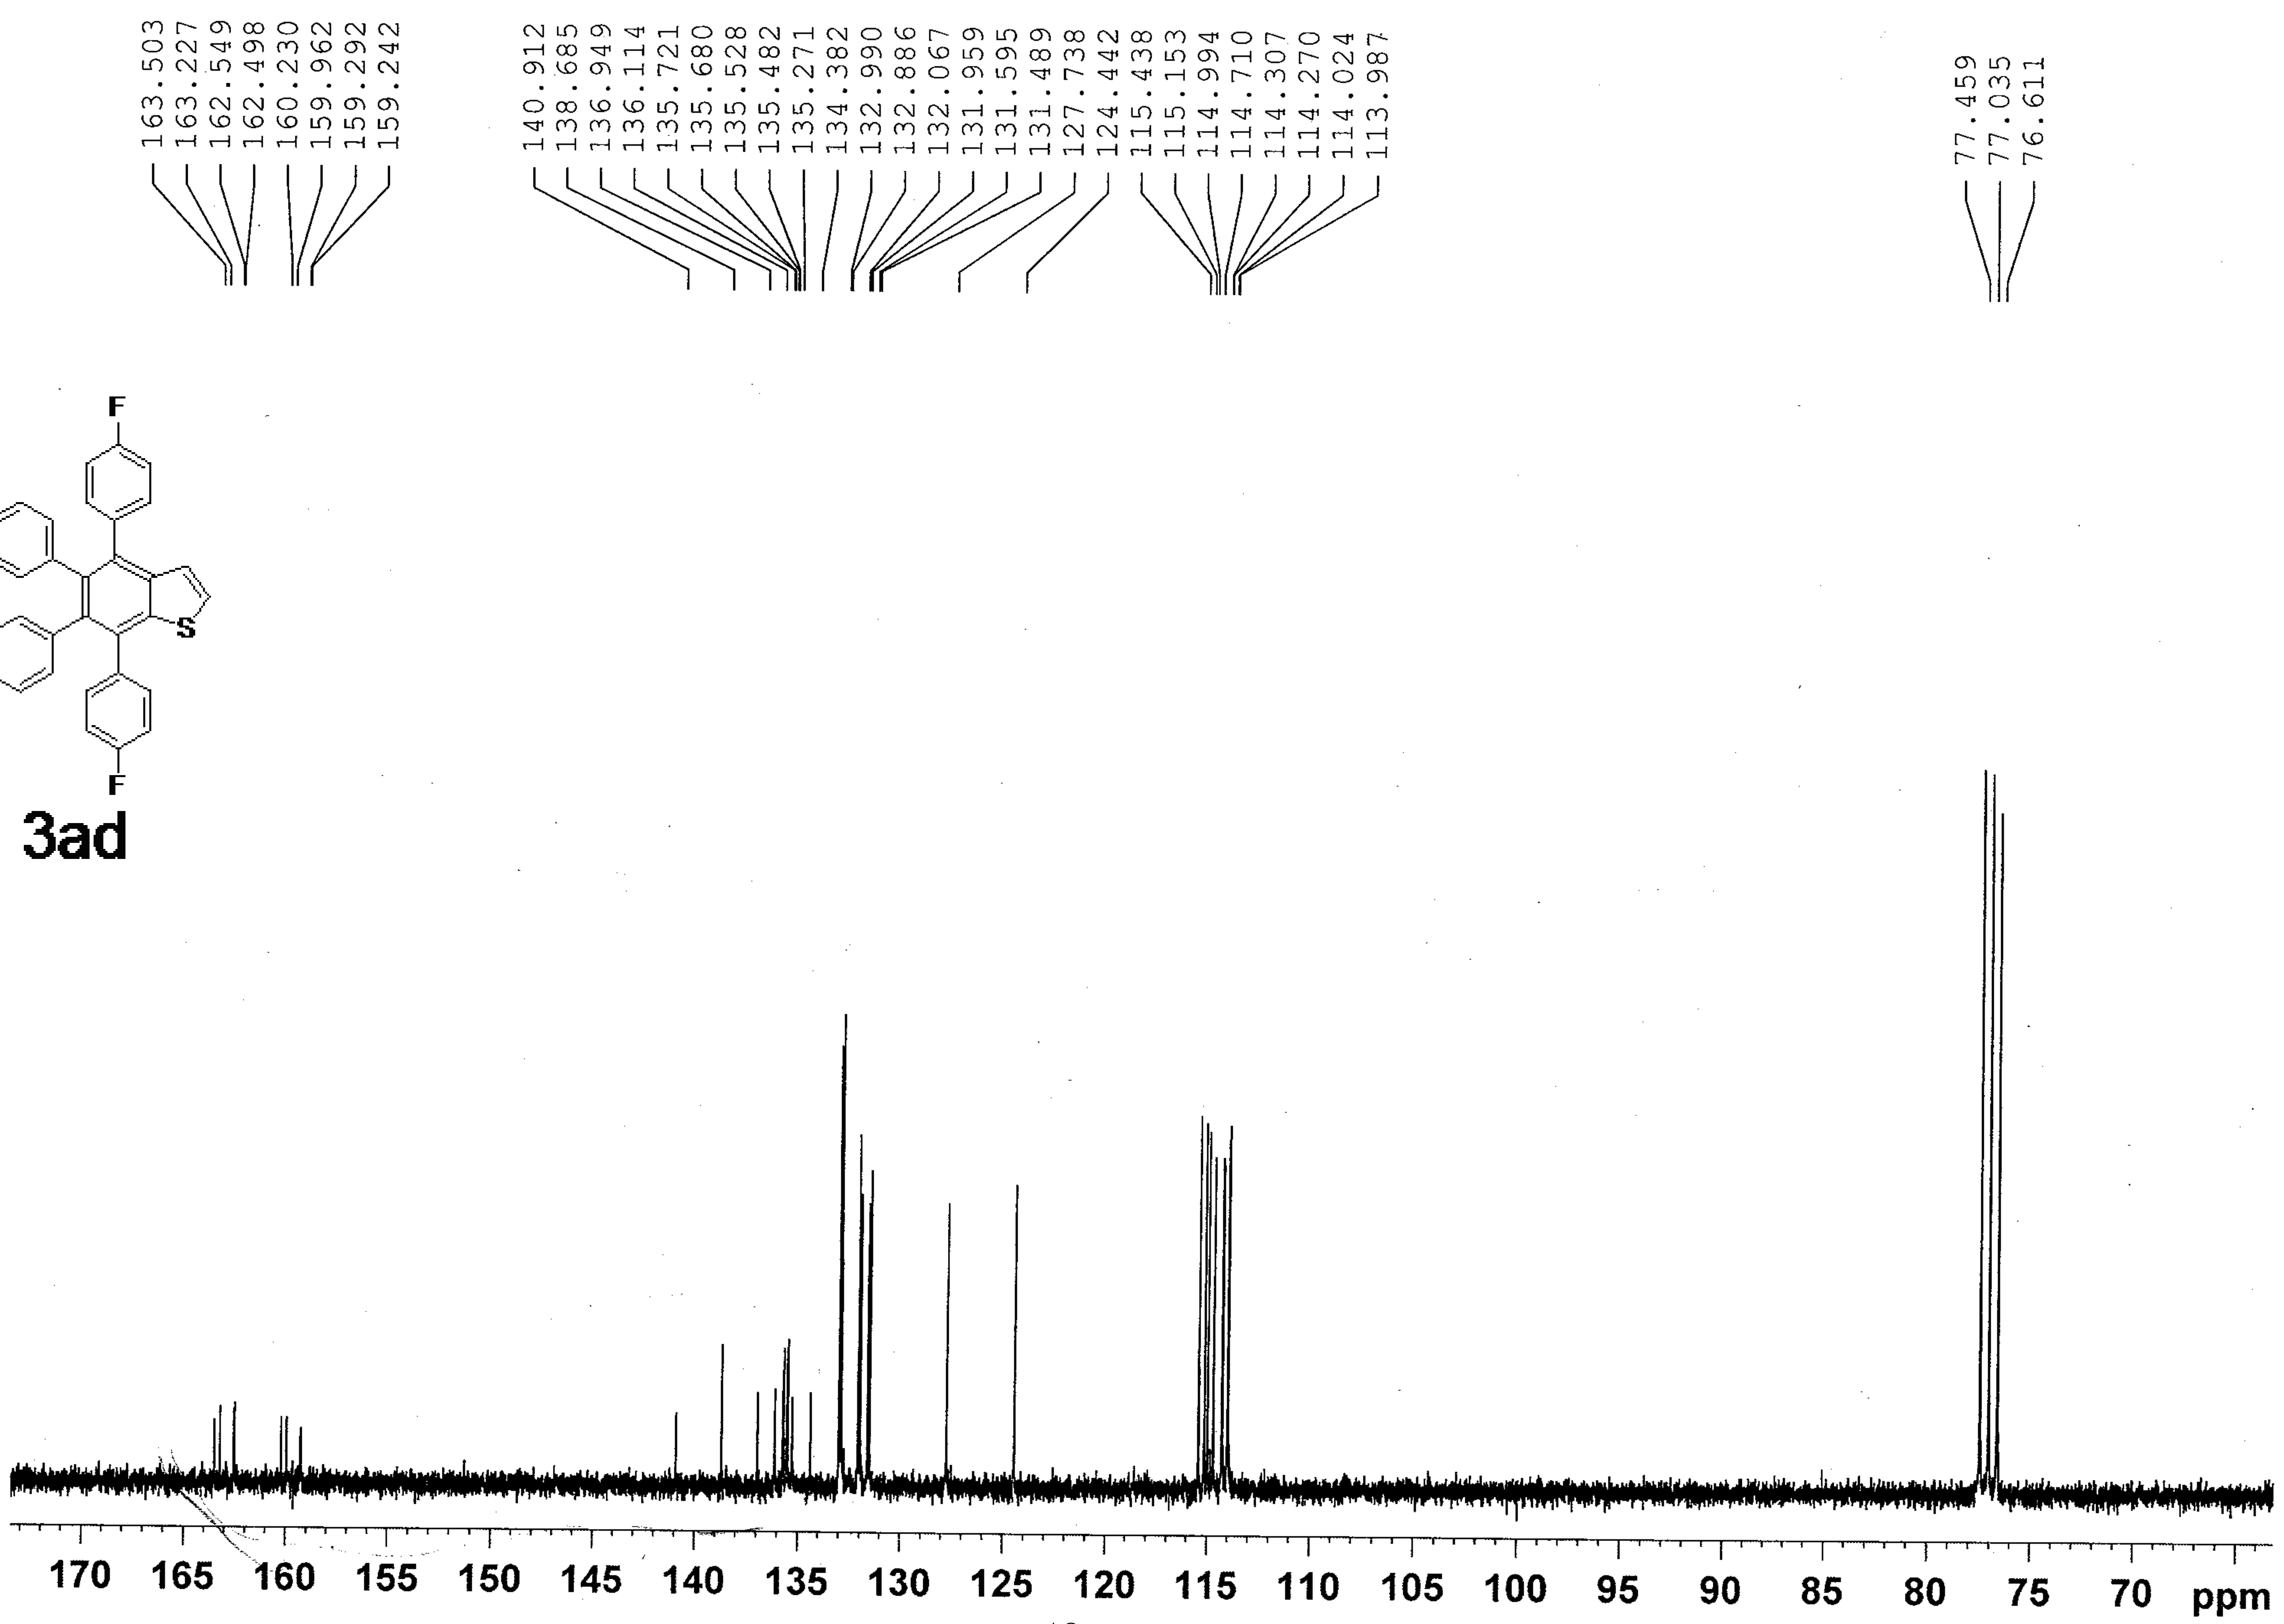

huanghn230P32

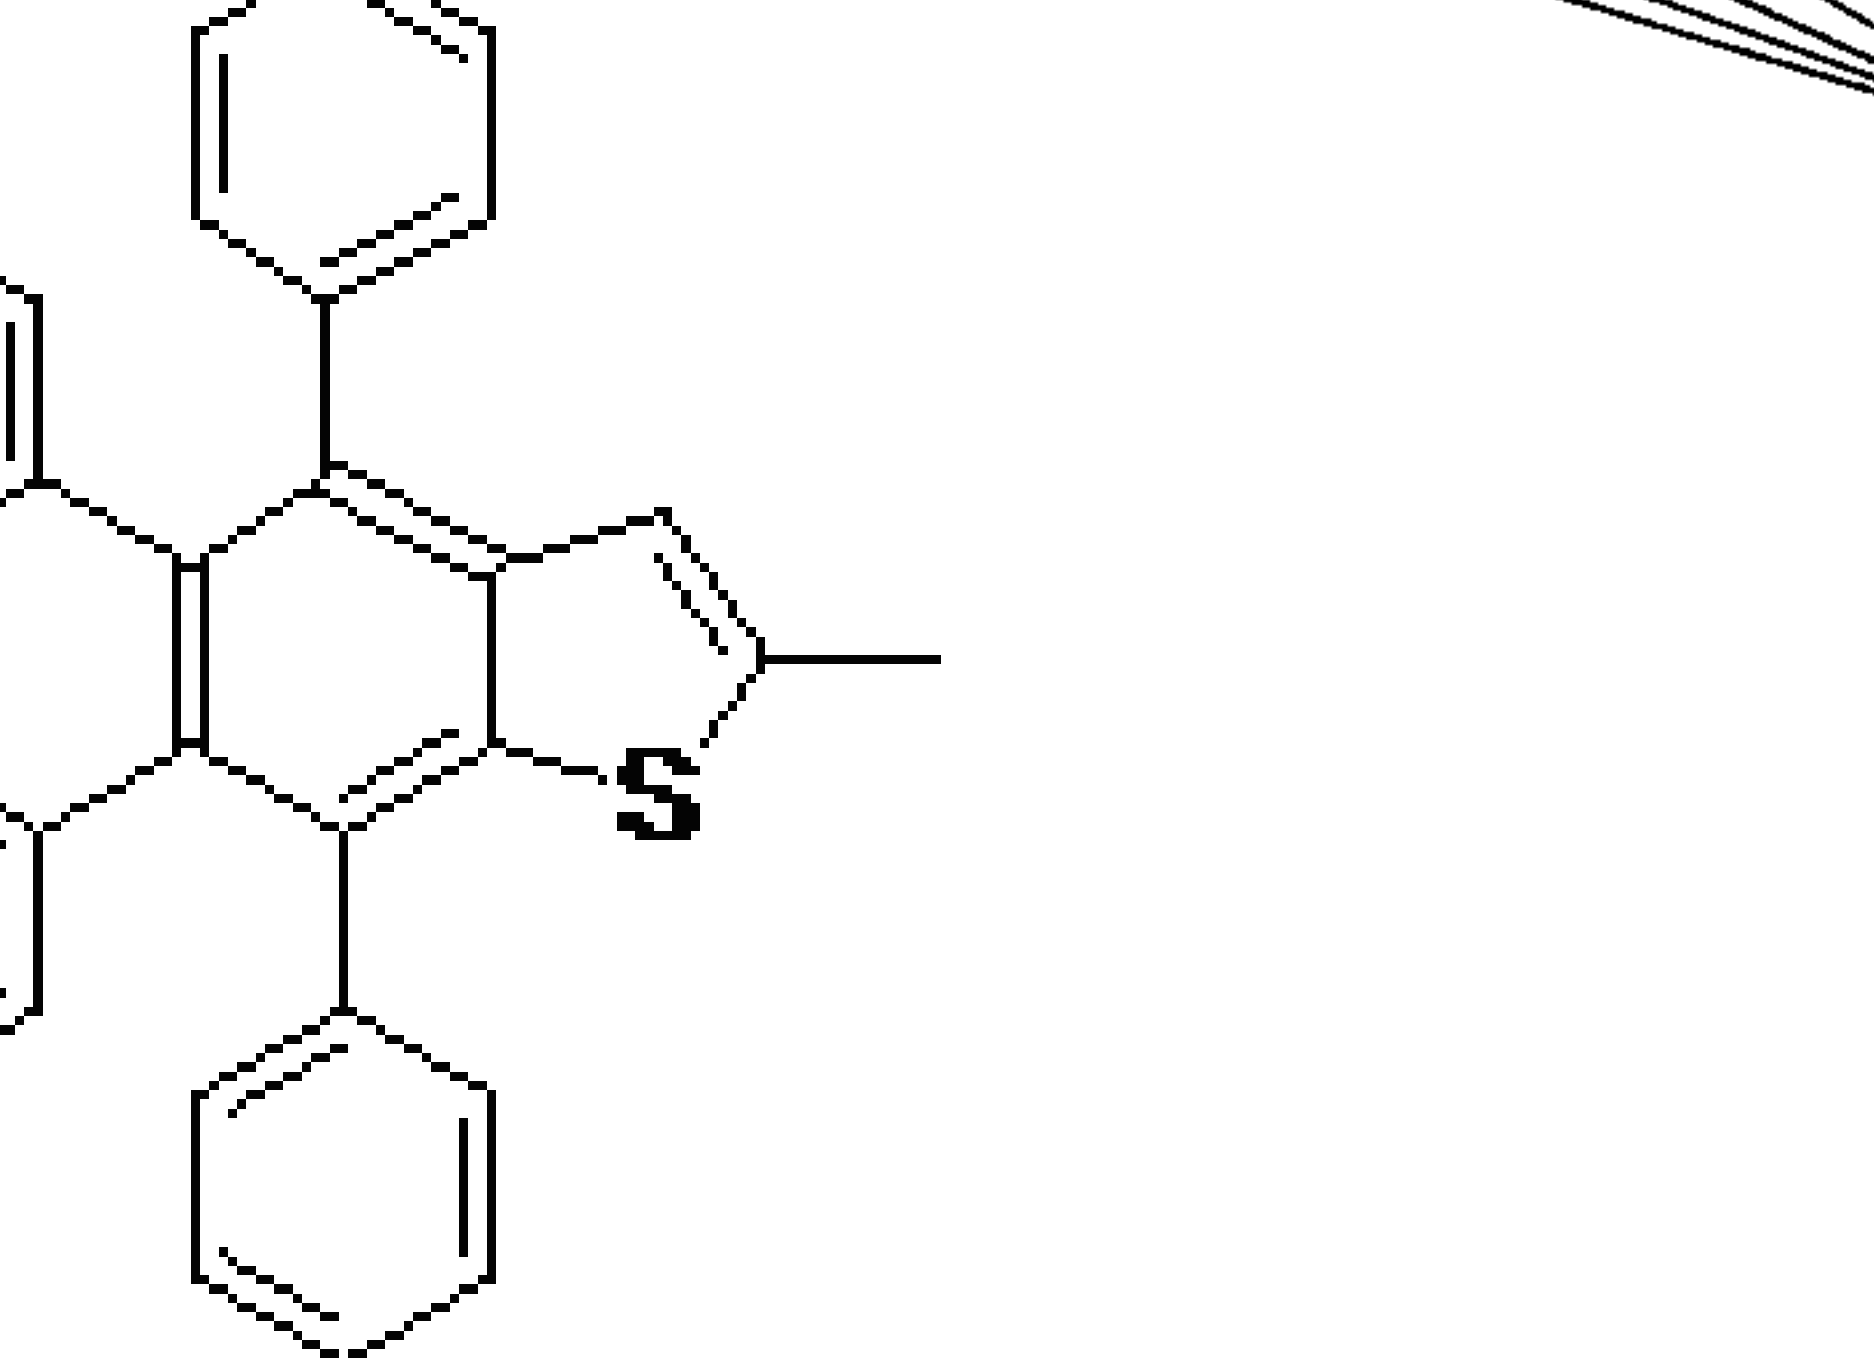

**3ca**

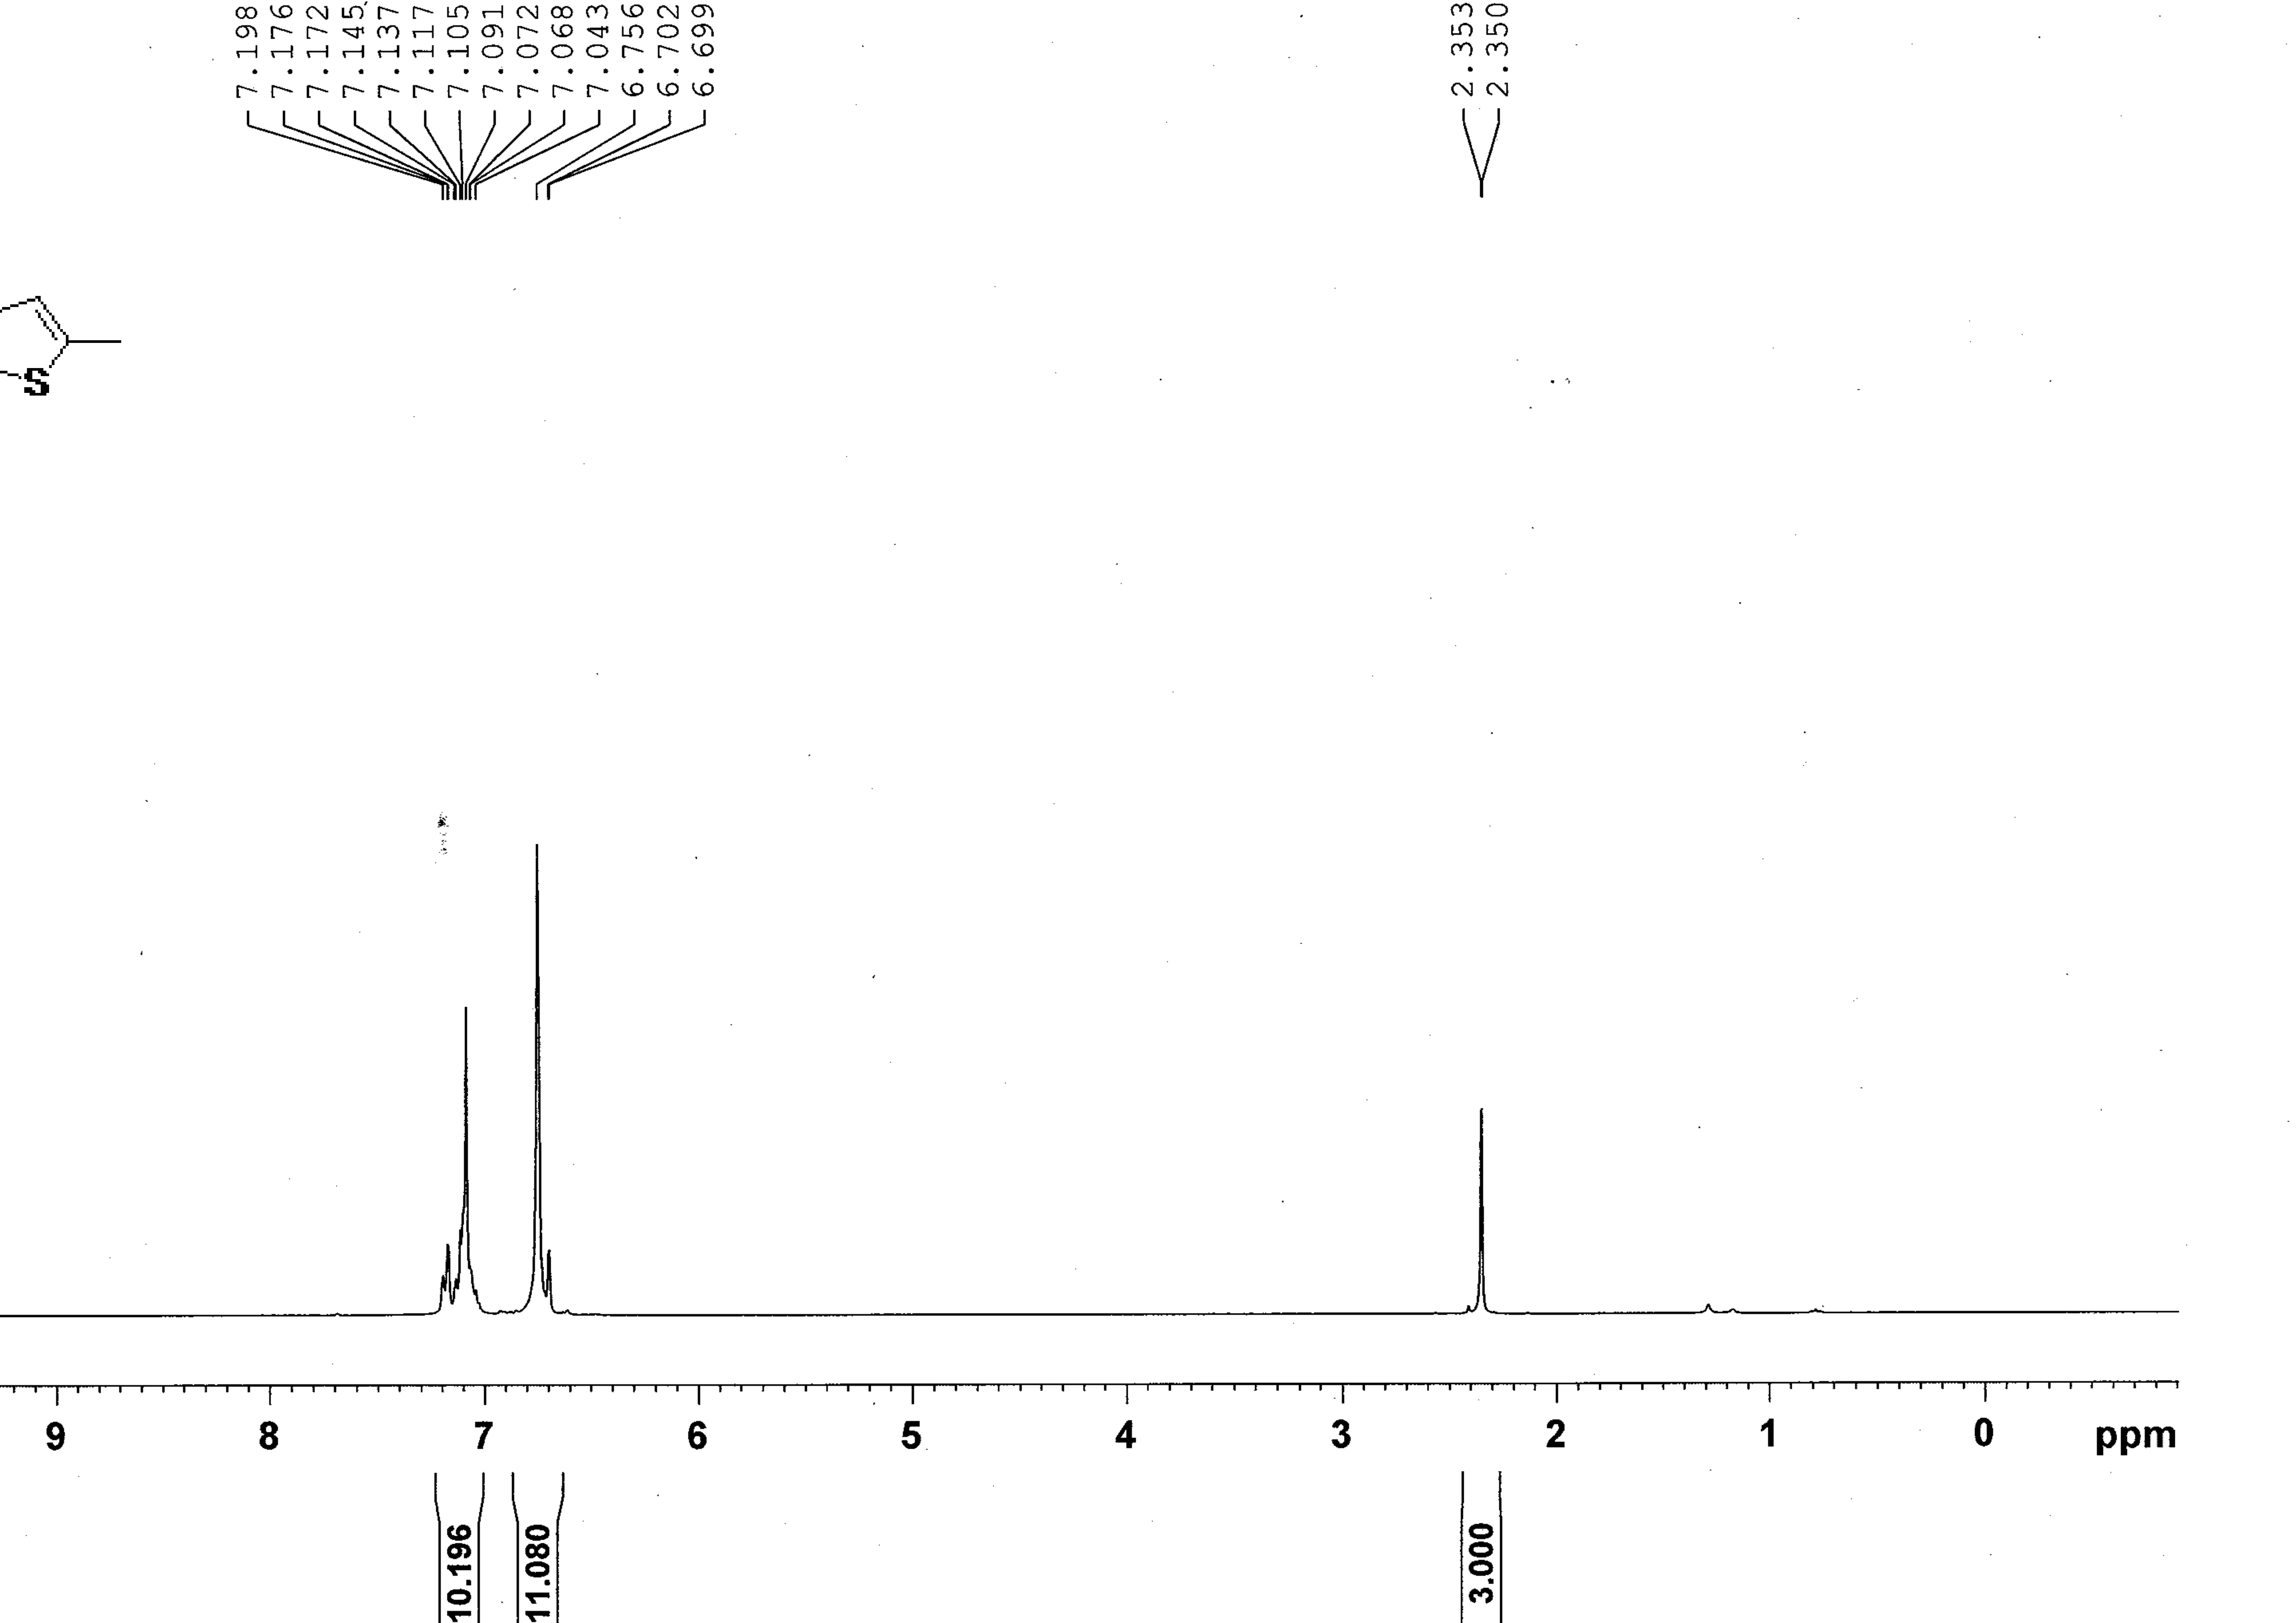

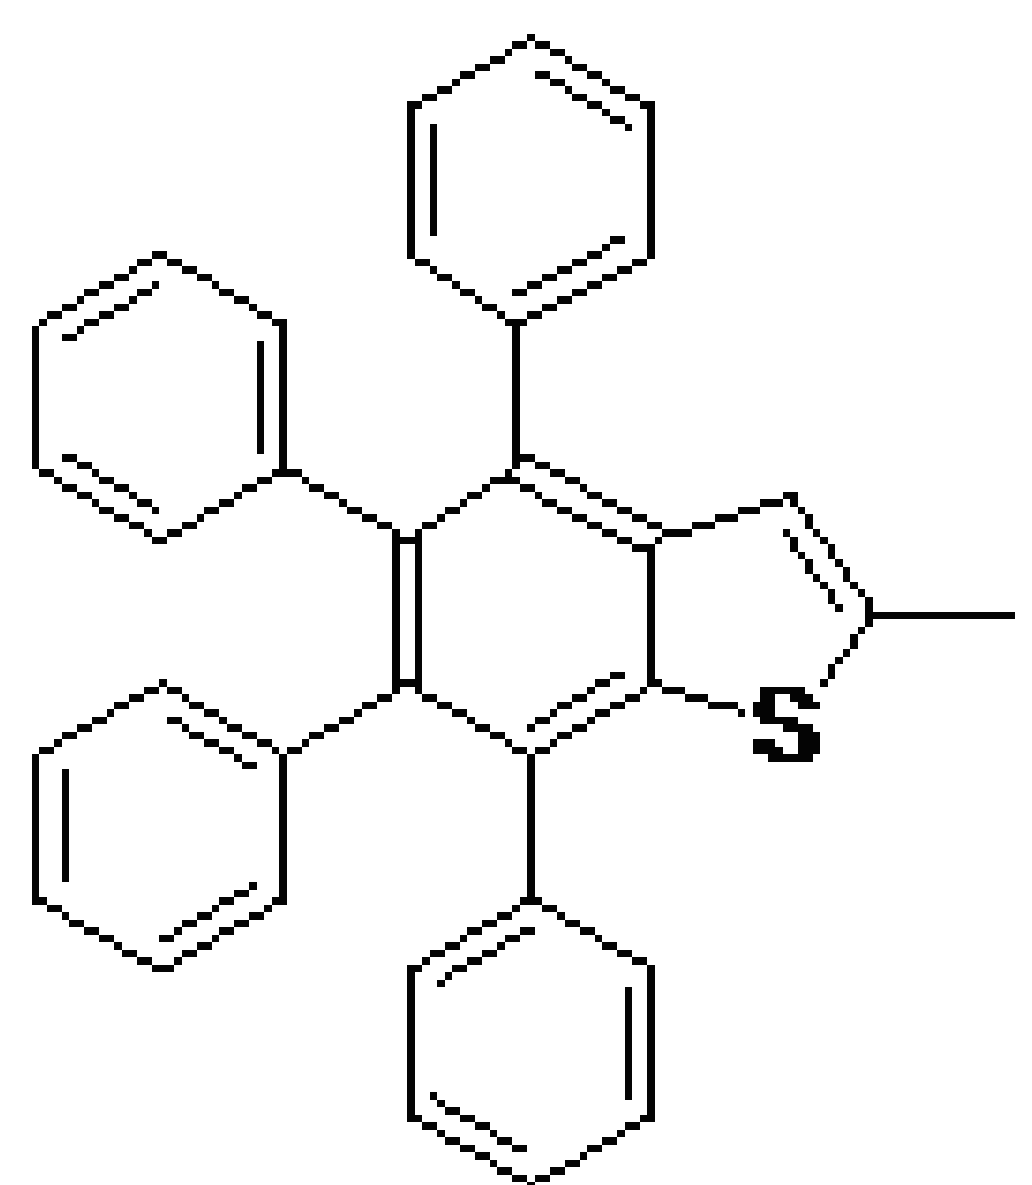

**3ca**

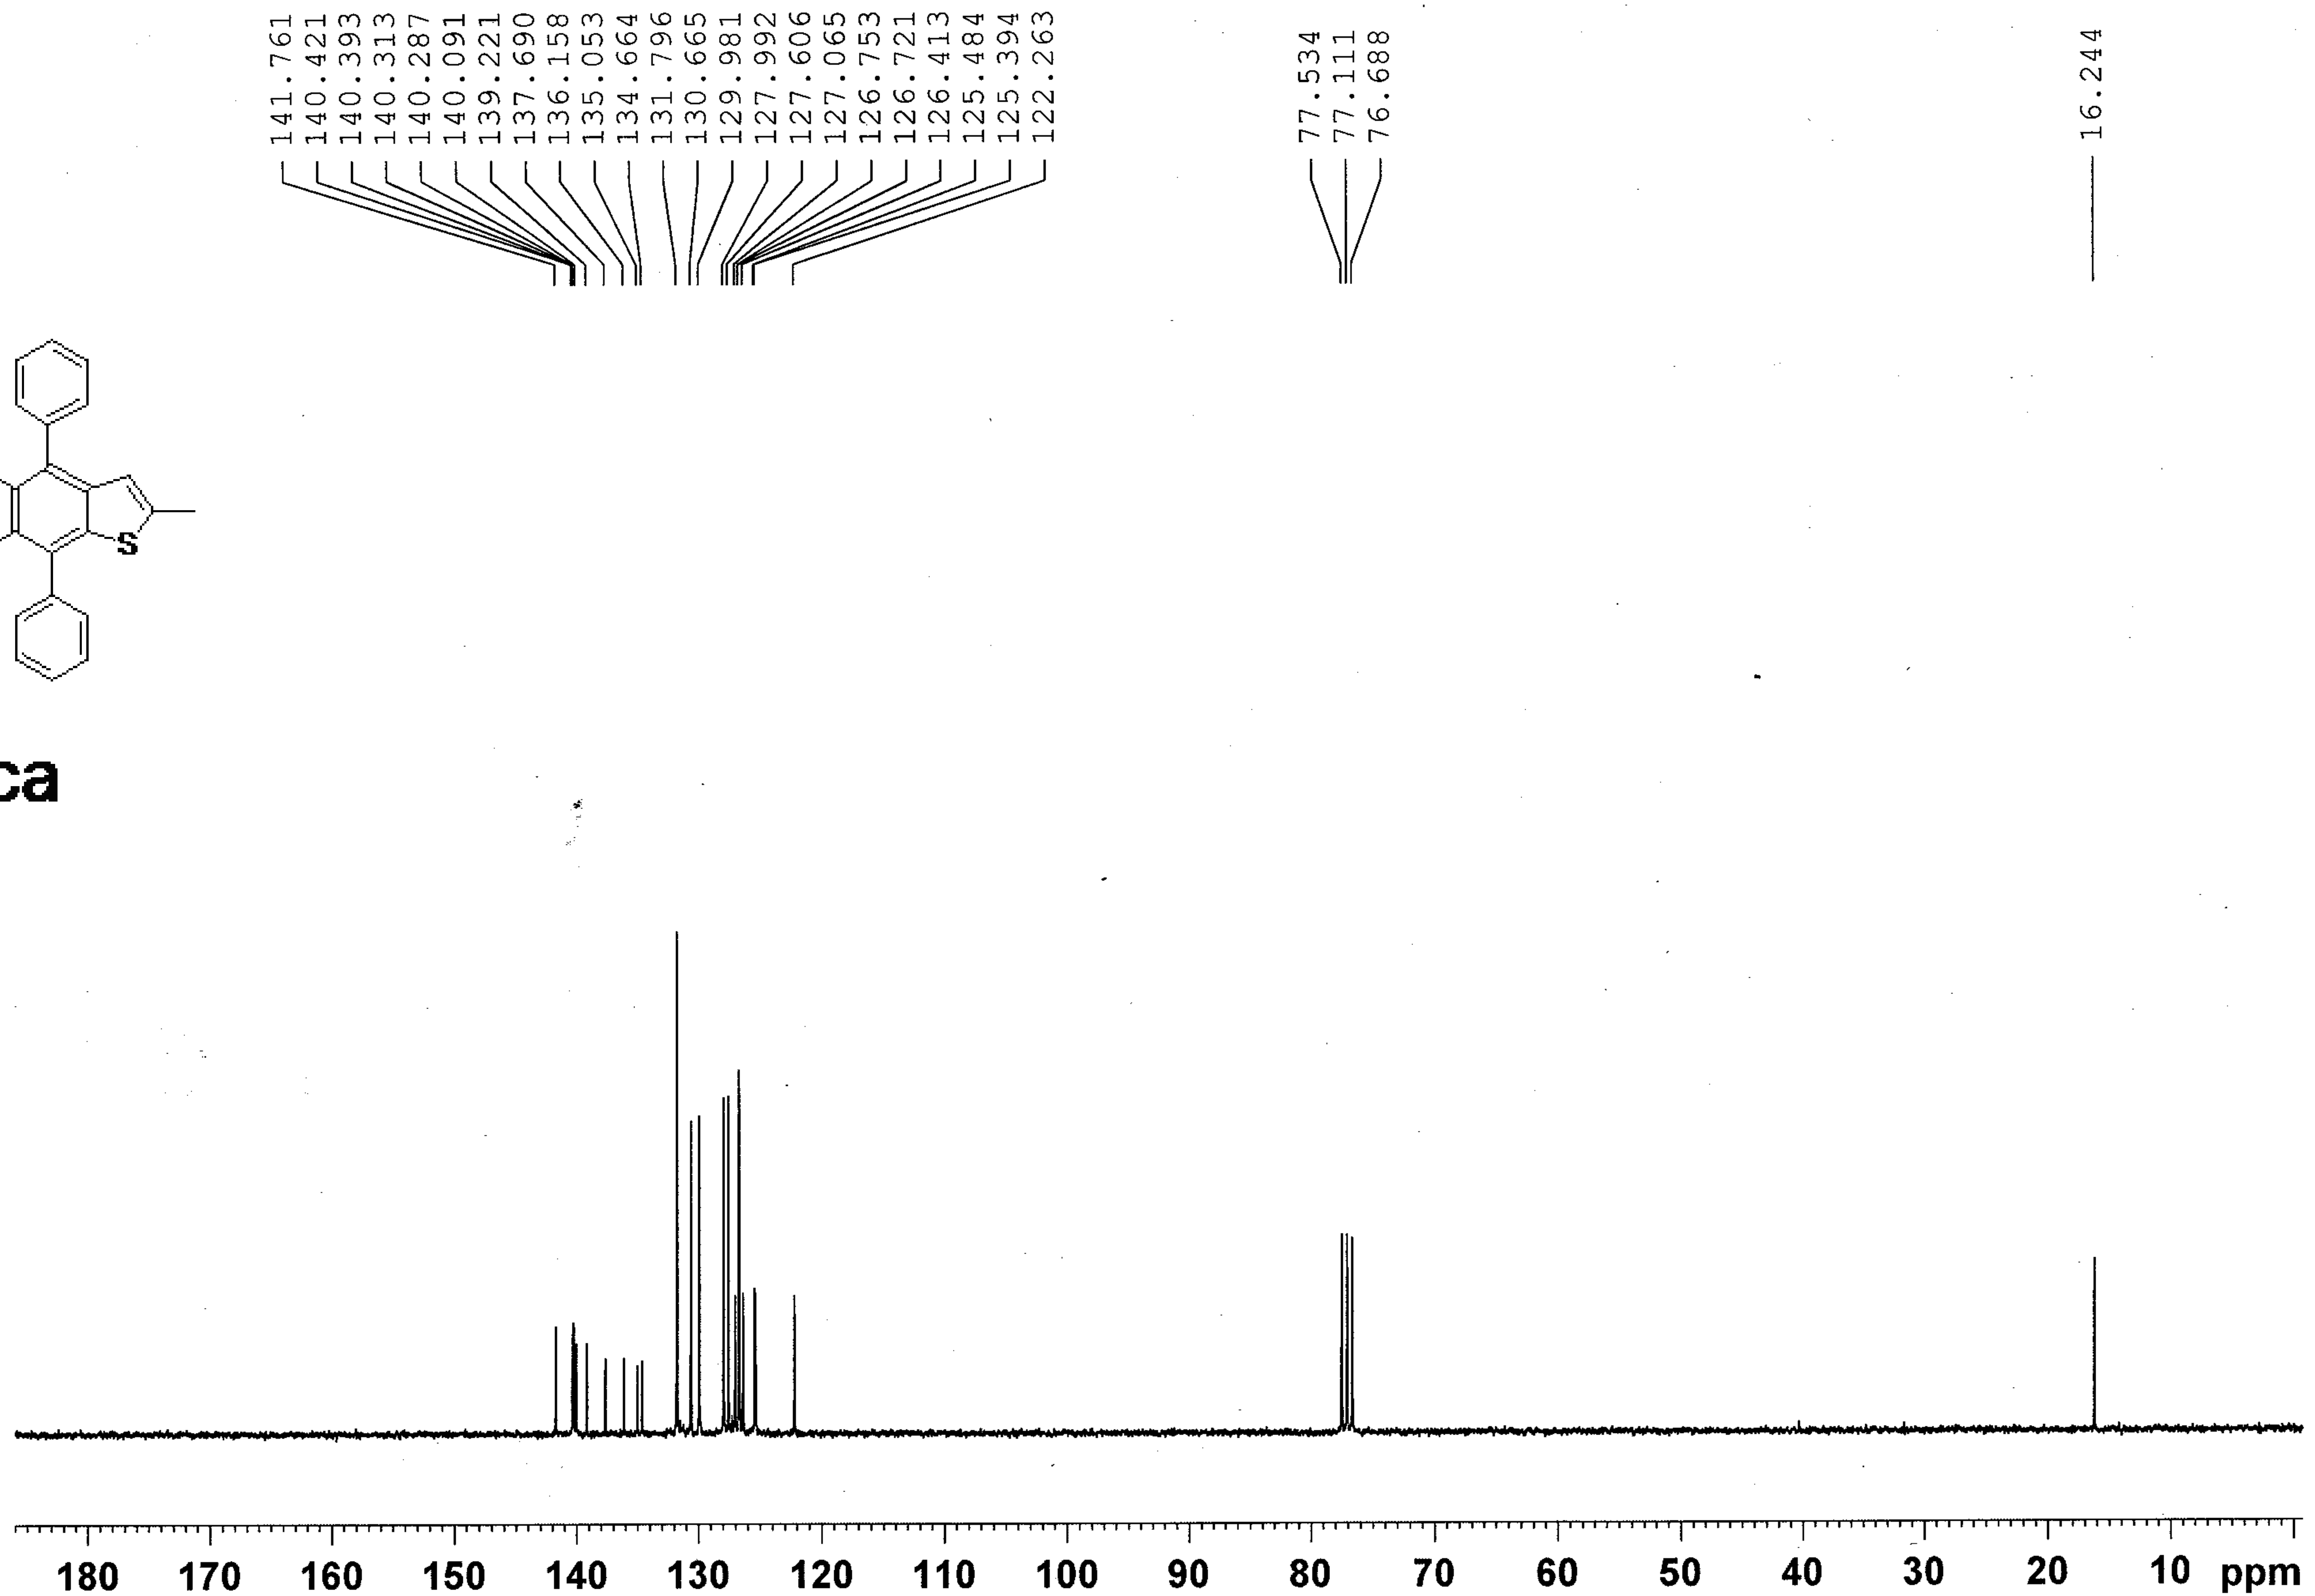

huanghn246 p2

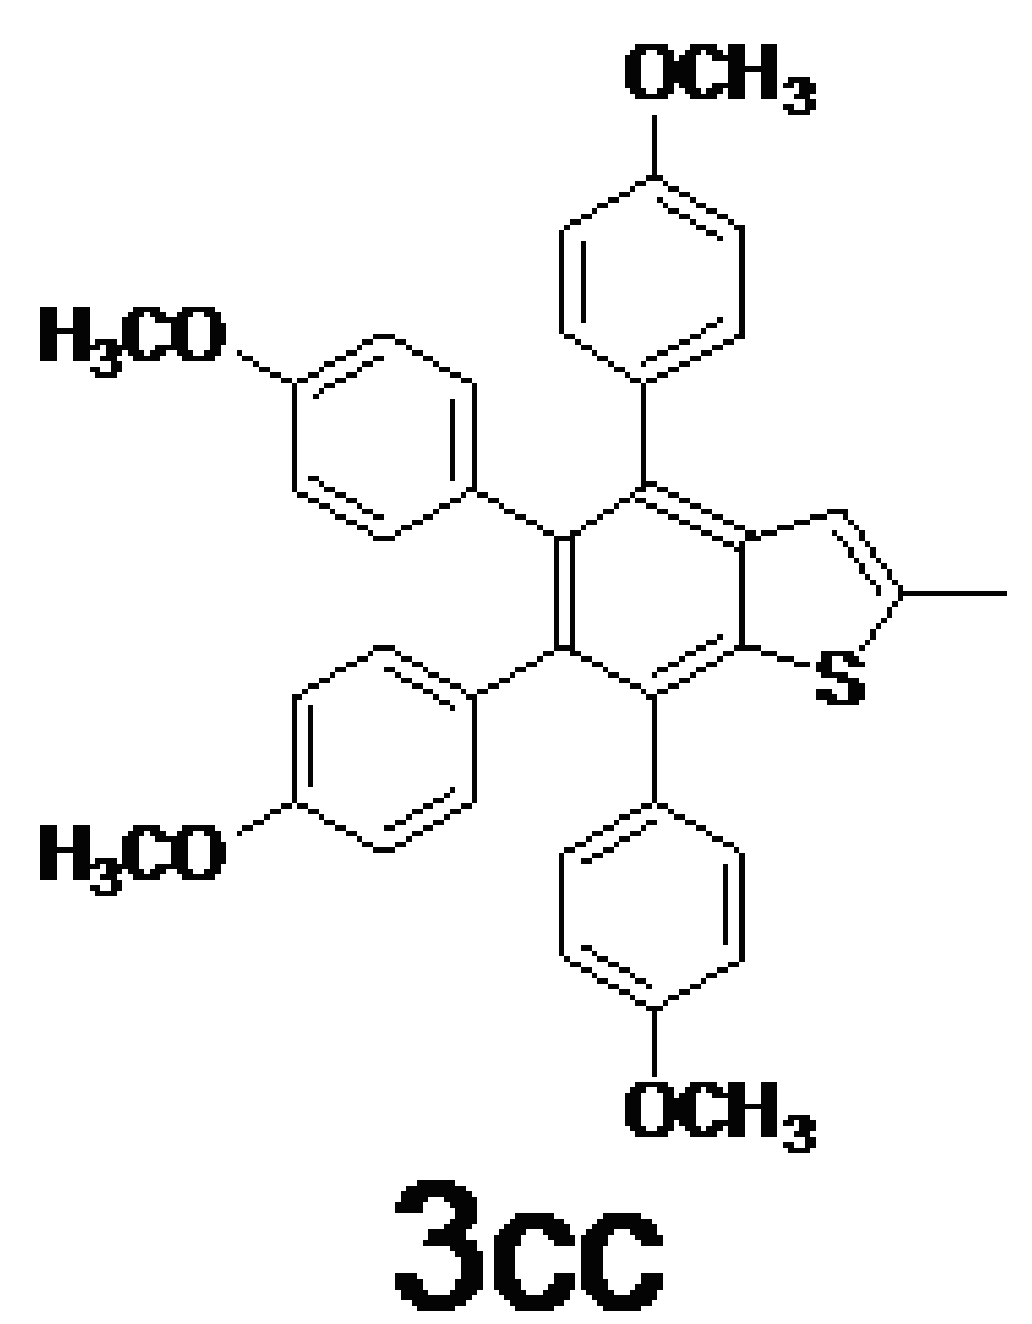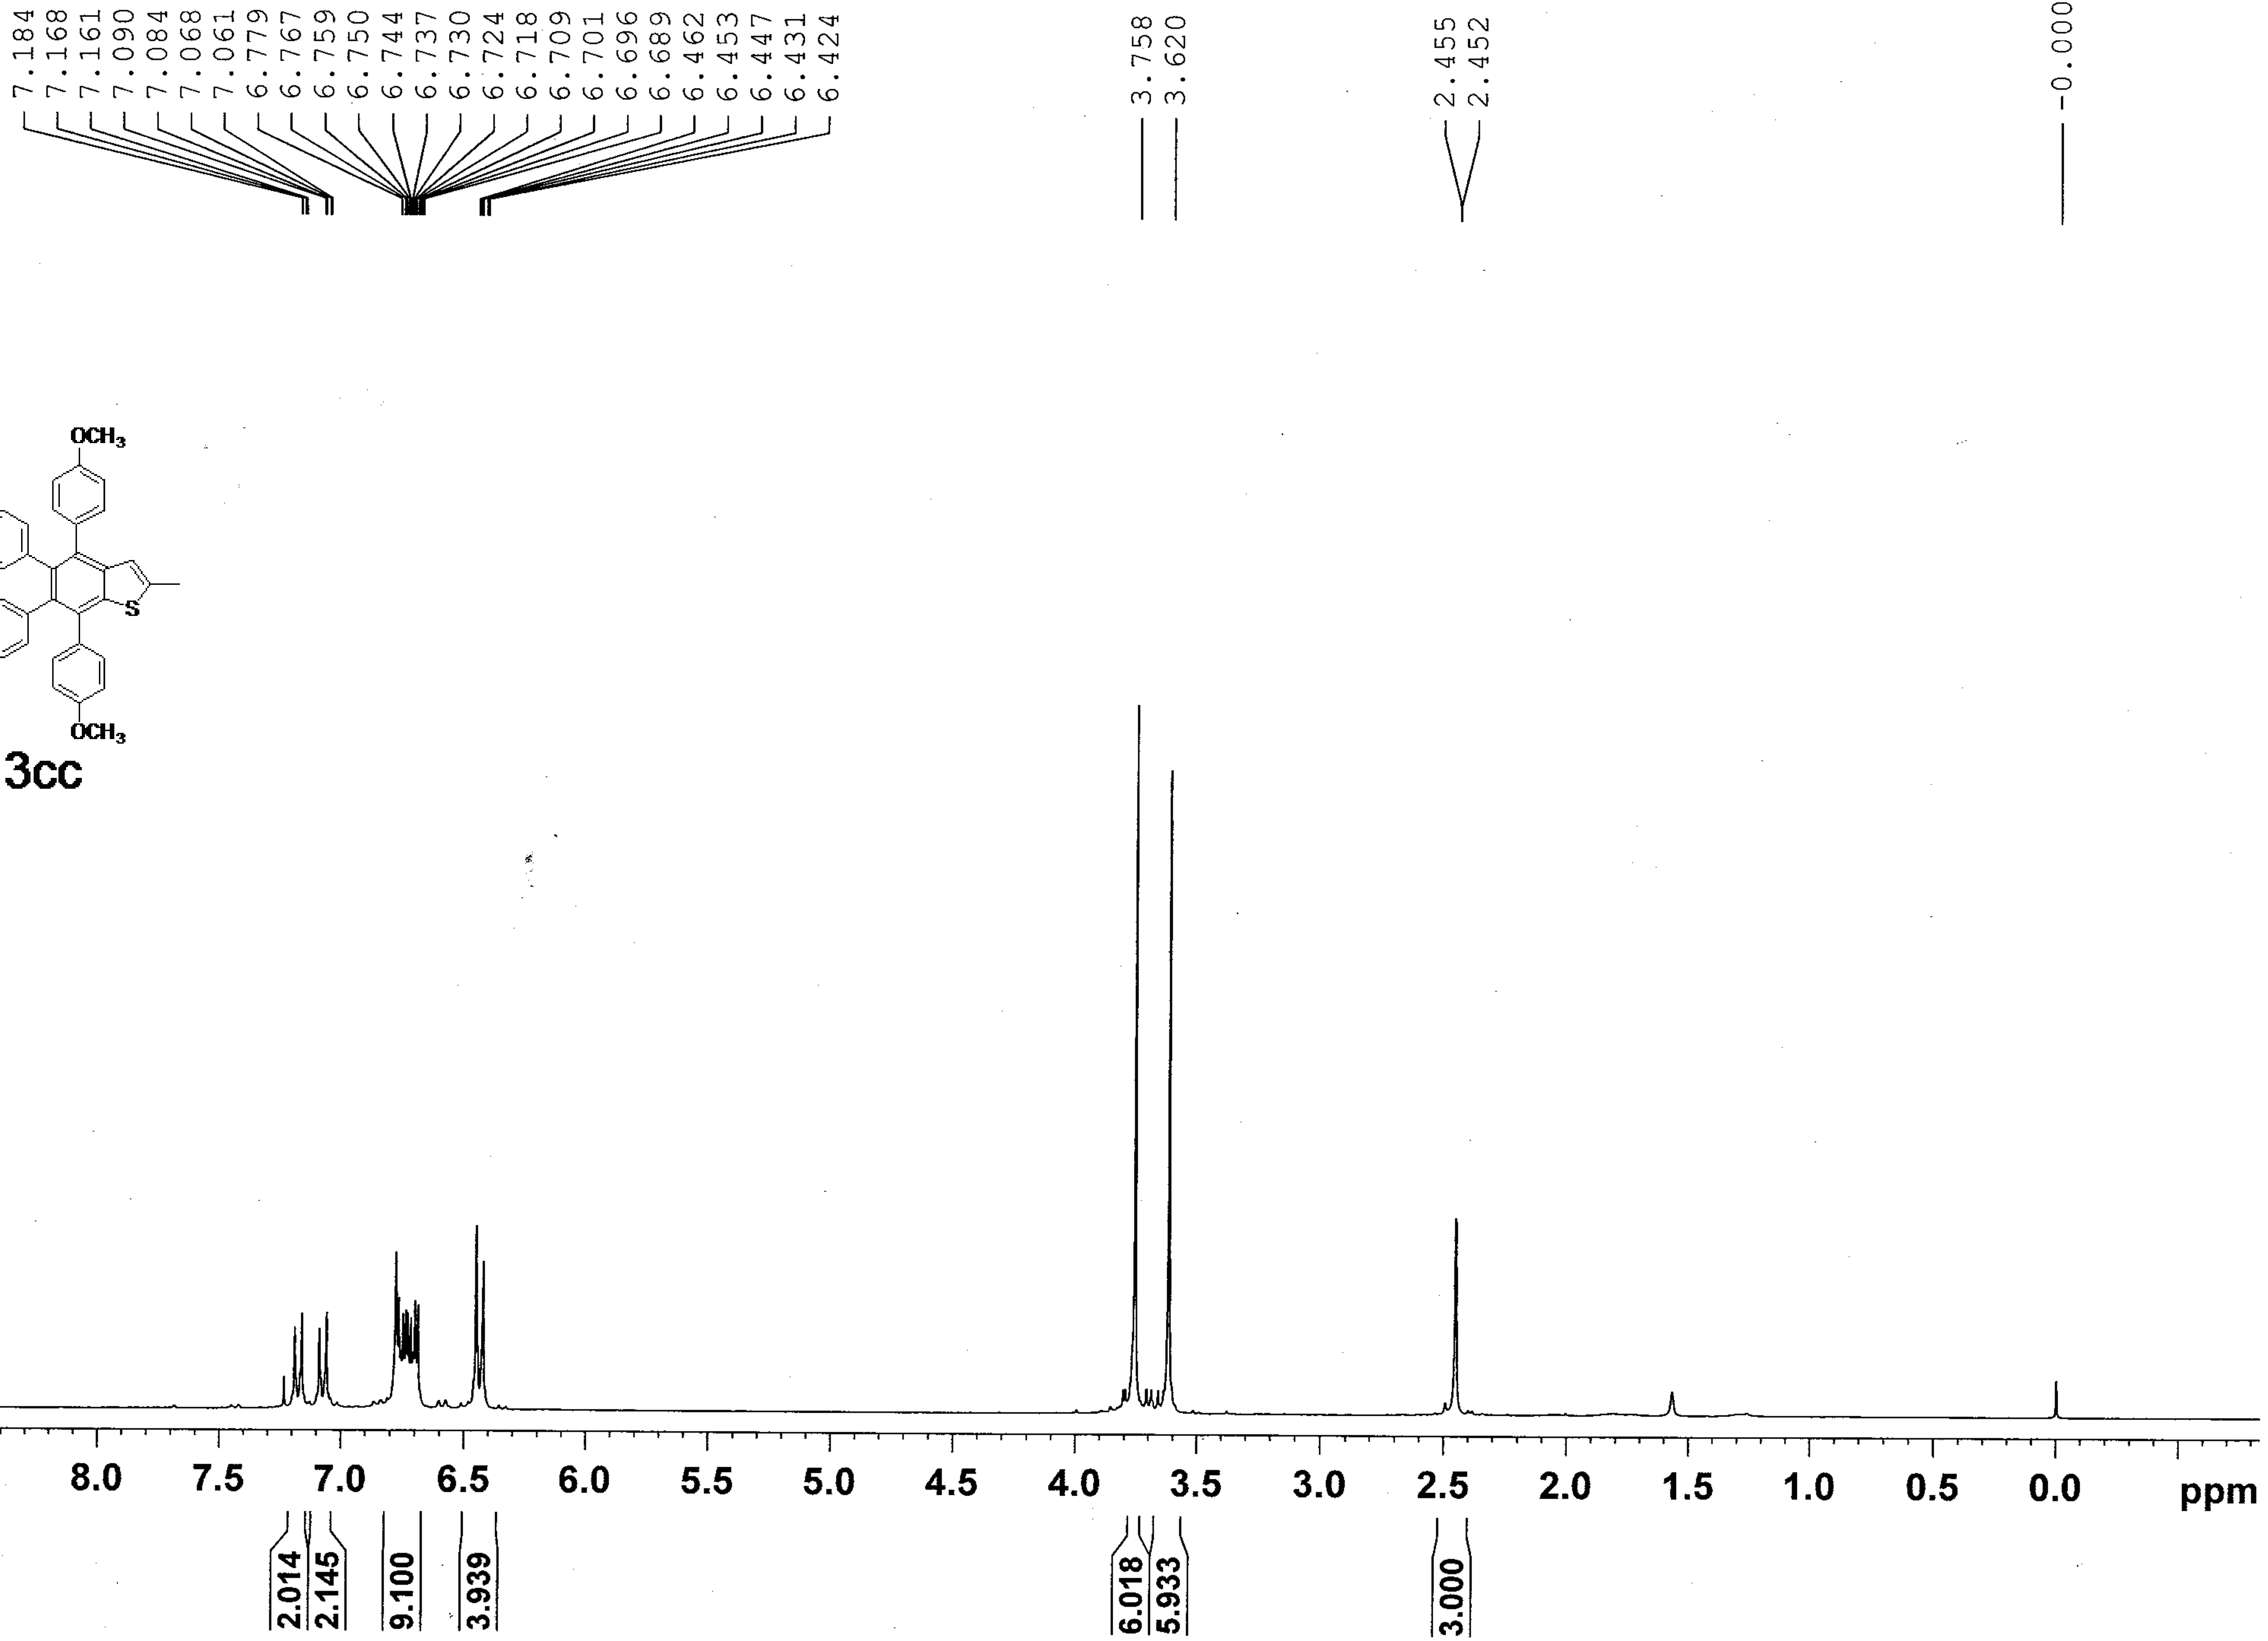

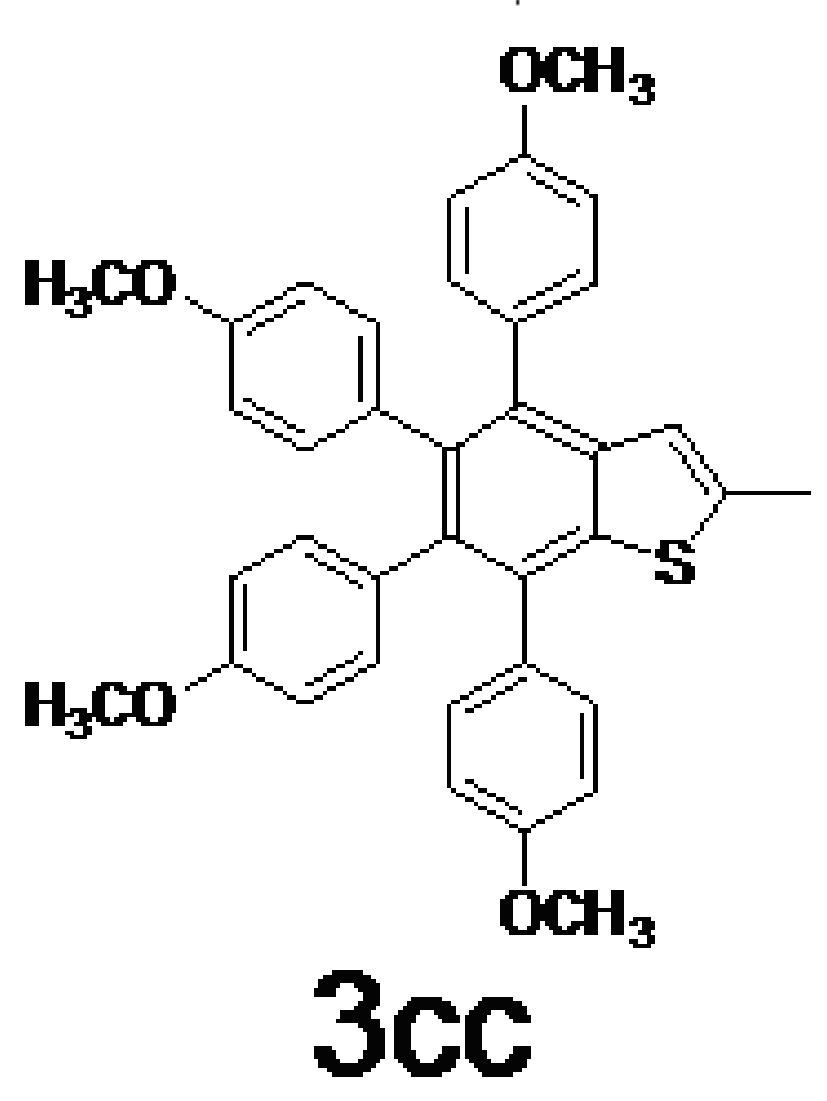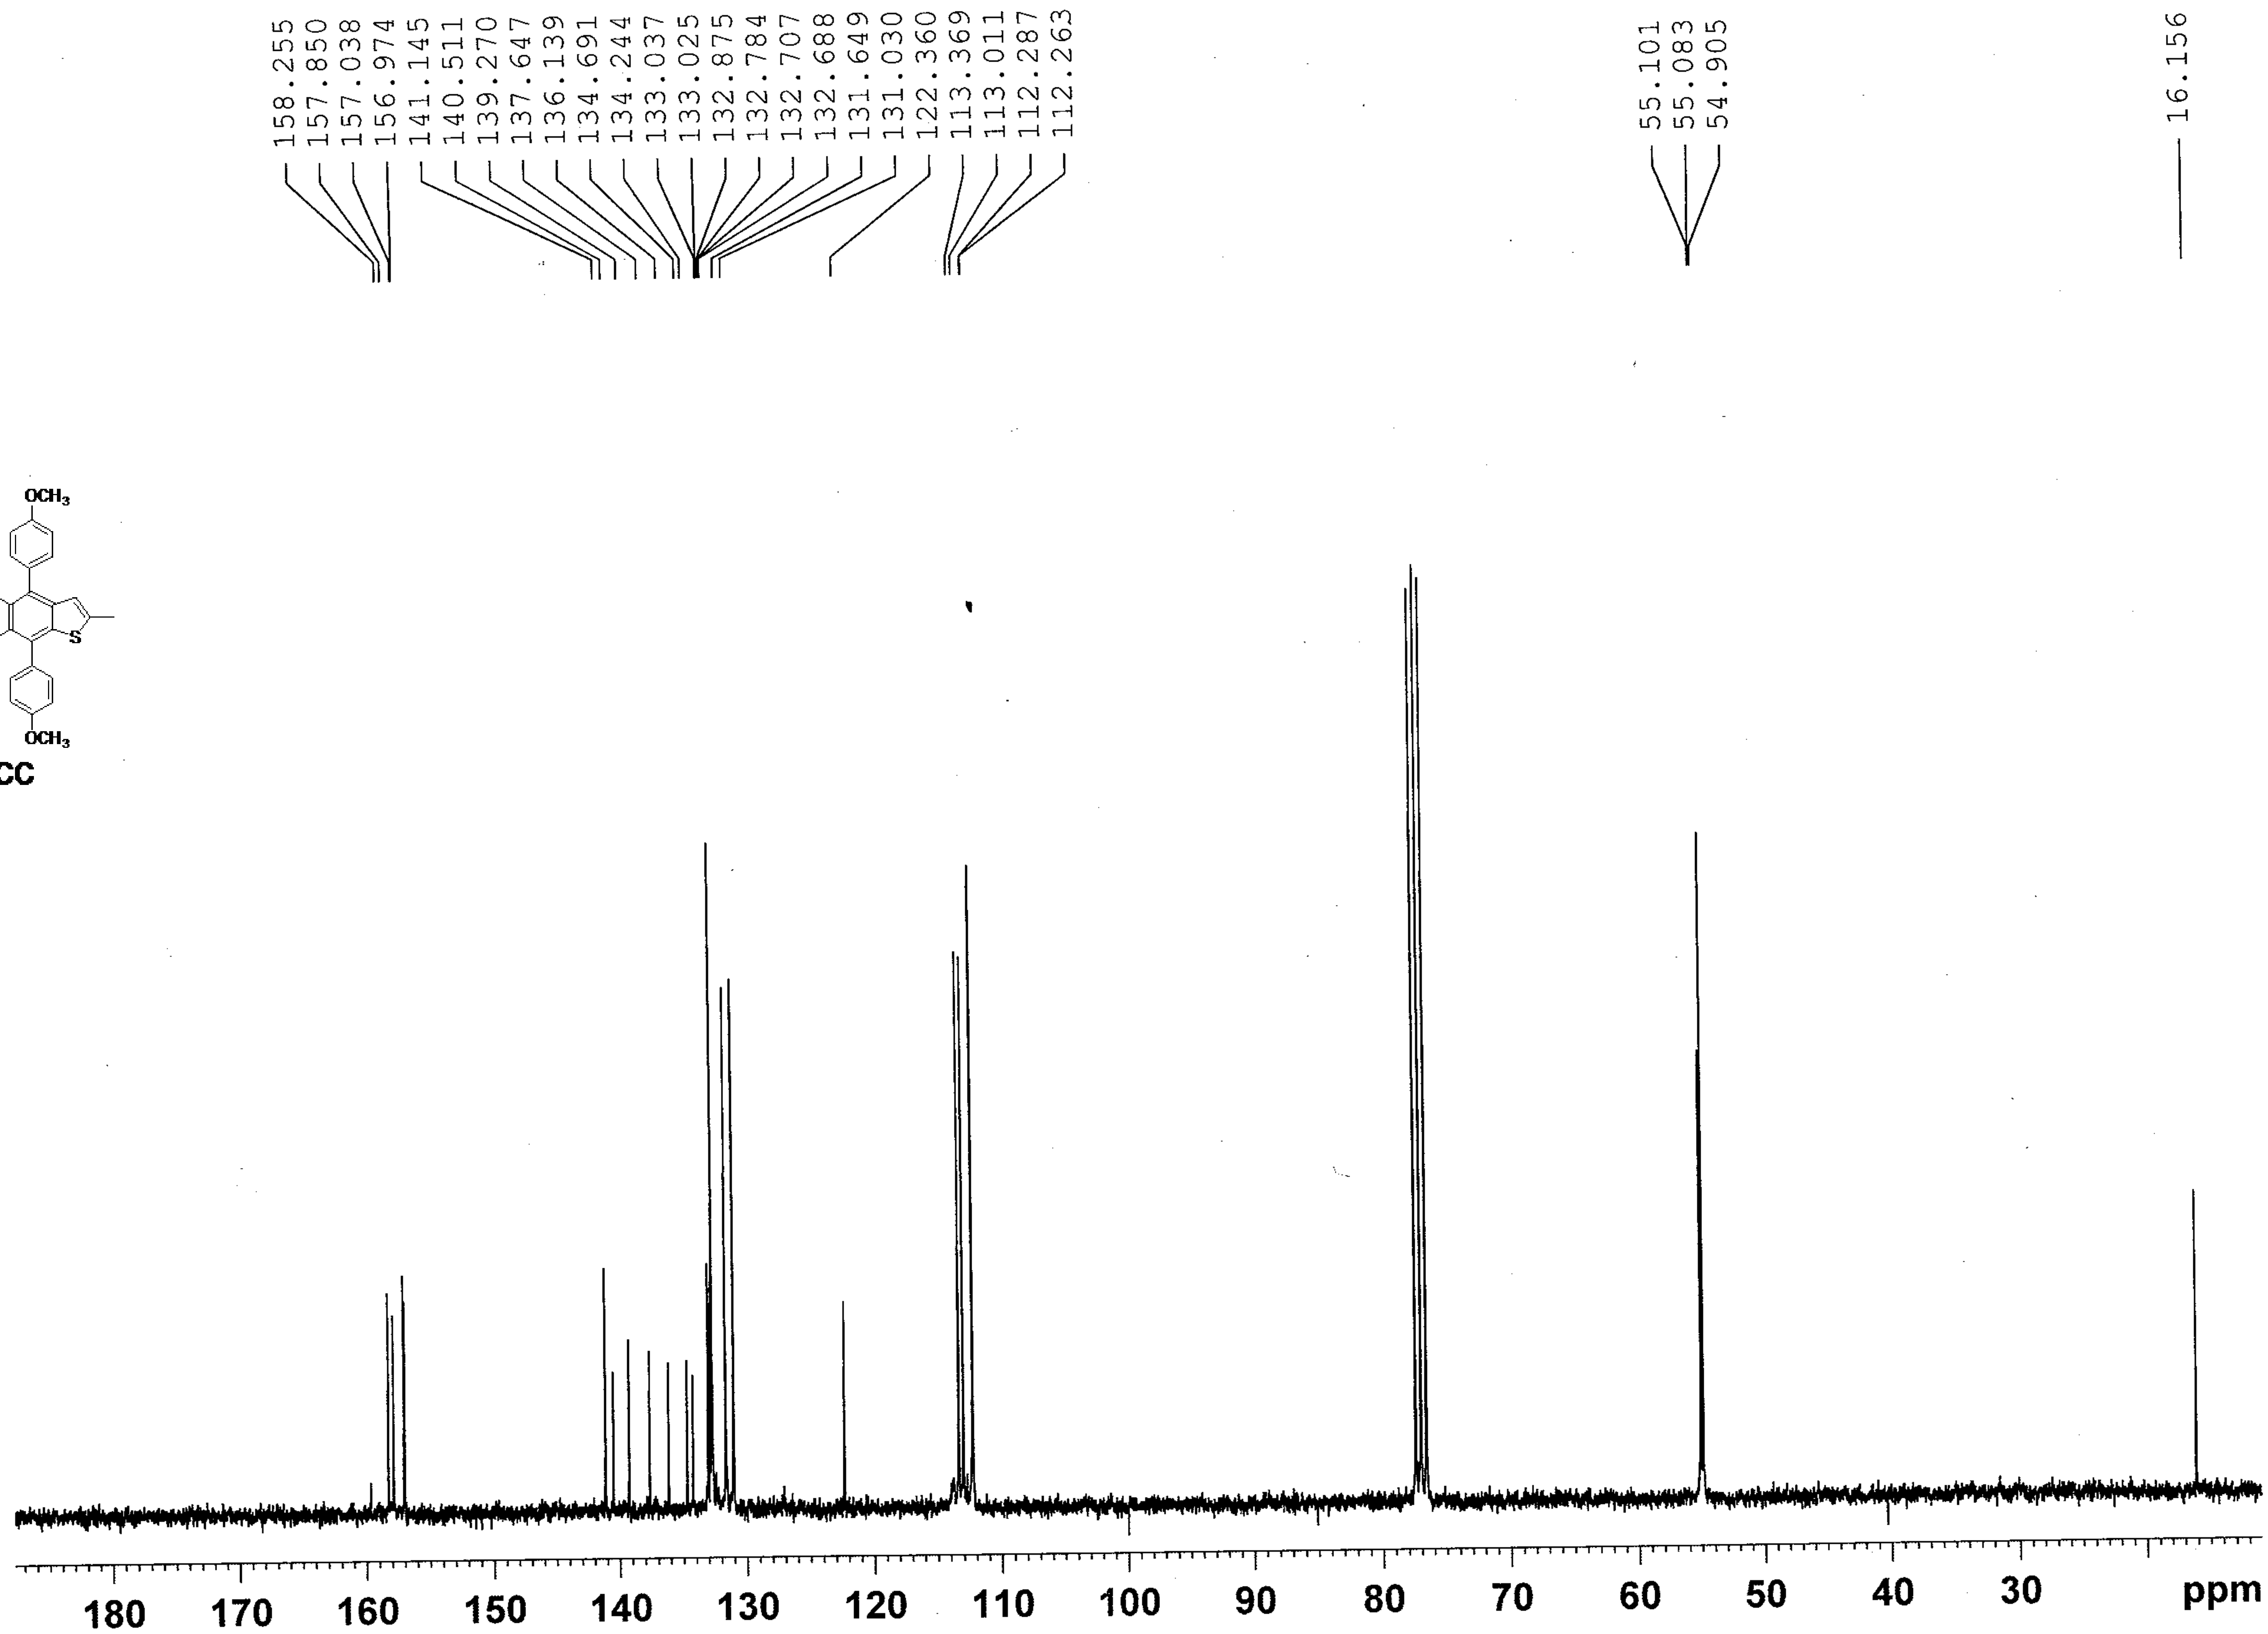

huanghn231P32

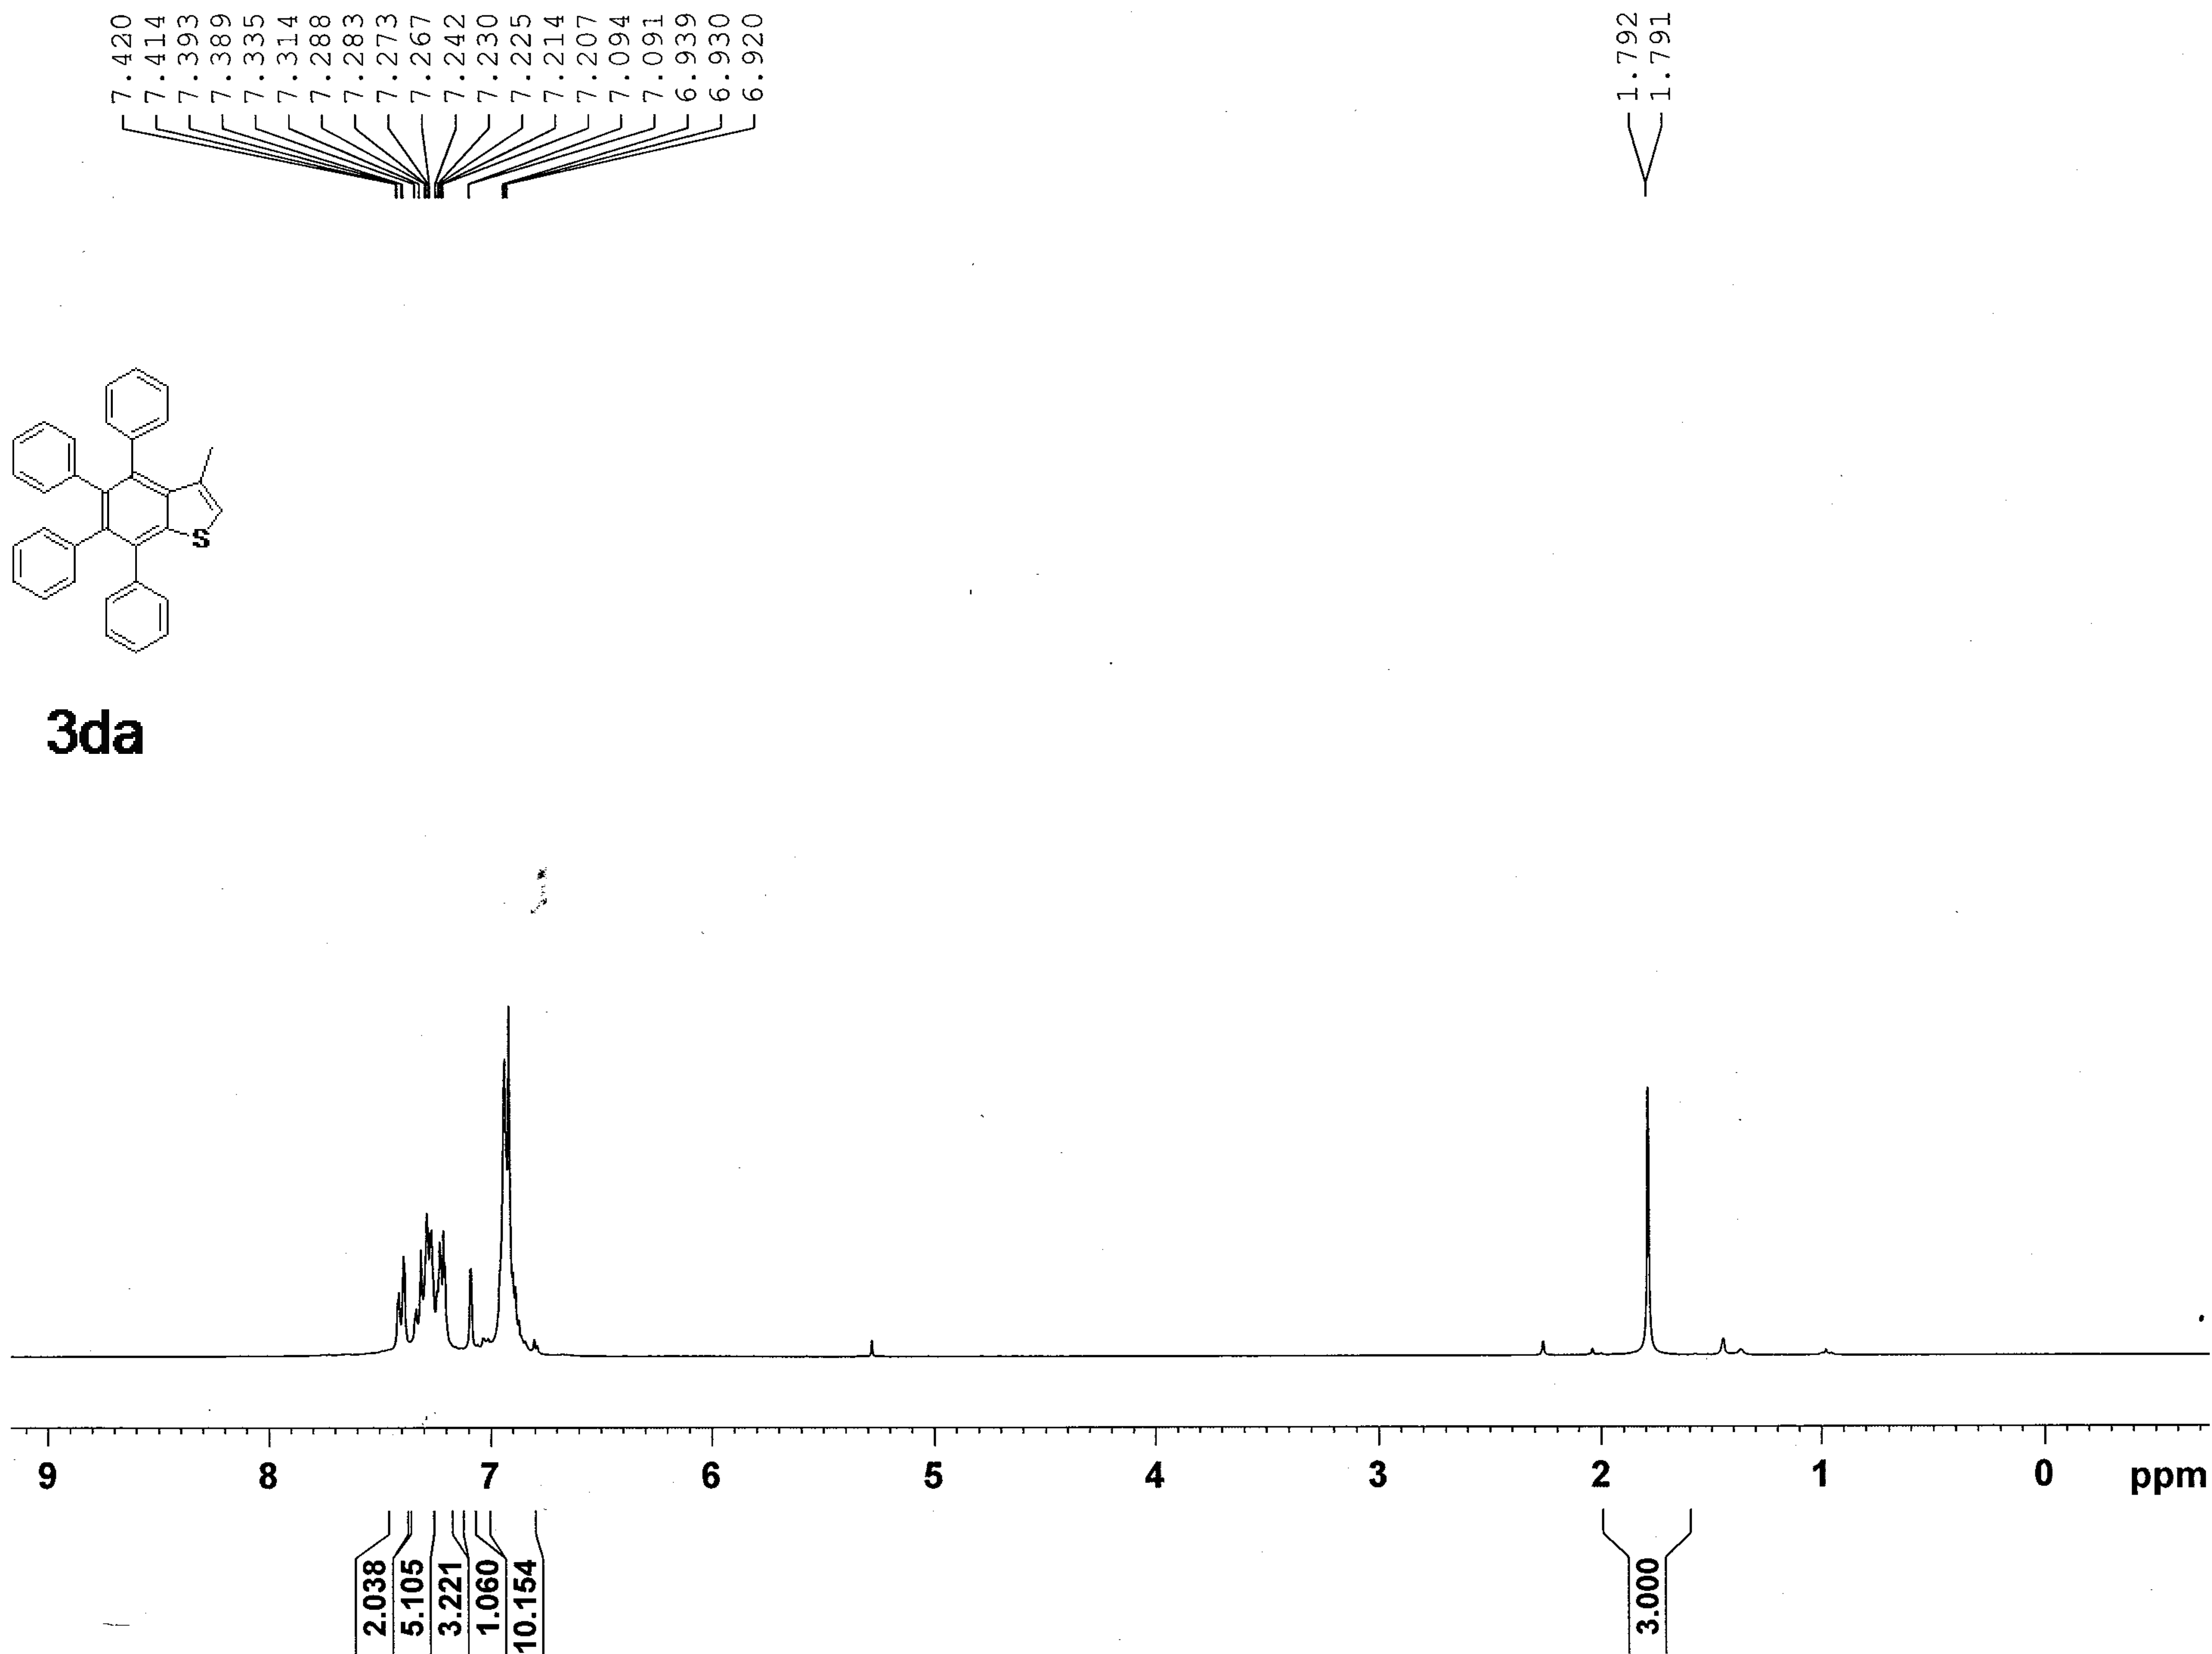

huanghn231P32 C13CPD

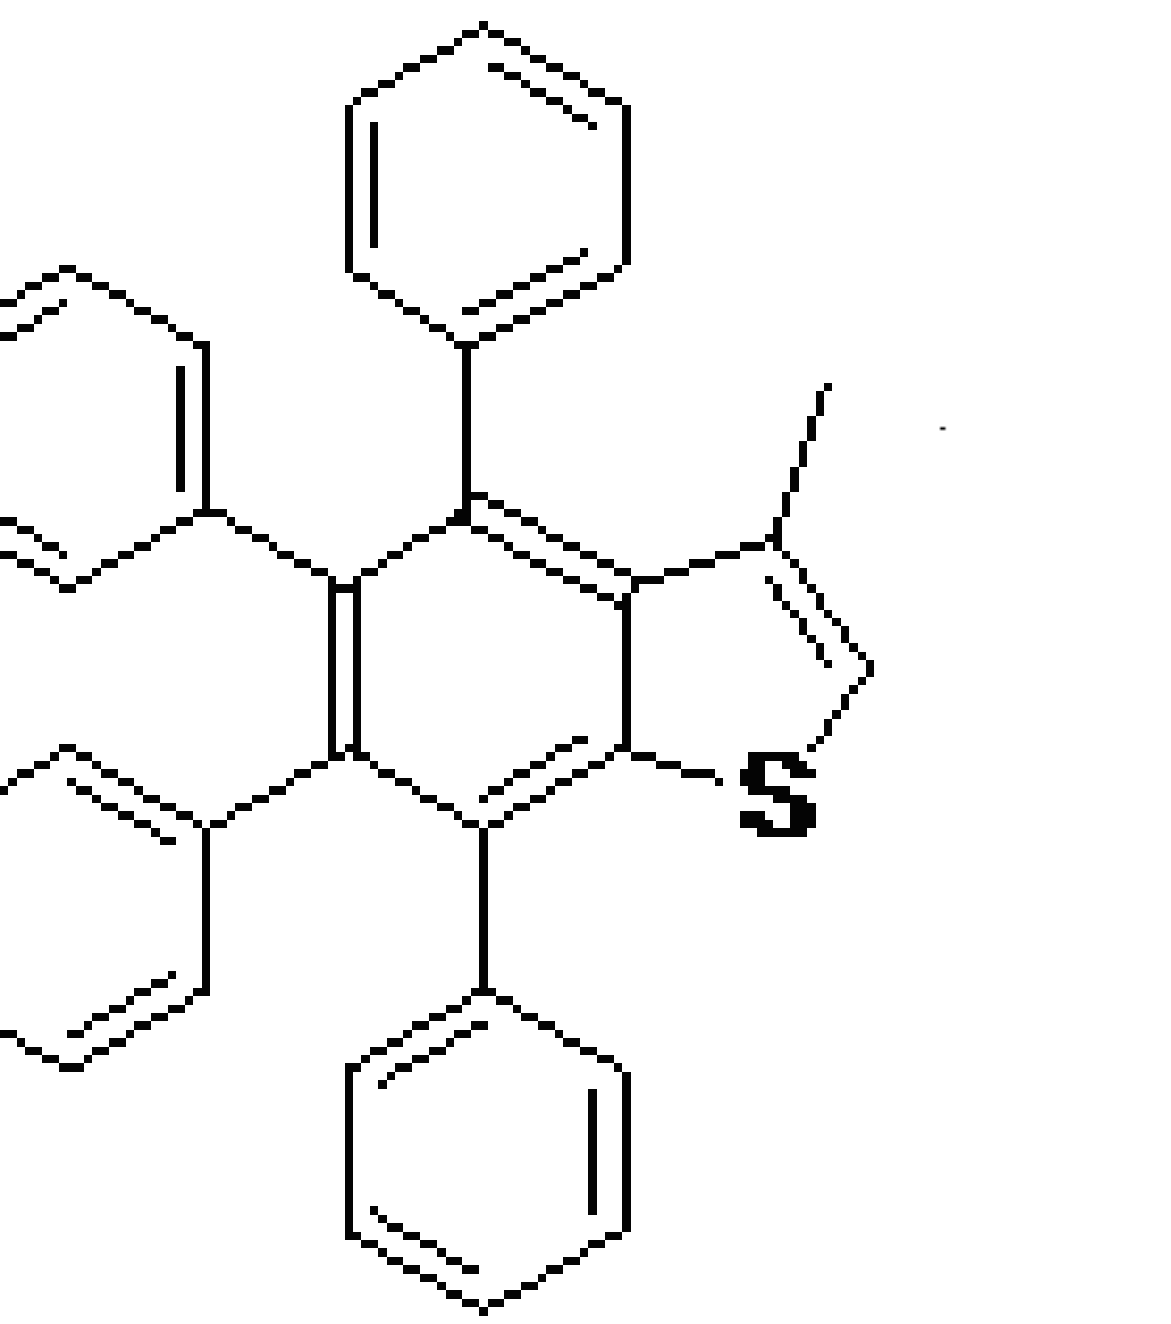

**3da**

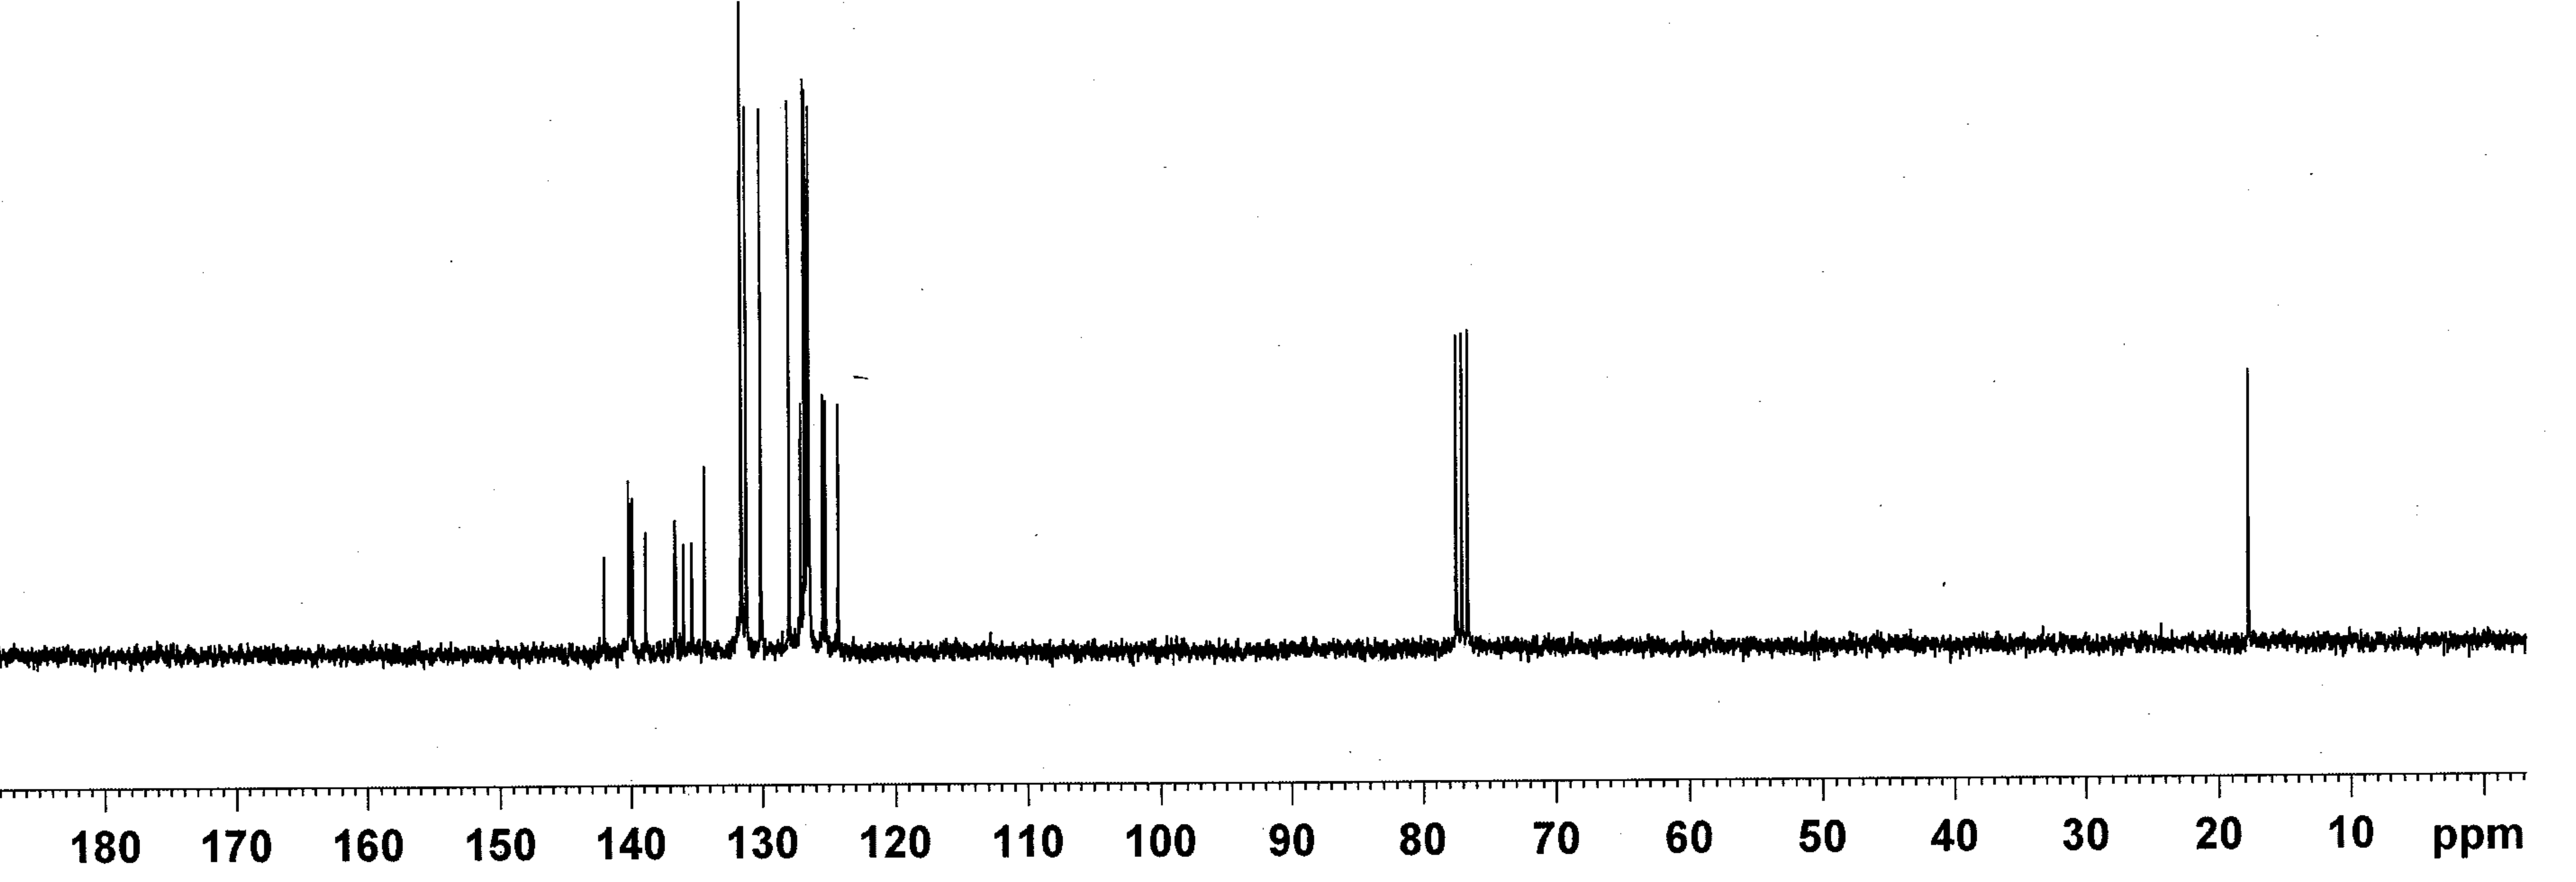

142.085  
140.204  
140.113  
140.041  
139.903  
138.902  
136.652  
136.582  
136.005  
135.387  
134.434  
131.625  
131.593  
131.244  
130.156  
128.013  
127.152  
126.869  
126.720  
126.595  
126.500  
125.515  
125.302  
124.348

77.541  
77.116  
76.694

17.775



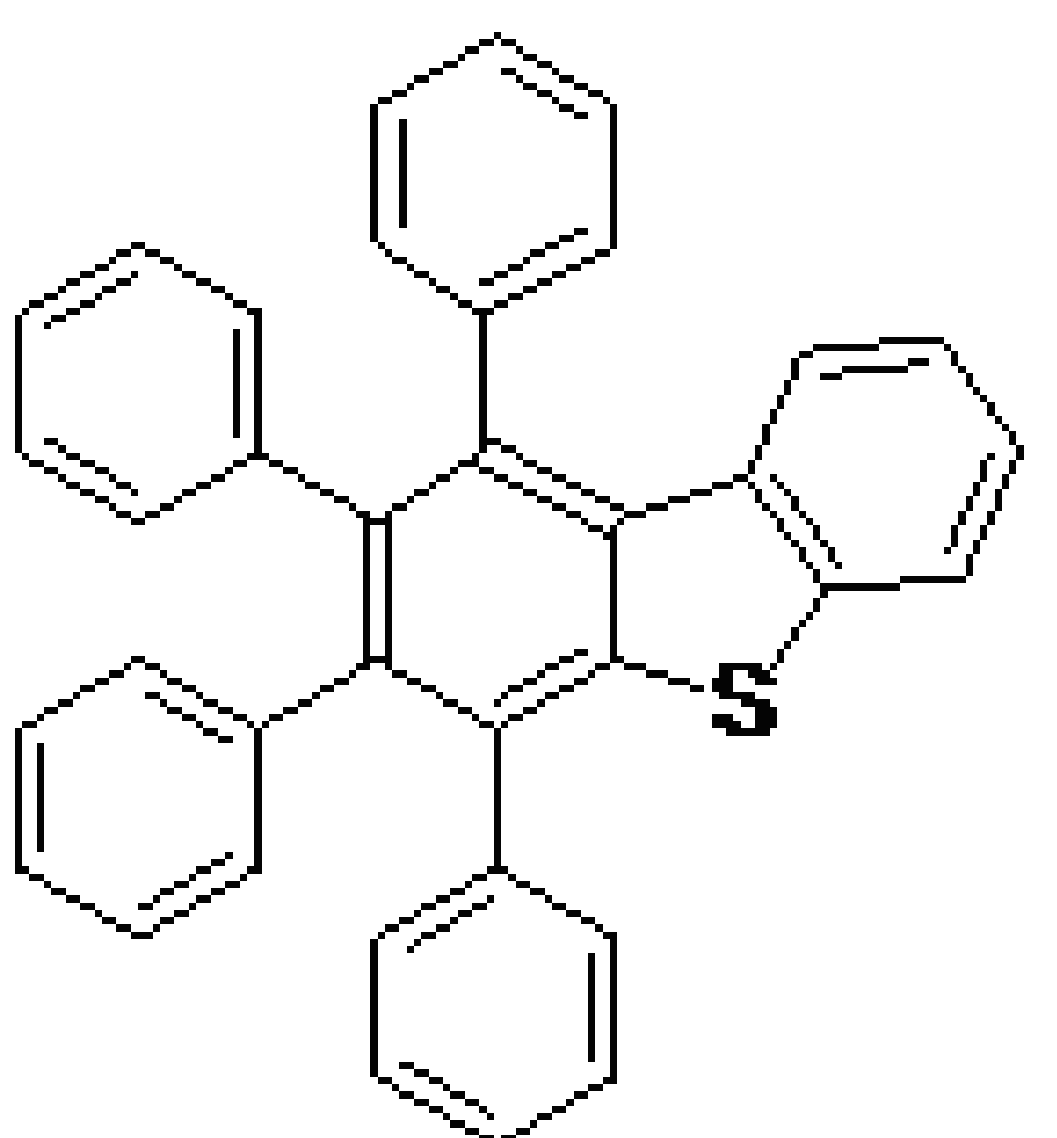

**3ea**

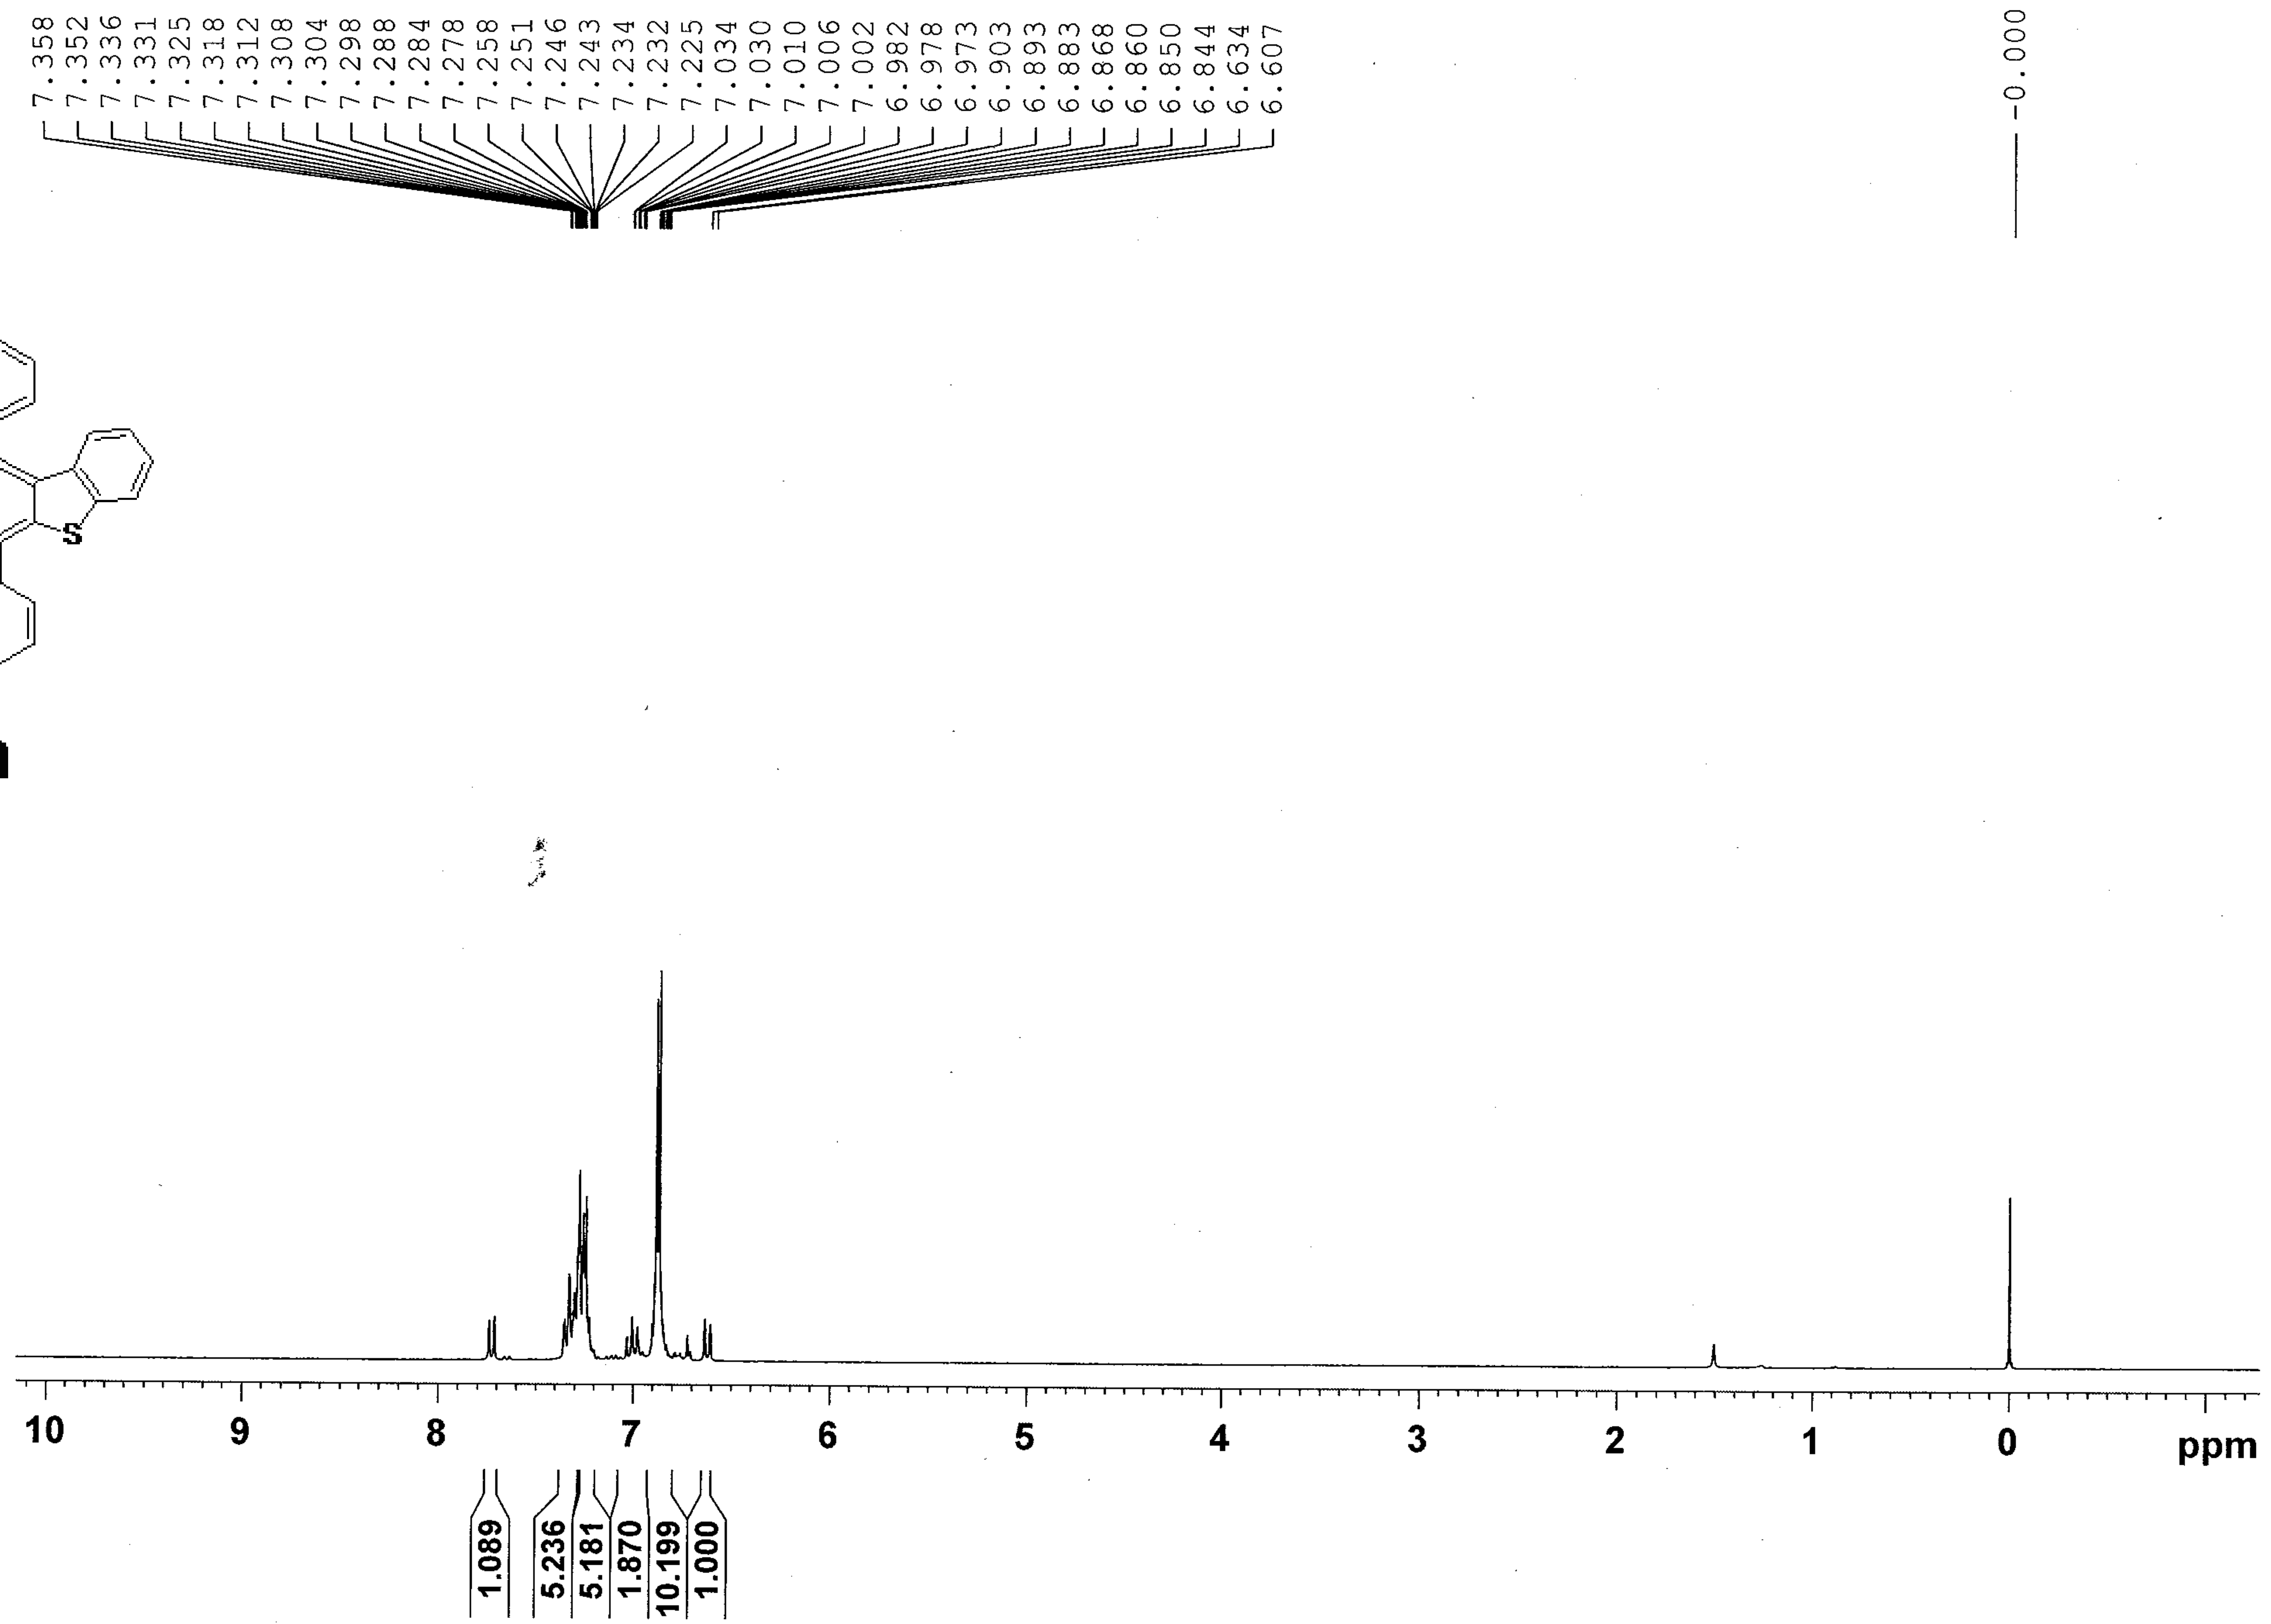

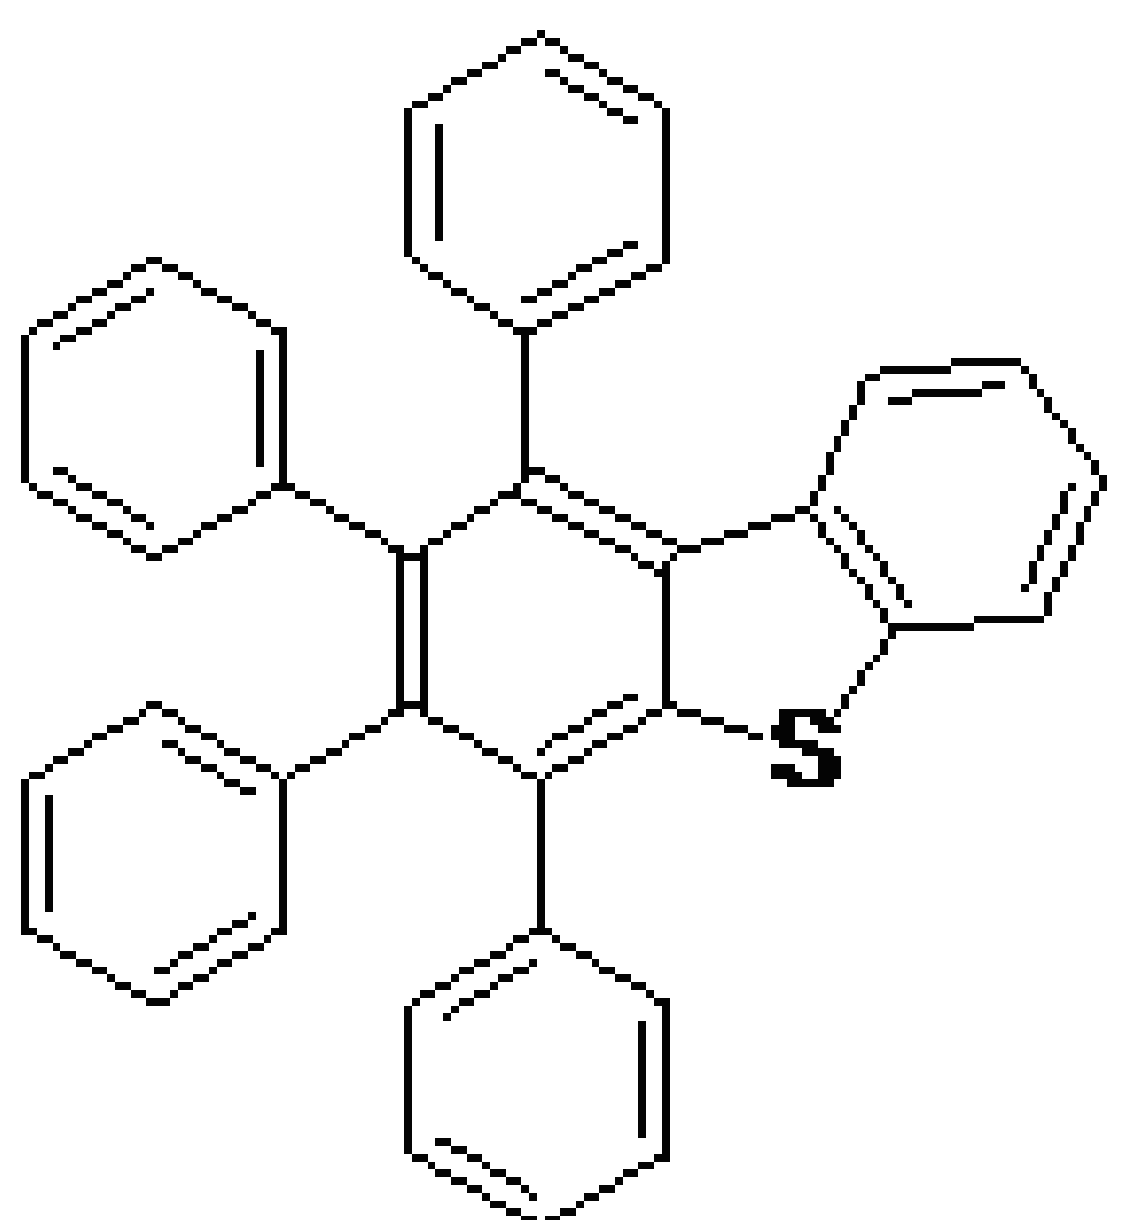

**3ea**

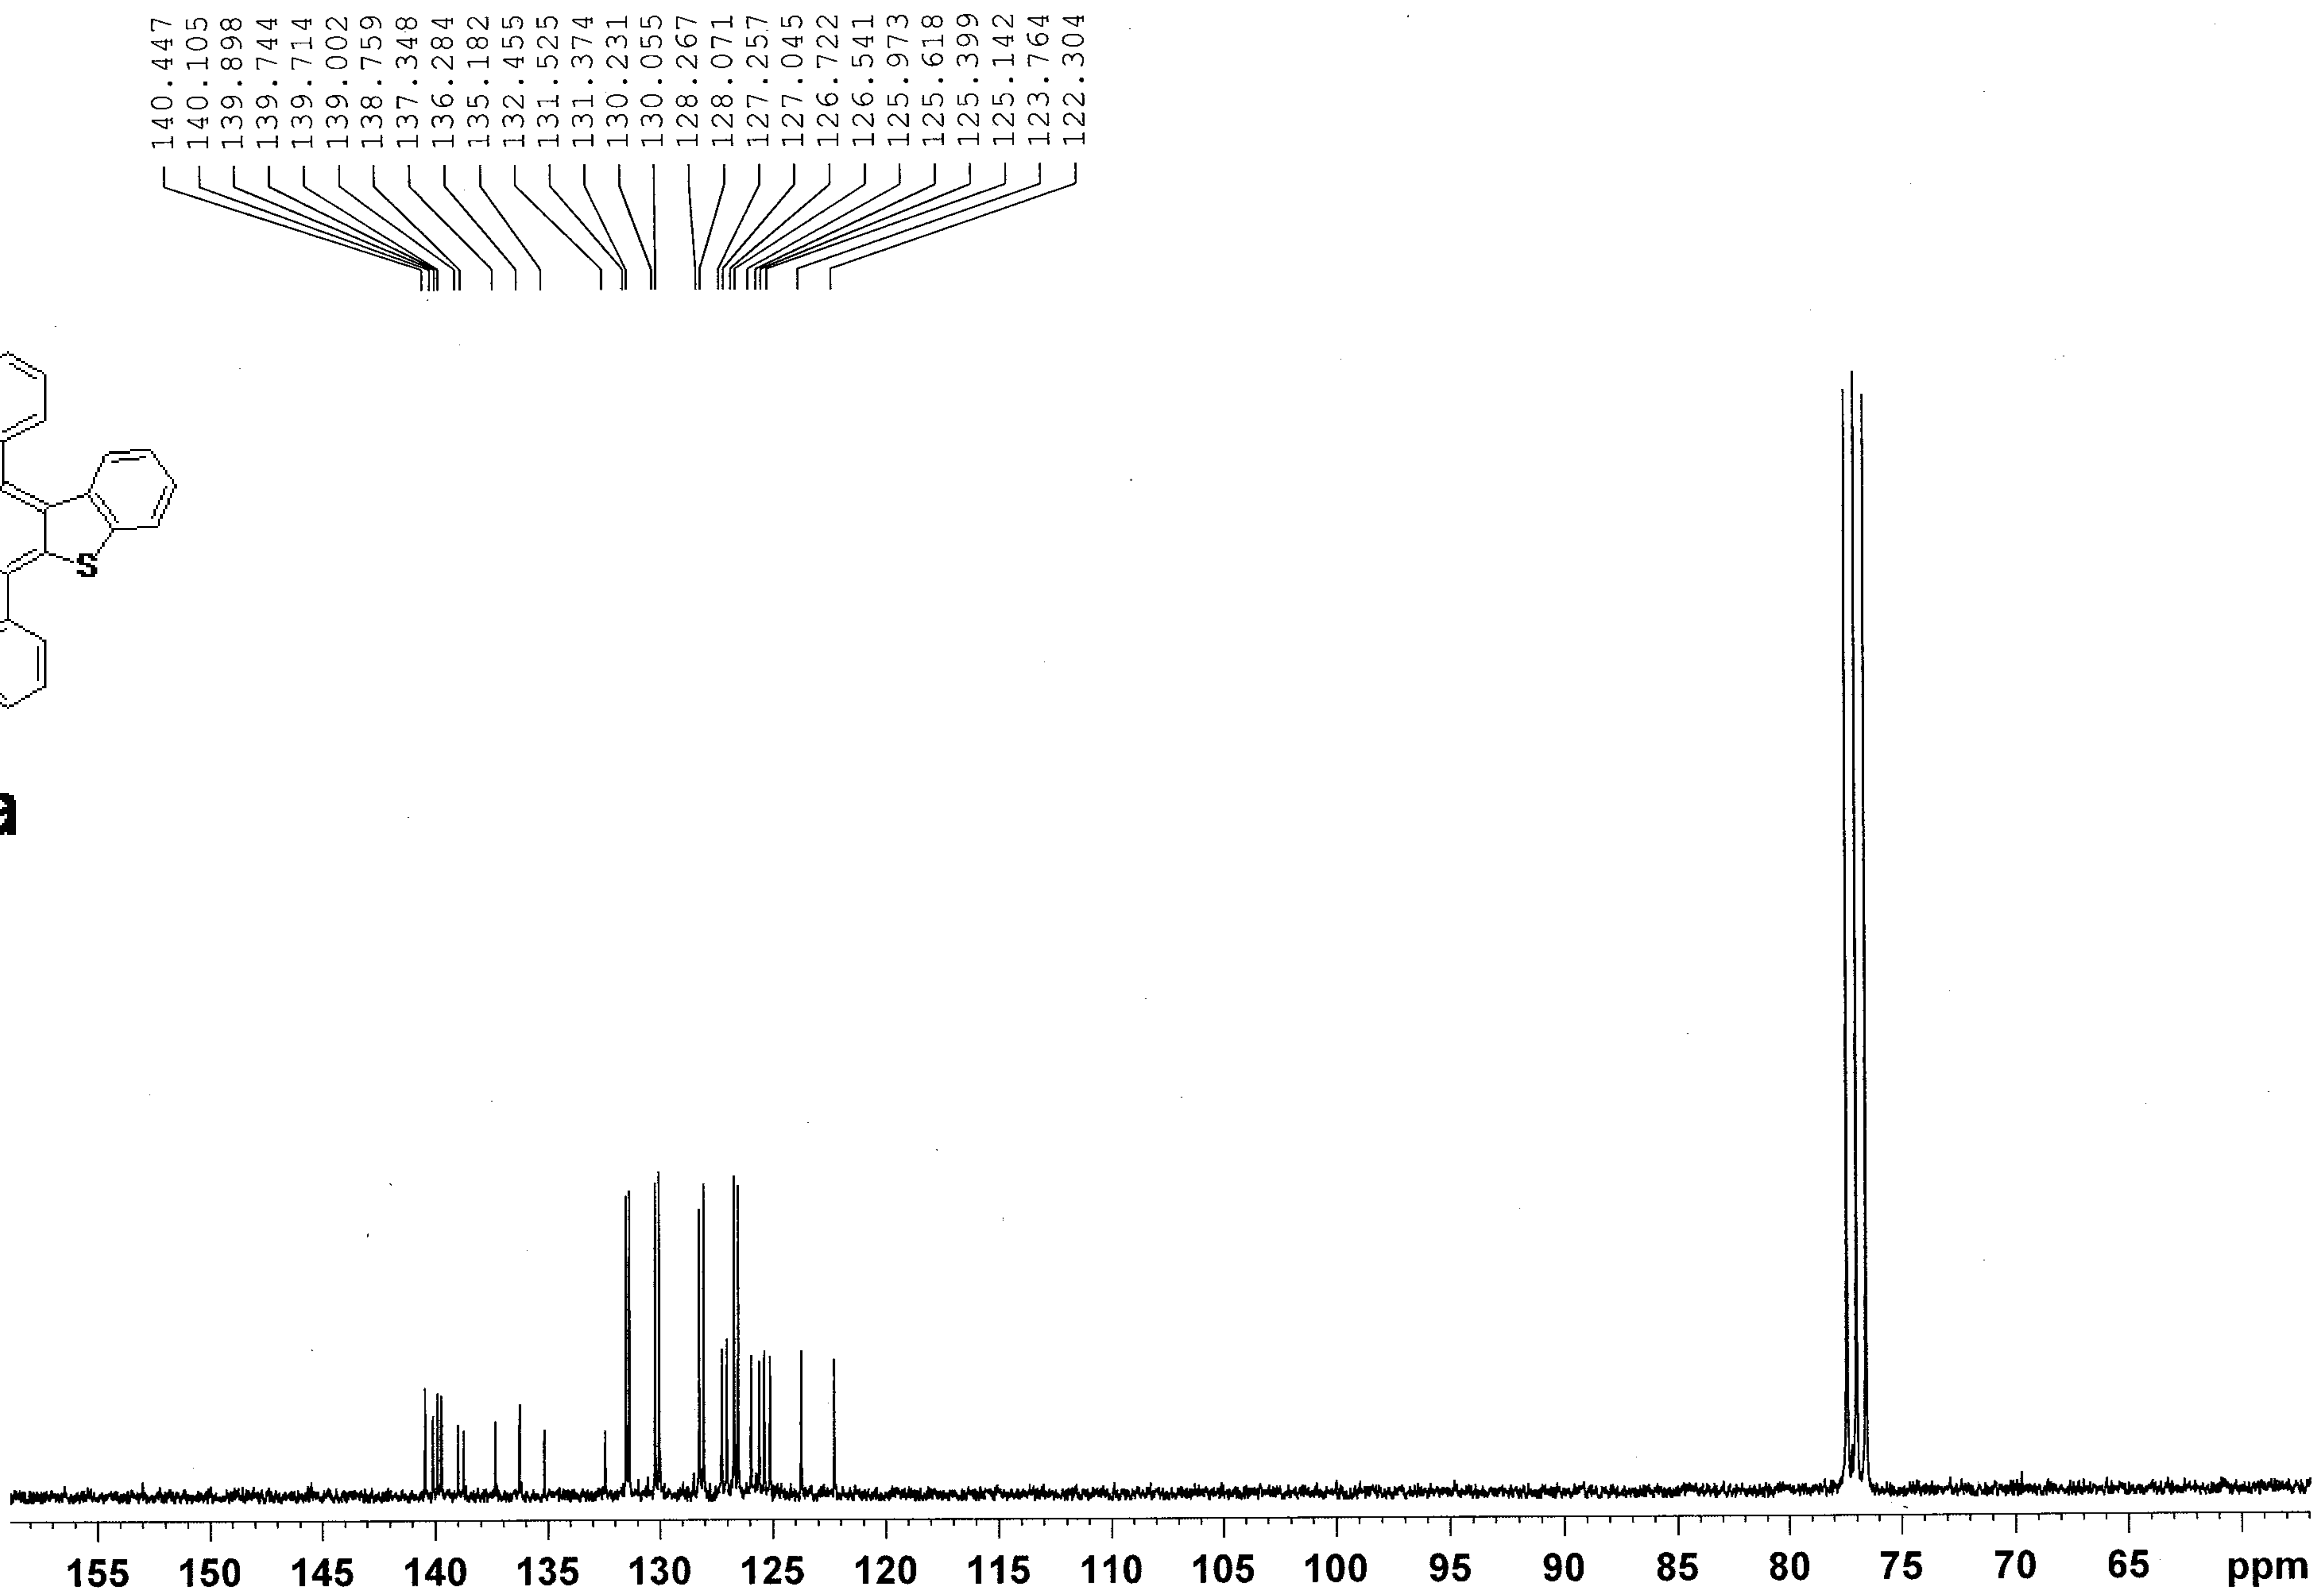

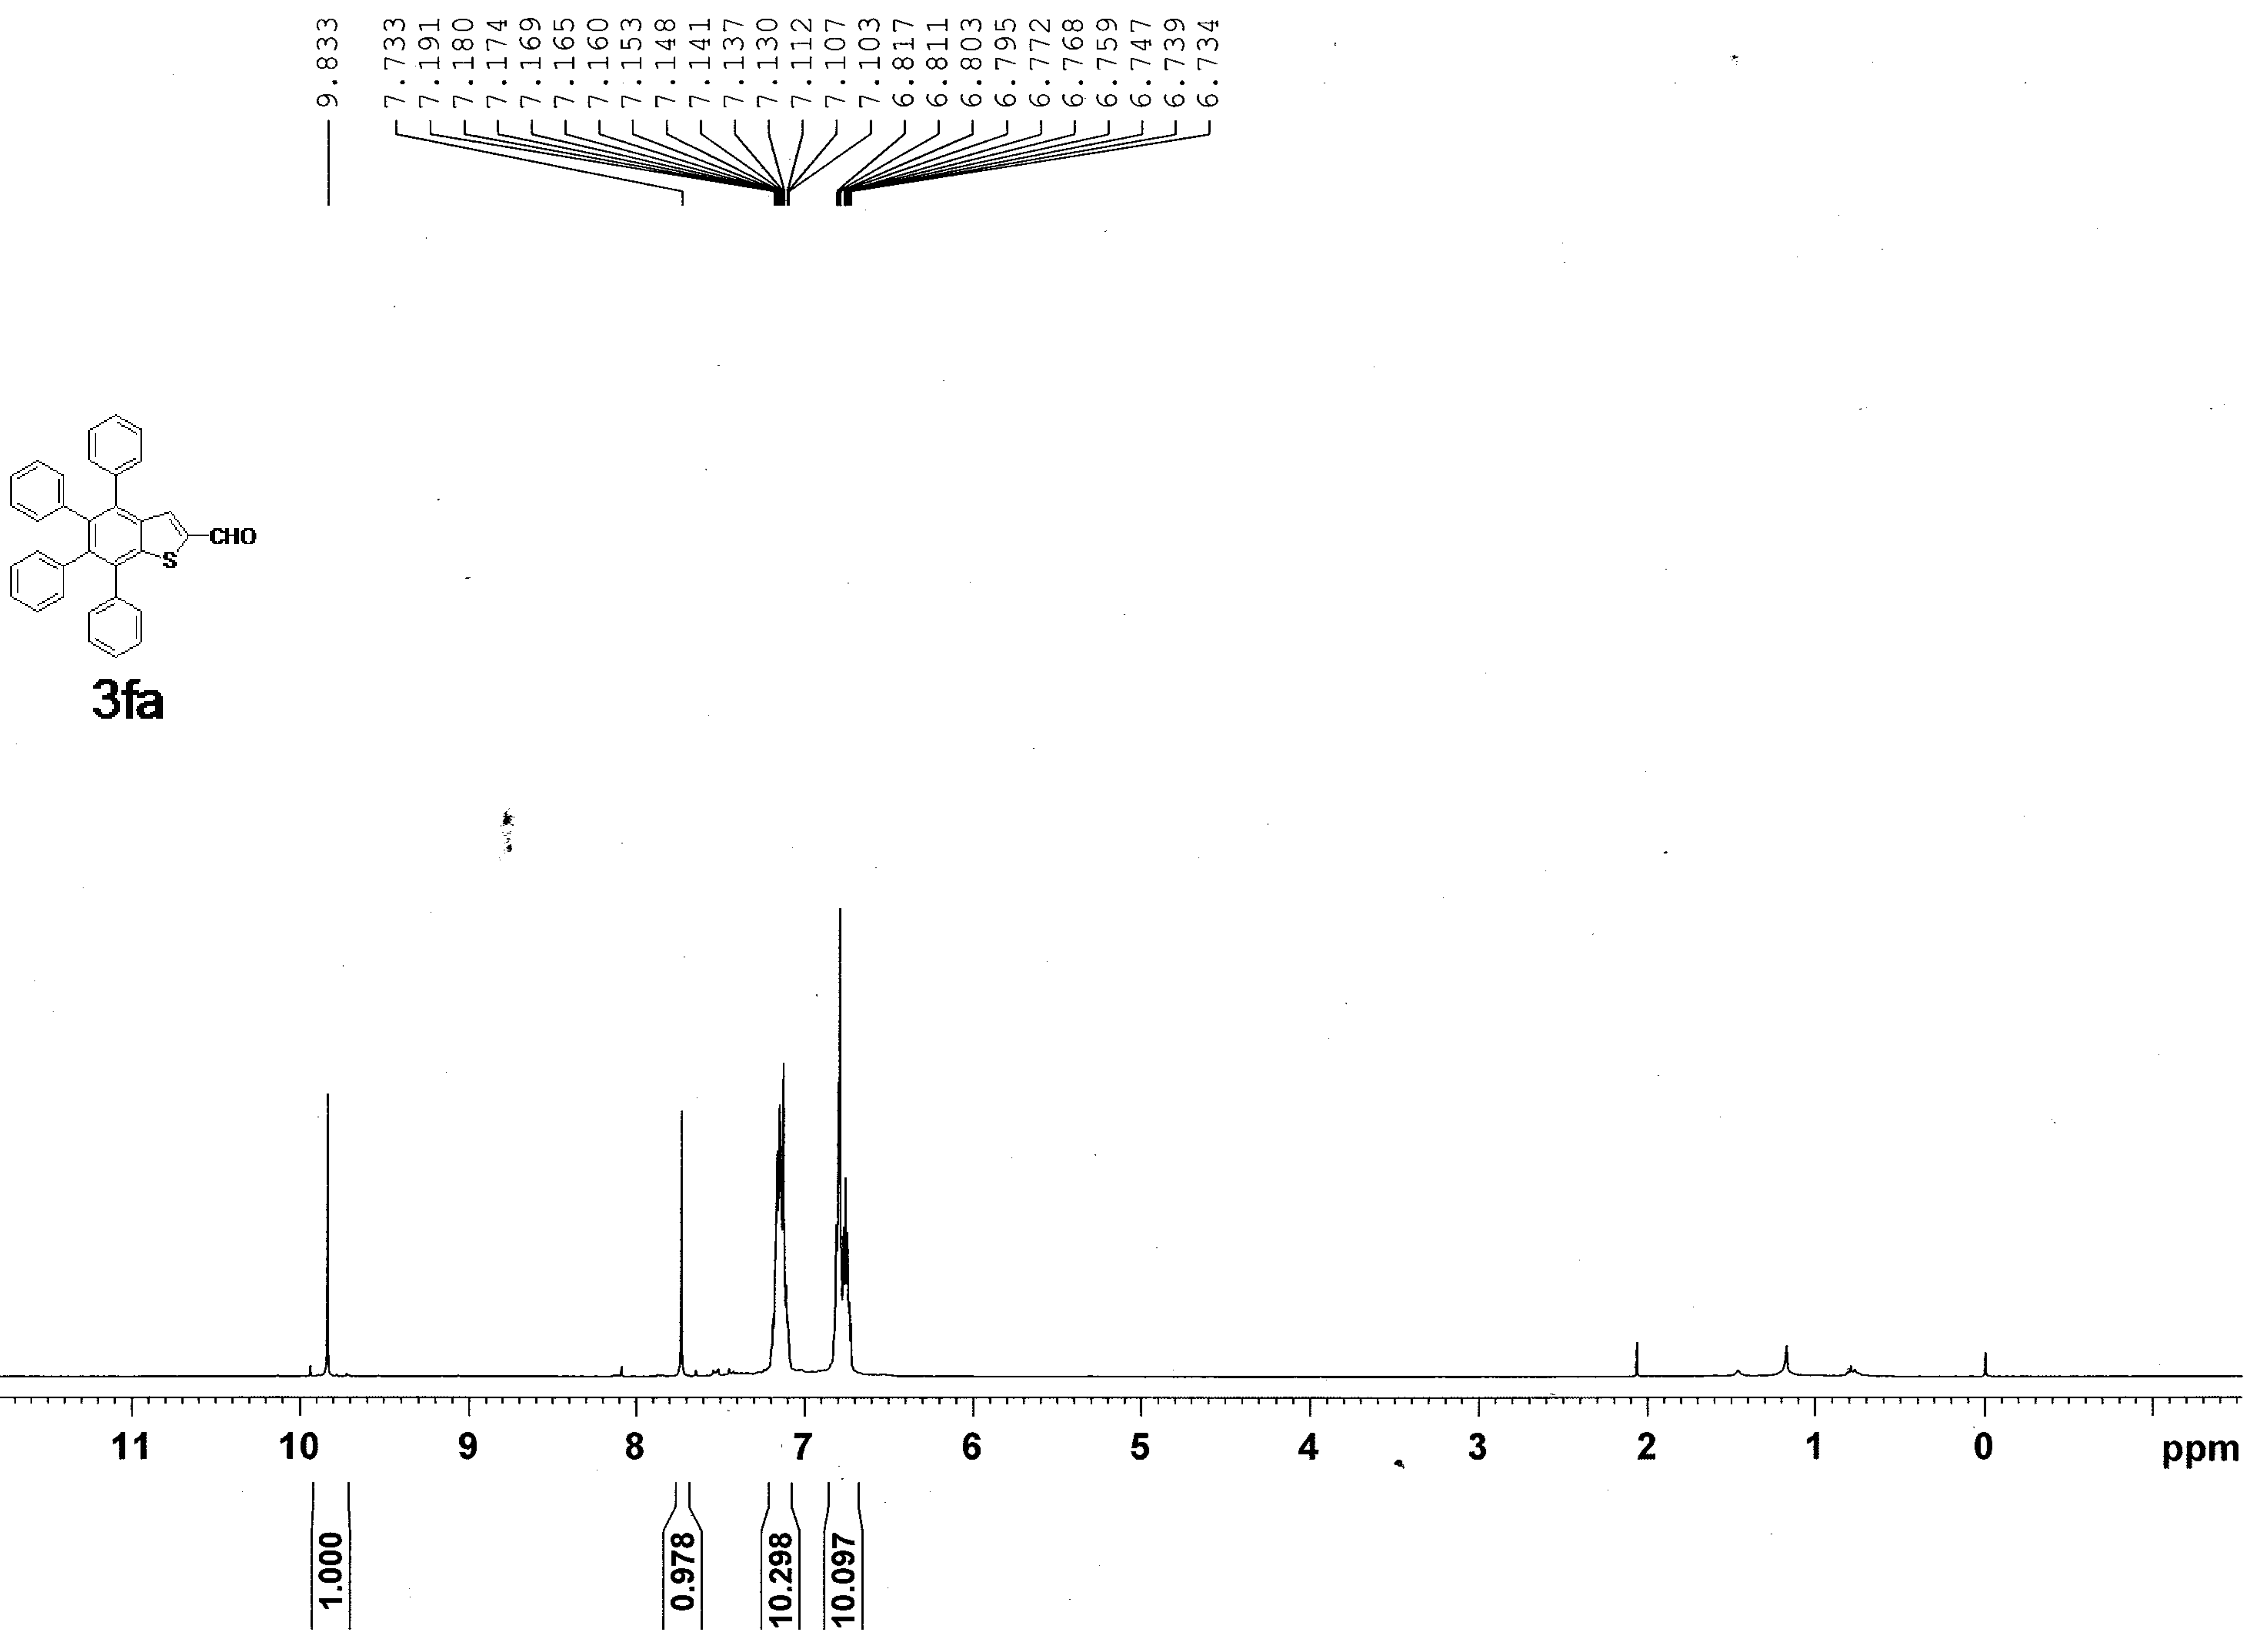

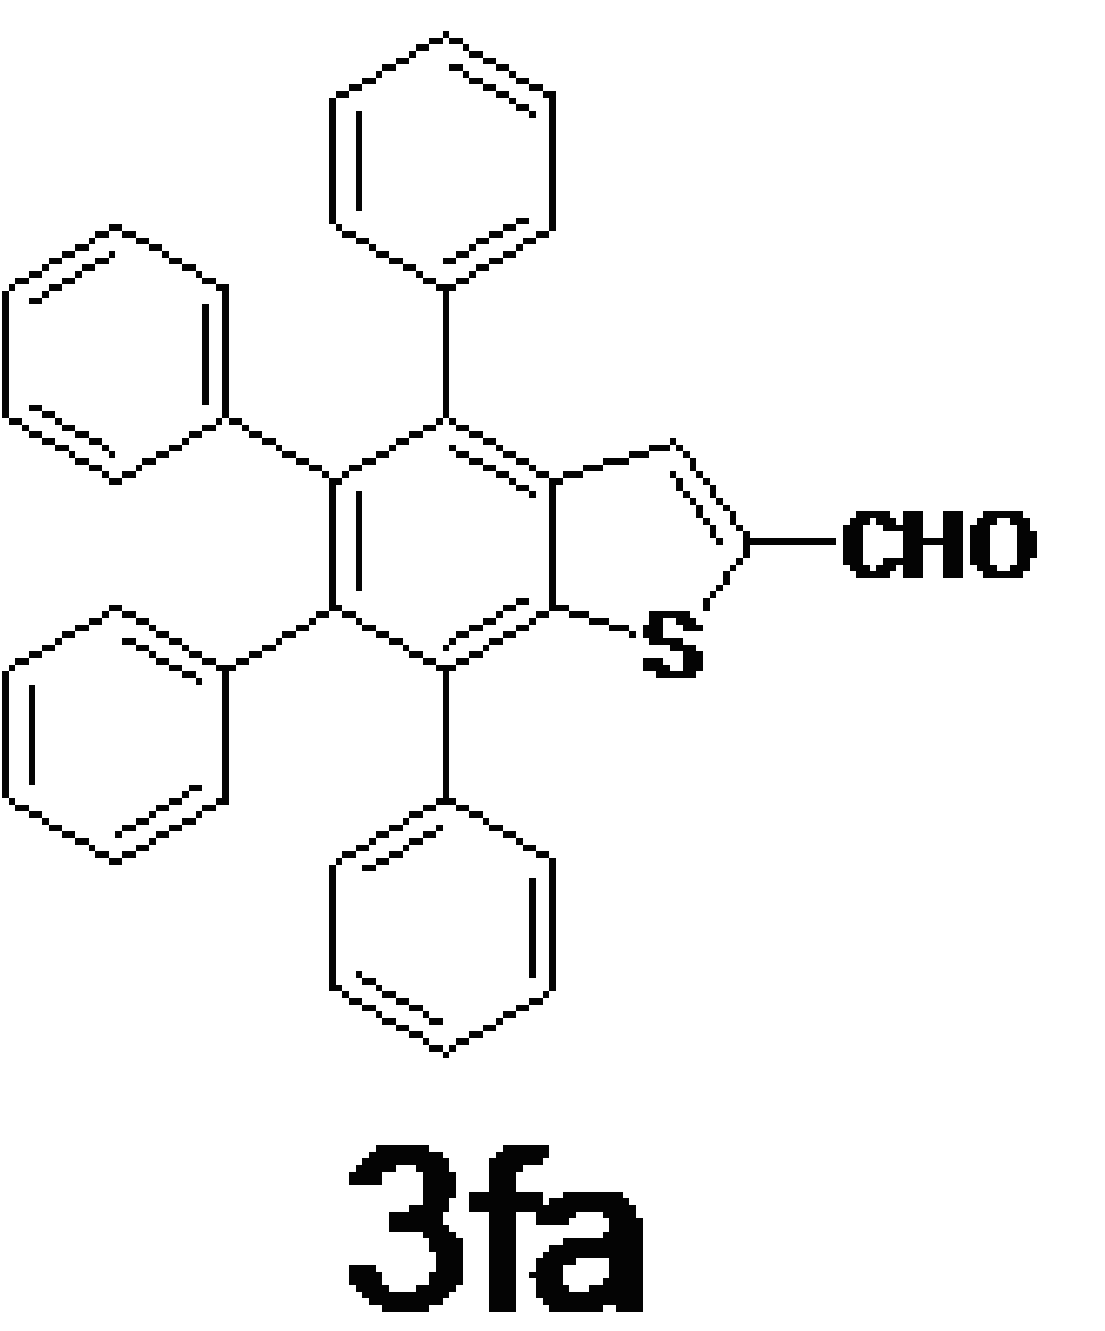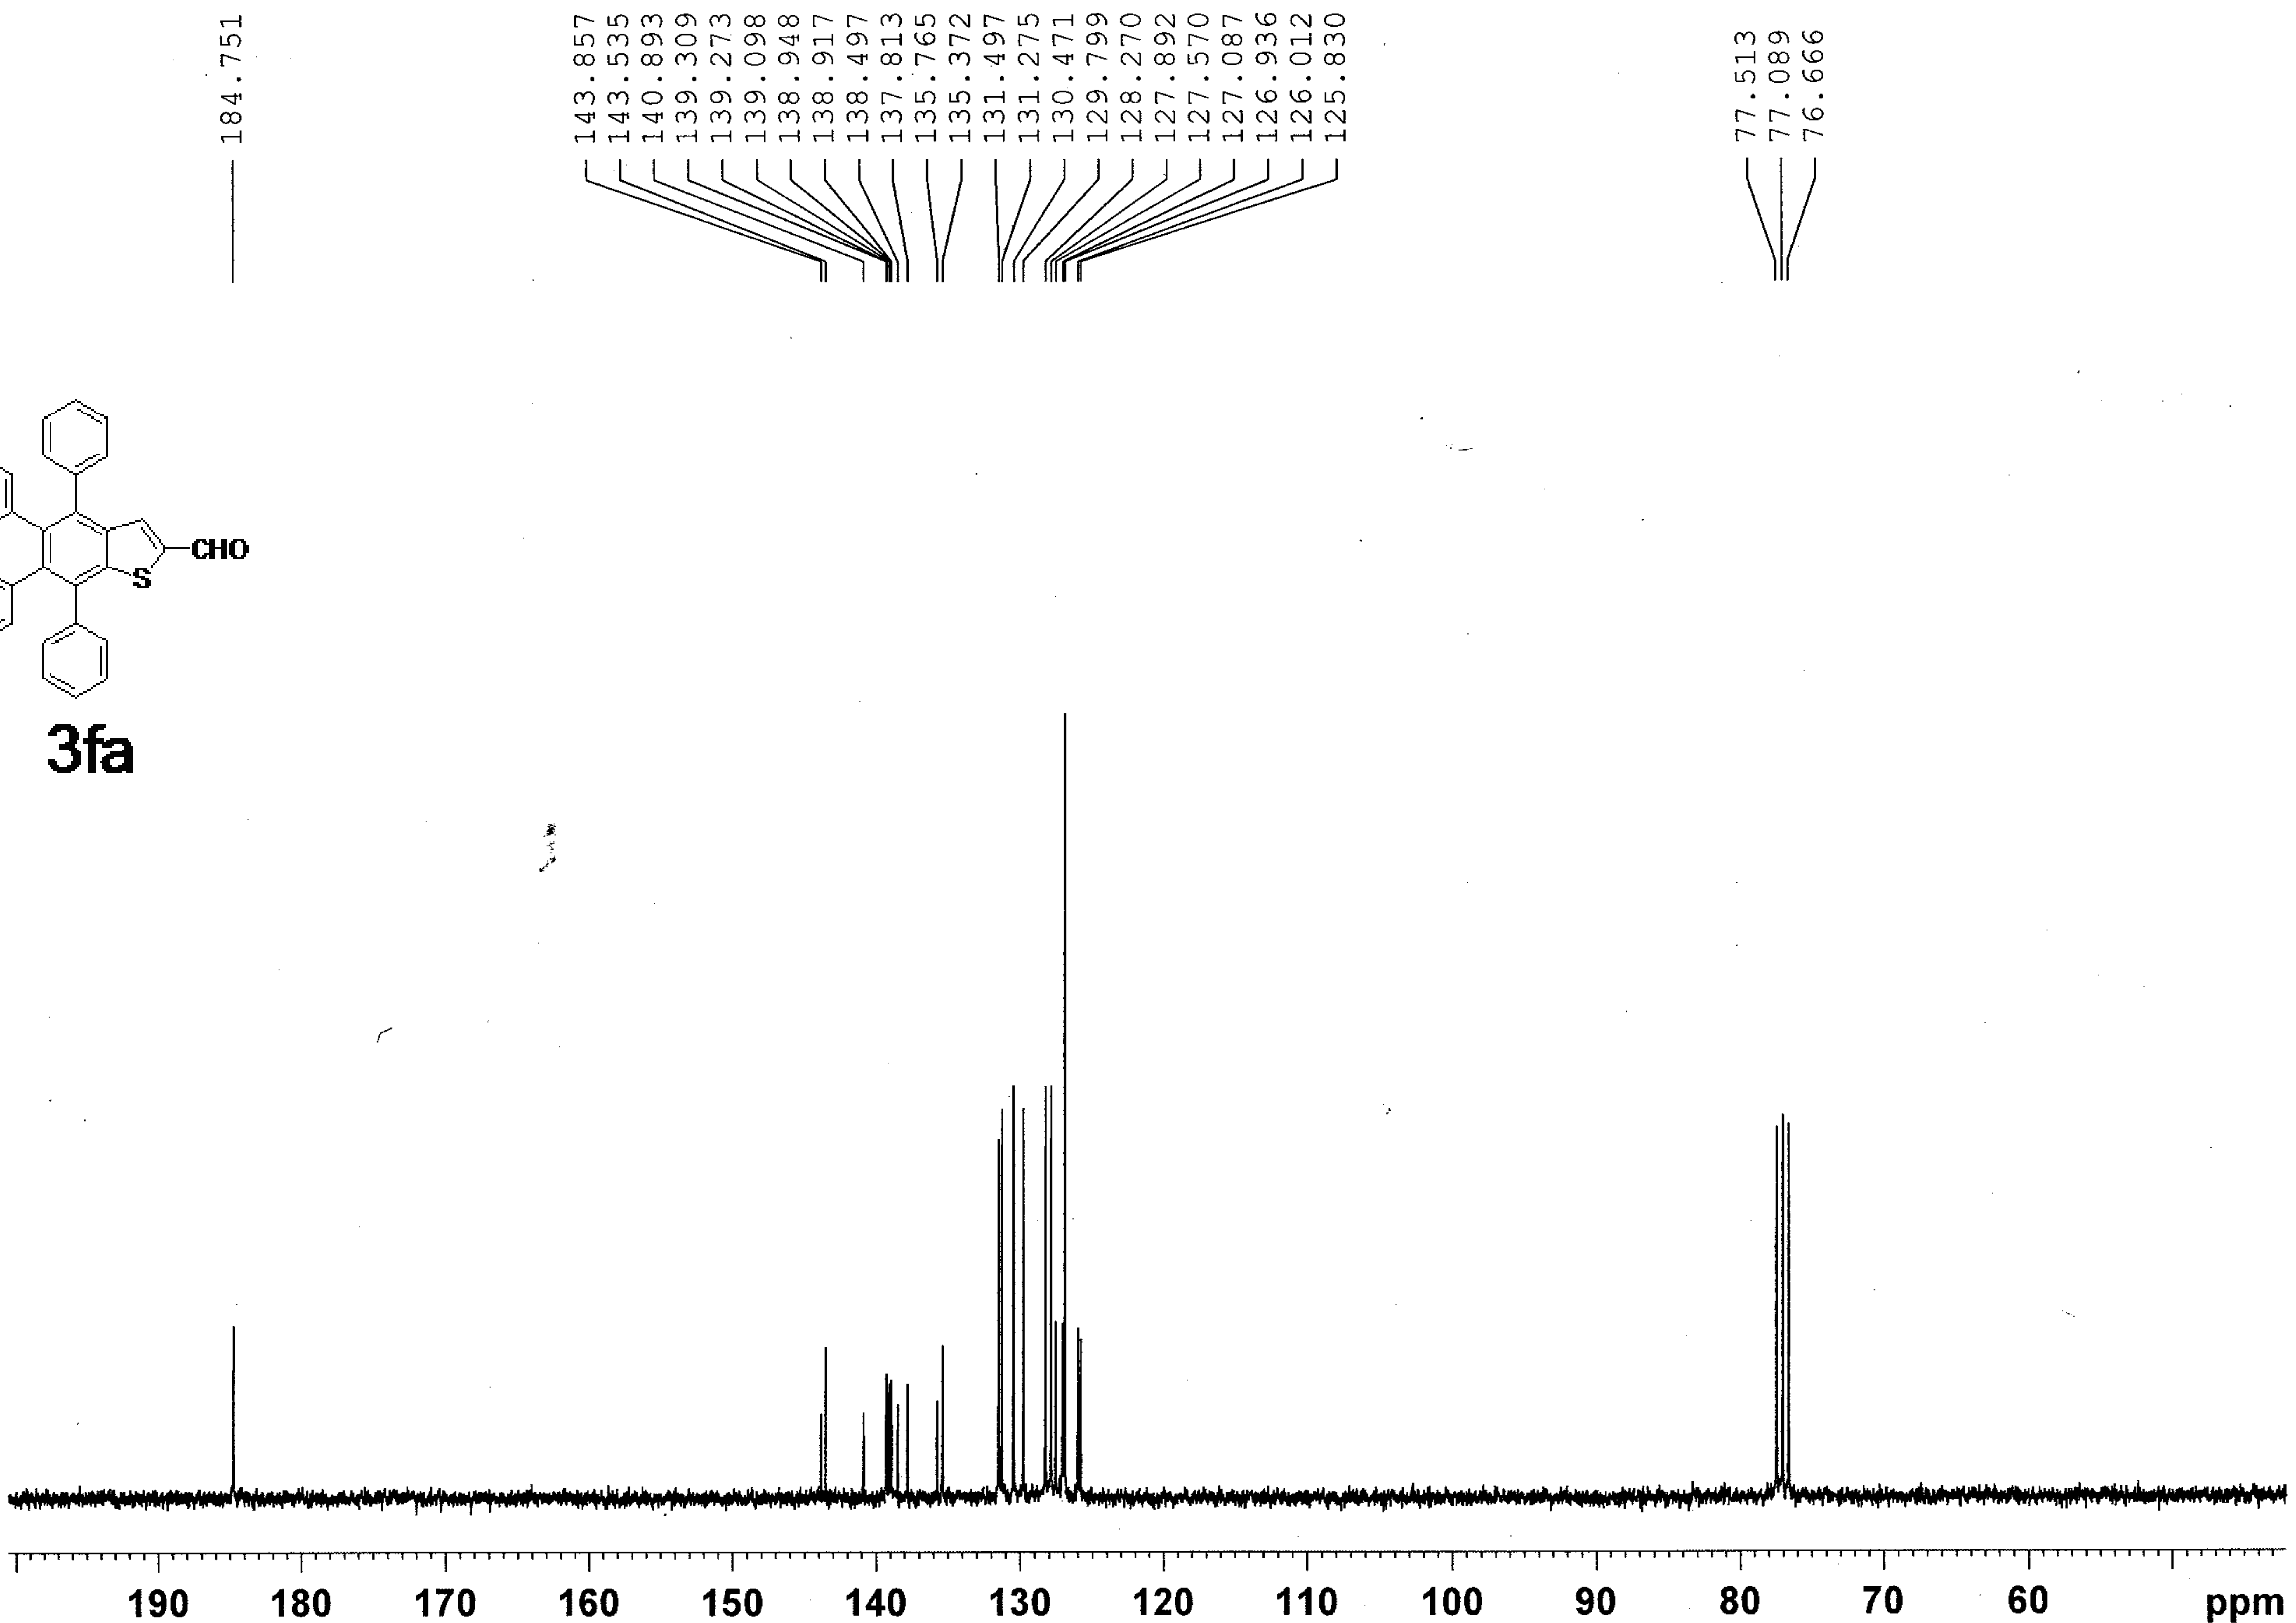

huanghn311 p2

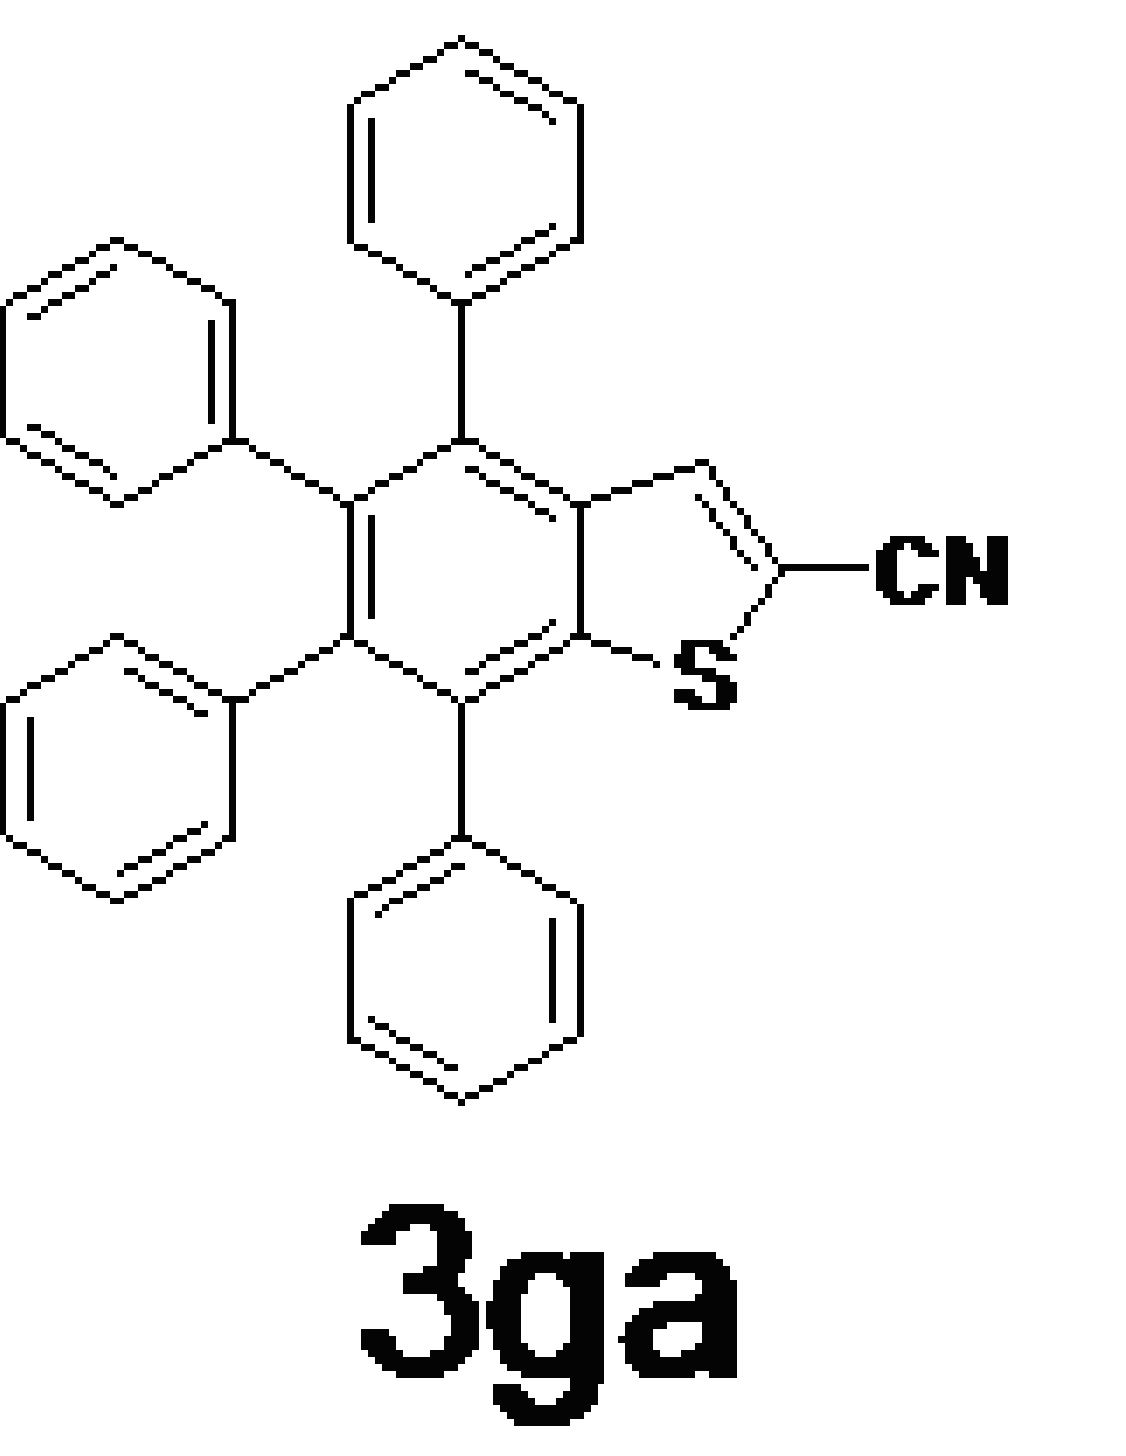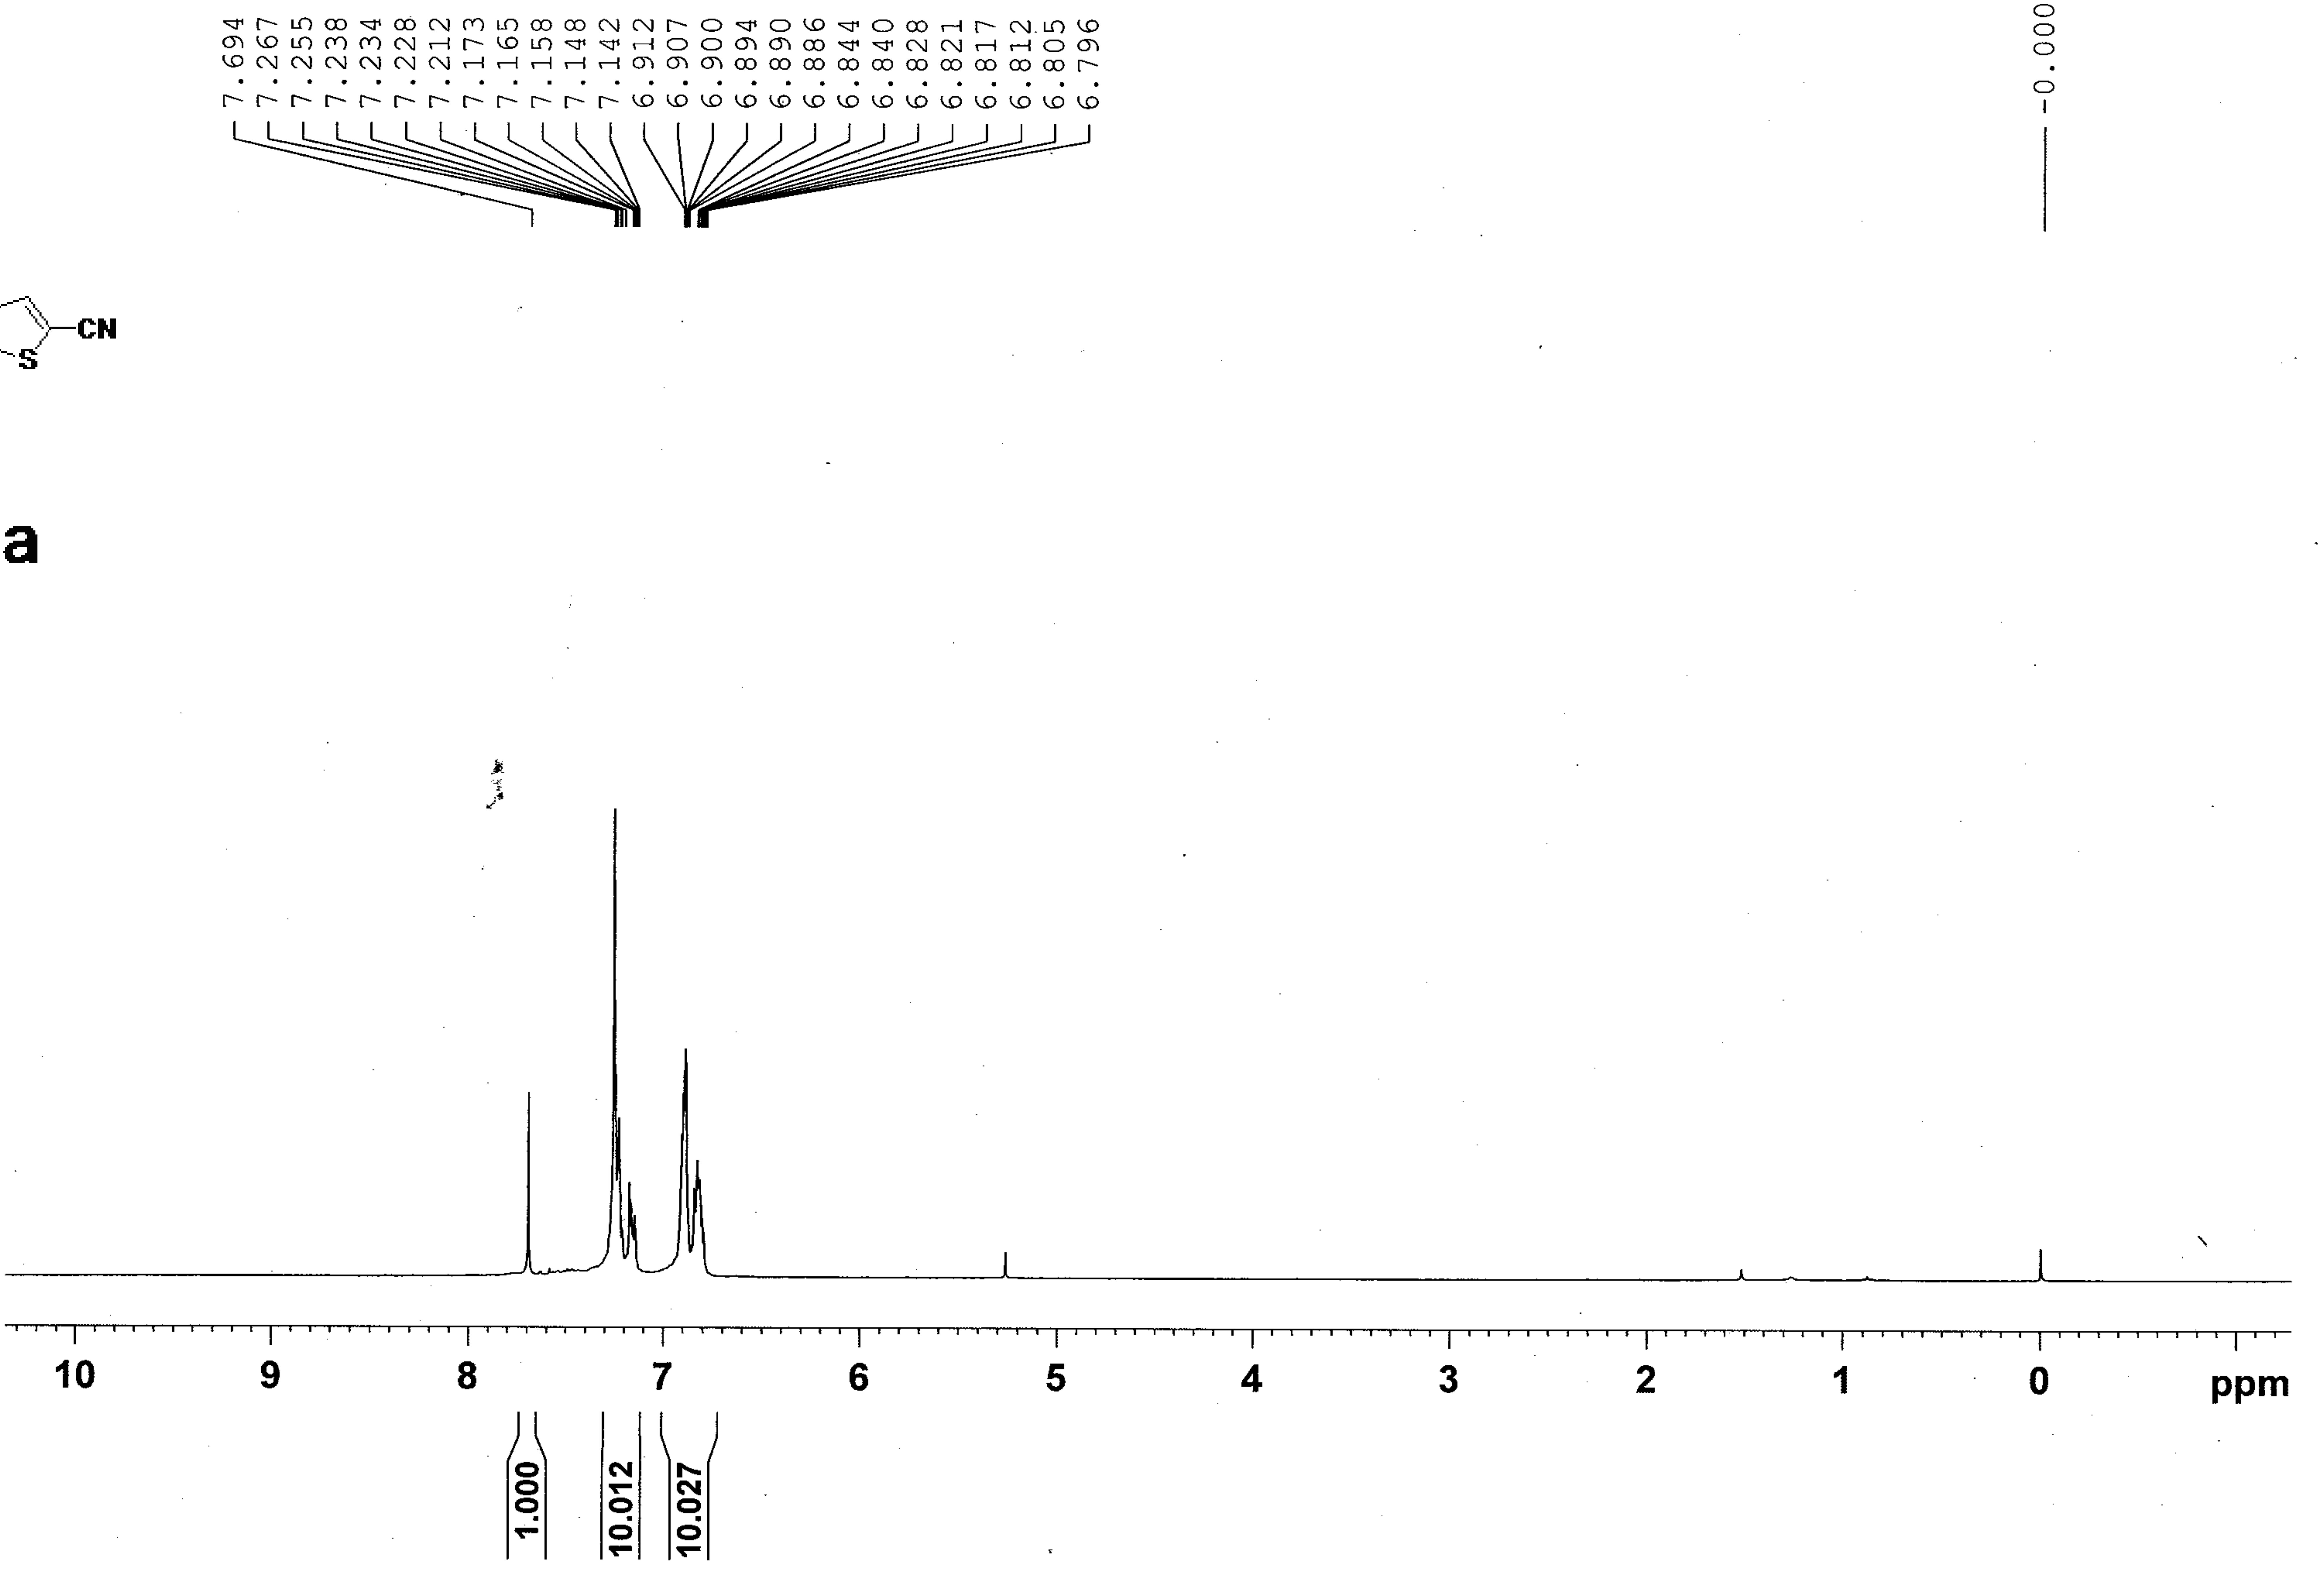

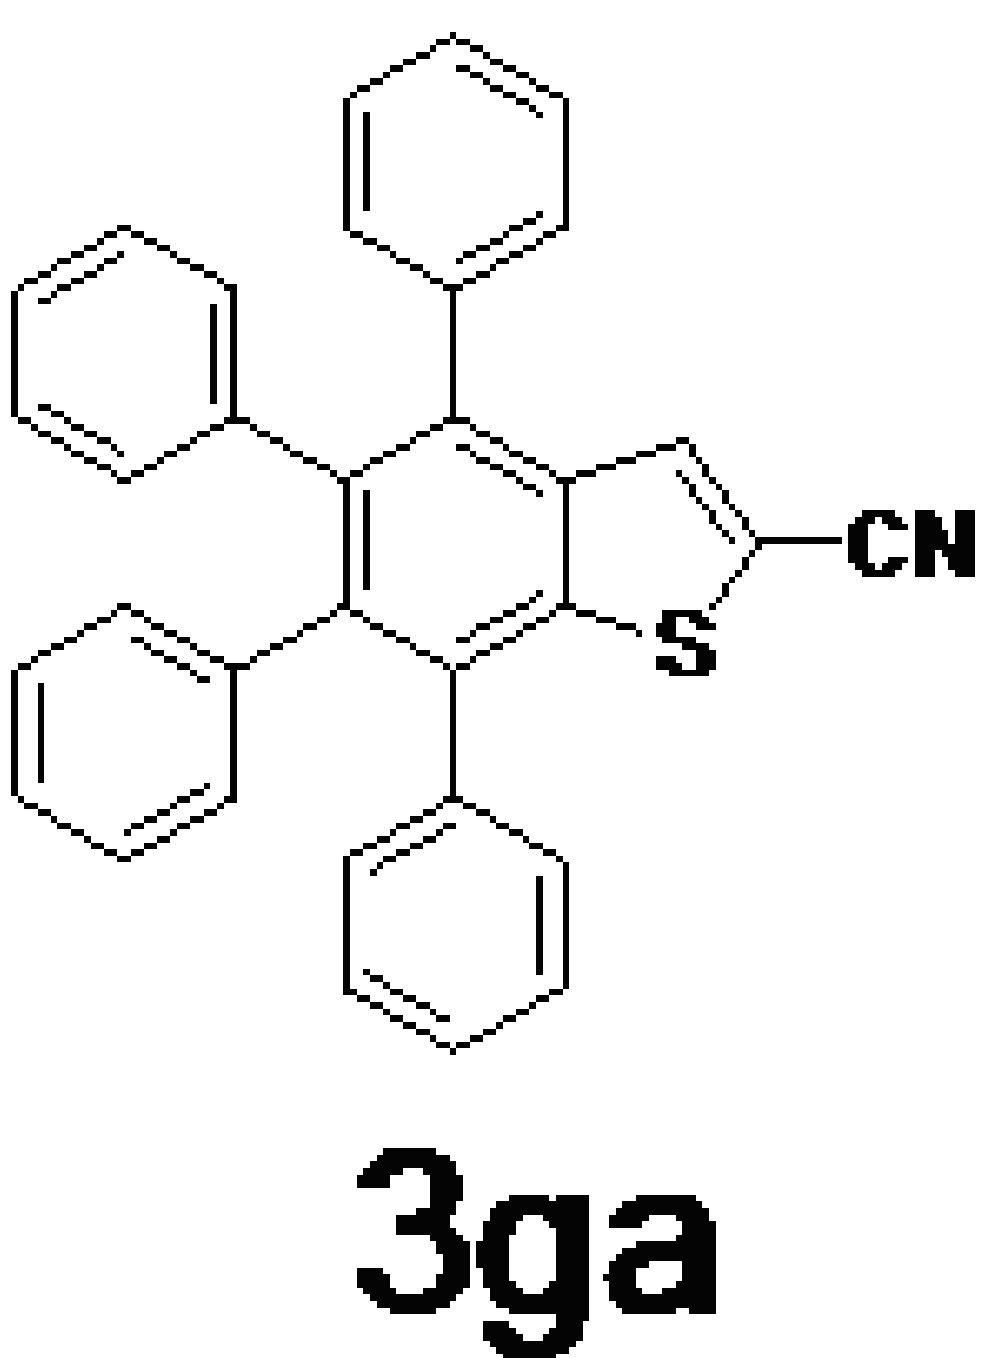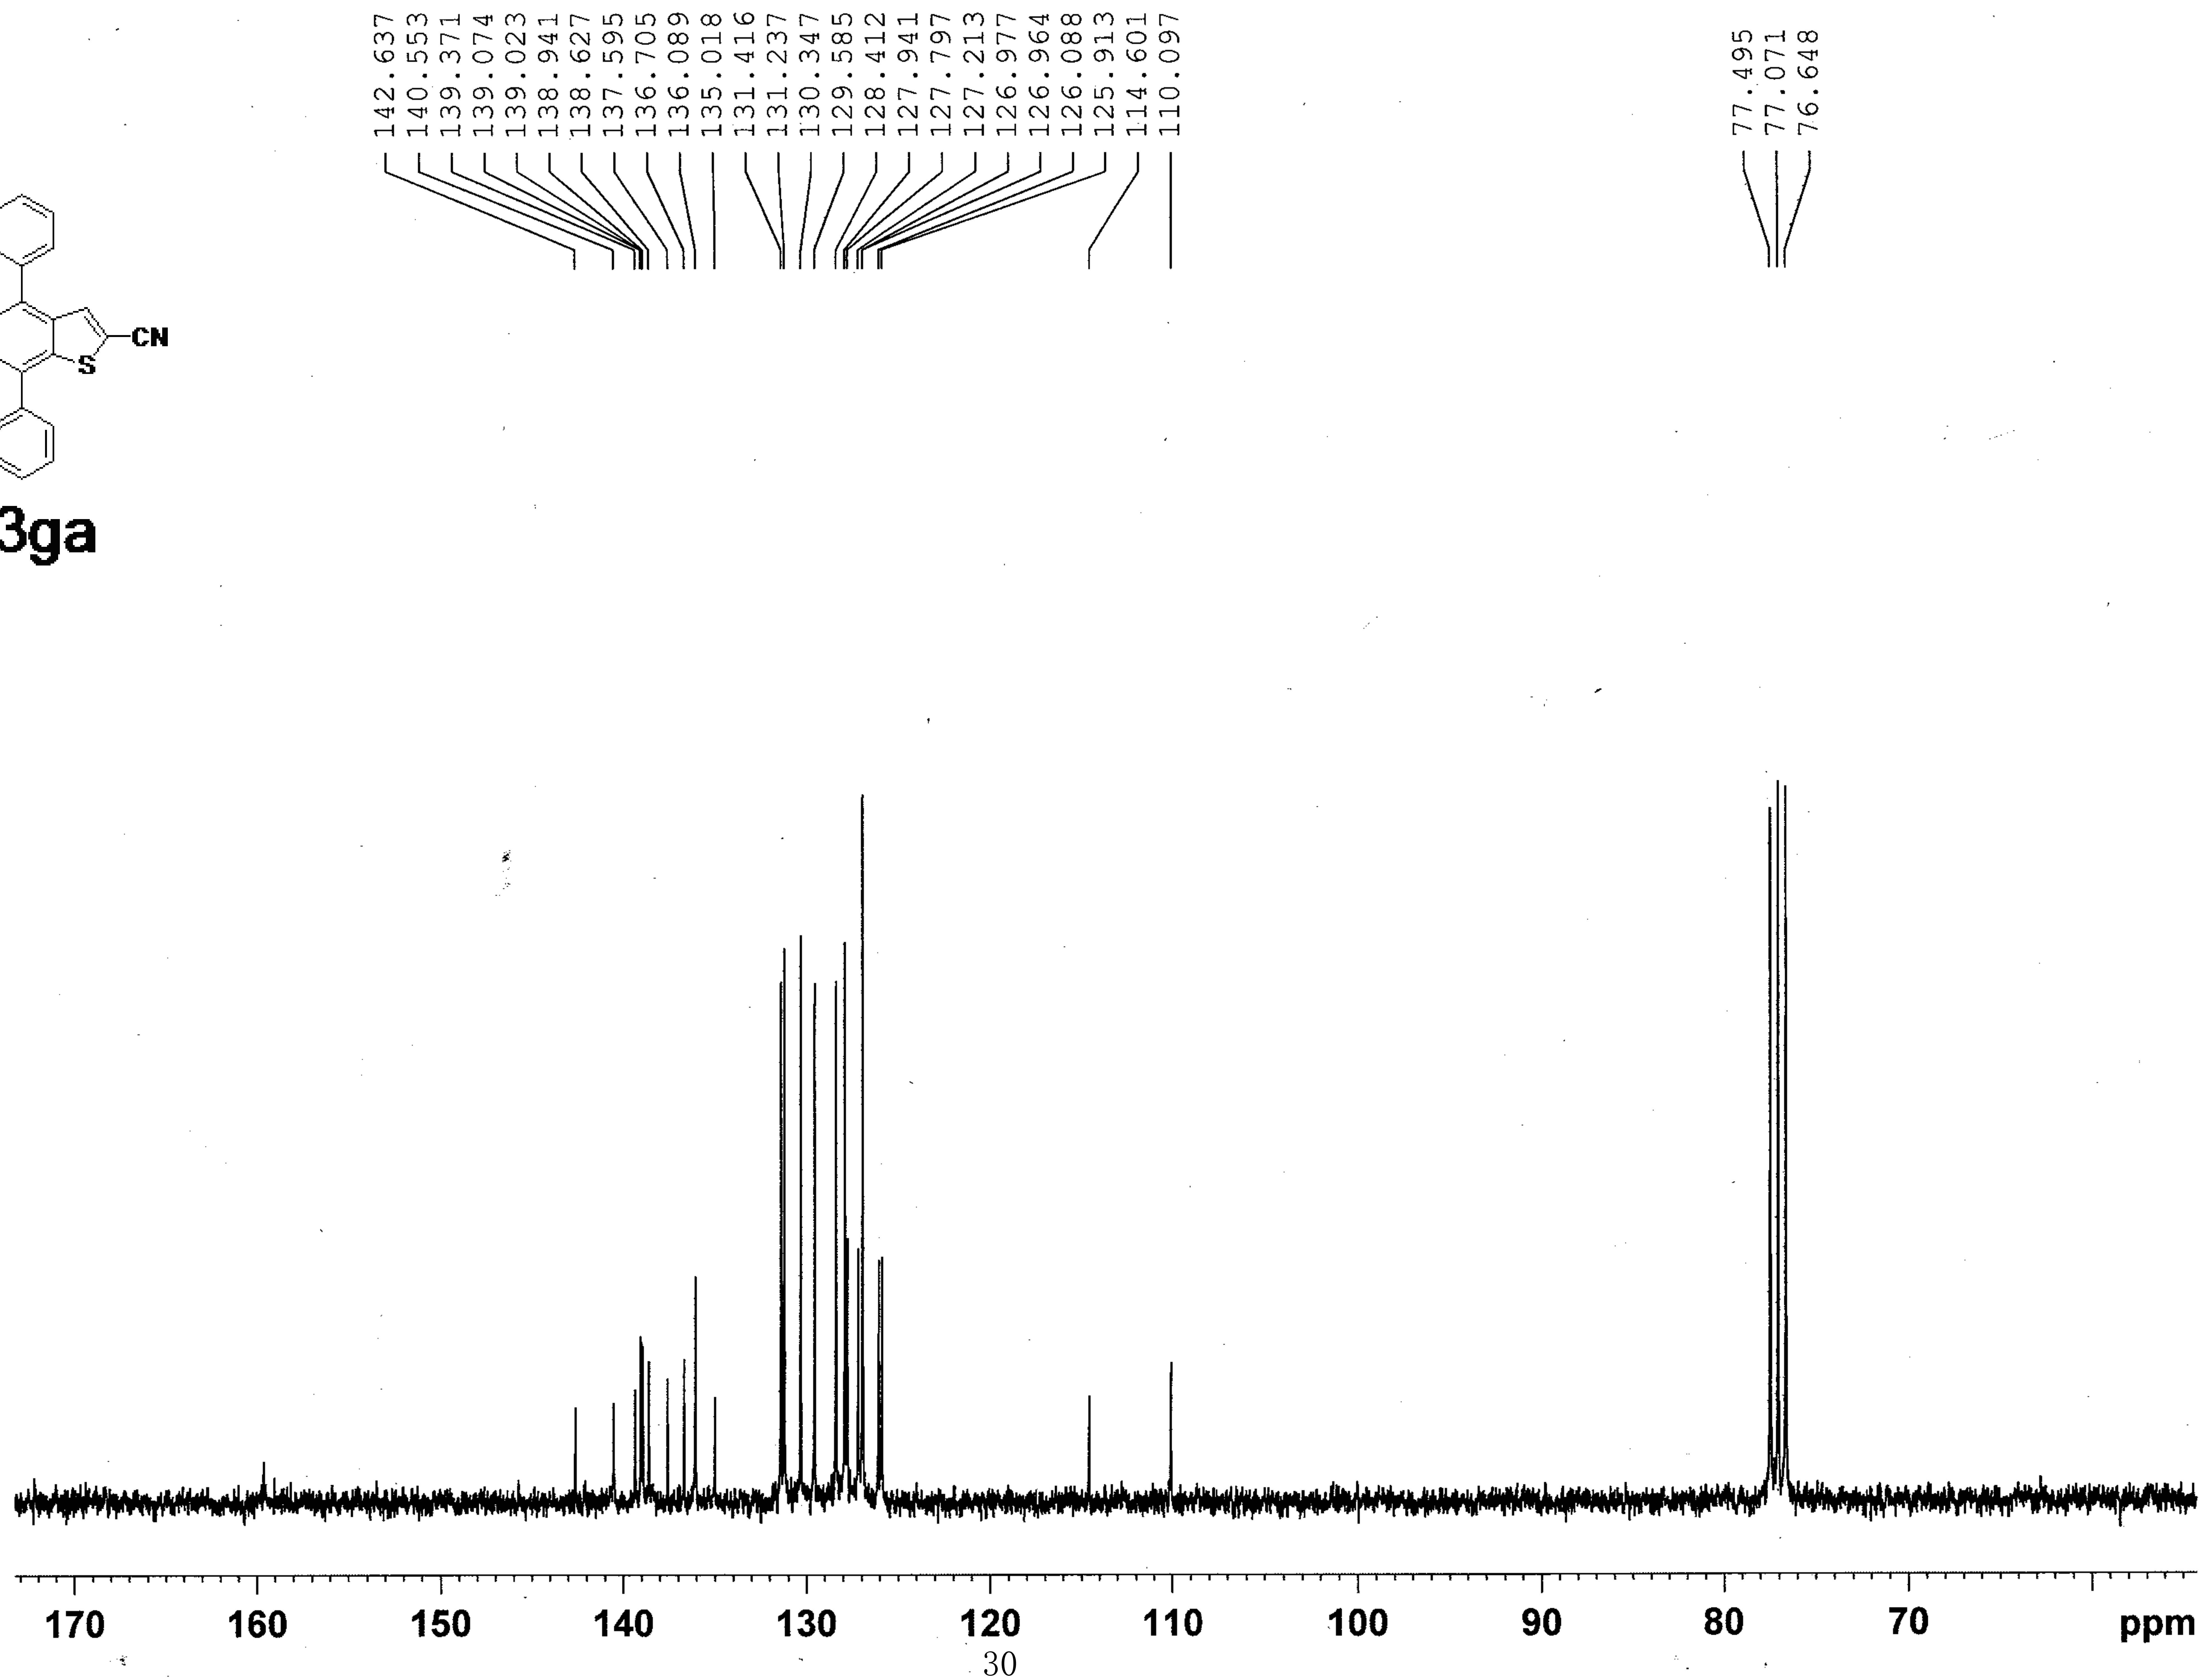

huanghn261 p3

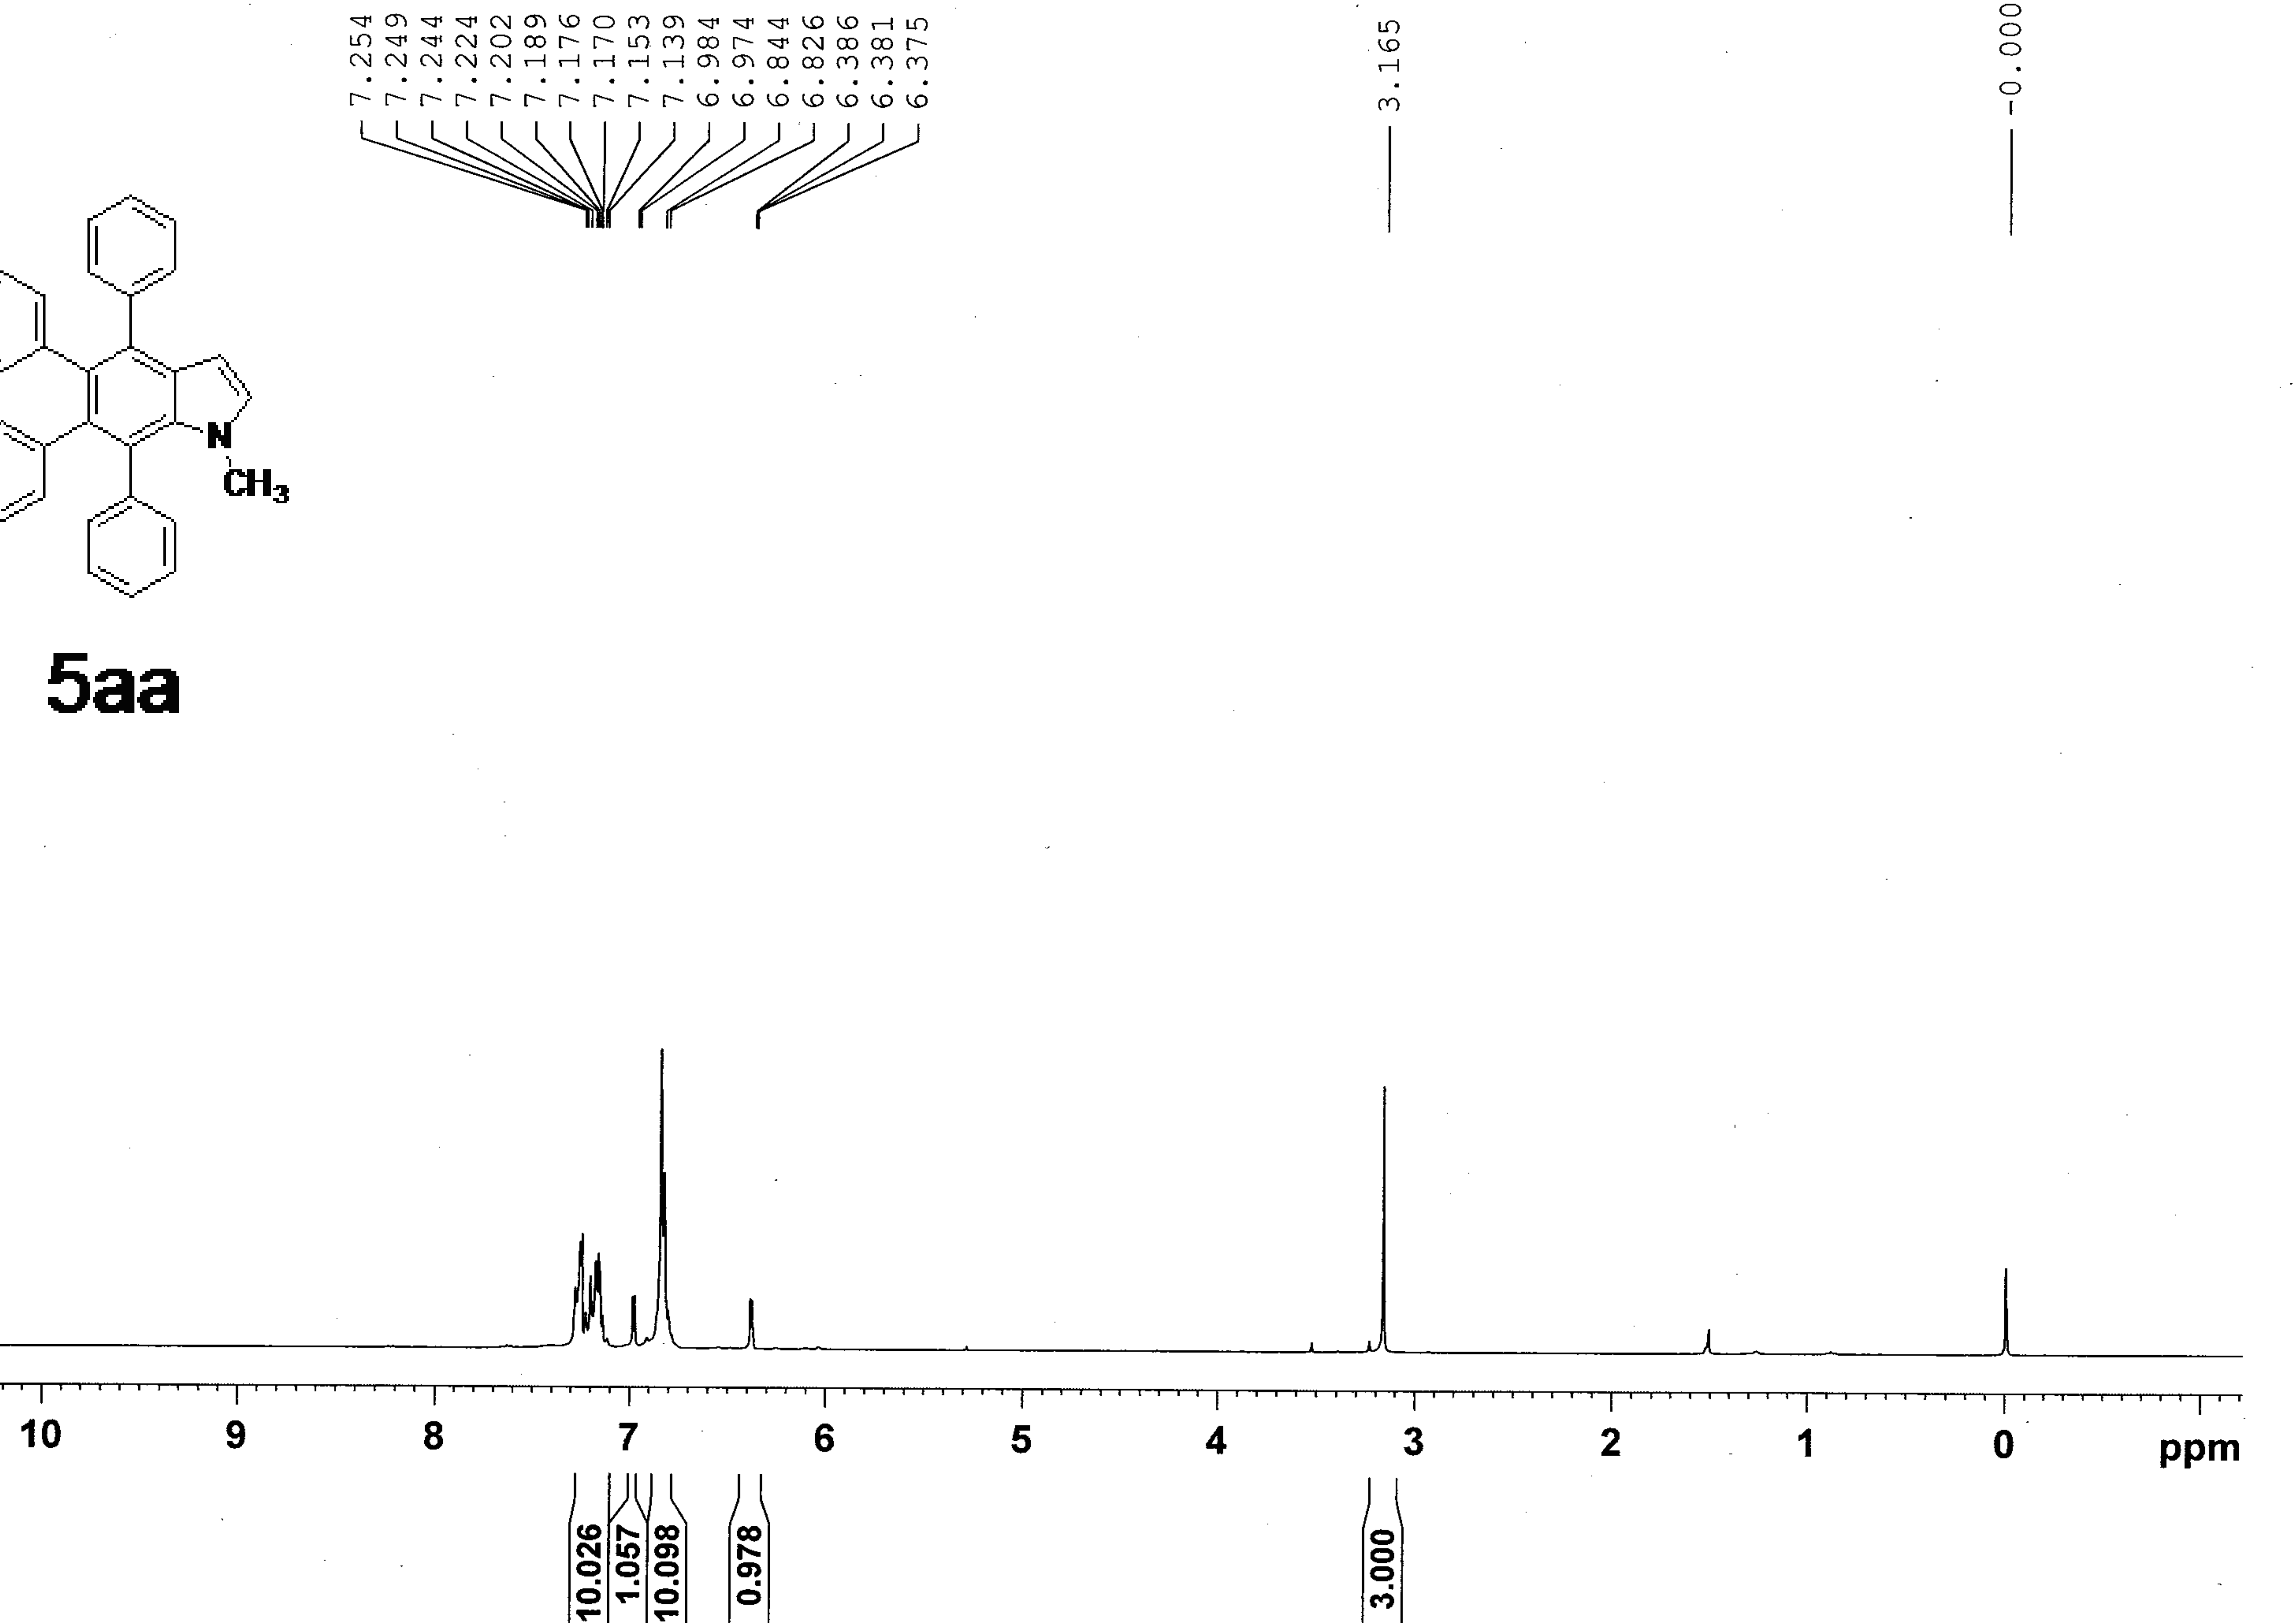

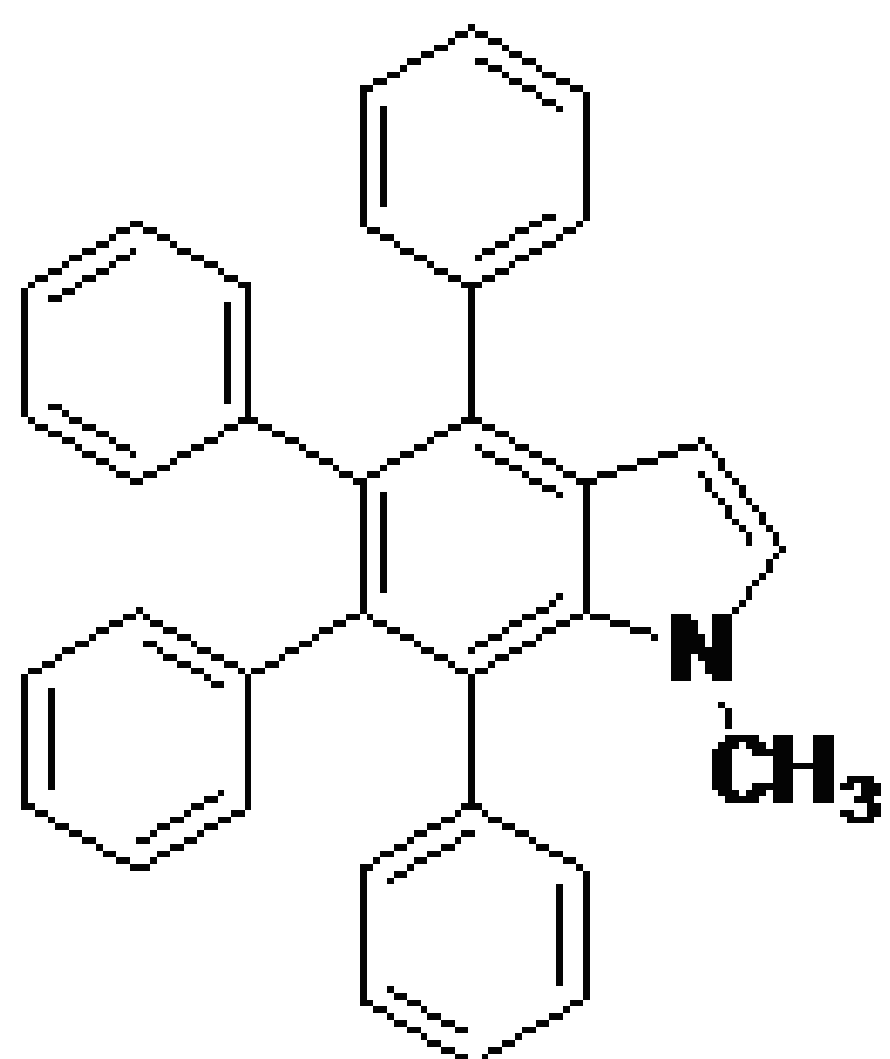

**5aa**

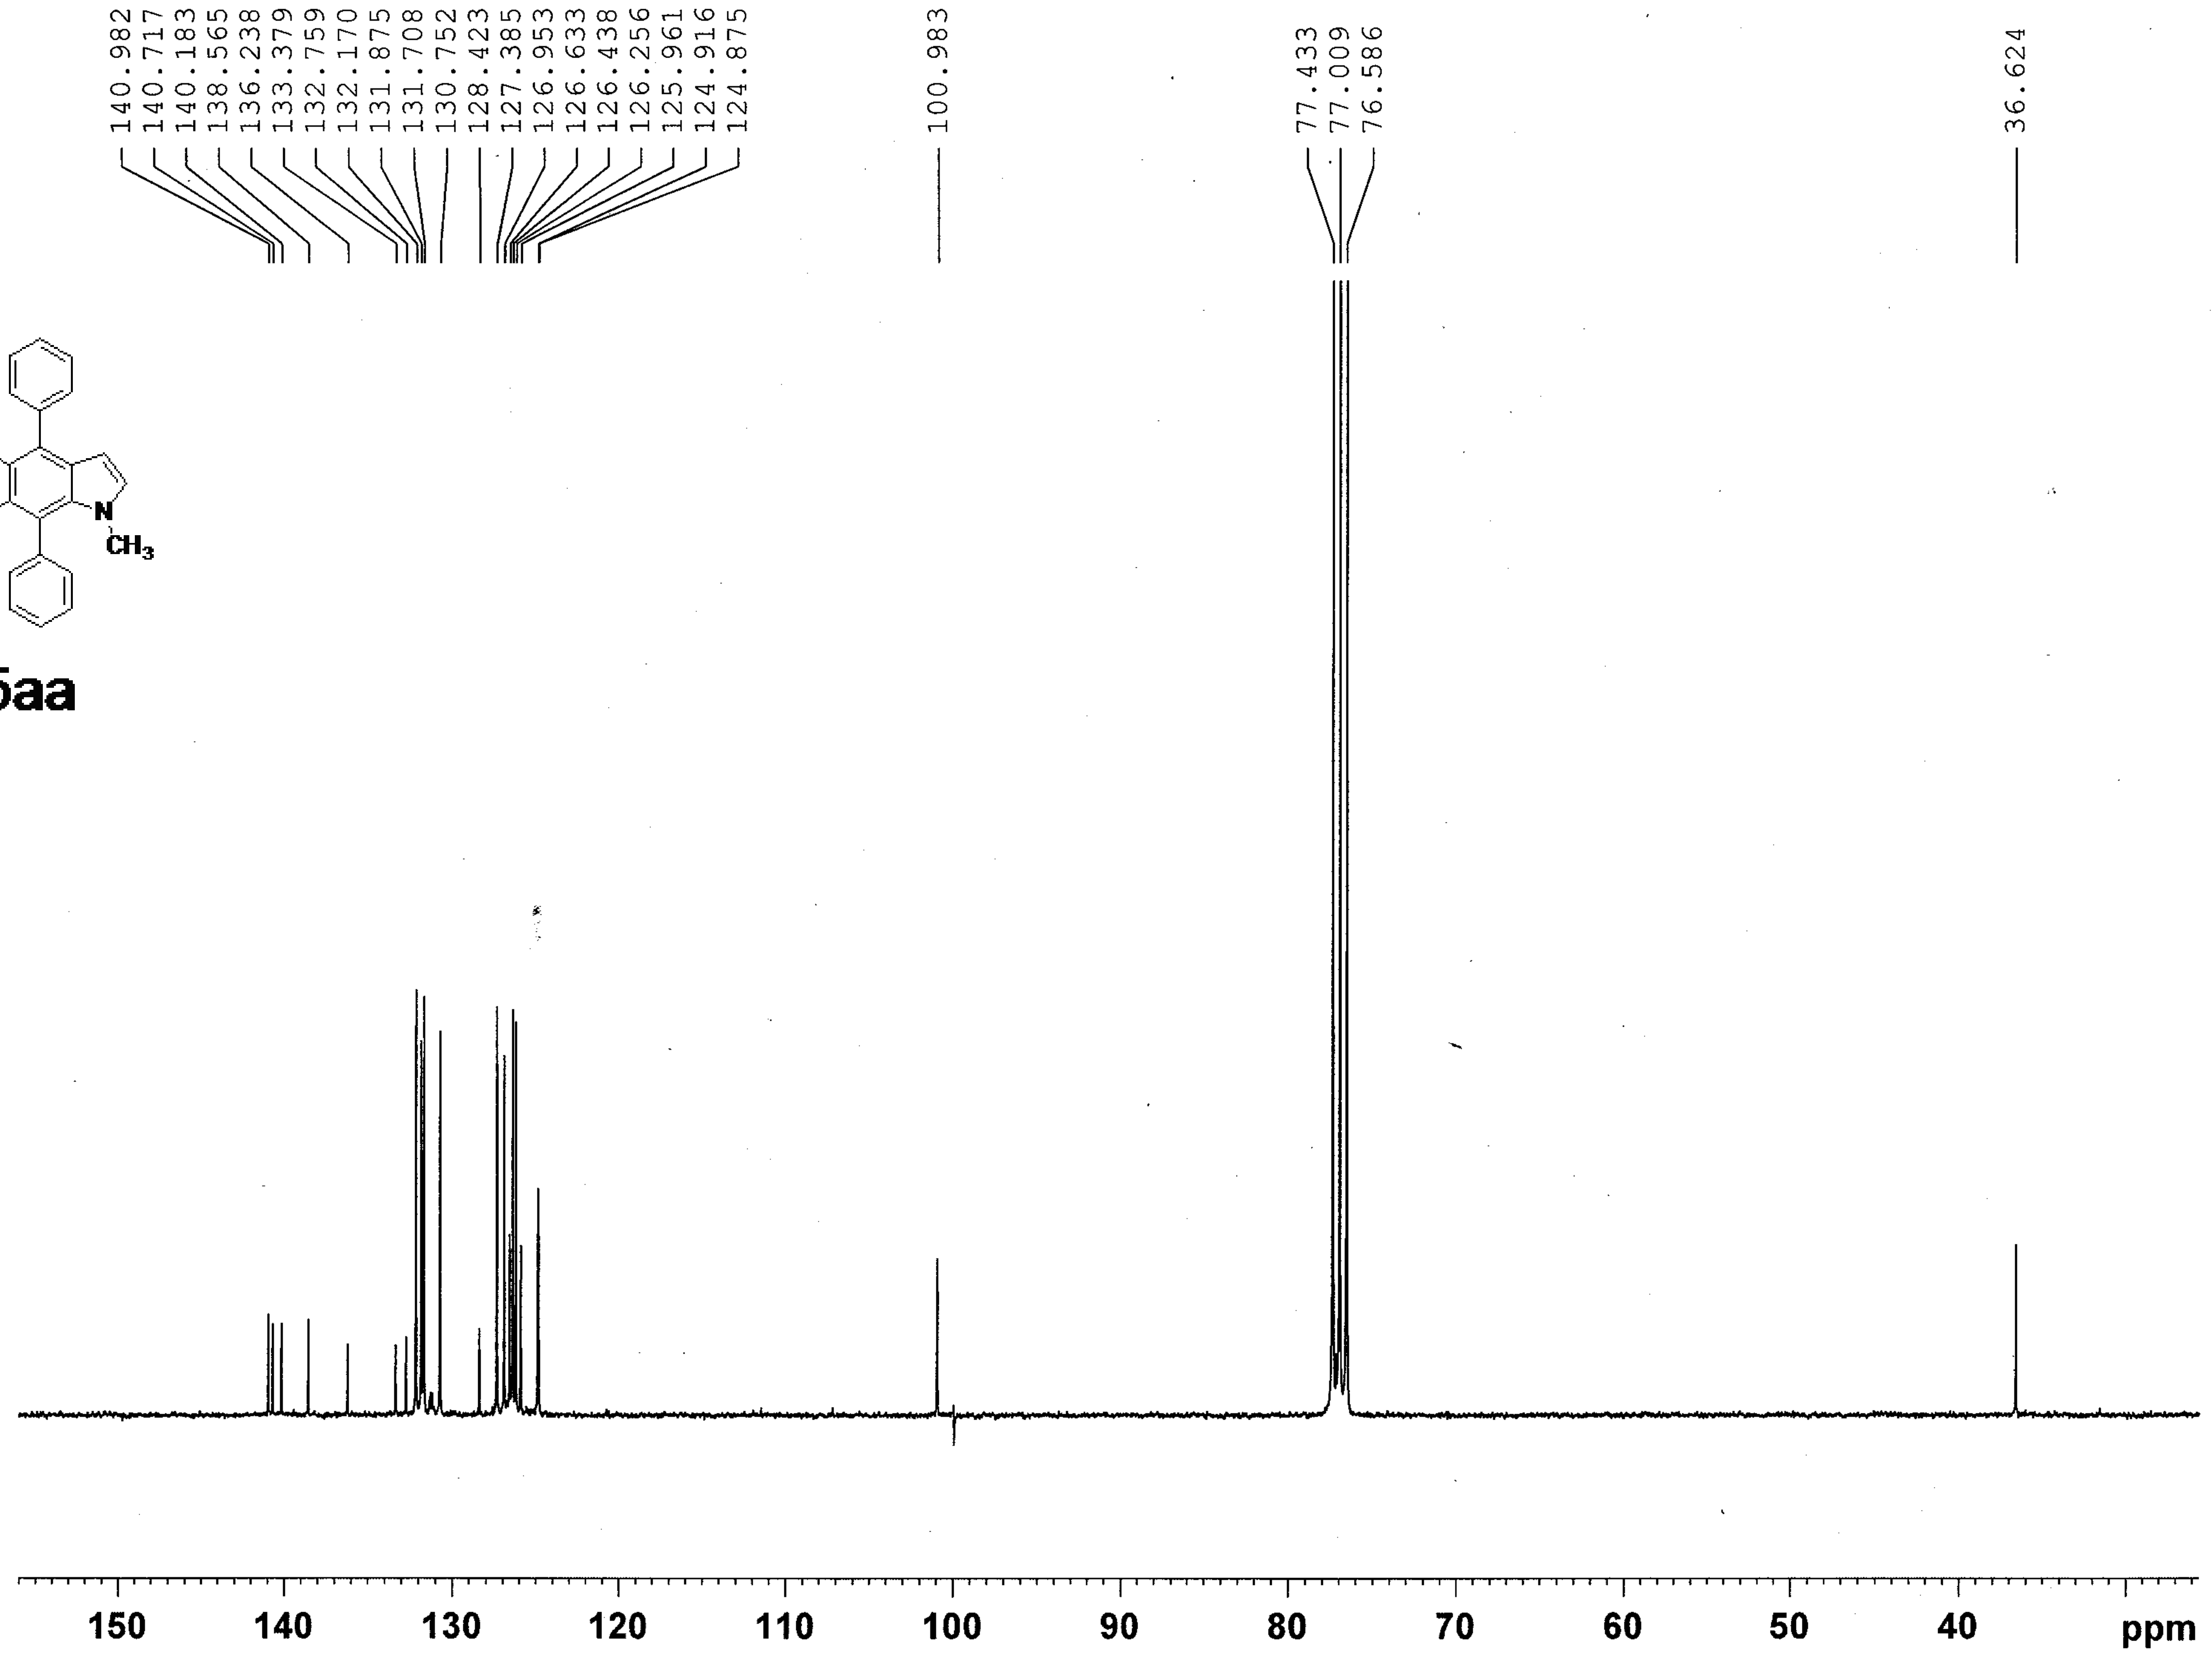



huanghn300p3

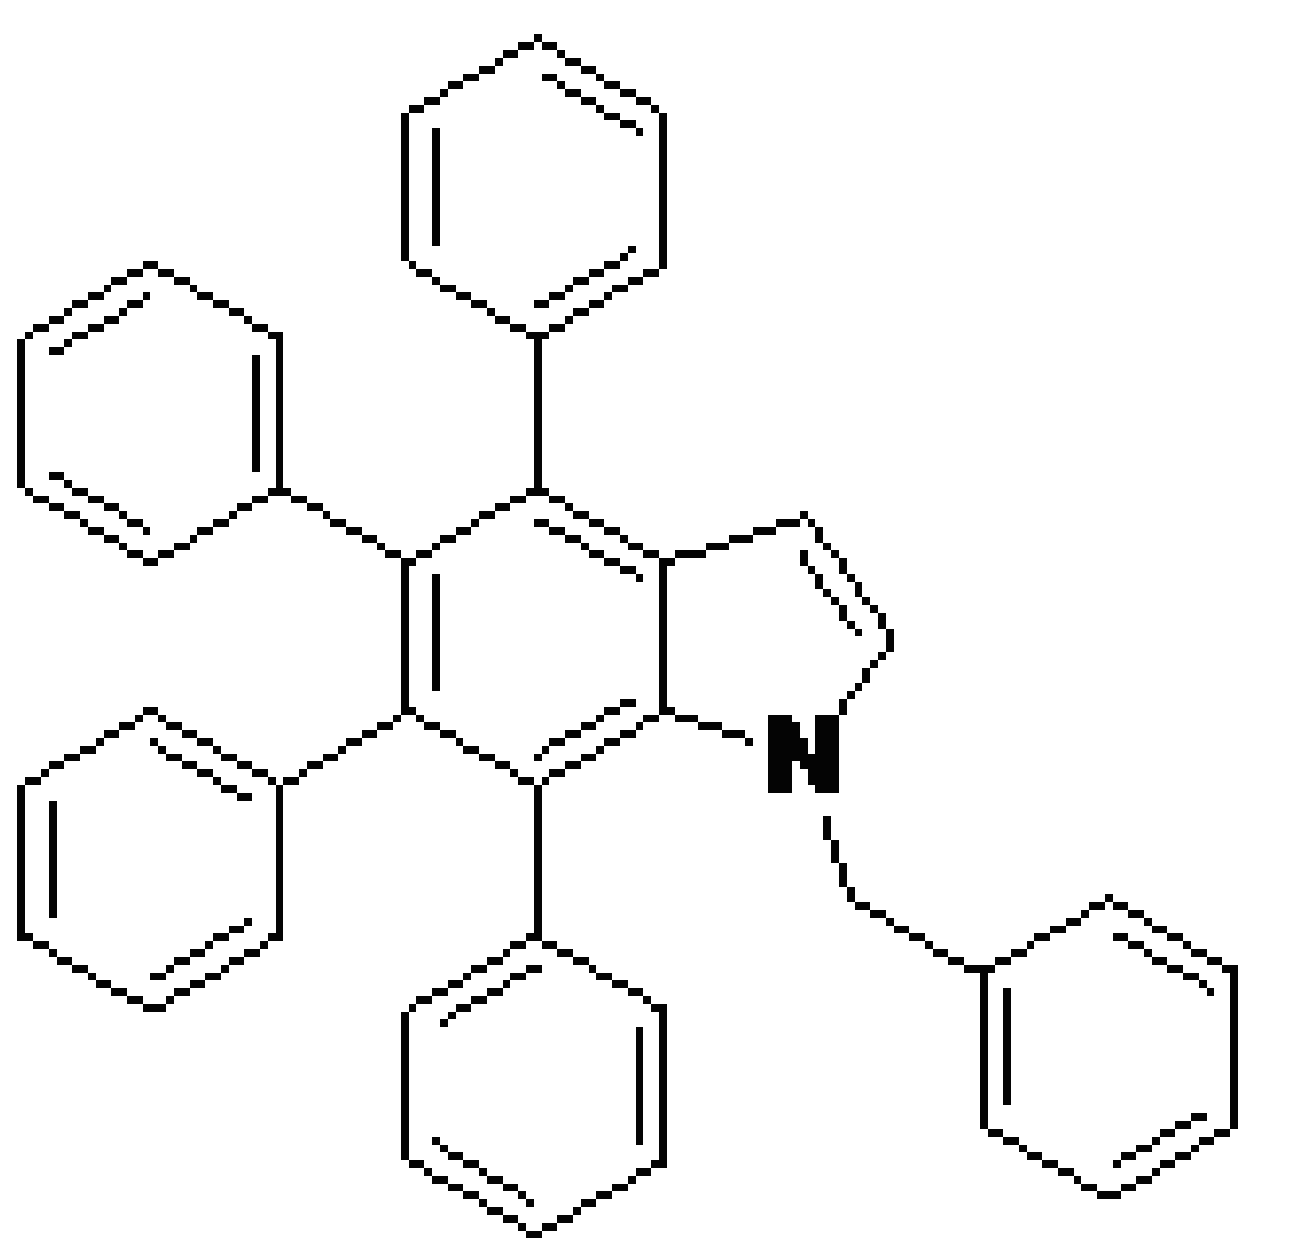

5ba

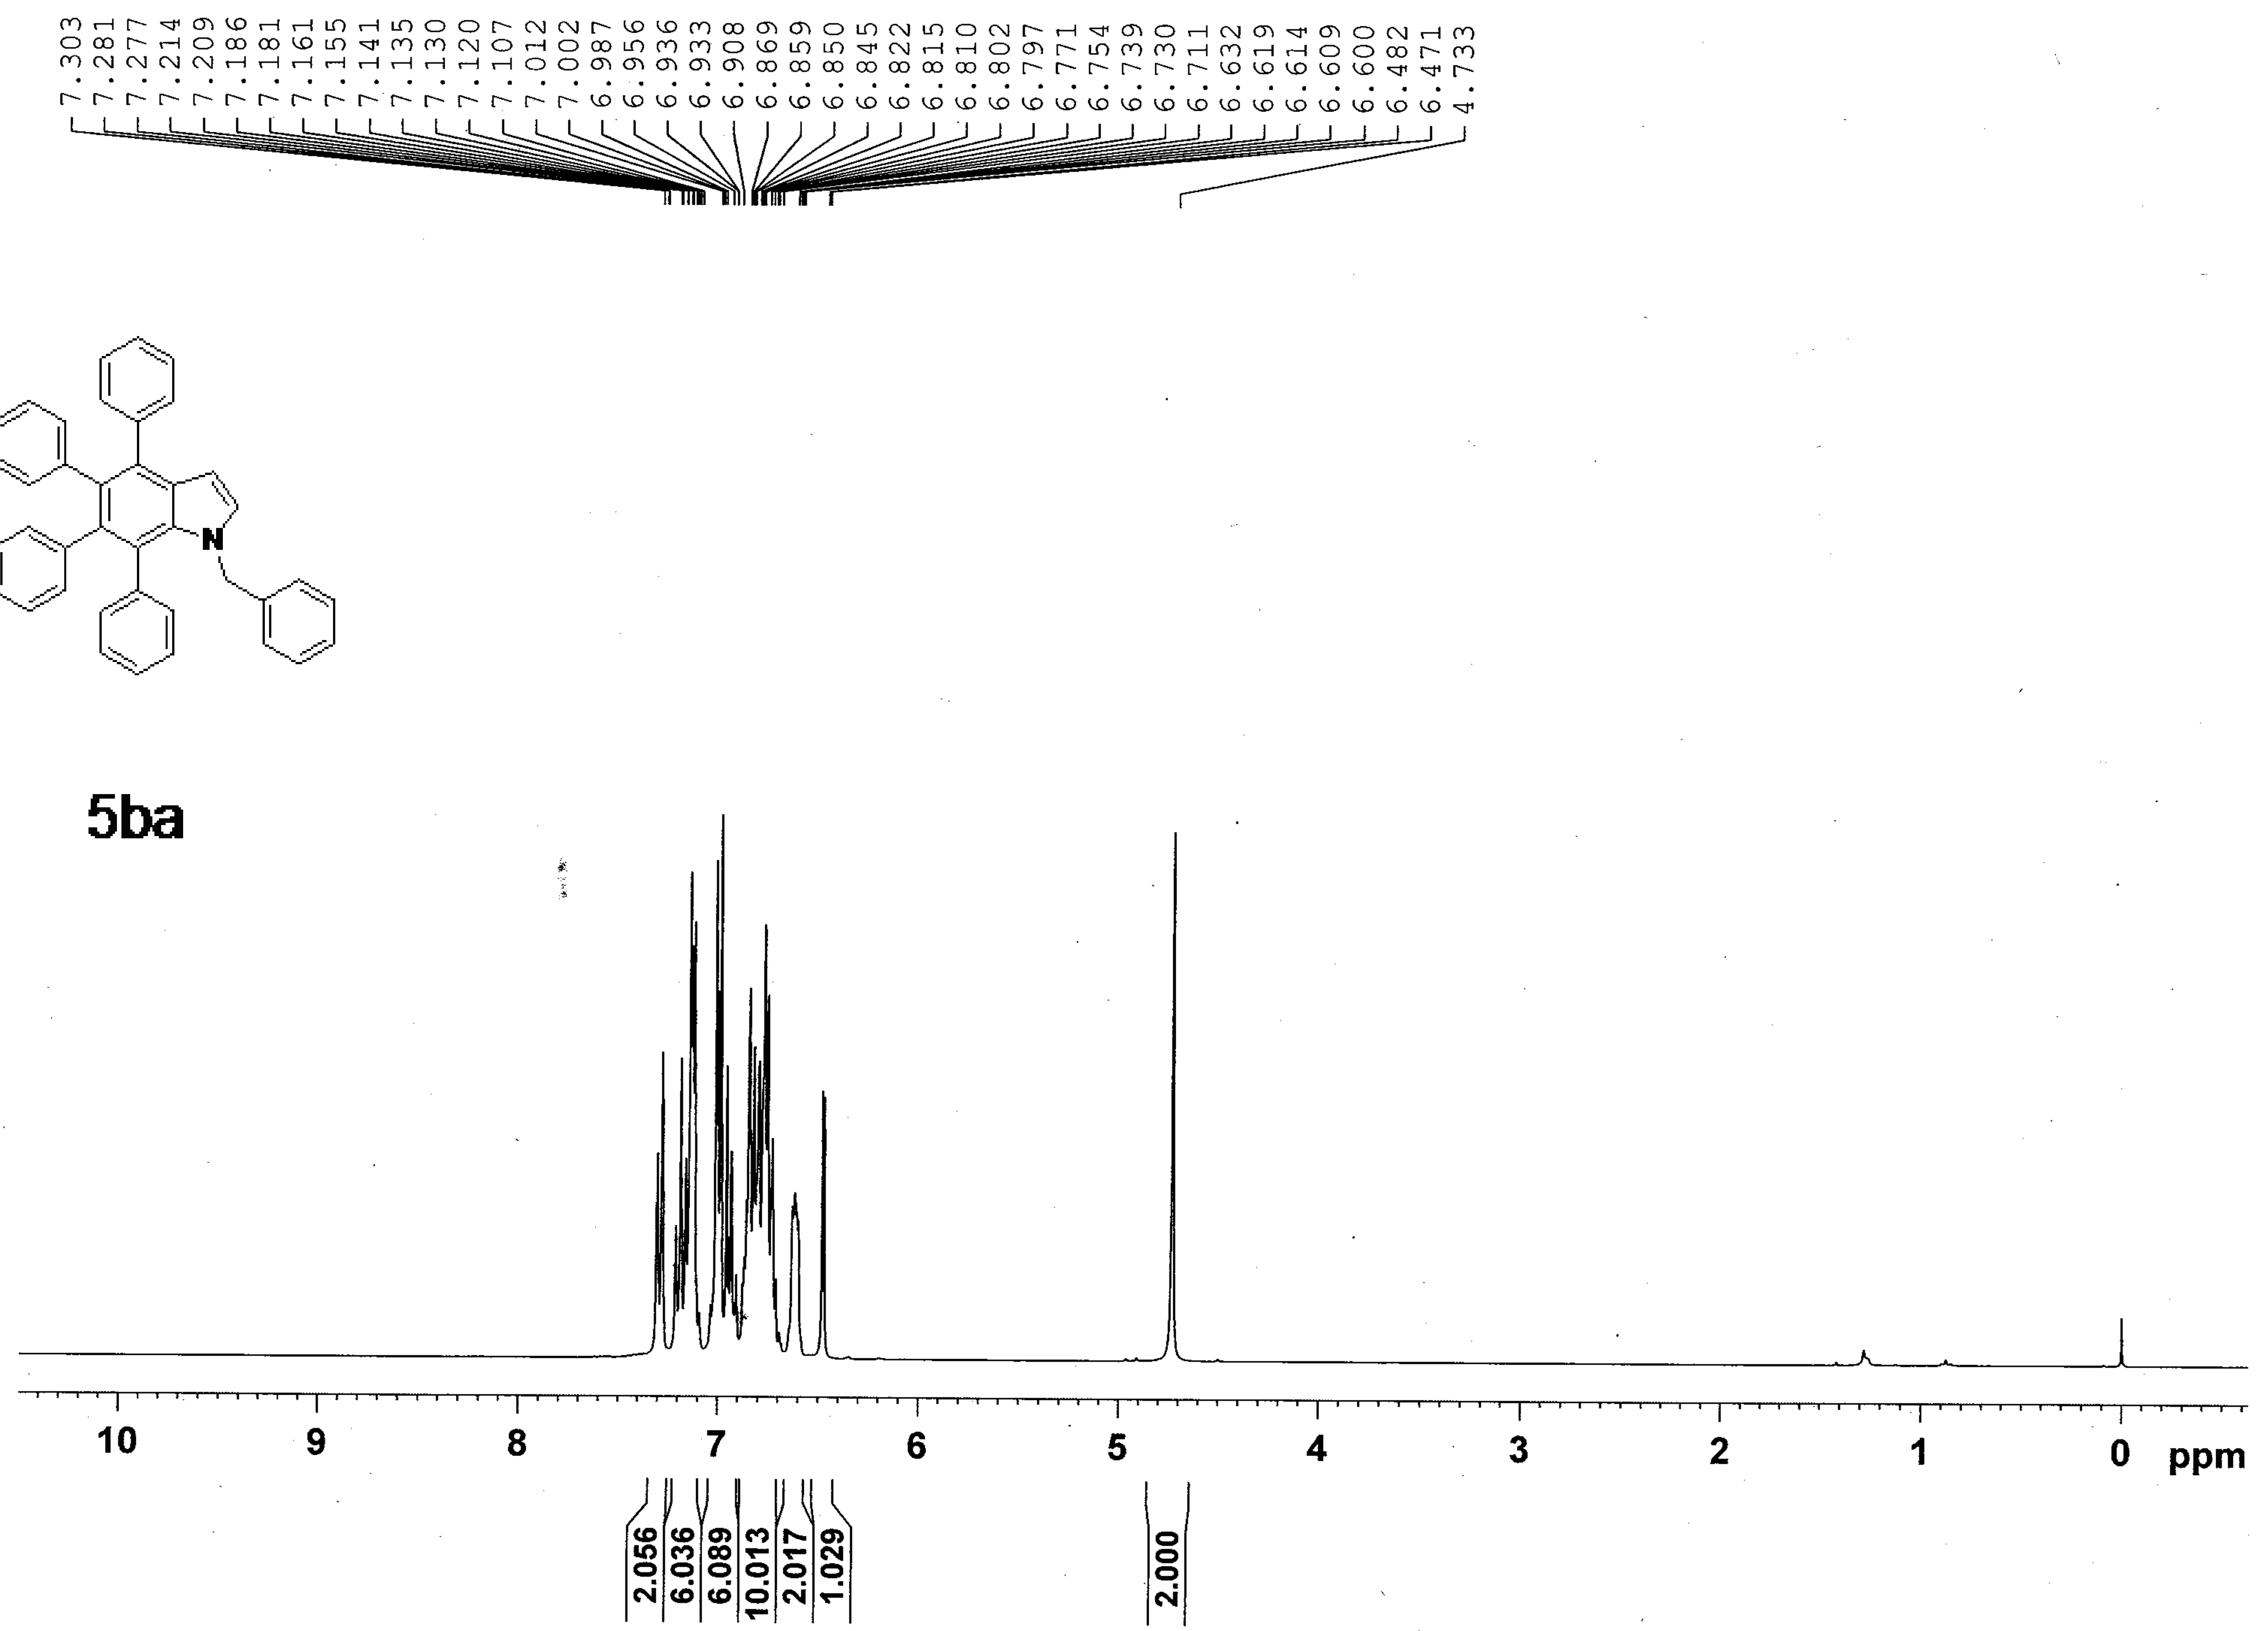

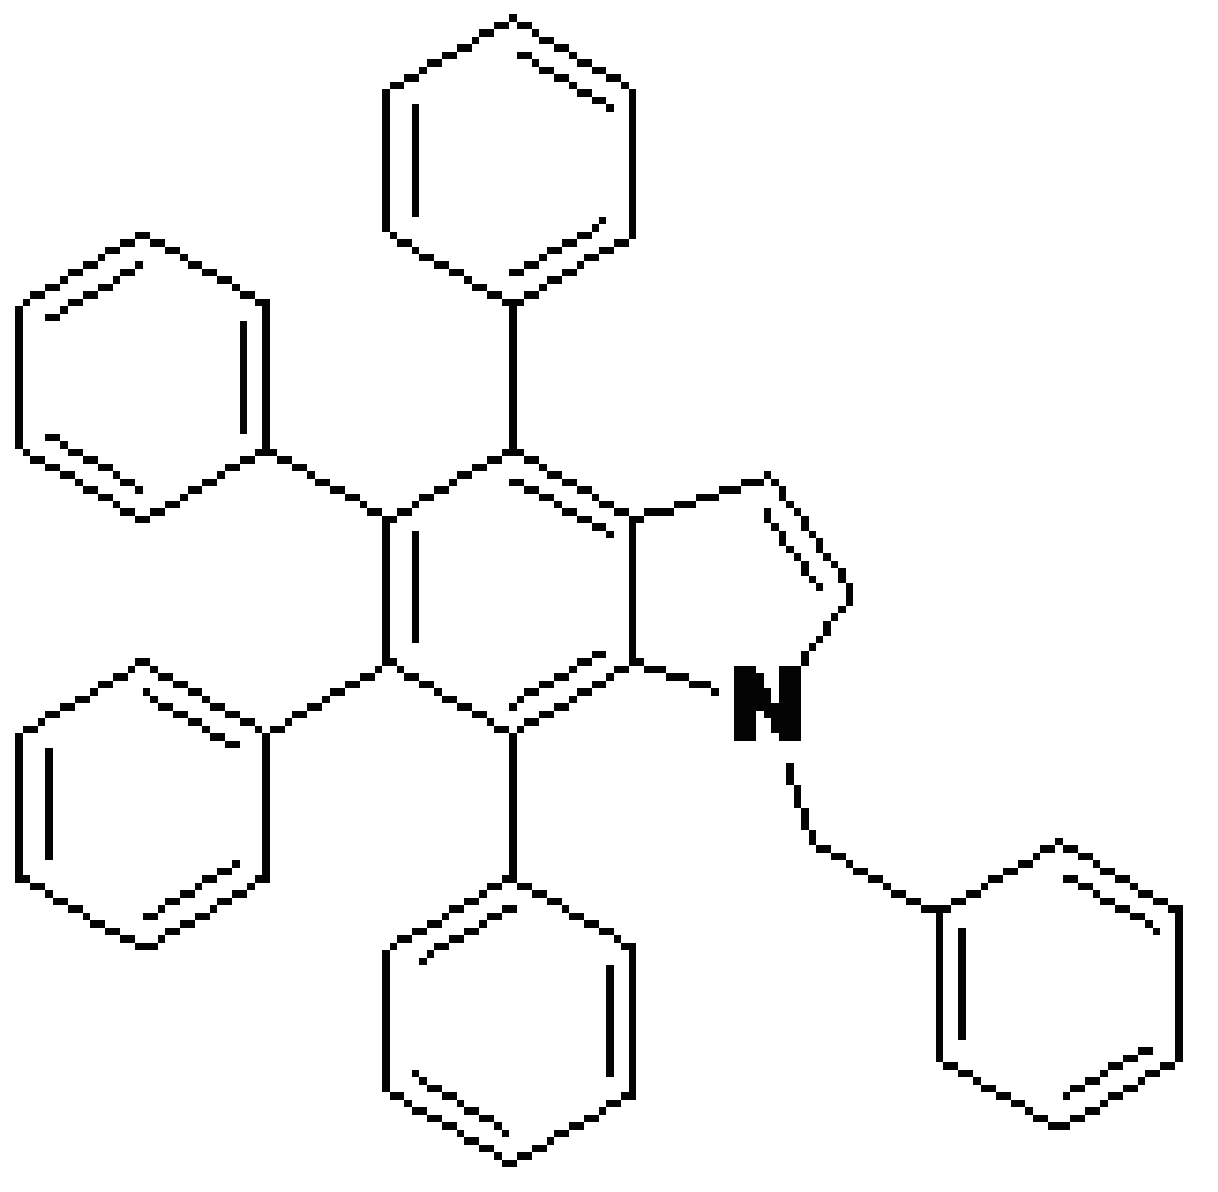

5ba

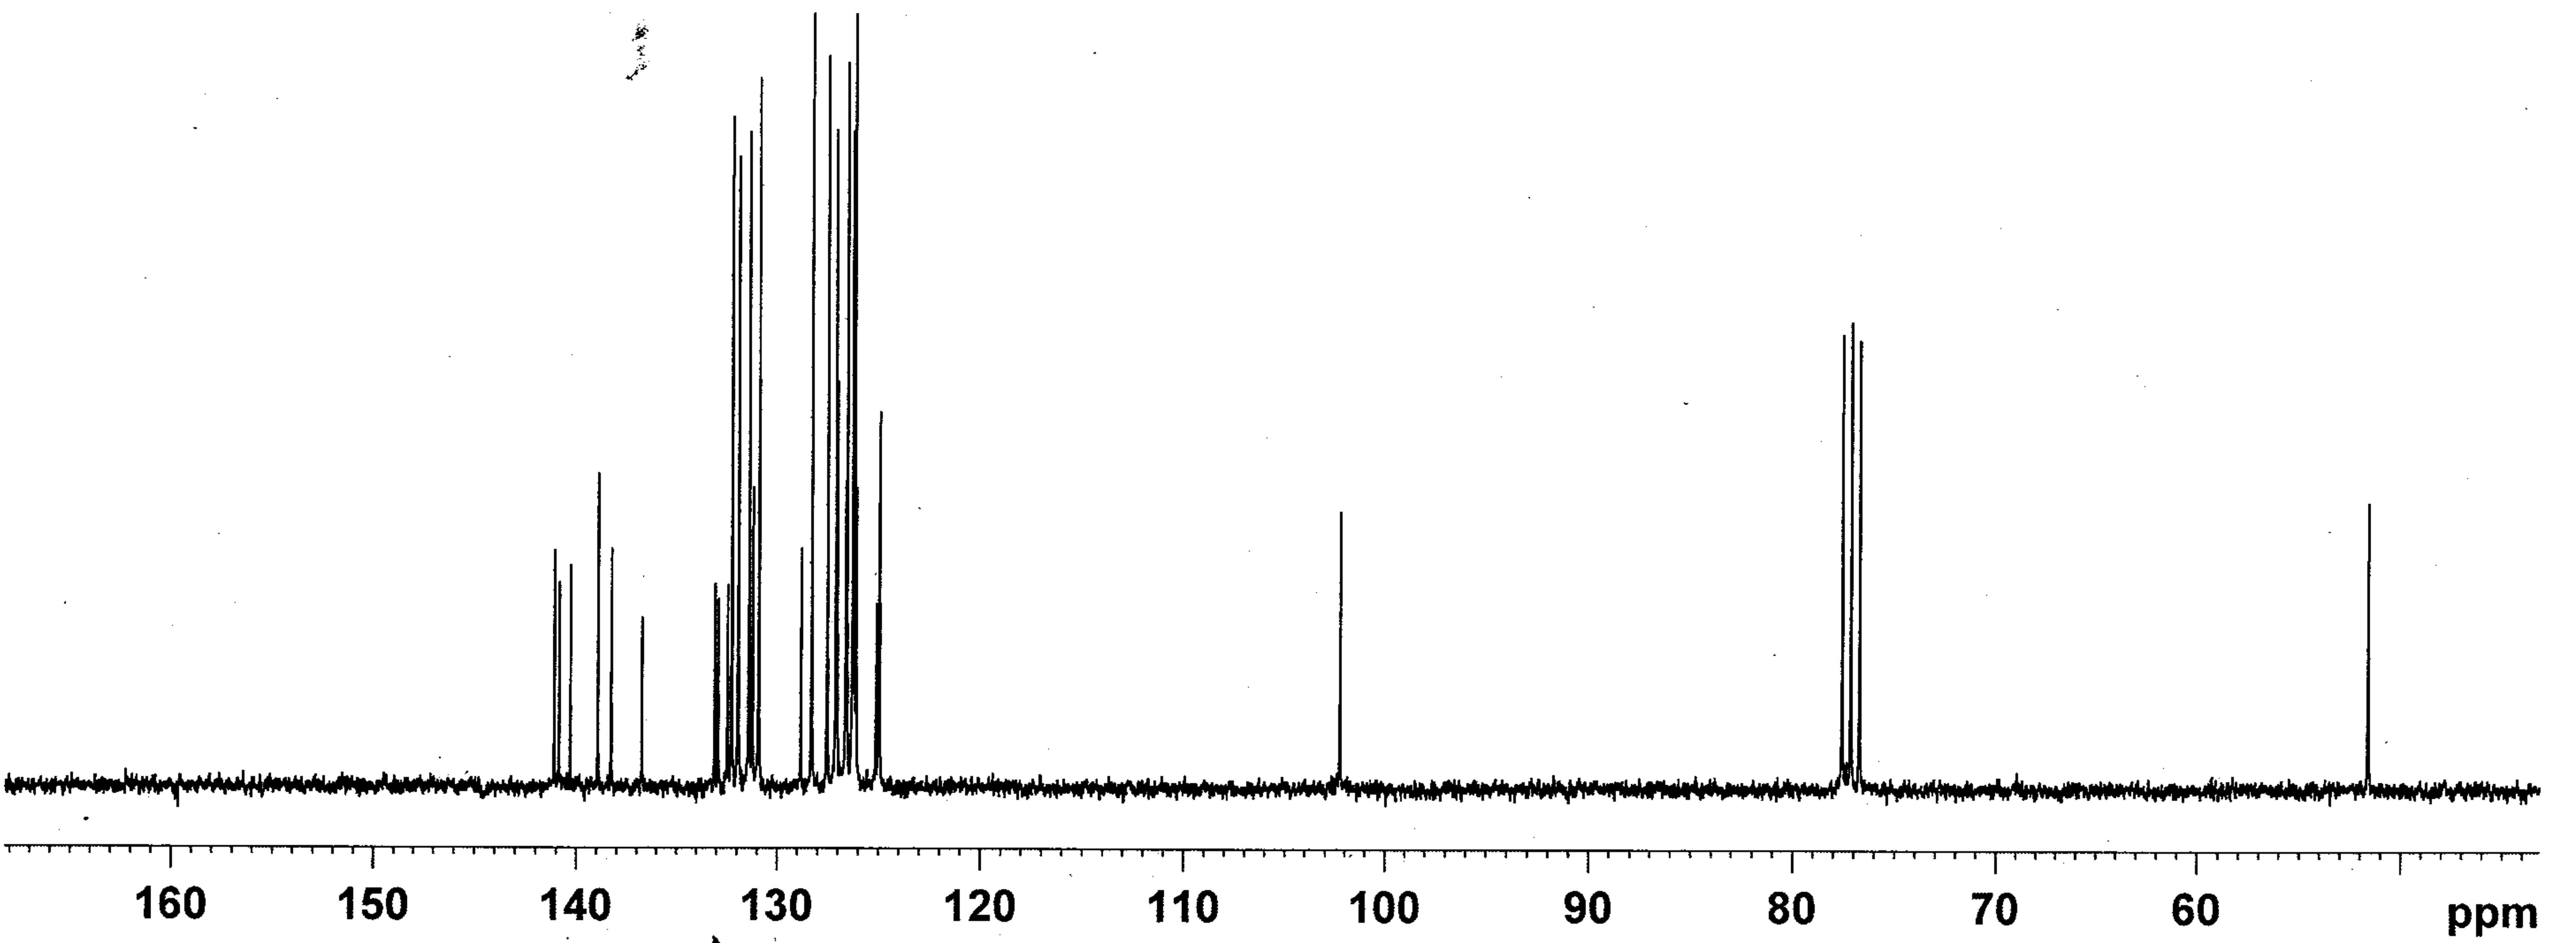

141.088  
140.849  
140.297  
138.929  
138.271  
136.731  
133.103  
132.929  
132.469  
132.260  
131.940  
131.421  
131.238  
130.926  
128.839  
128.316  
127.542  
127.131  
127.052  
126.647  
126.579  
126.313  
126.219  
126.122  
125.152  
125.002  
124.984

102.271

77.586  
77.163  
76.739

51.618

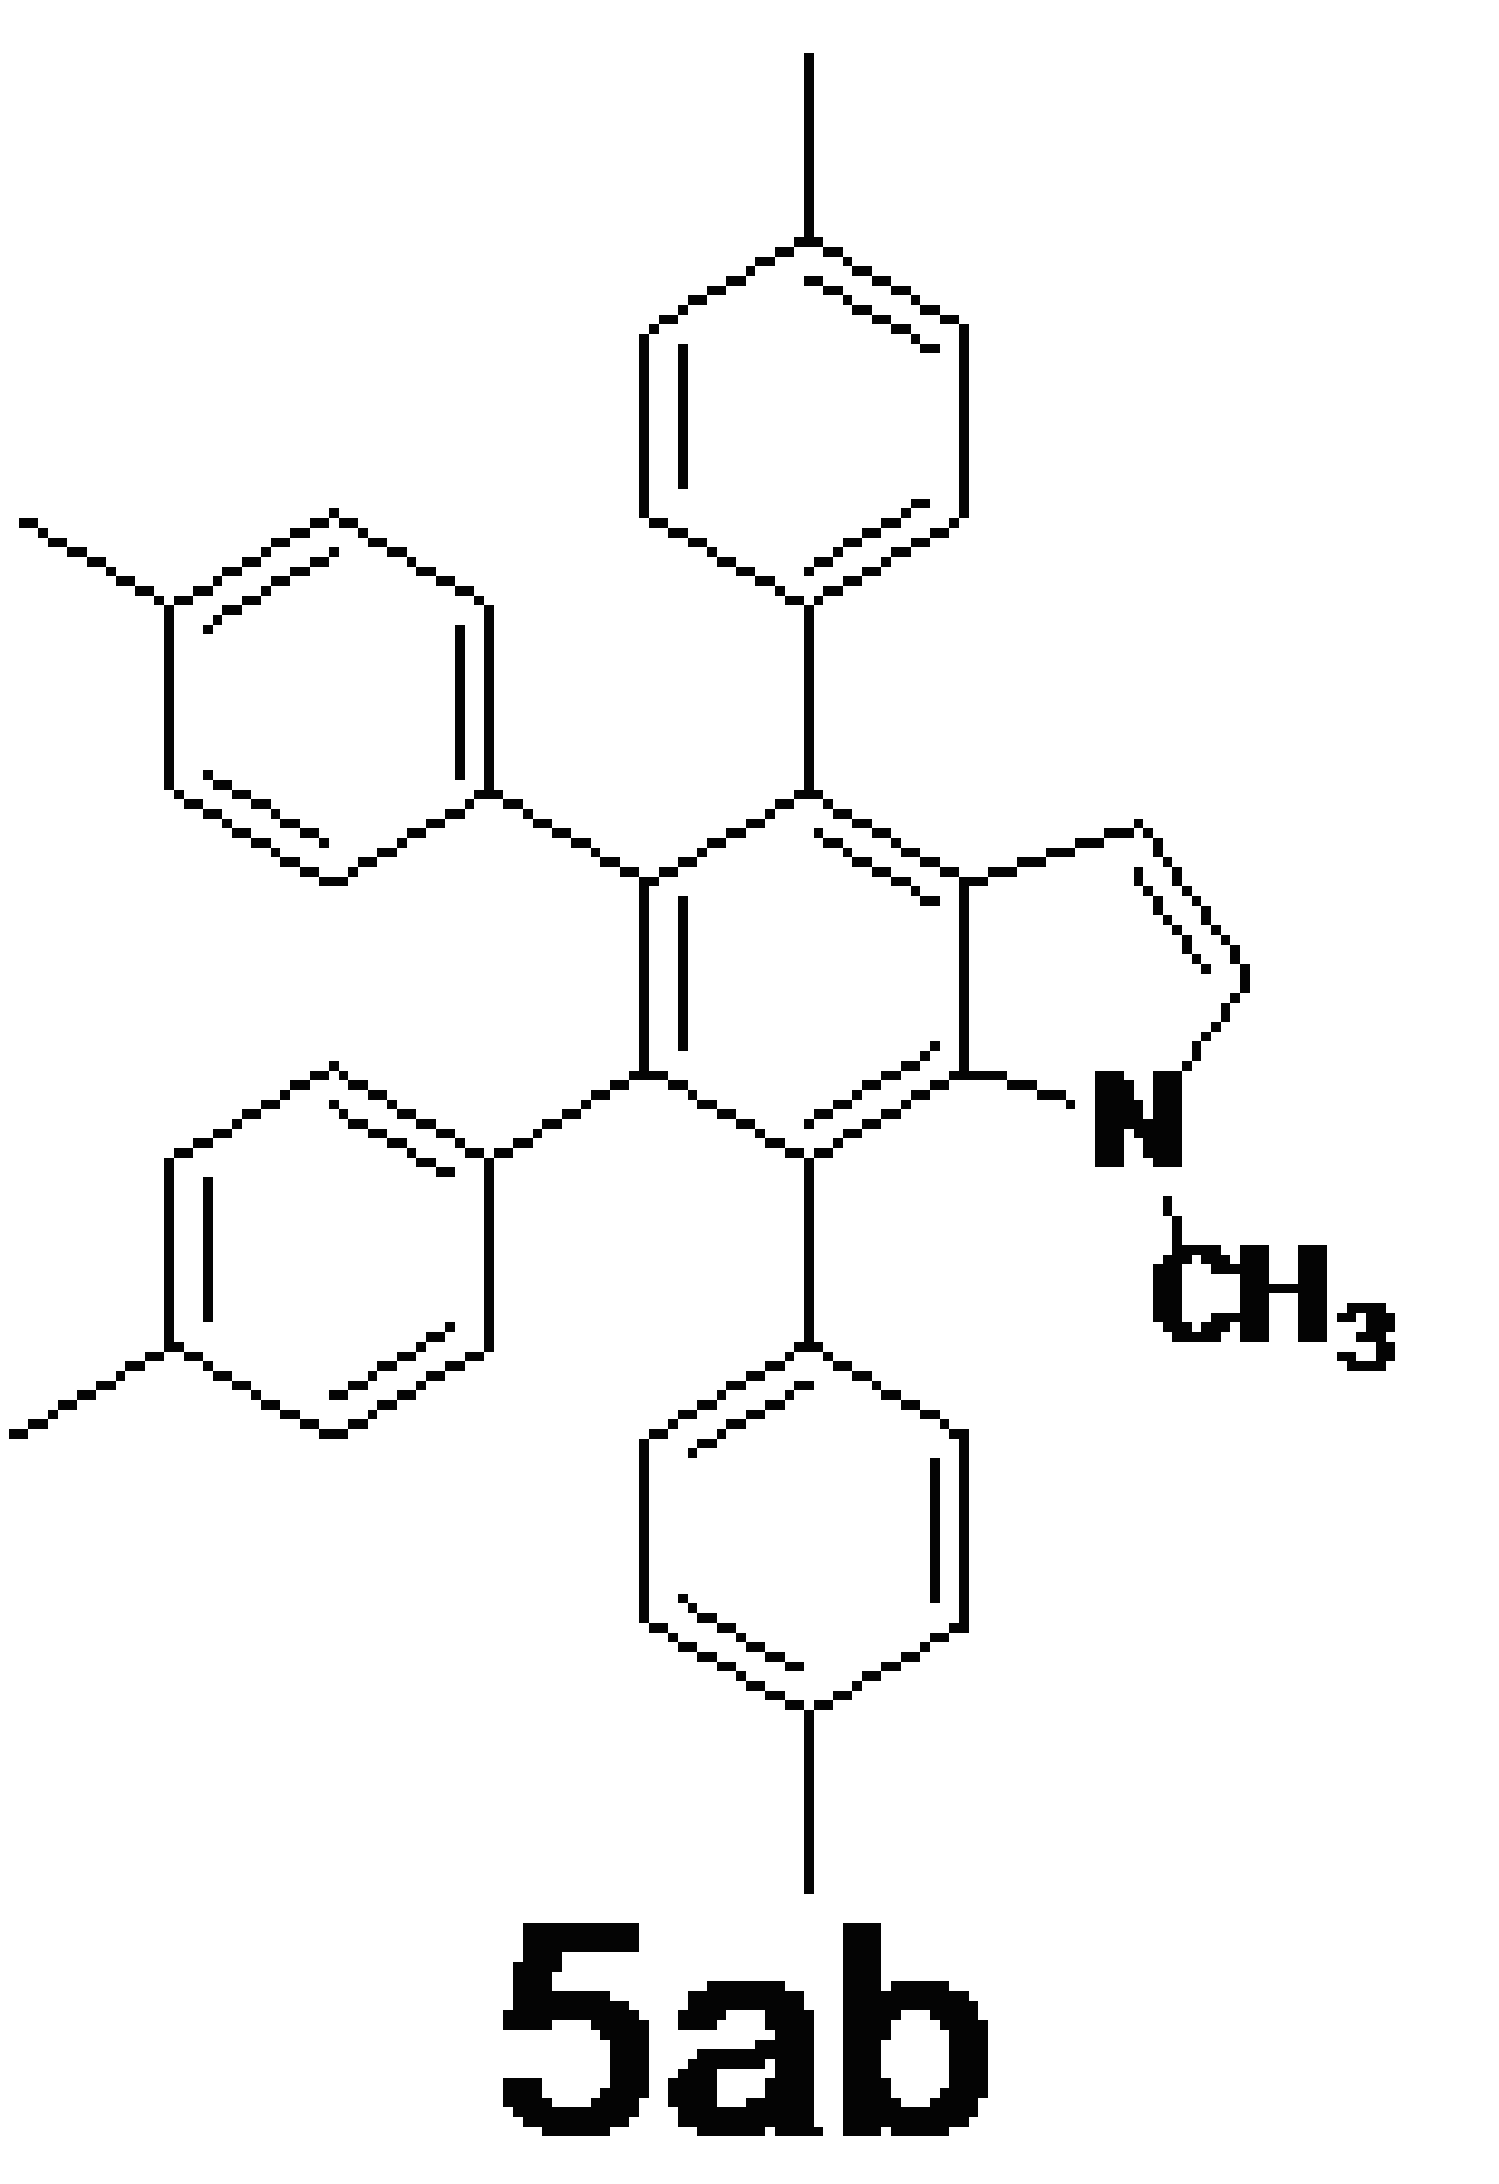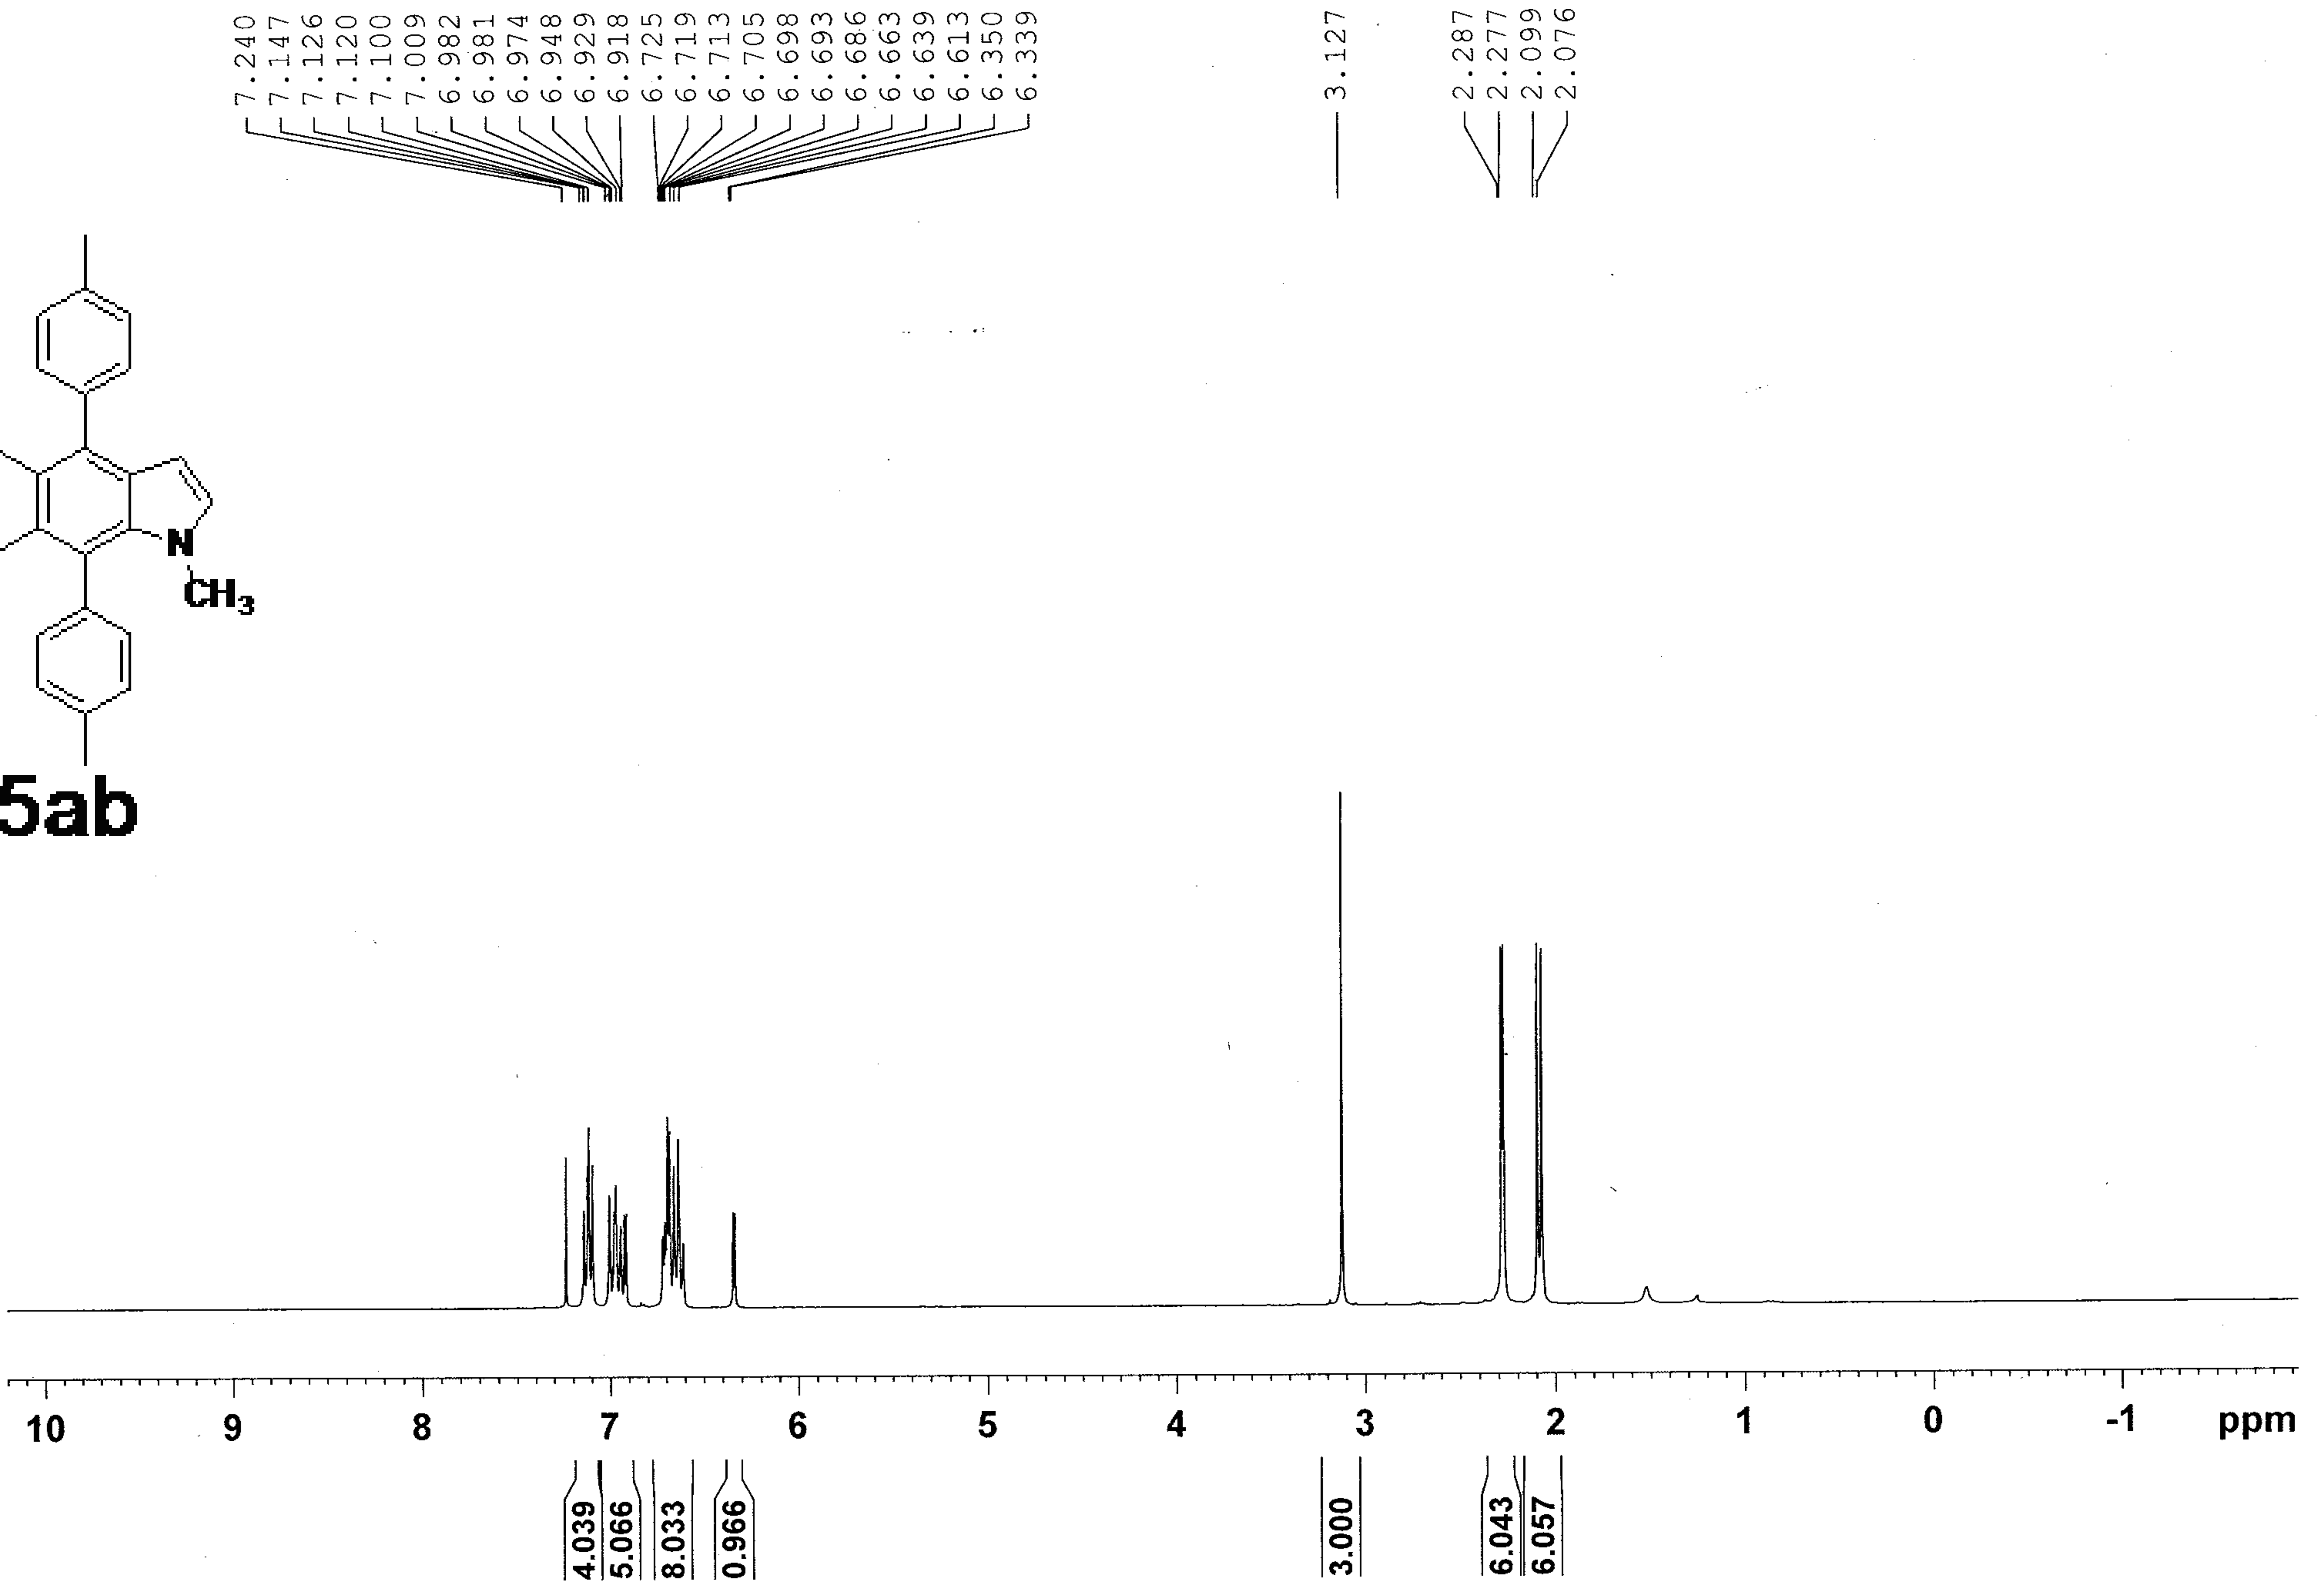

huanghn279 p3 C13CPD

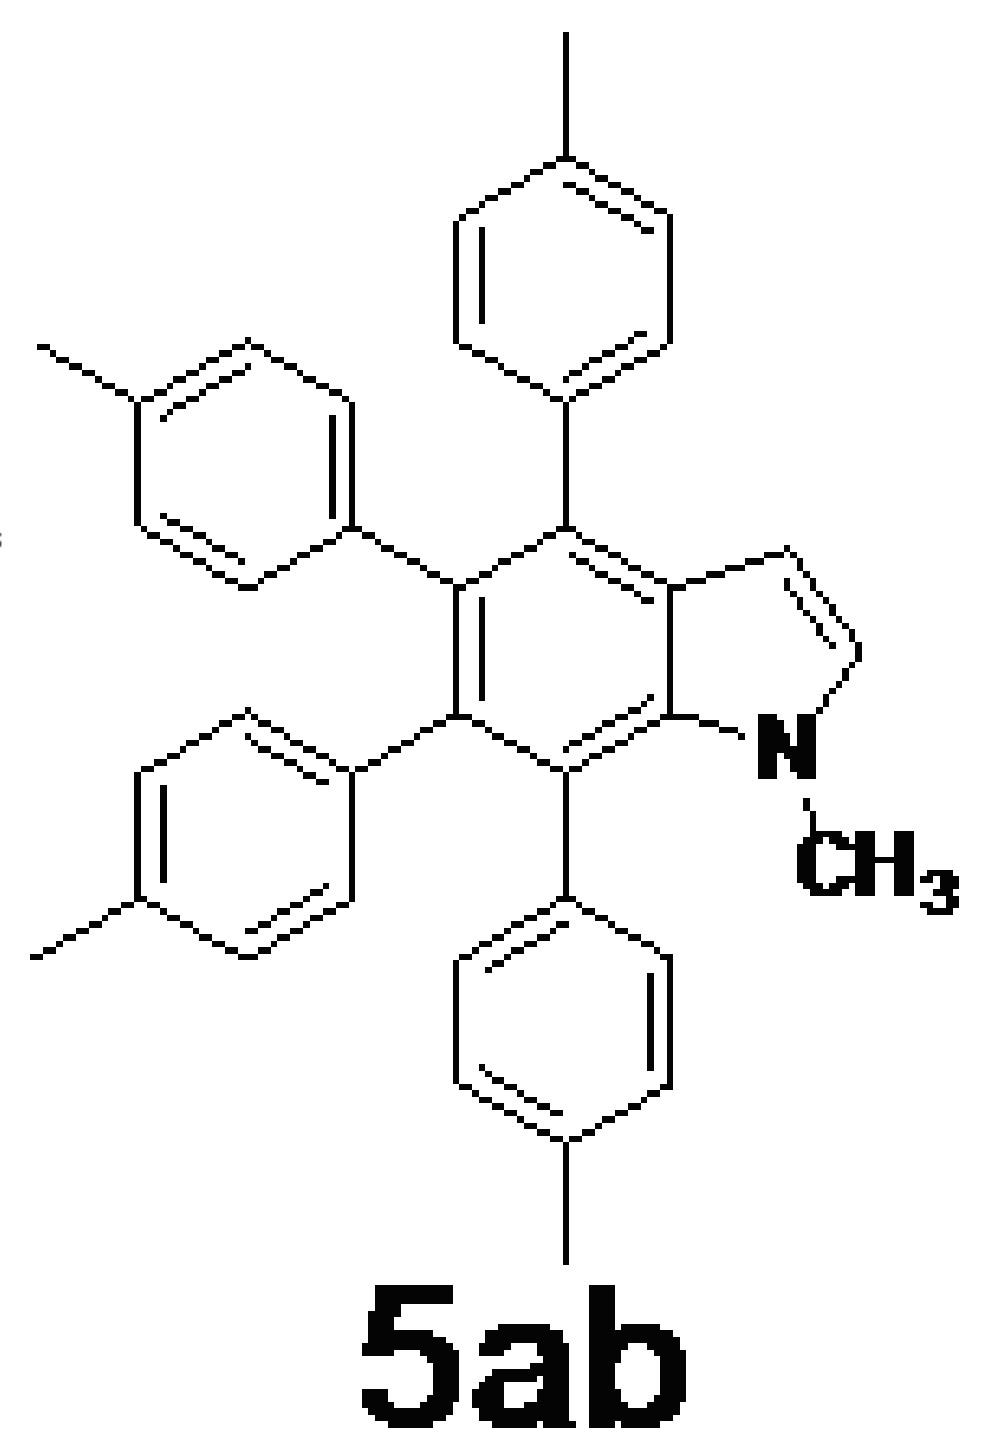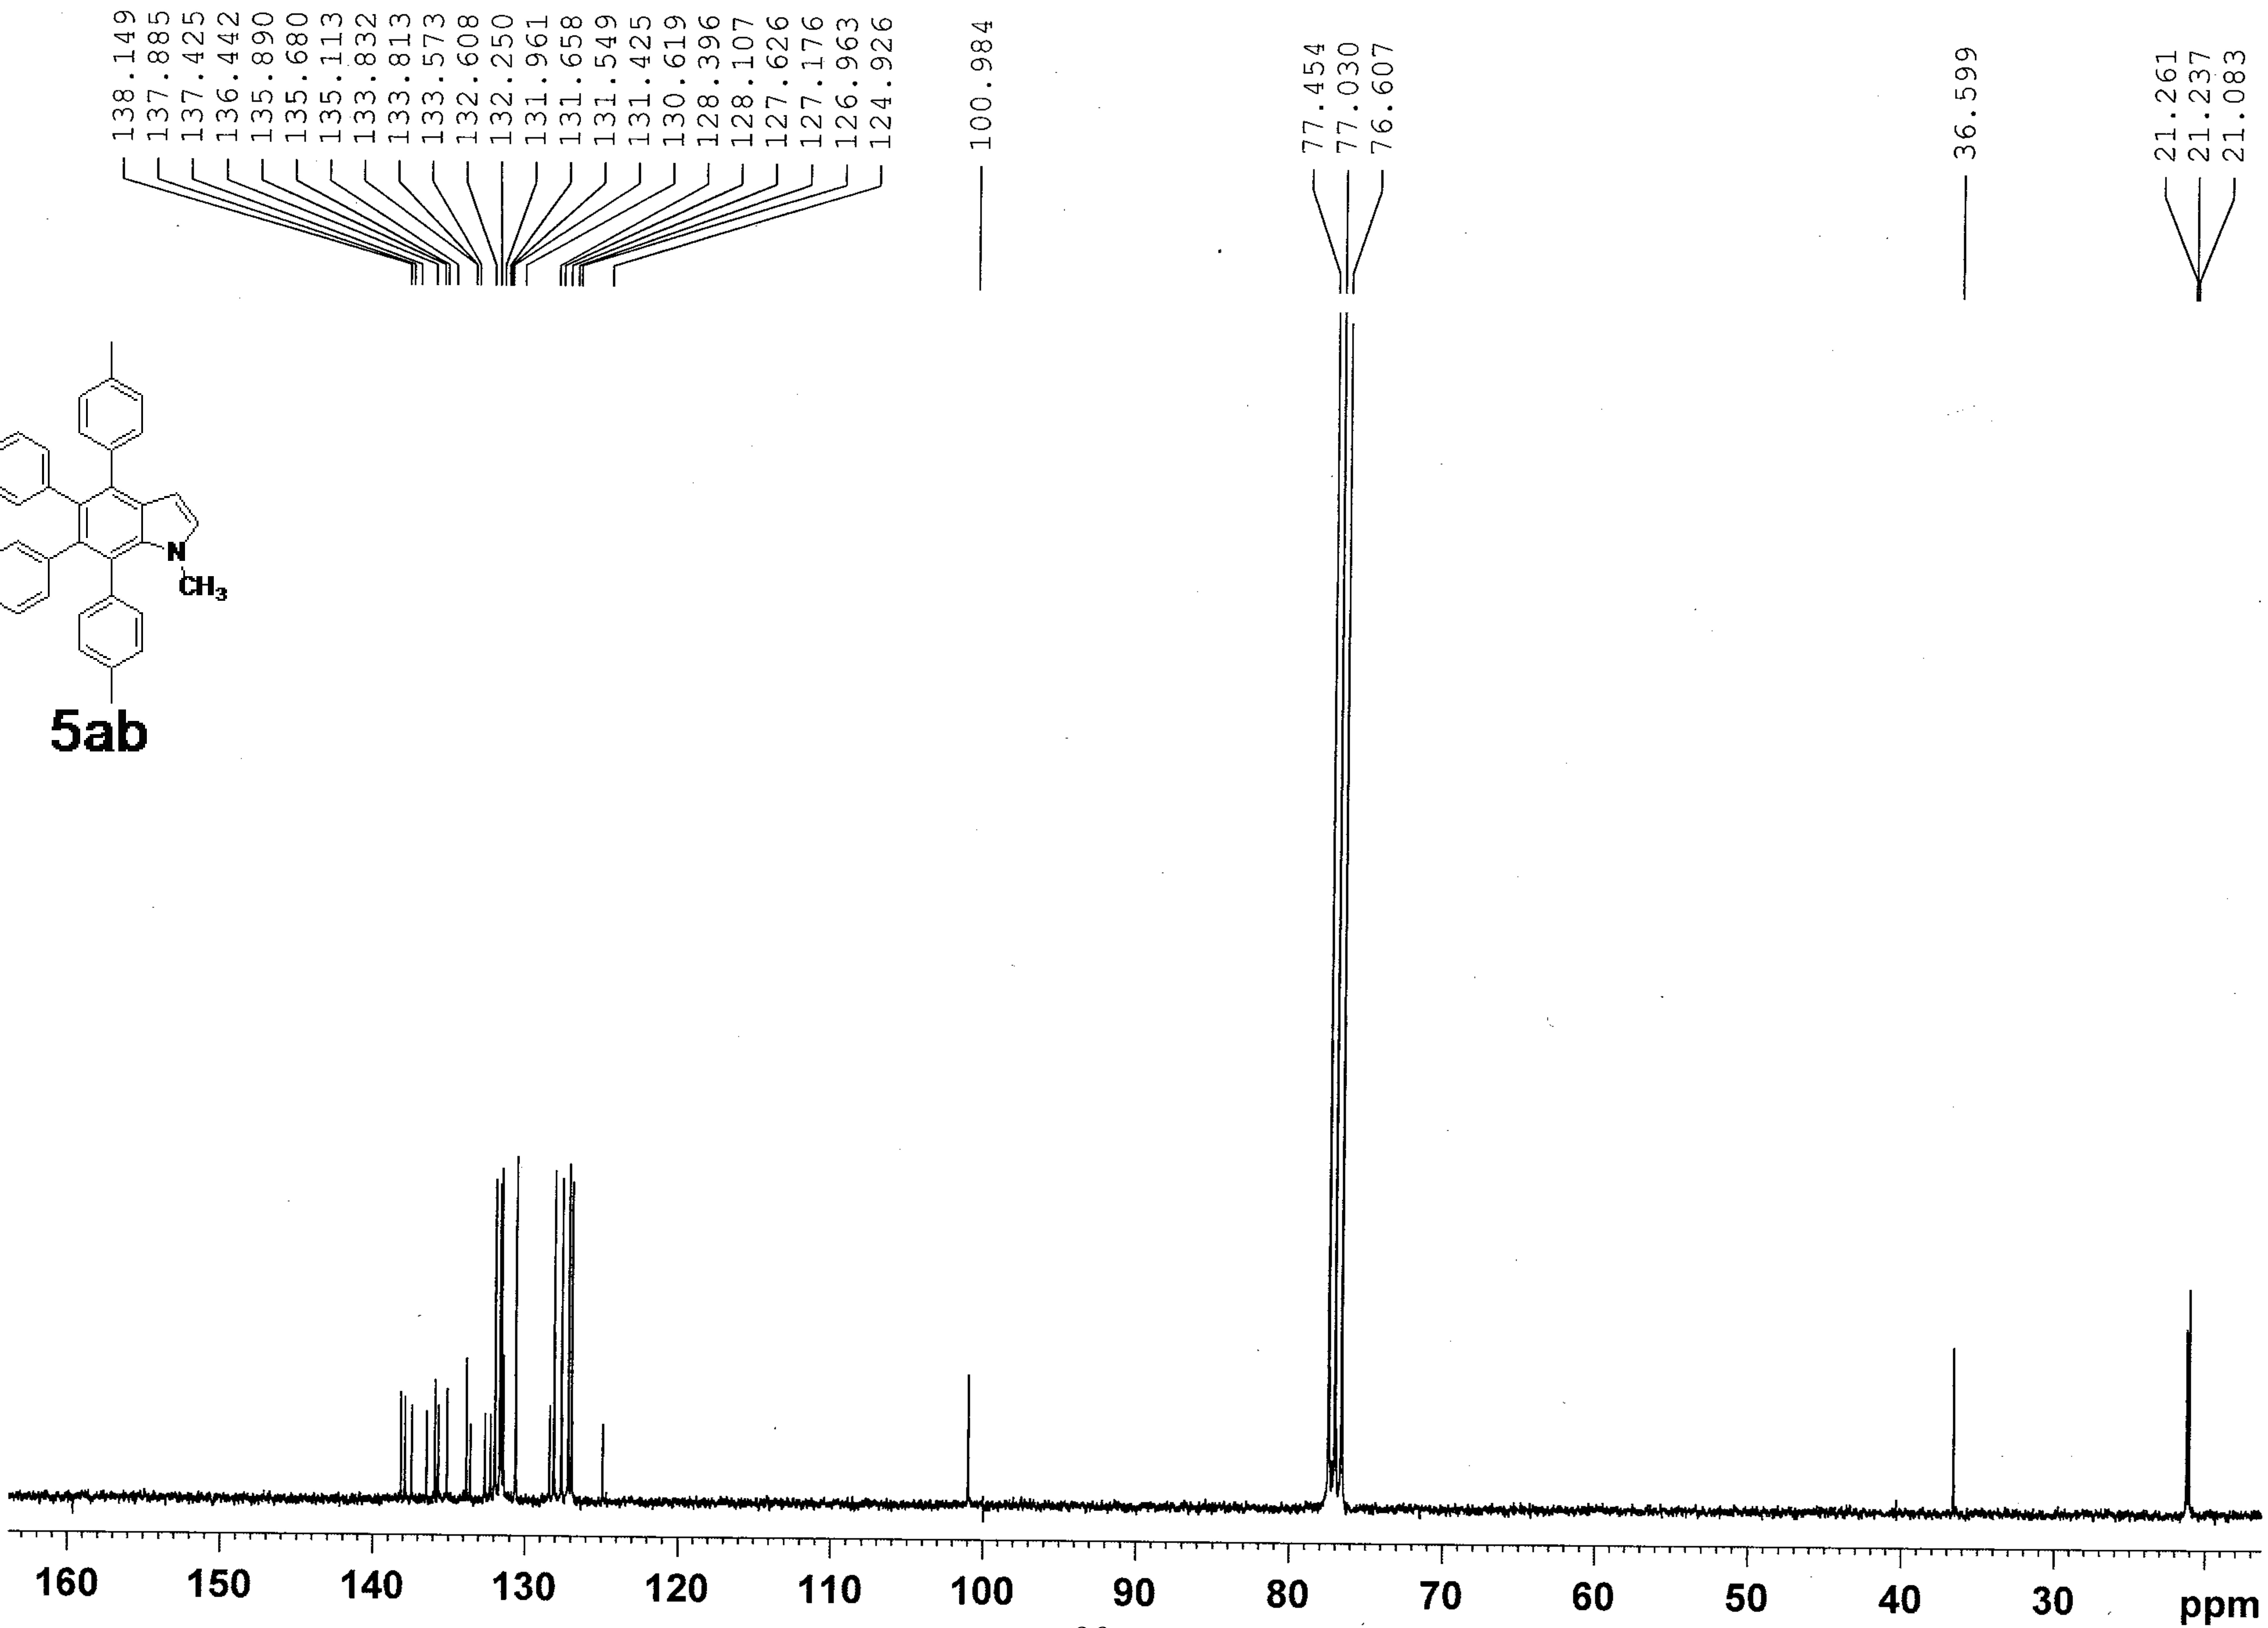

huanghn□p2 PROTON

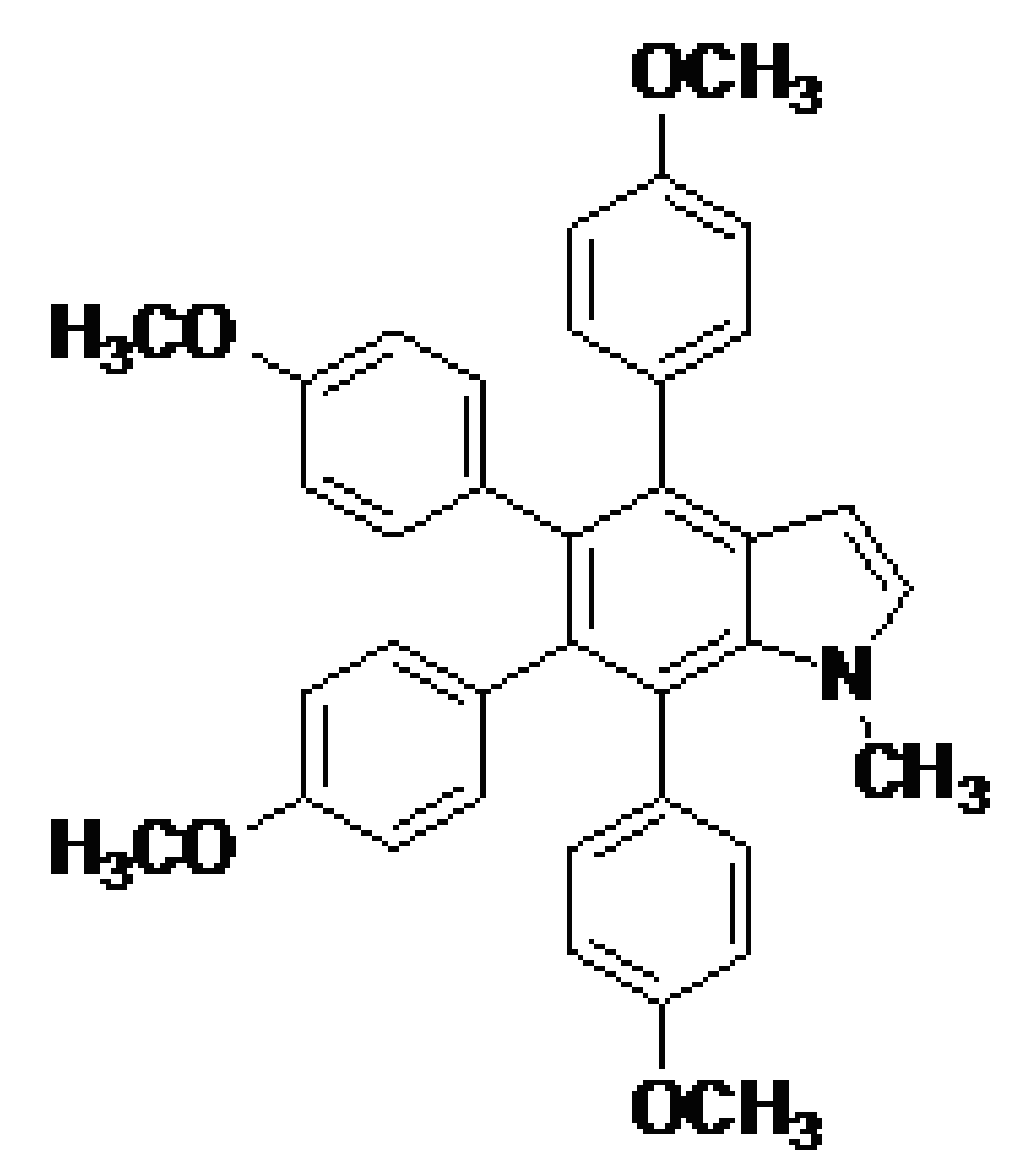

5ac

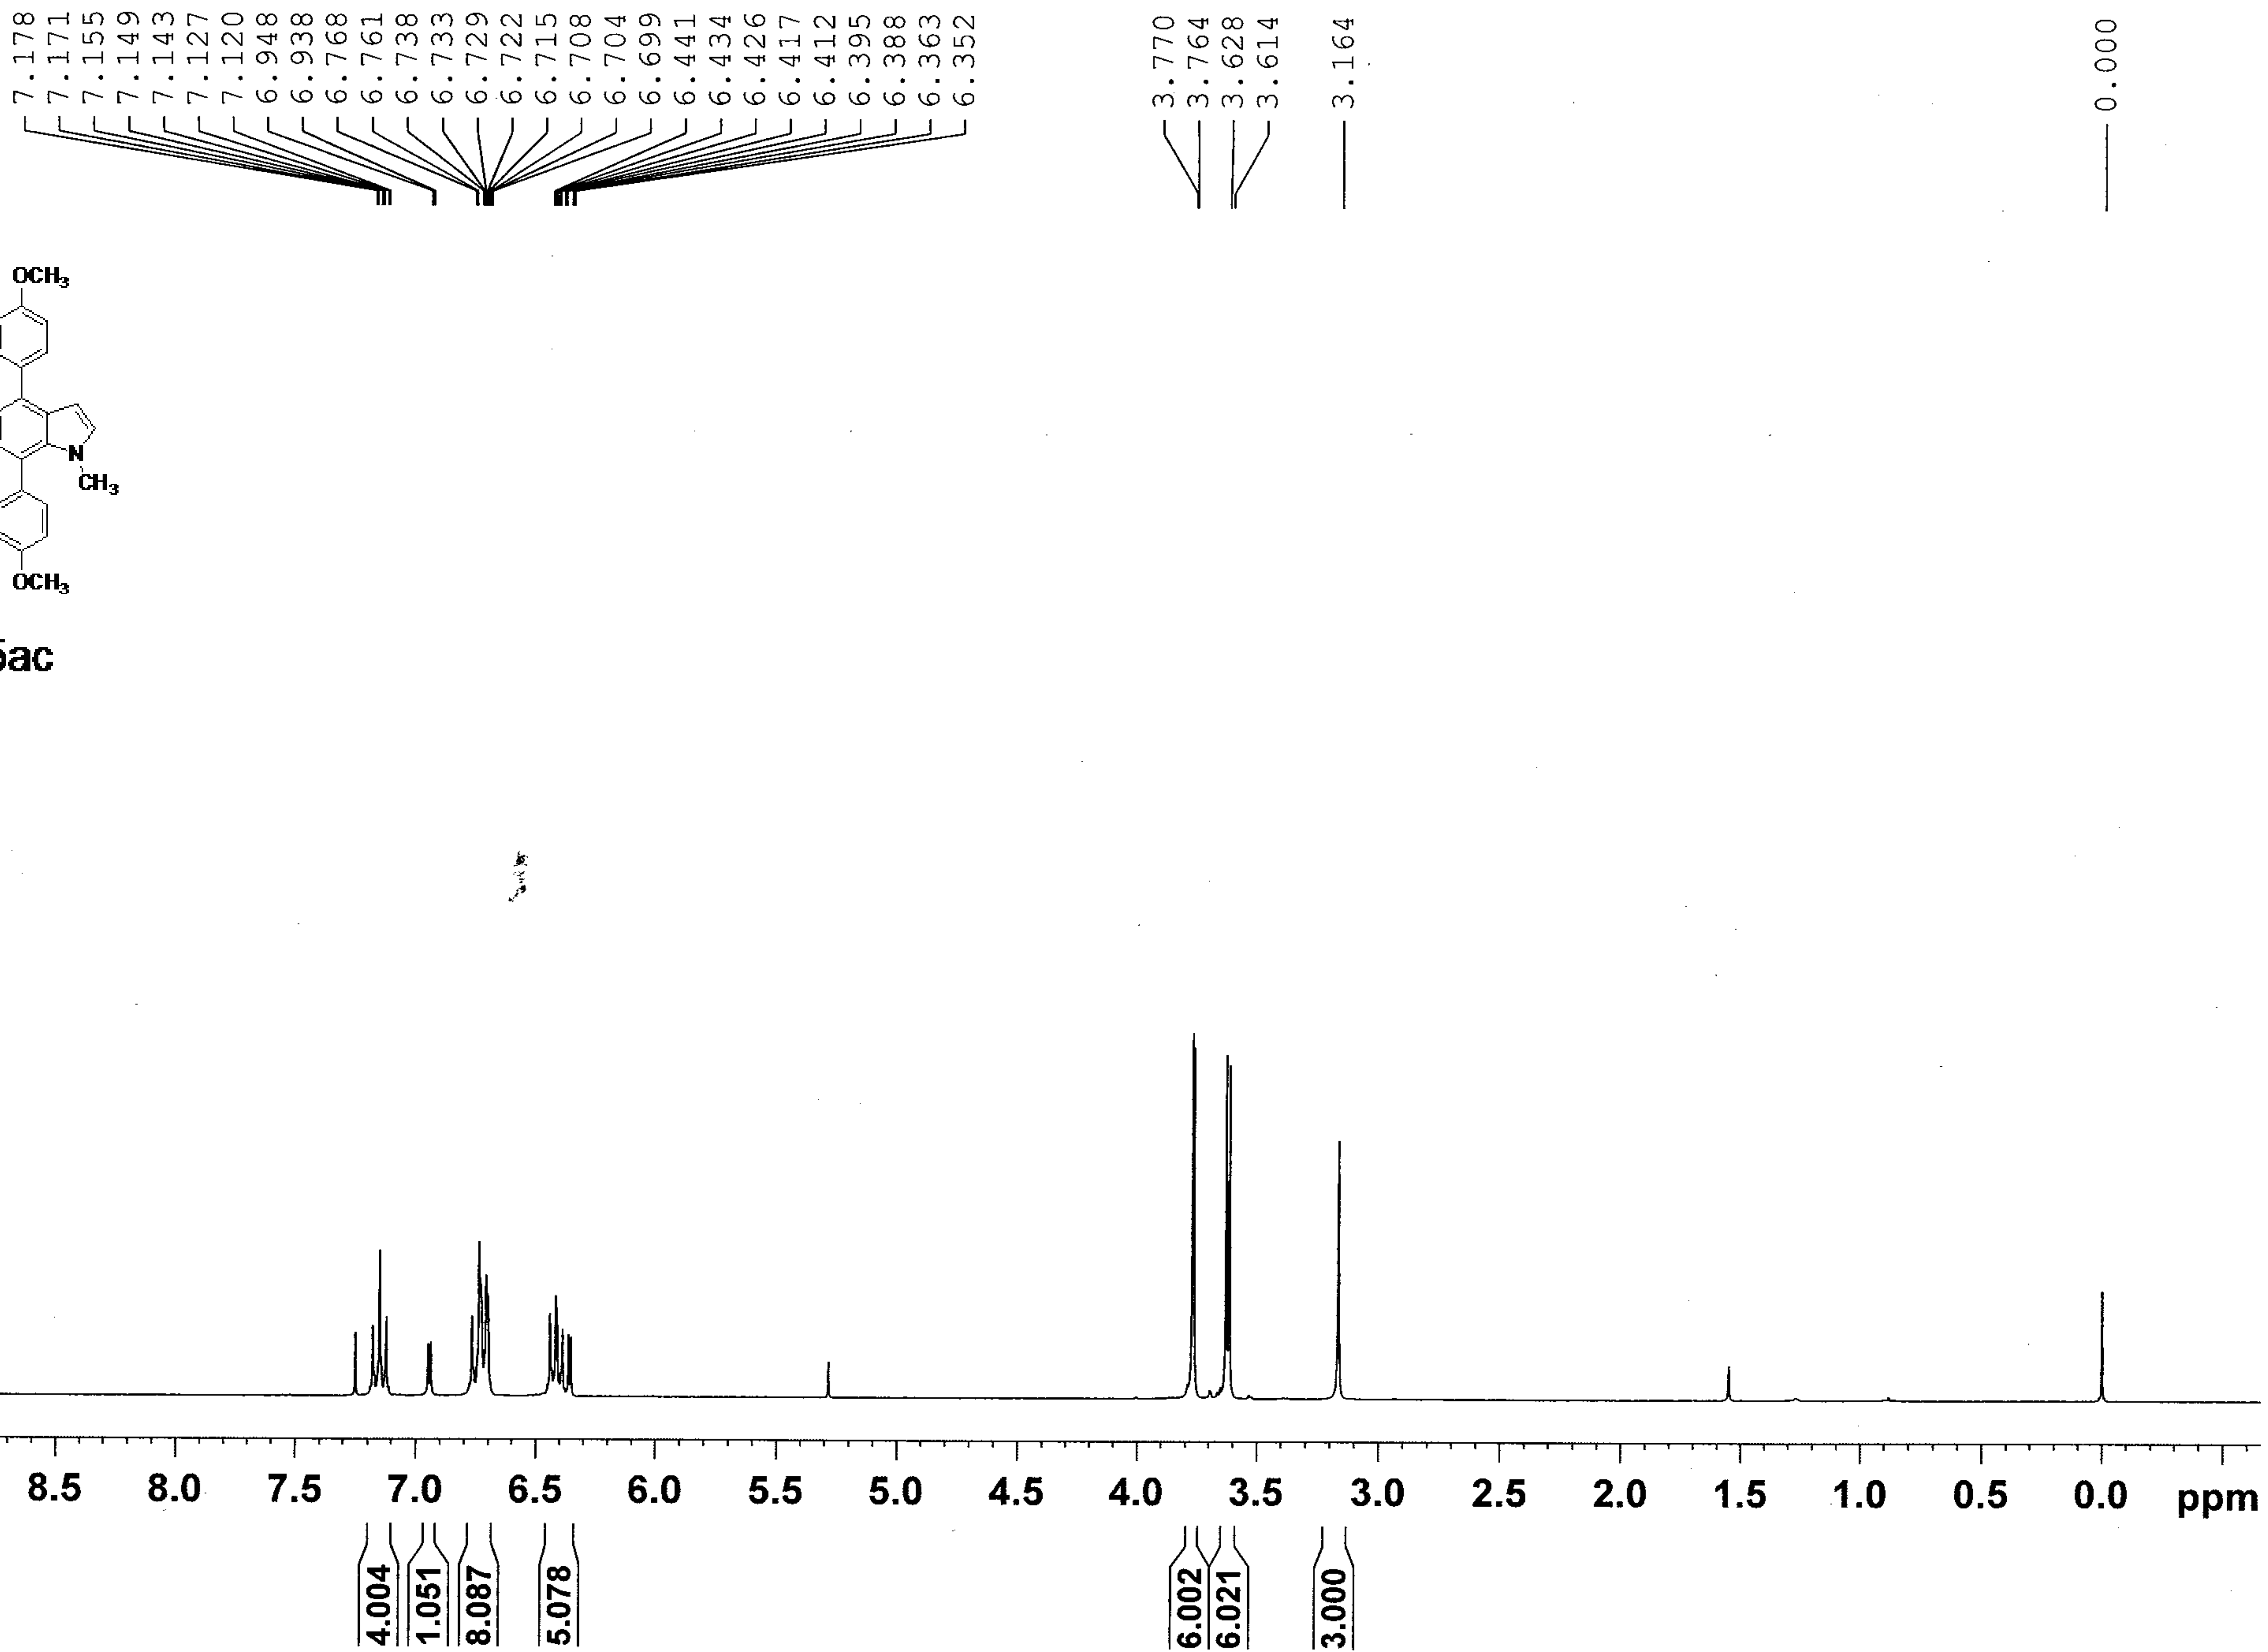

Handwritten notes:  $HN^+H_3O_2^+ - C_3H_7$

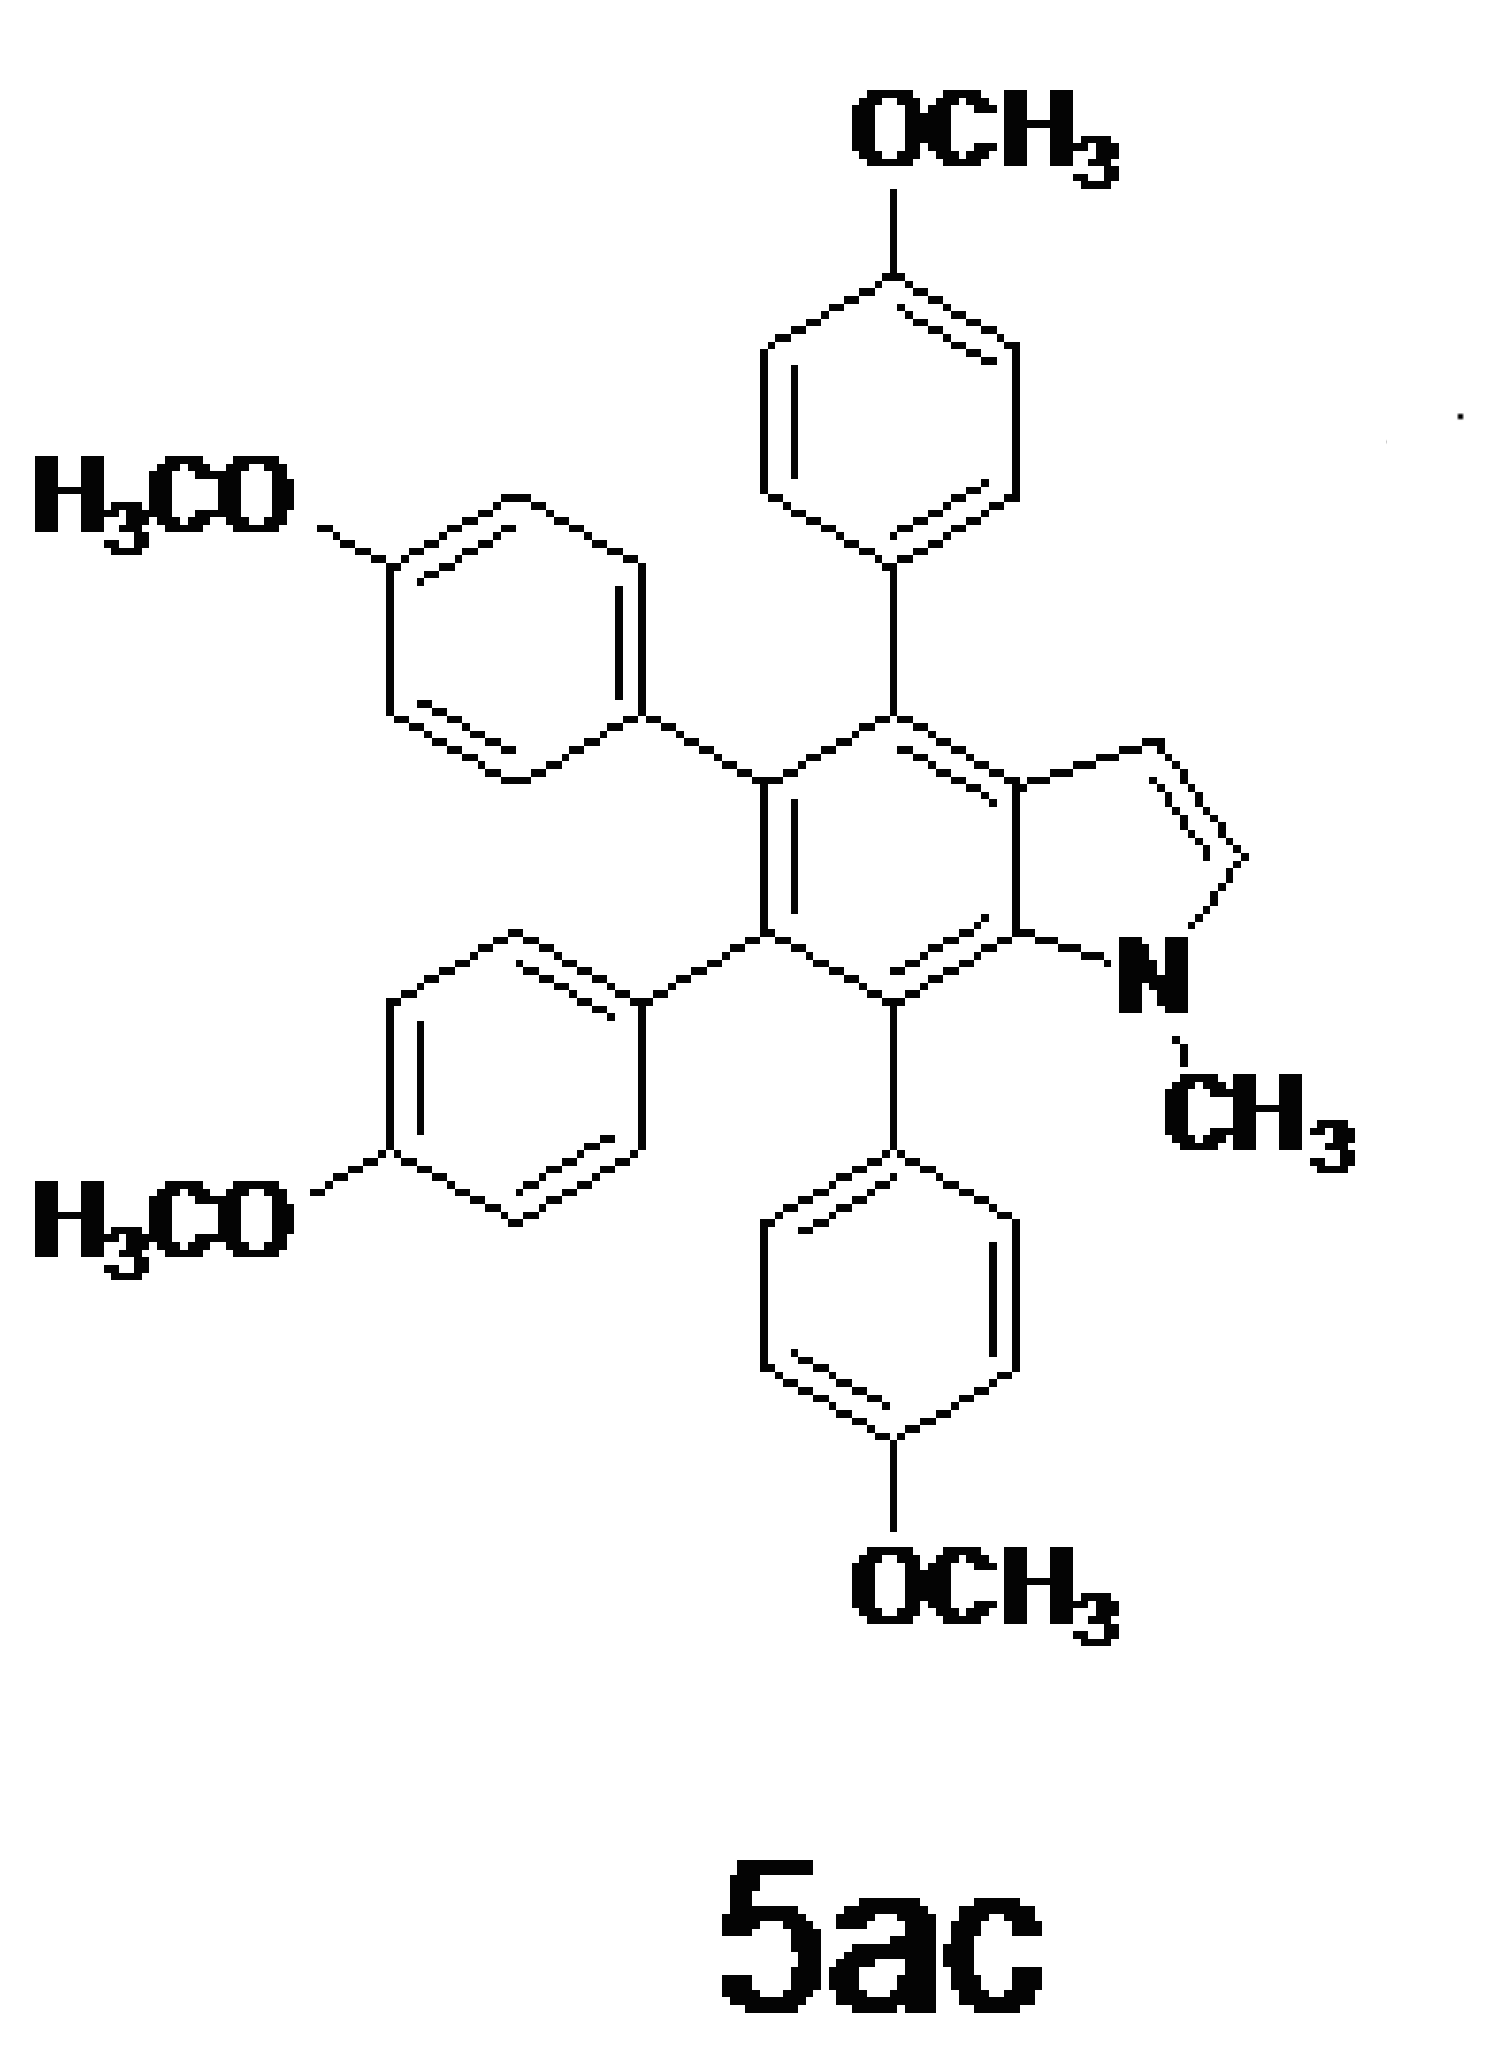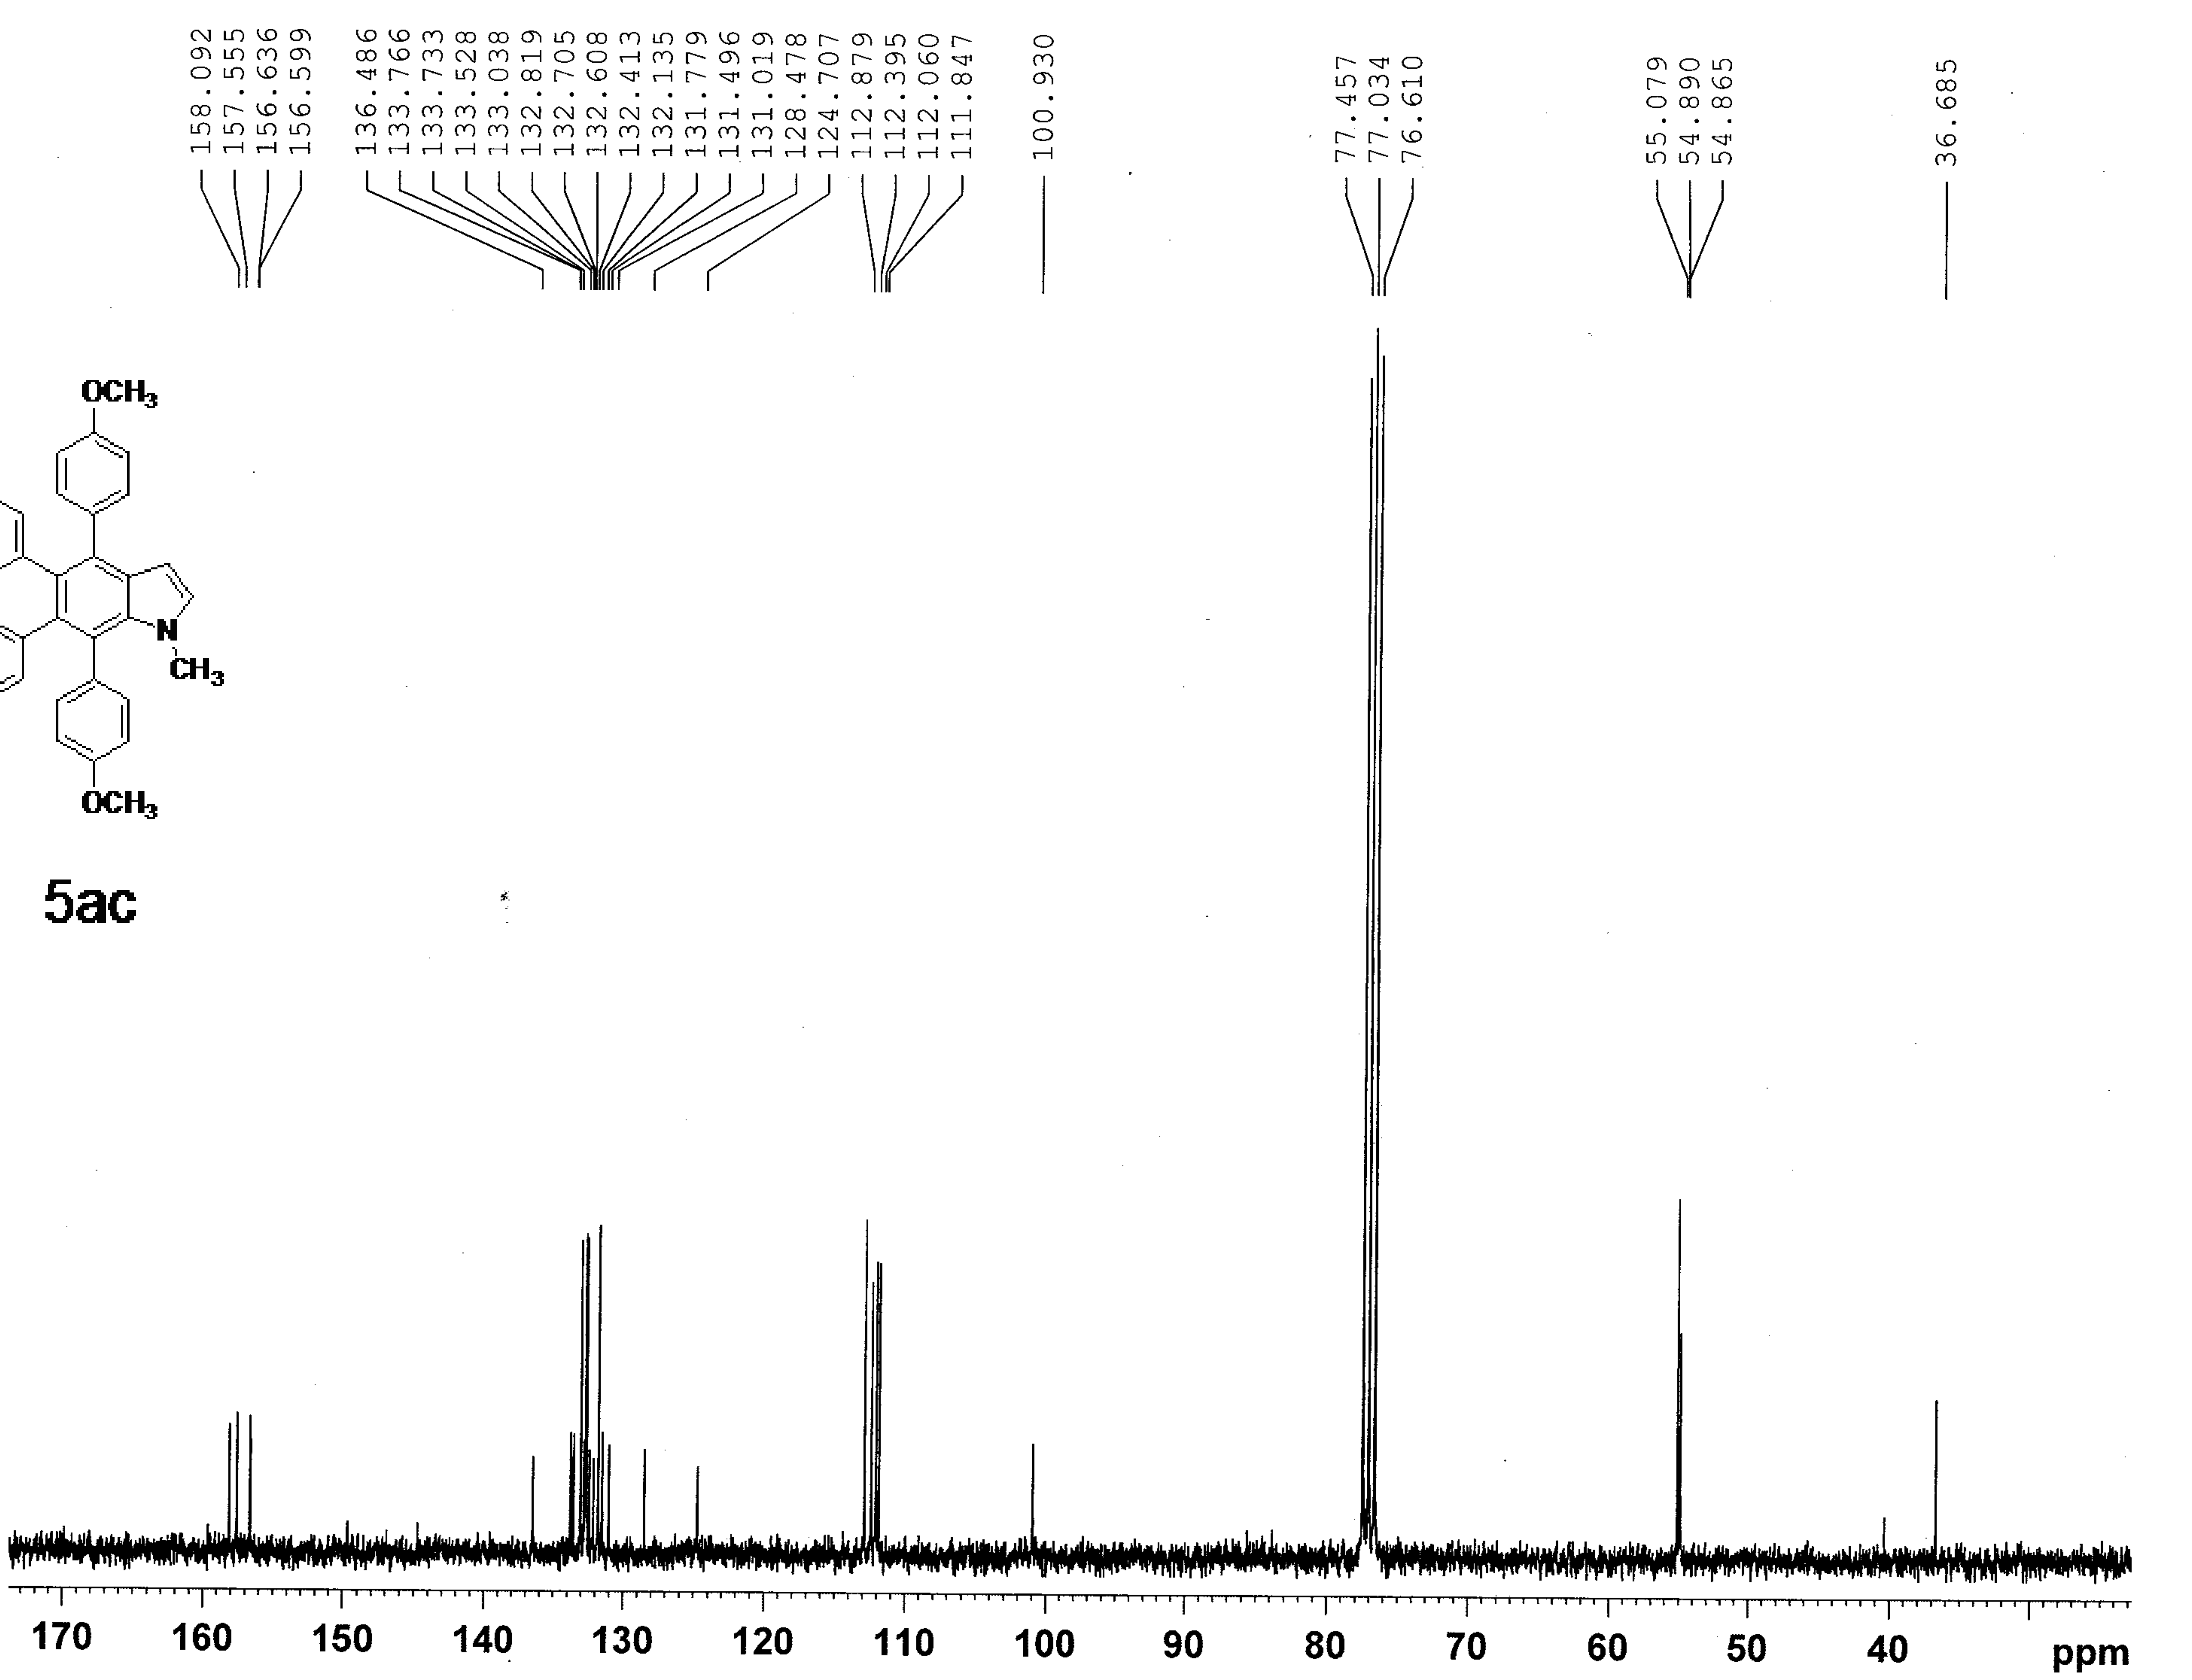

Molar absorption coefficient(L/mol·cm)

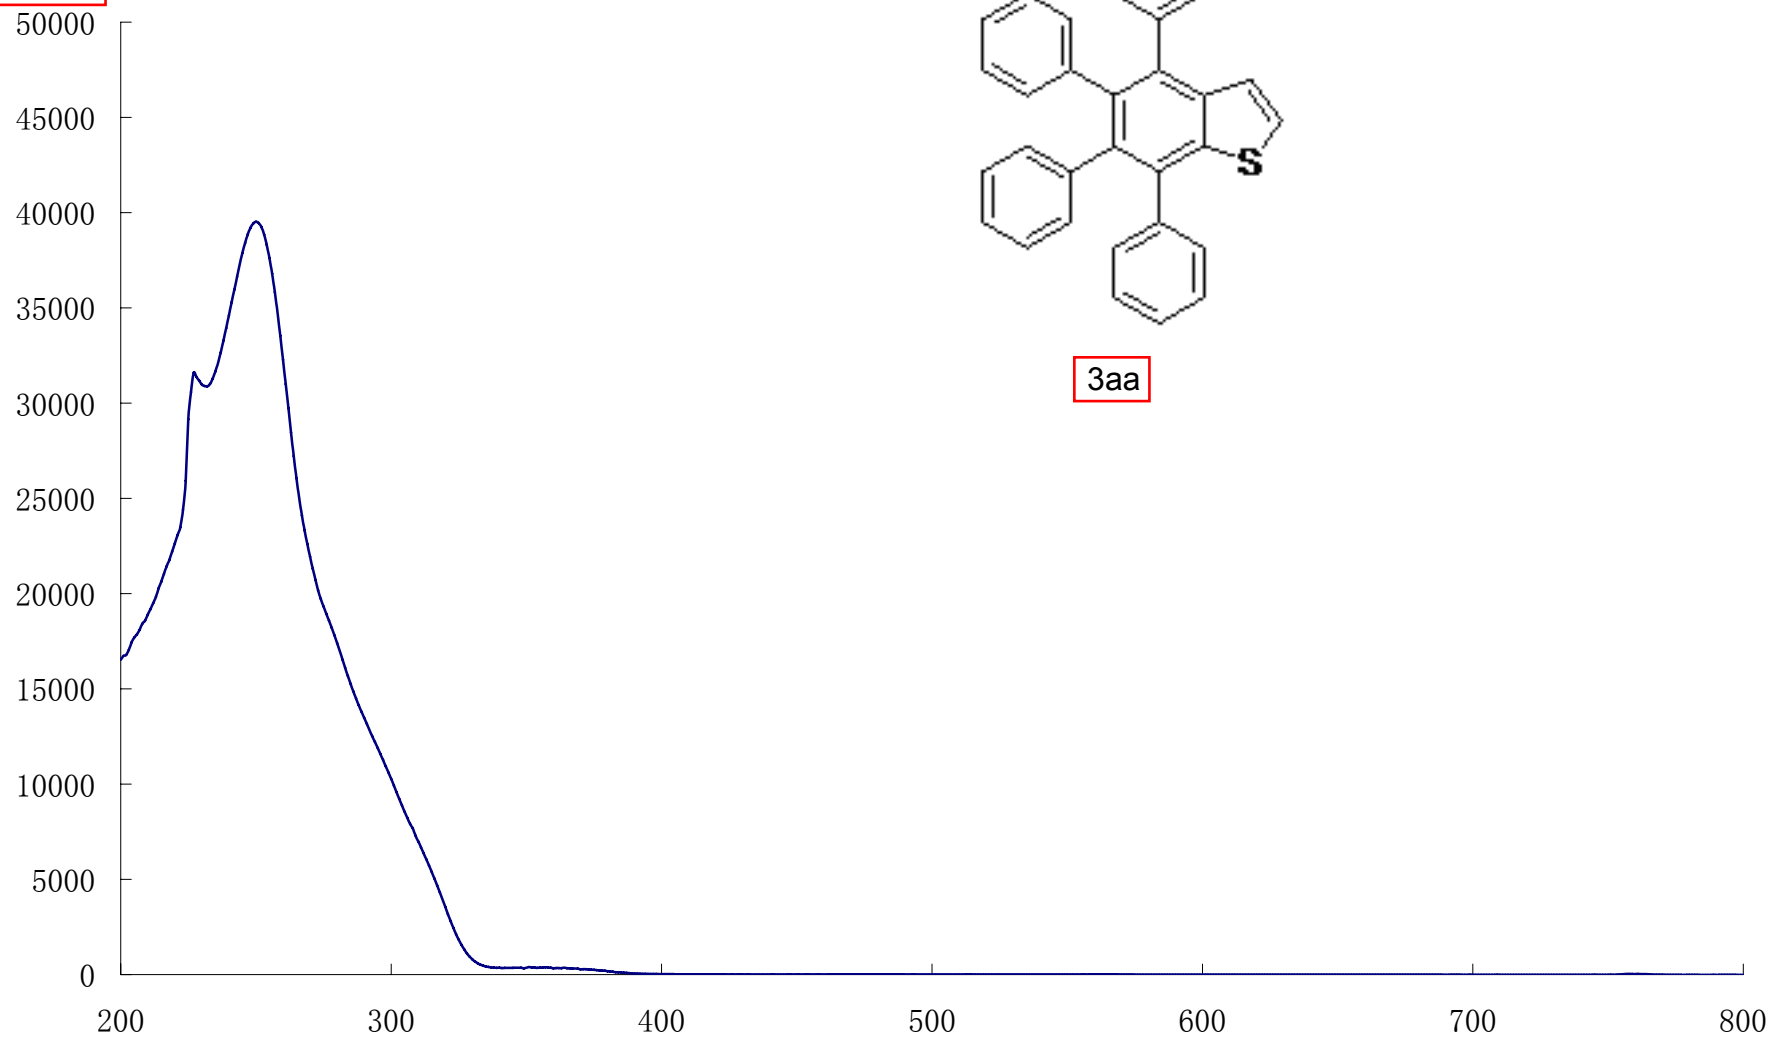

UV spectra of 3aa in DCM ([C]=5.0E-5 M).

Molar absorption  
coefficient(L/mol·  
cm)

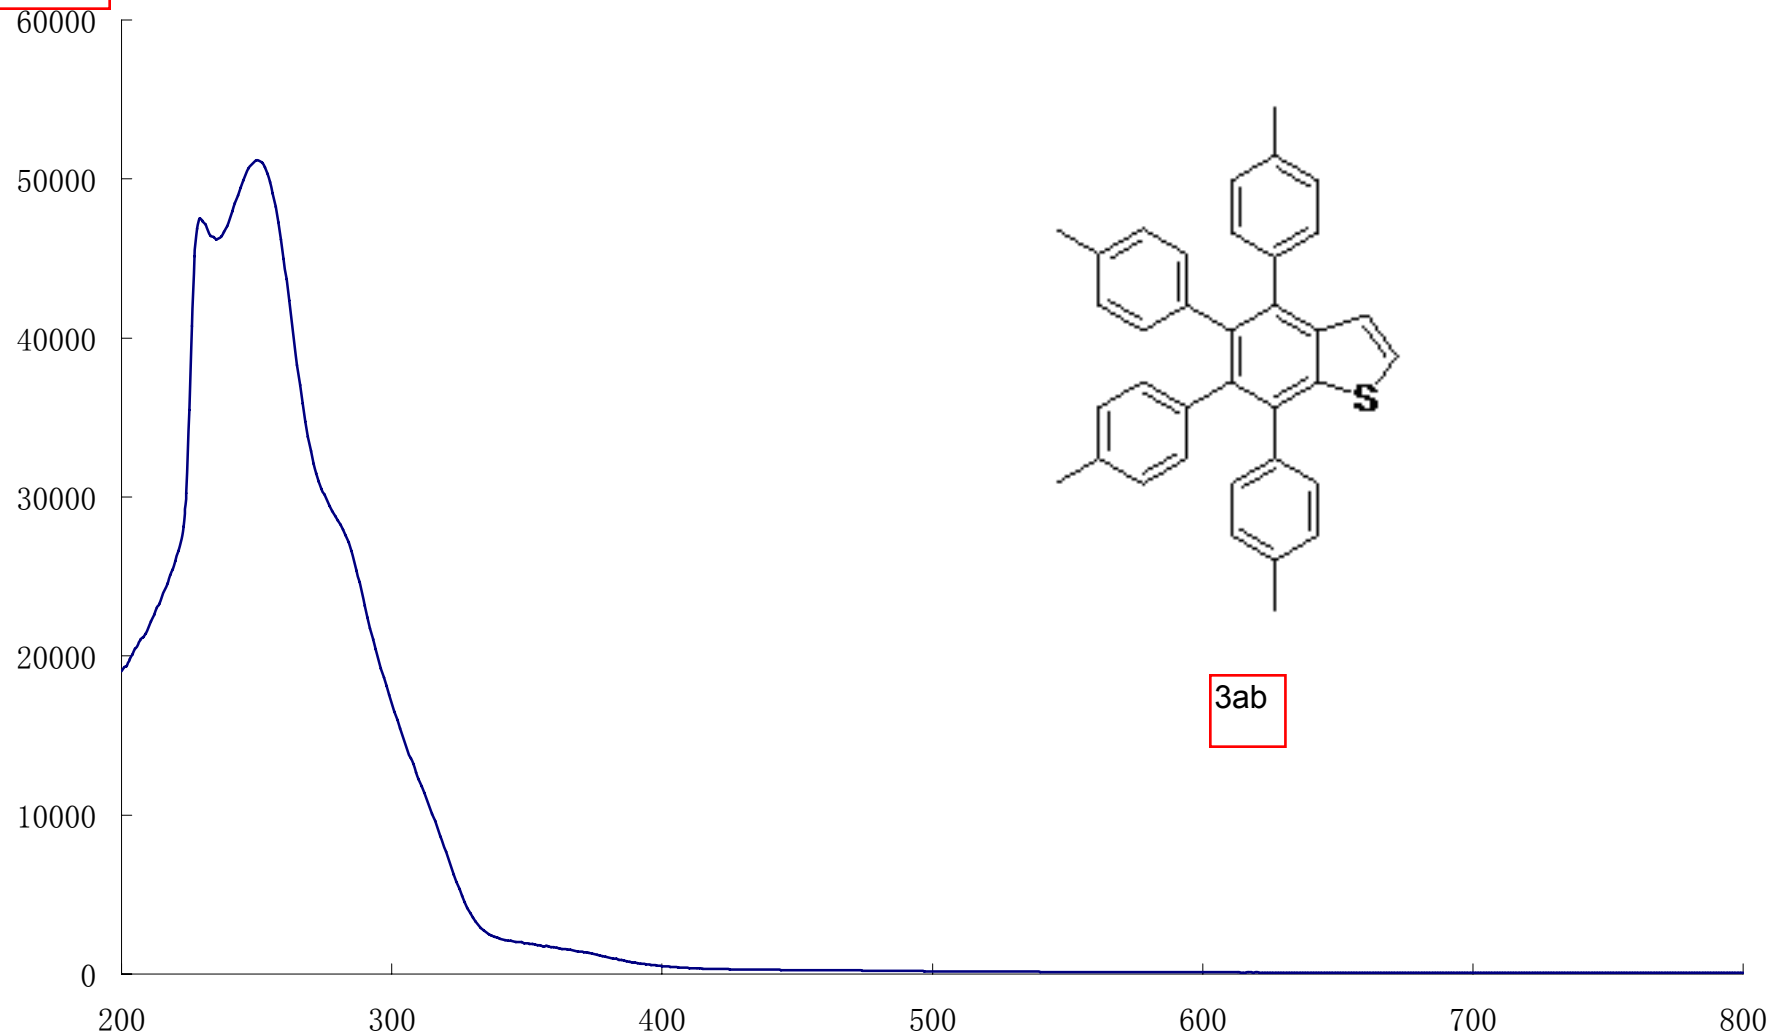

UV spectra of 3ab in DCM ([C]=5.0E-5 M).

Wavelength(nm)



Molar absorption  
coefficient(L/mol·  
cm)

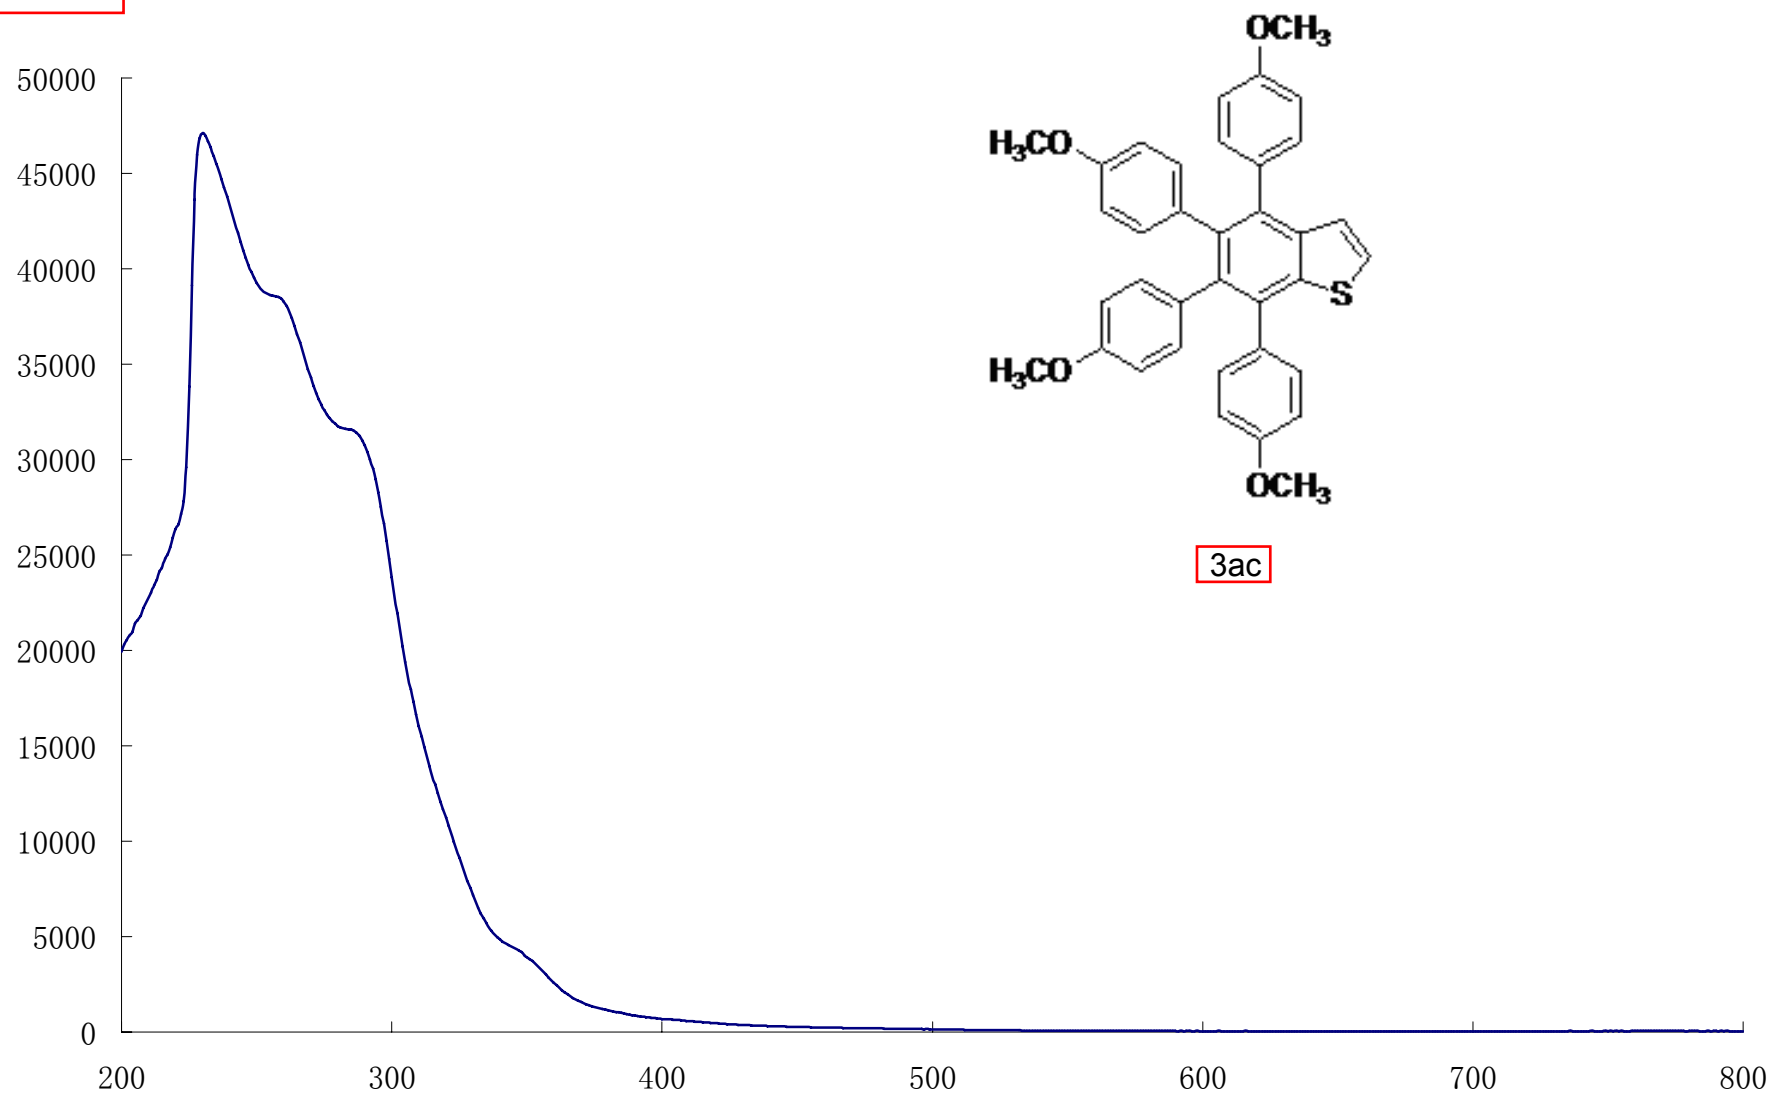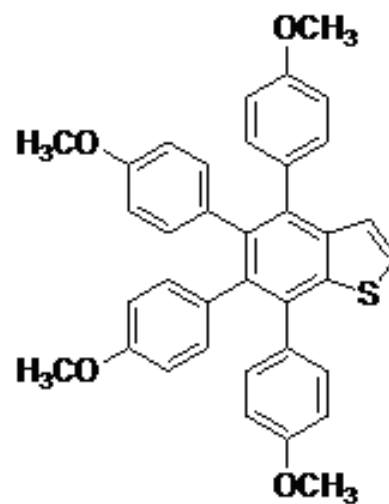

3ac

Molar absorption  
coefficient(L/mol·  
cm)

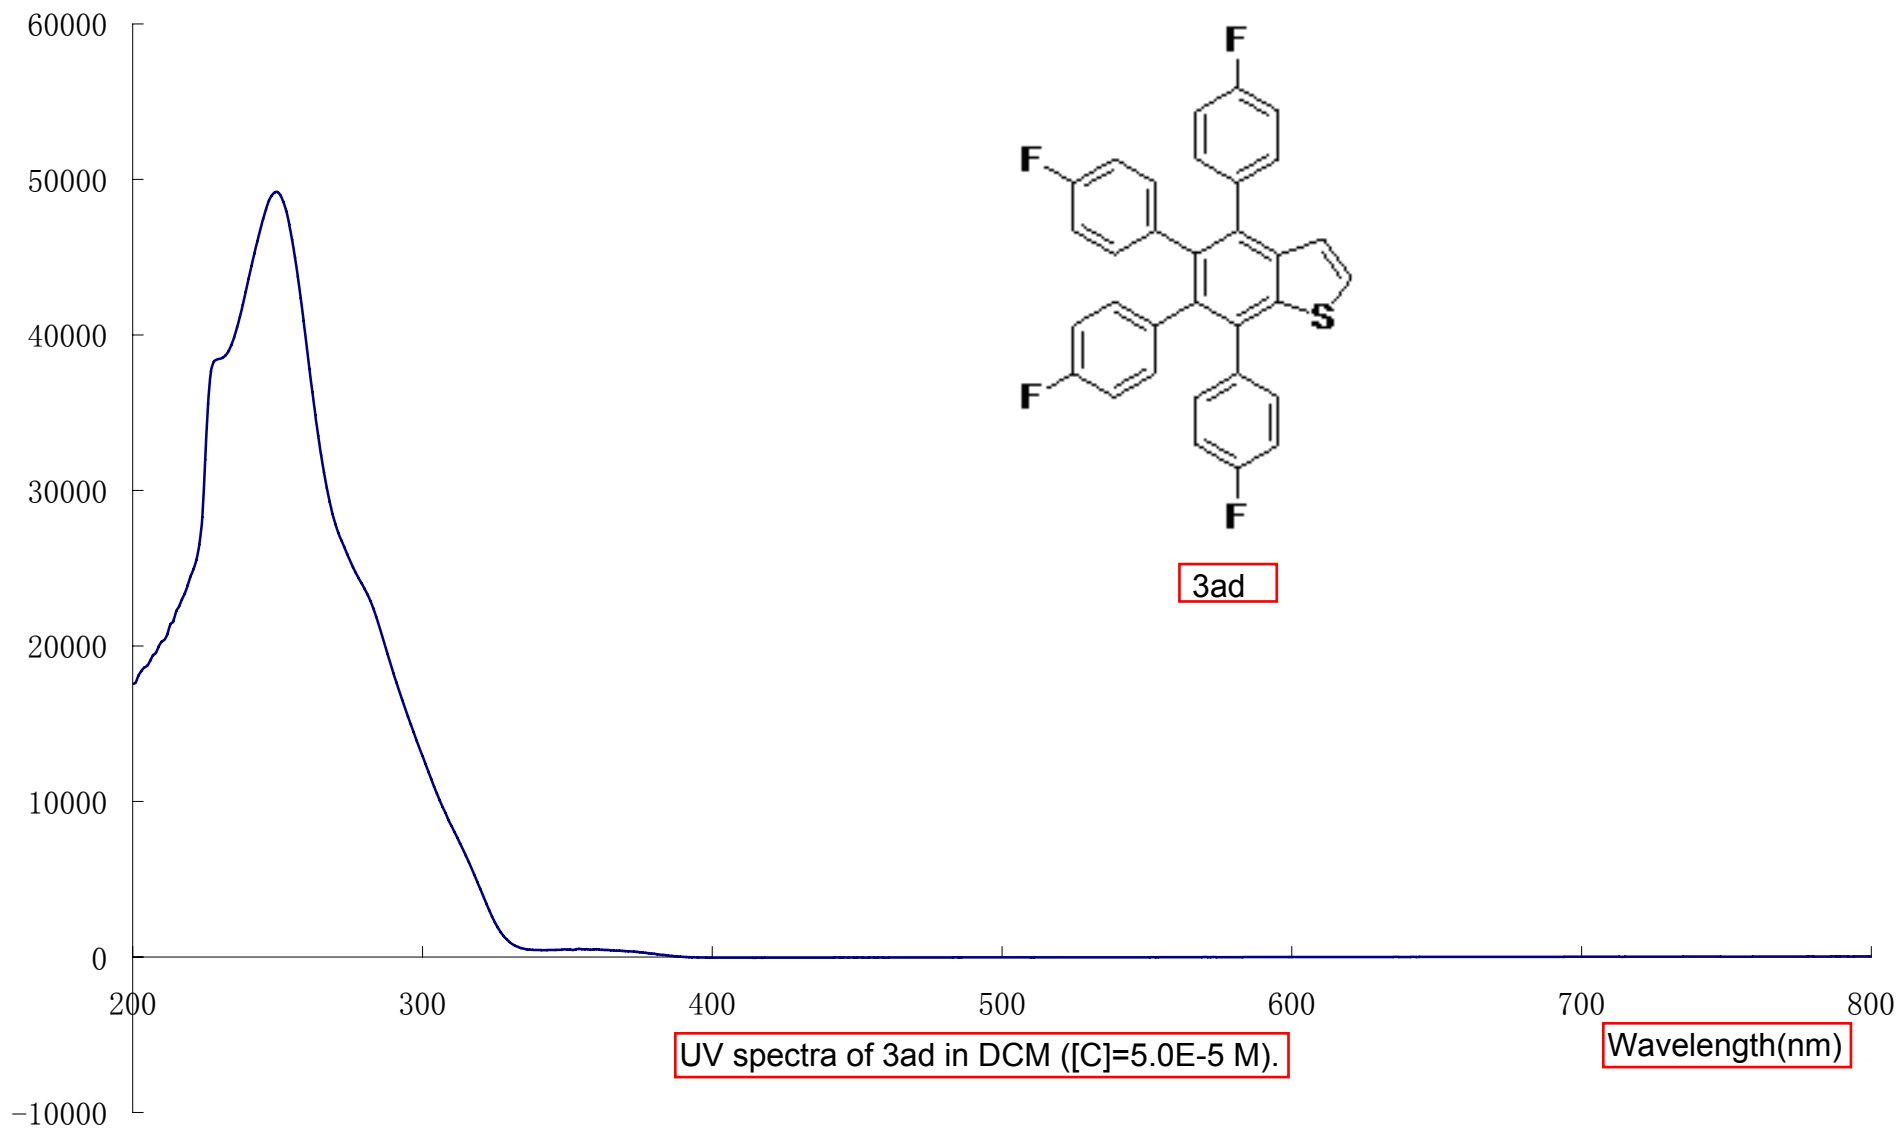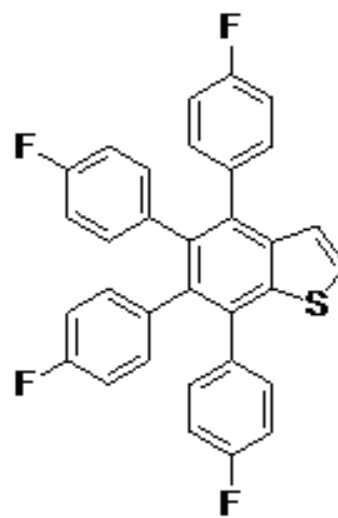

3ad

Molar absorption  
coefficient(L/mol·  
cm)

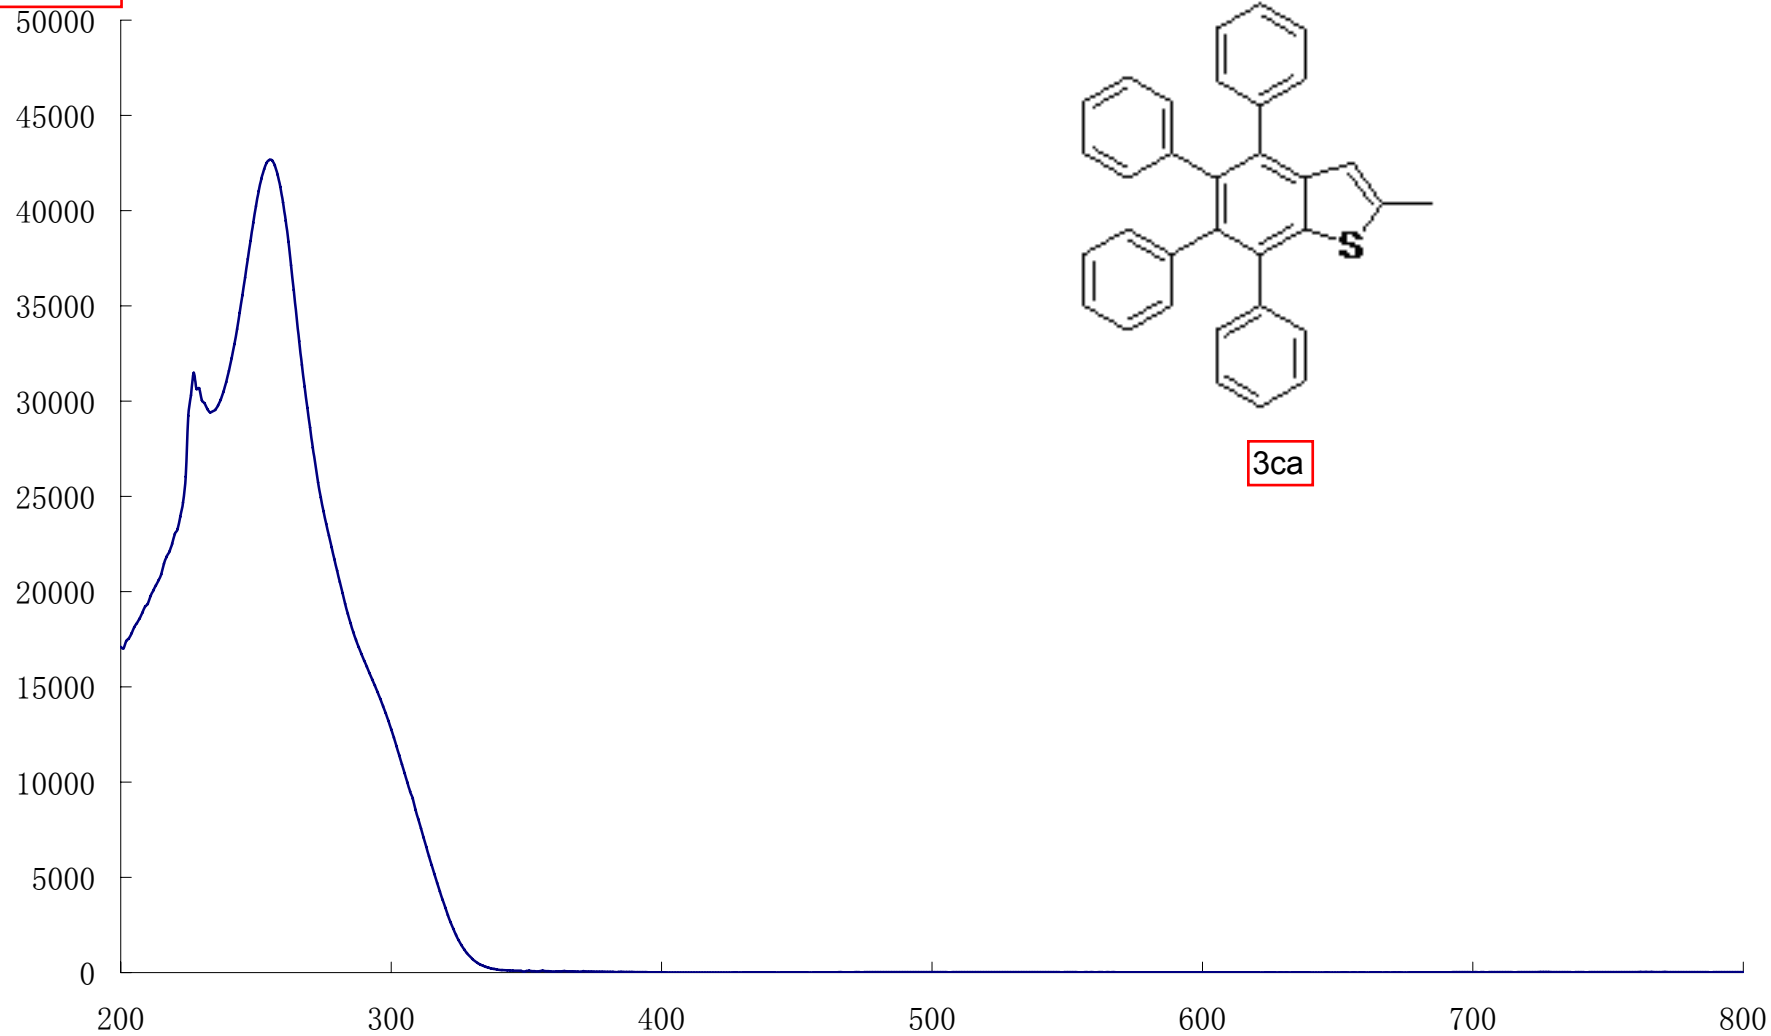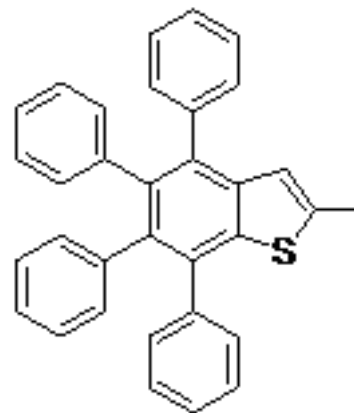

3ca

UV spectra of 3ca in DCM ([C]=5.0E-5 M)

Wavelength(nm)

Molar absorption coefficient(L/mol•cm)

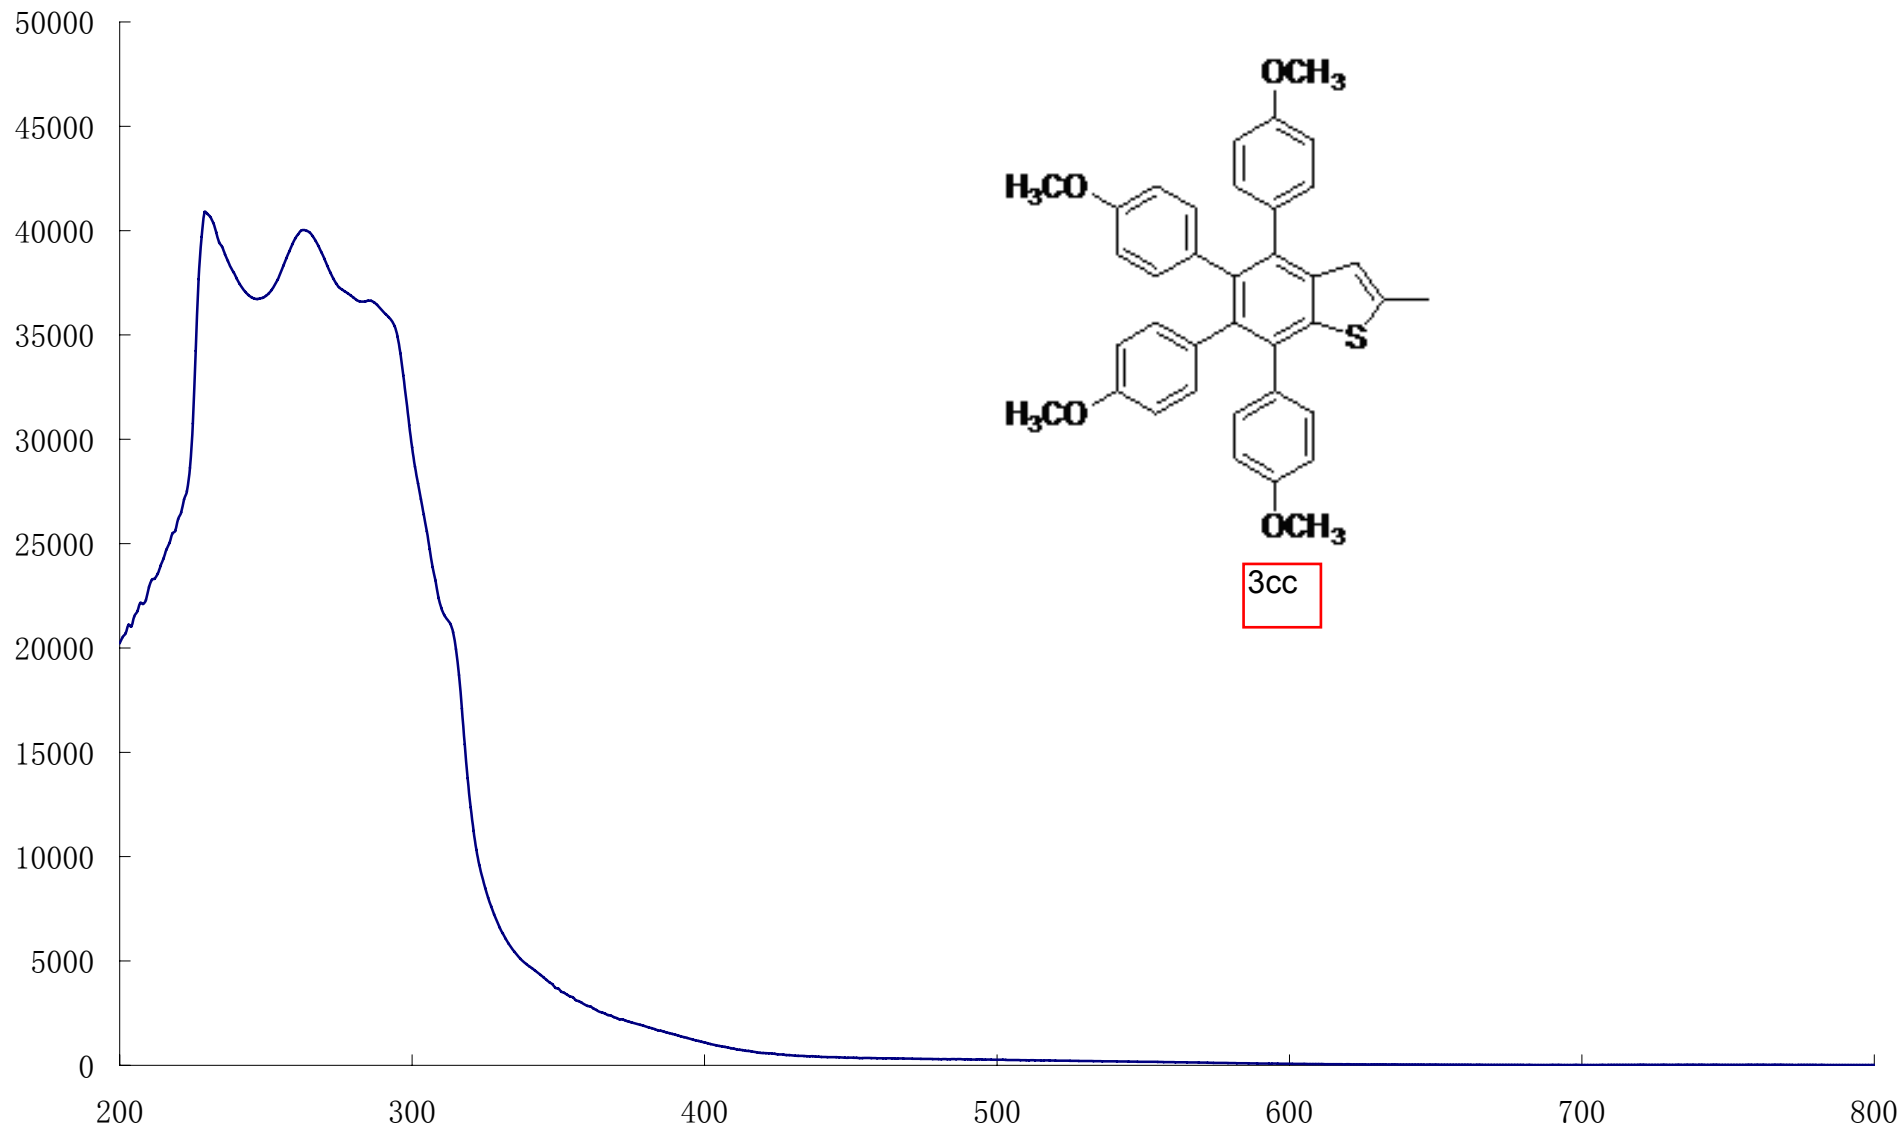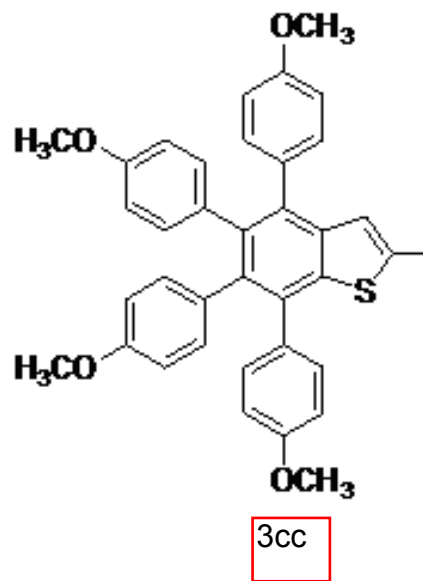

Molar absorption  
coefficient(L/mol·  
cm)

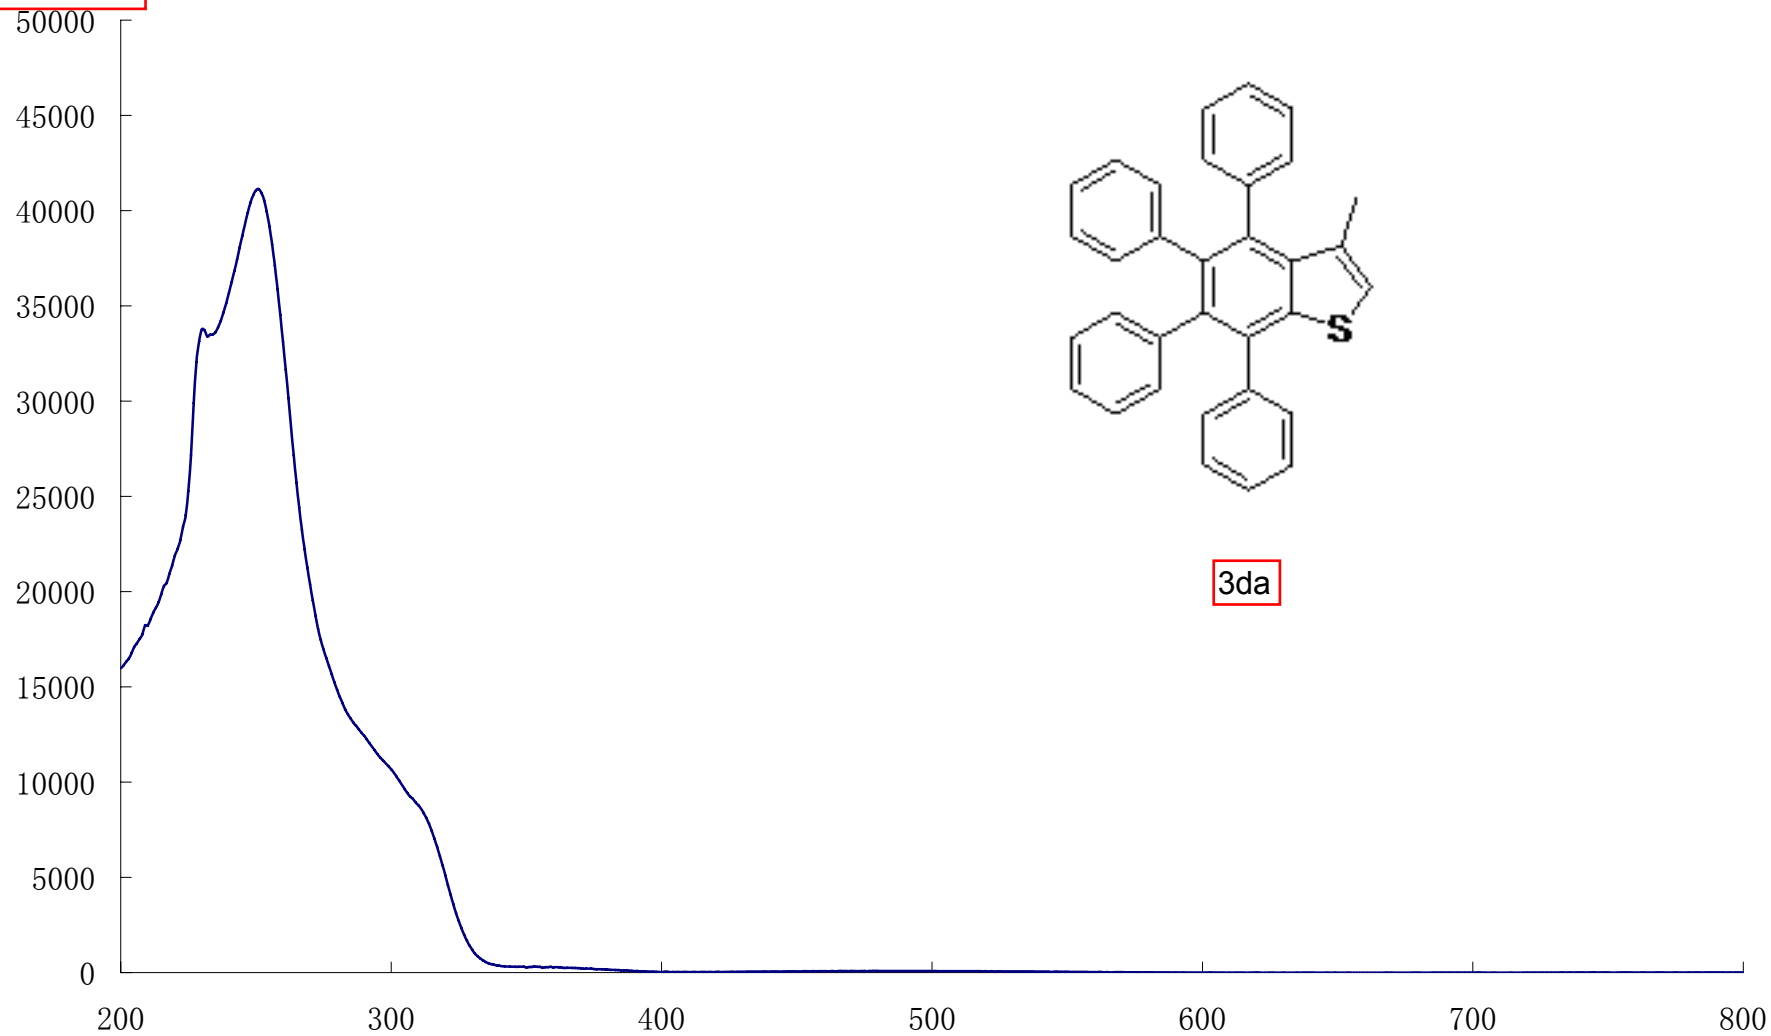

UV spectra of 3da in DCM ([C]=5.0E-5 M).

Wavelength(nm)

3da

Molar absorption  
coefficient(L/mol·  
cm)

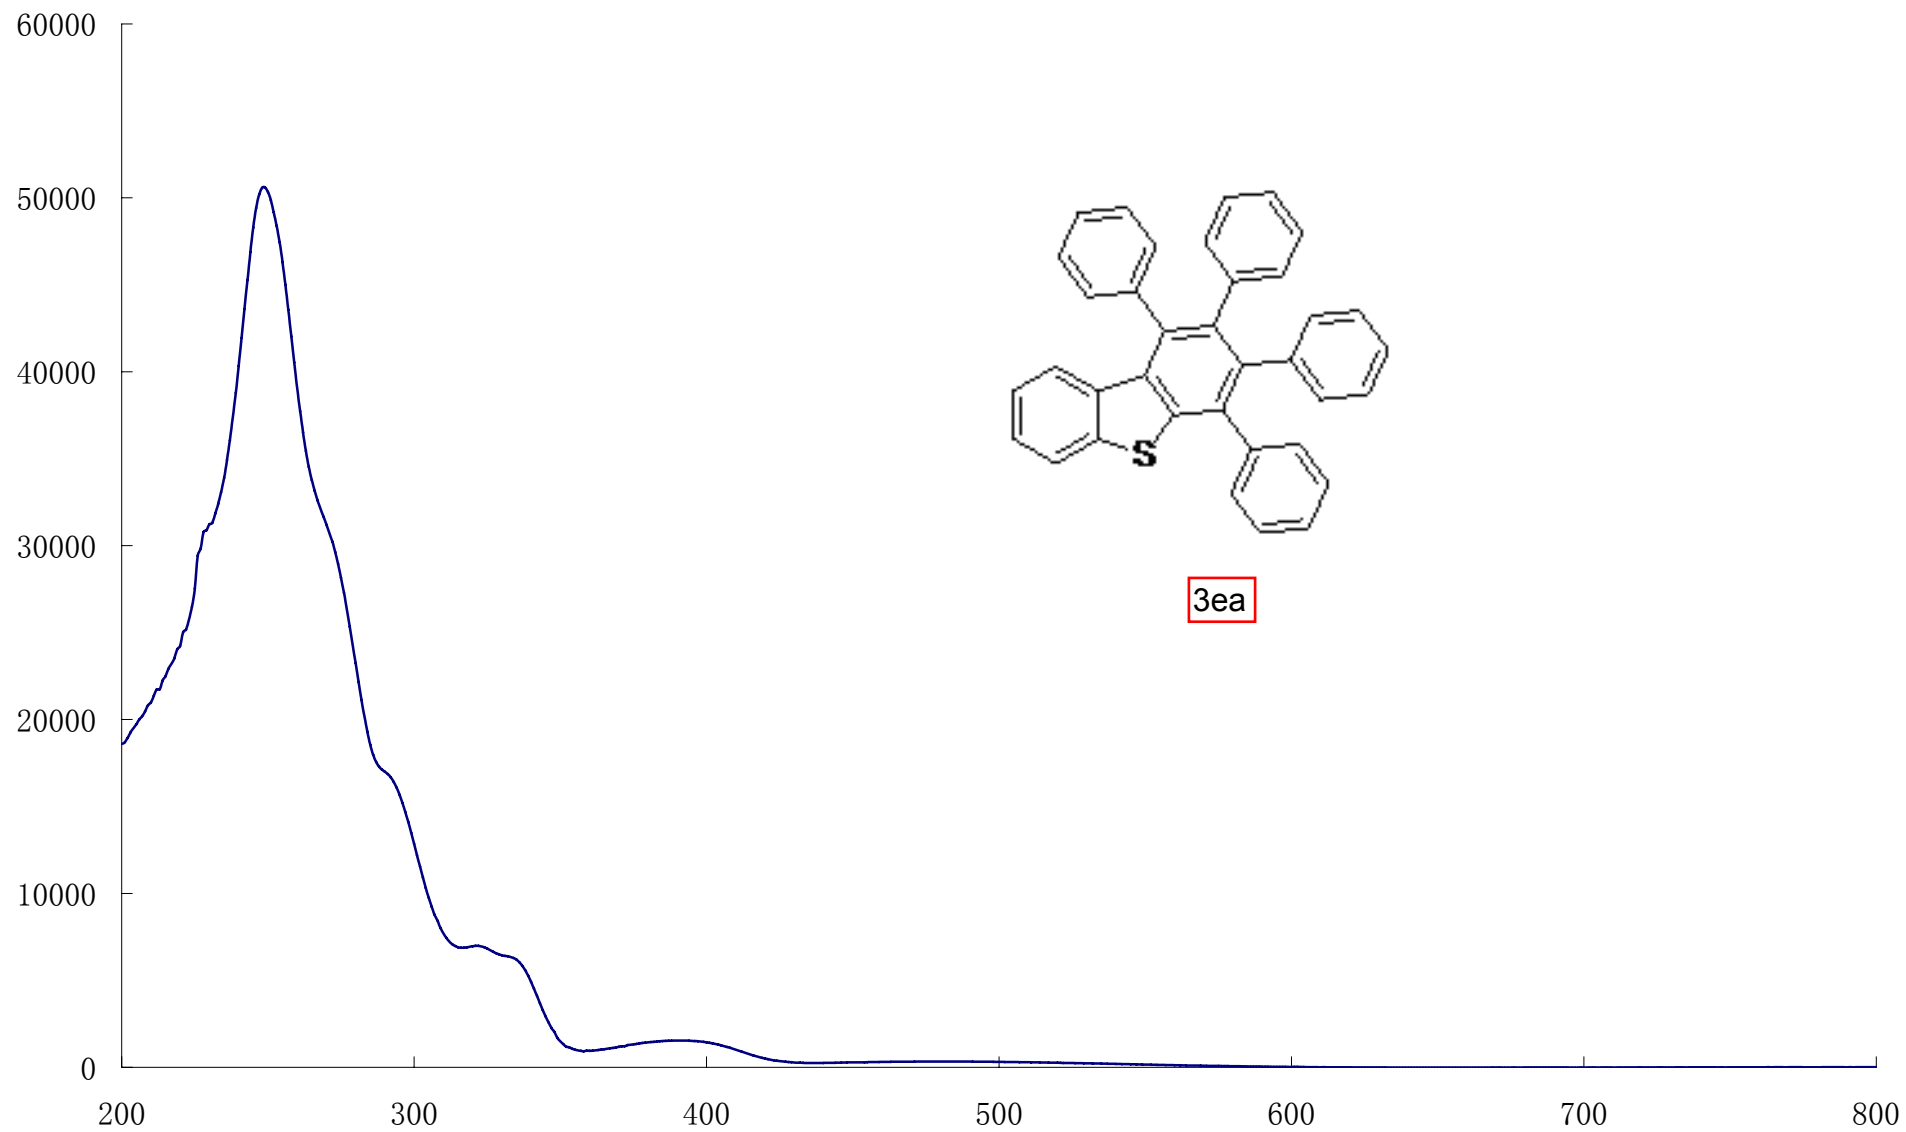

UV spectra of 3ea in DCM ([C]=5.0E-5 M).

Molar absorption  
coefficient(L/mol·  
cm)

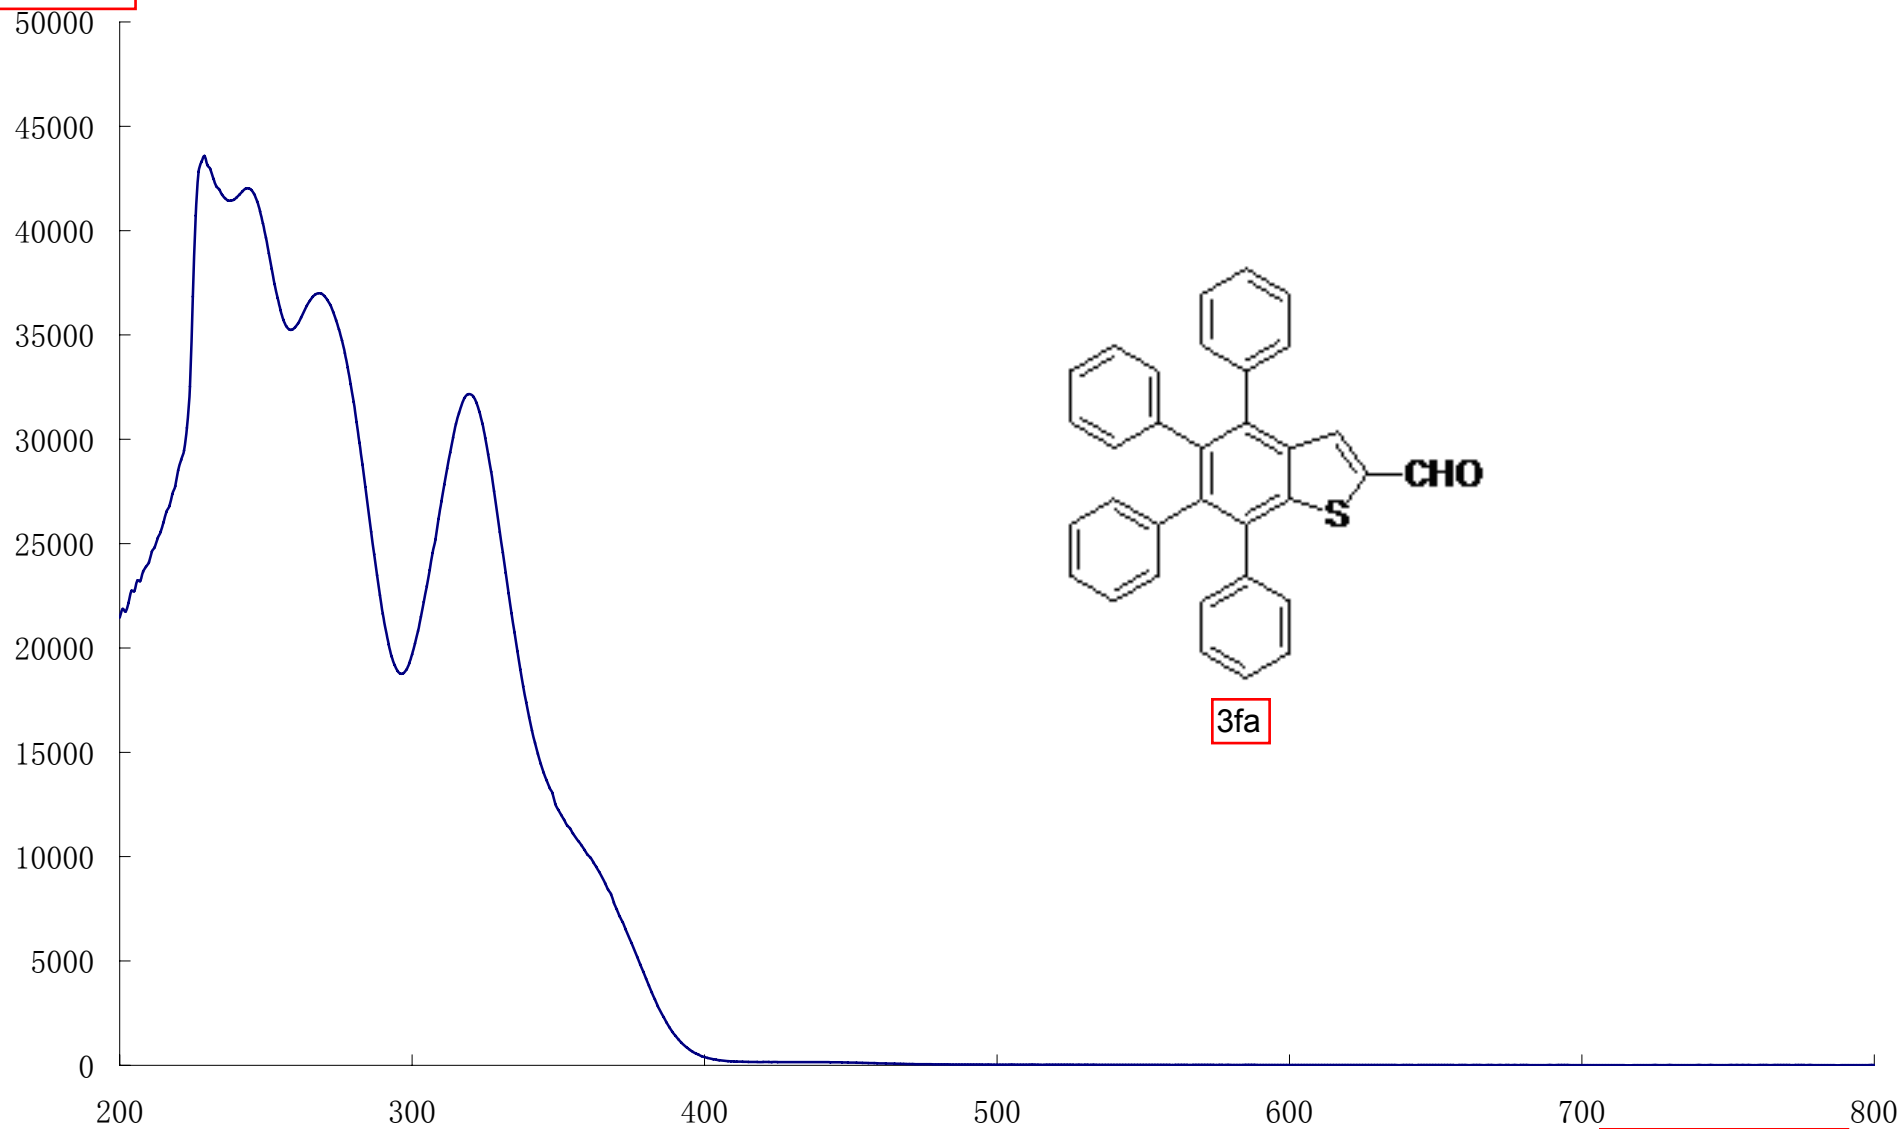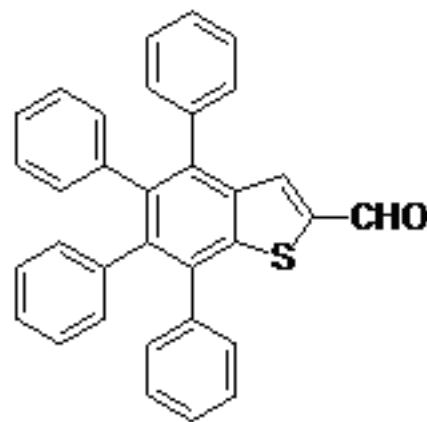

3fa

UV spectra of 3fa in DCM ([C]=5.0E-5 M).

Wavelength(nm)

Molar absorption  
coefficient(L/mol·  
cm)

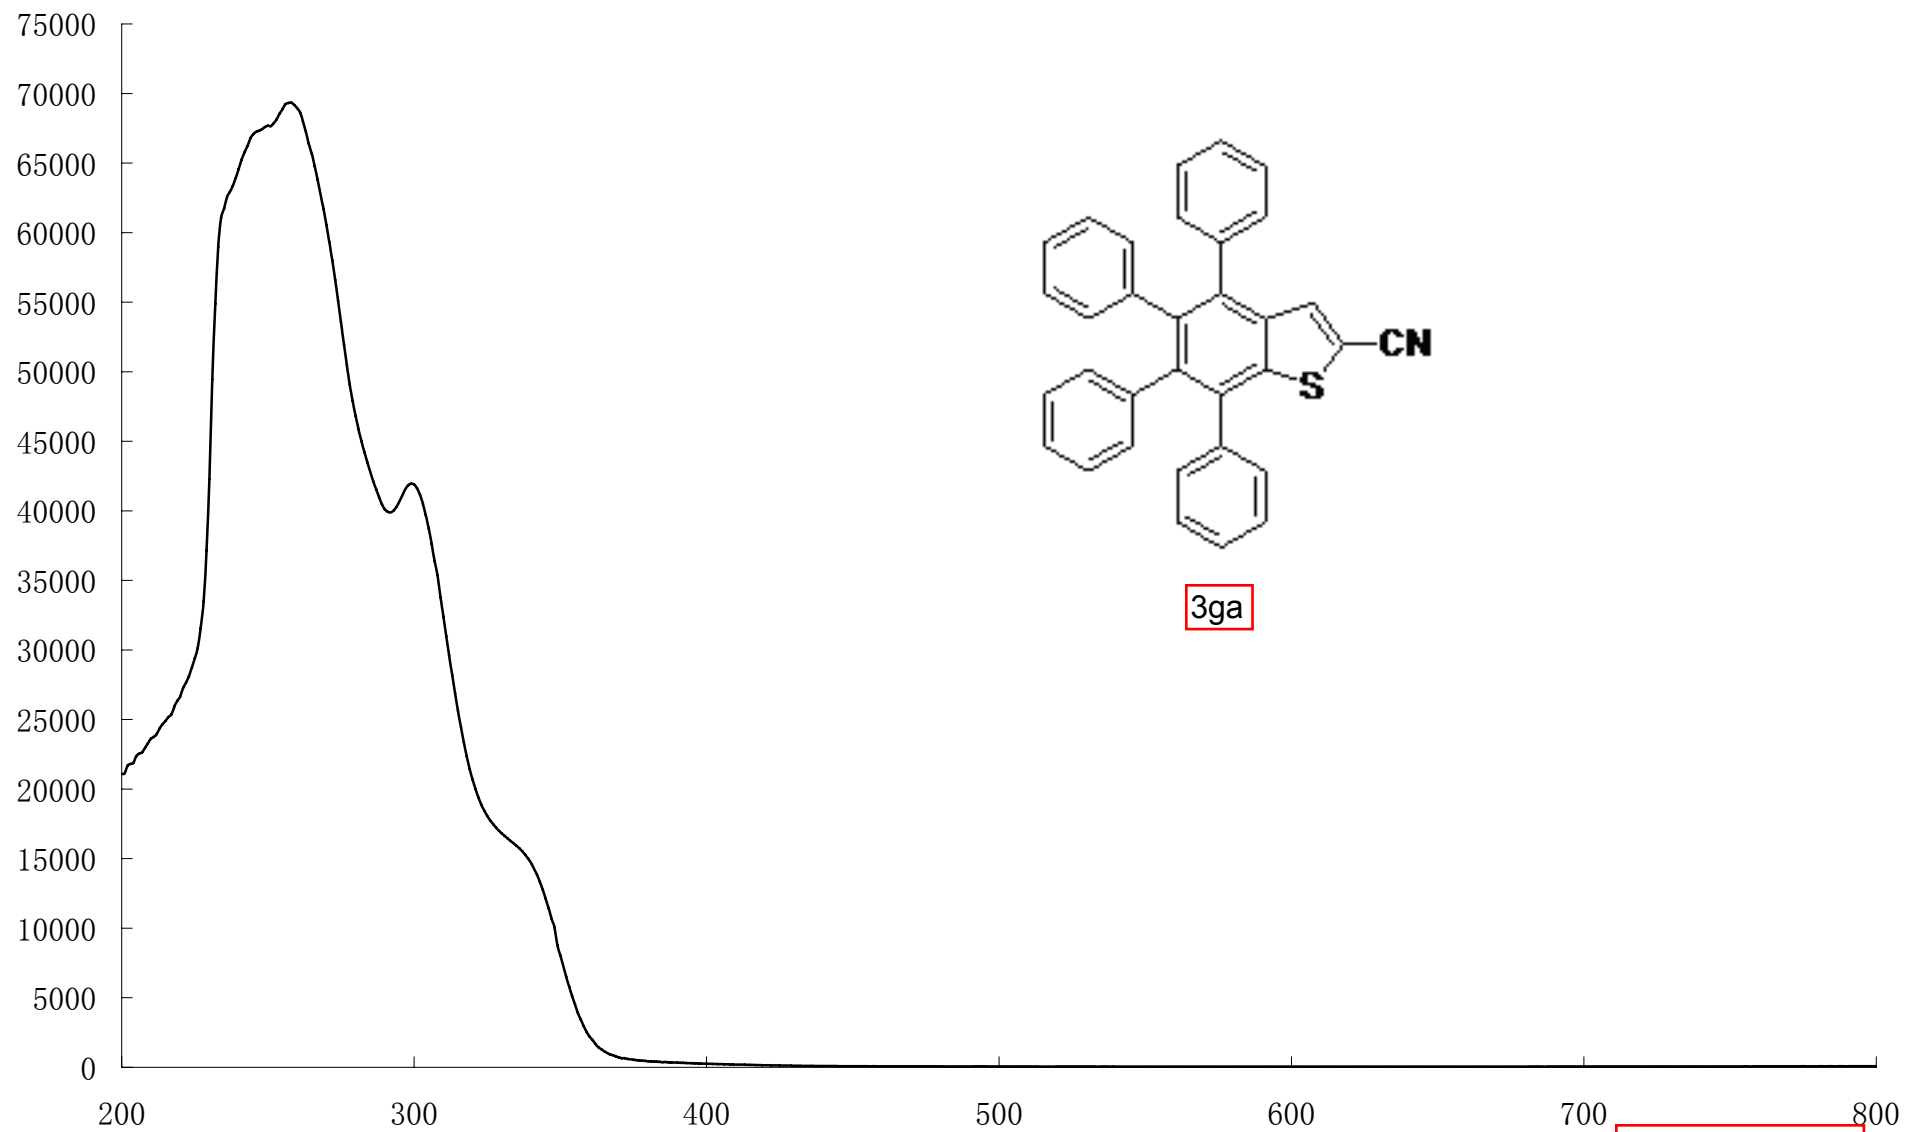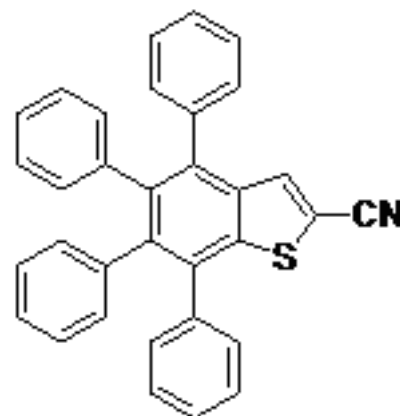

3ga



Molar absorption  
coefficient(L/mol·  
cm)

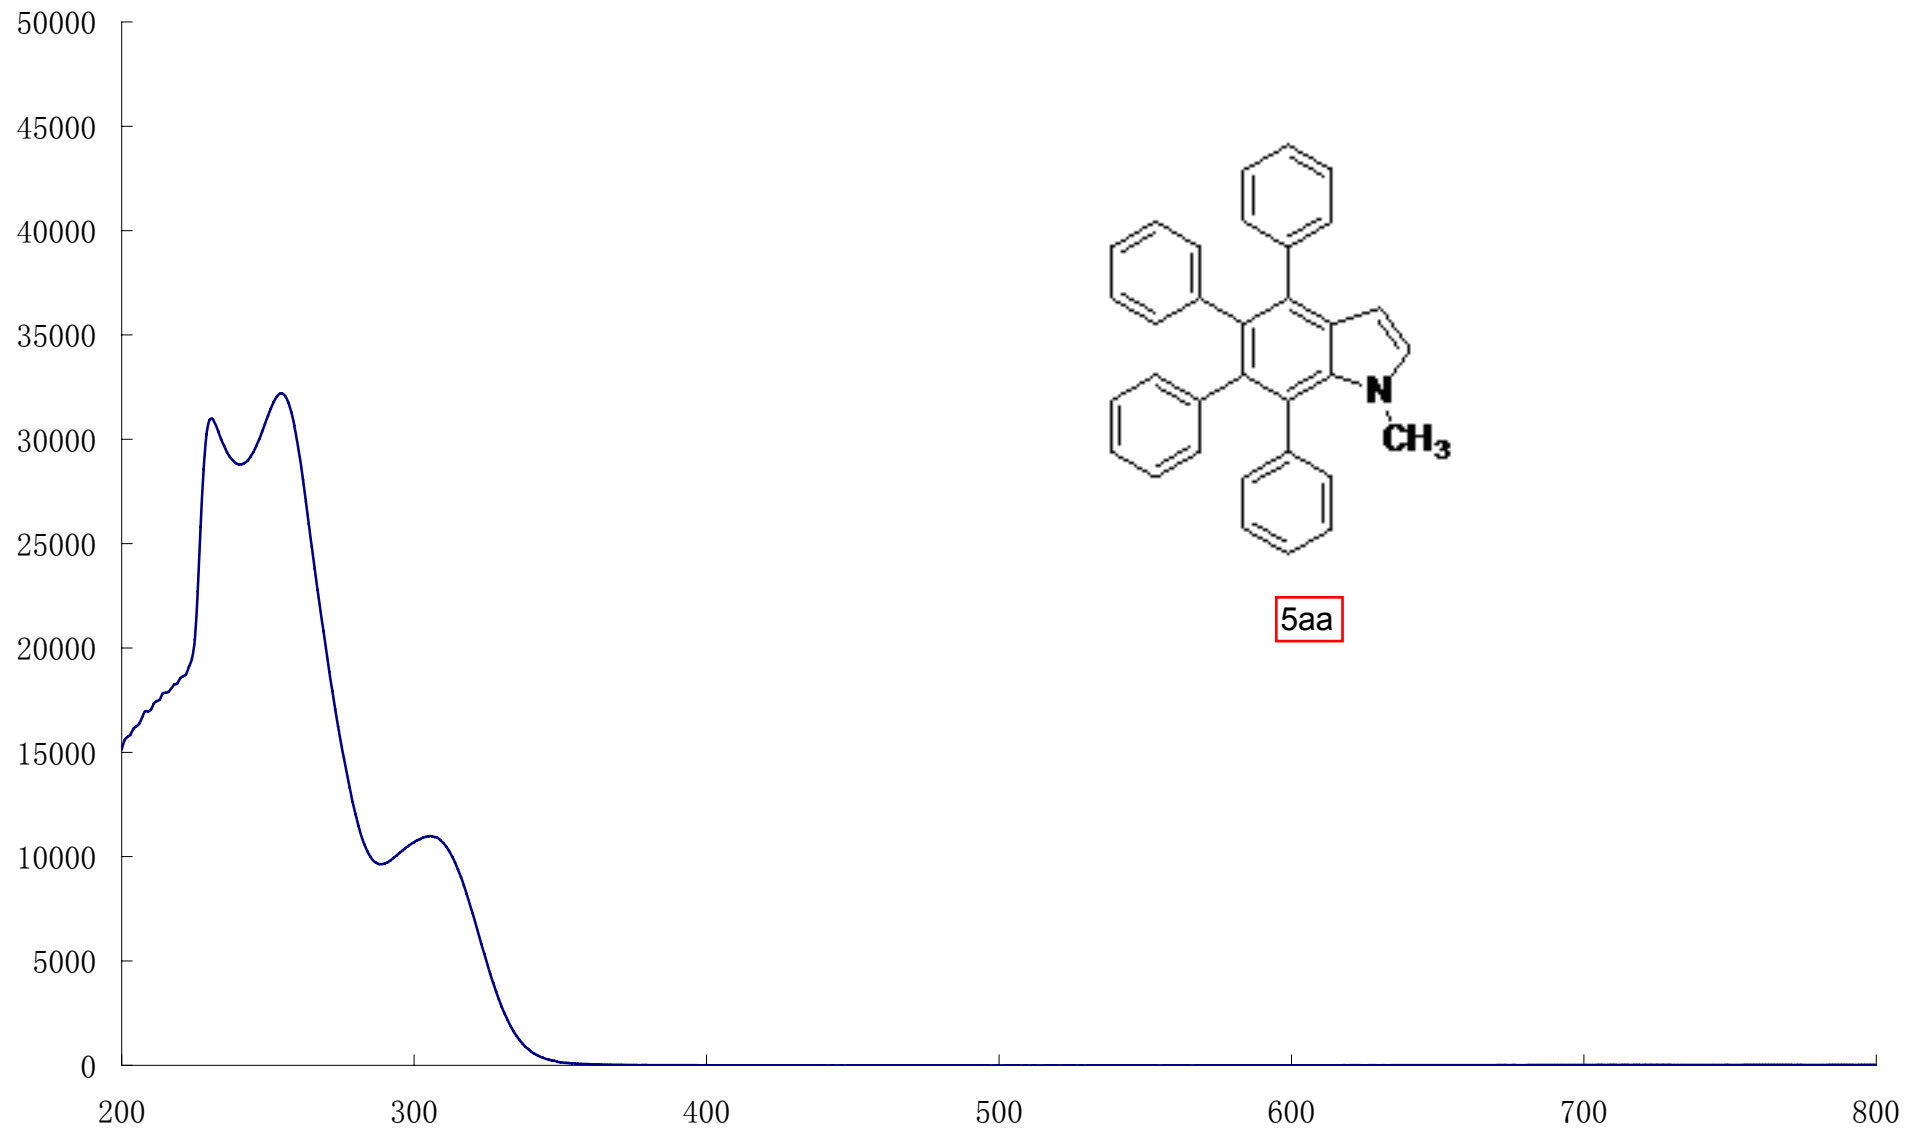

UV spectra of 5aa in DCM ([C]=5.0E-5 M).

Wavelength(nm)

Molar absorption  
coefficient(L/mol·  
cm)

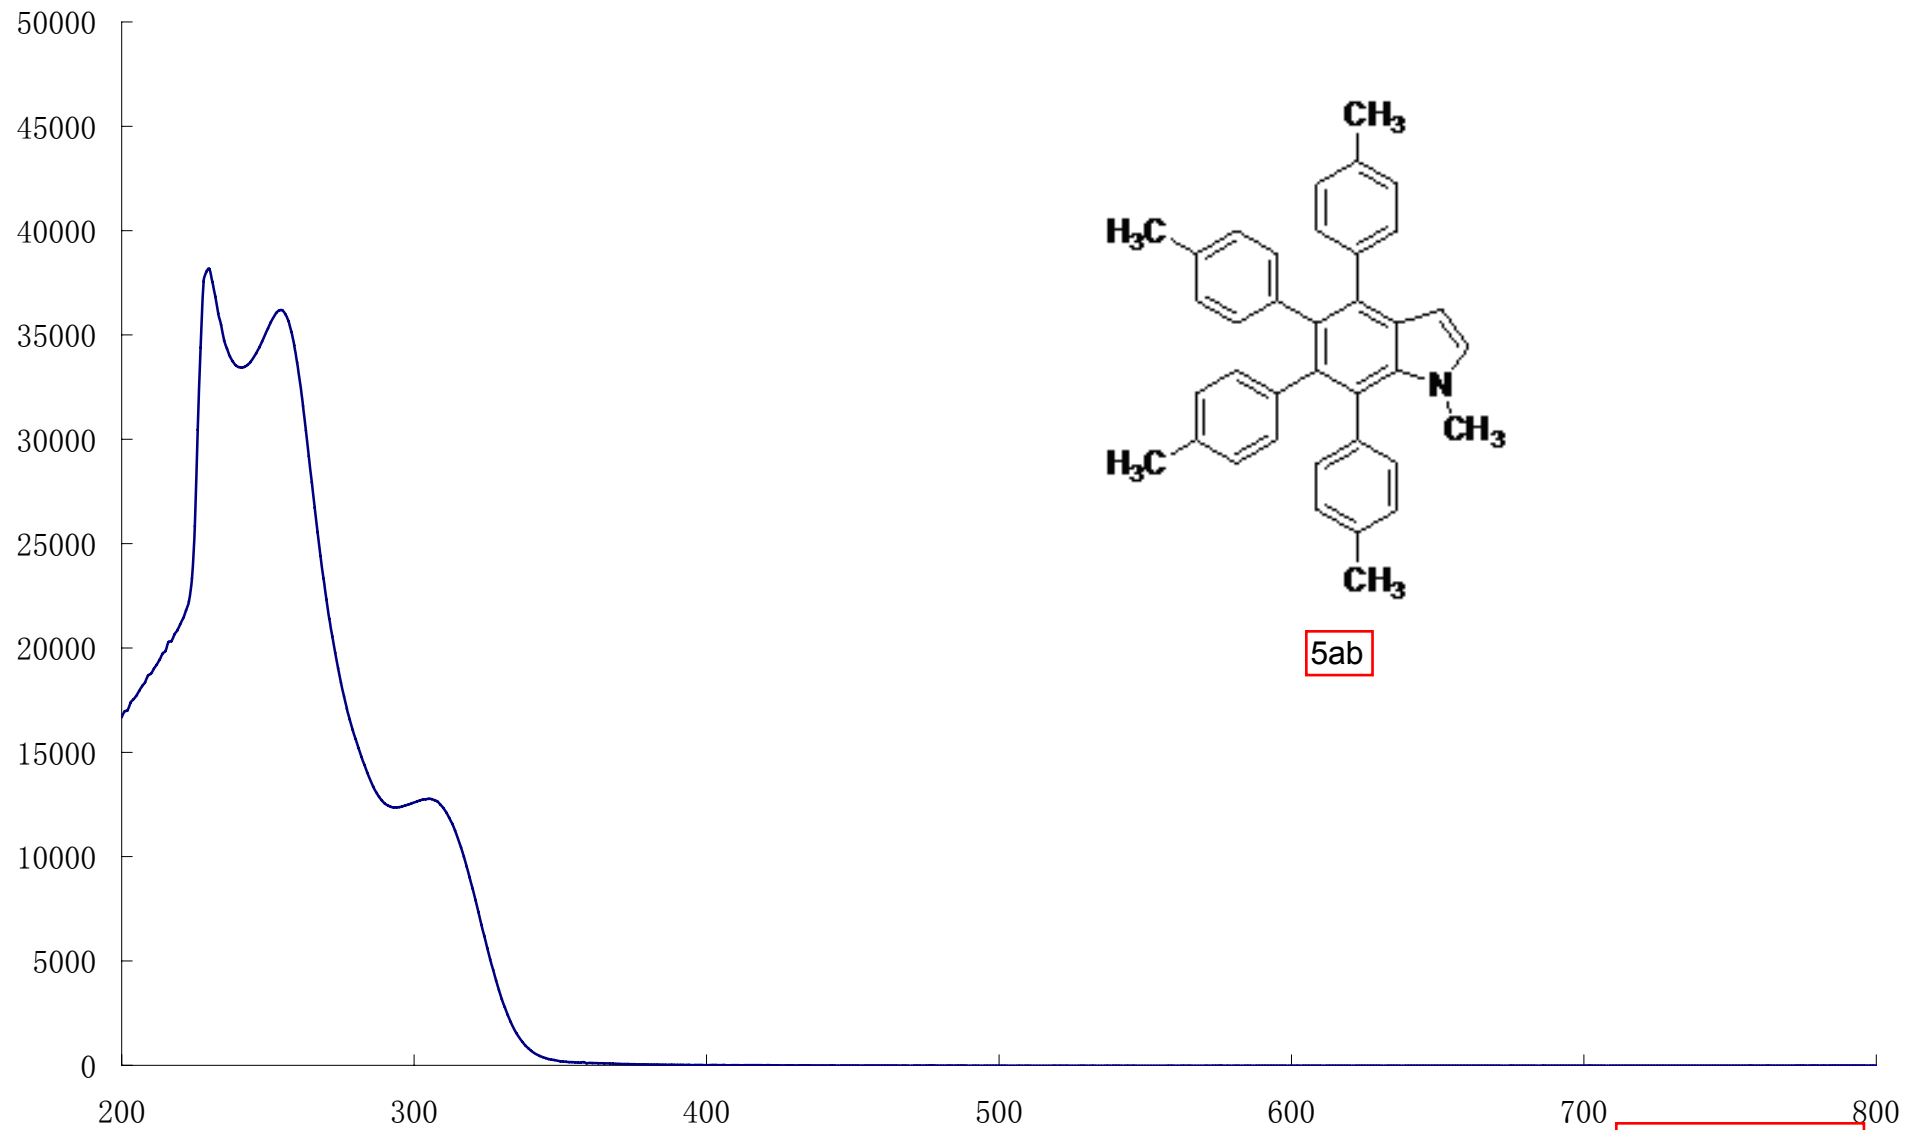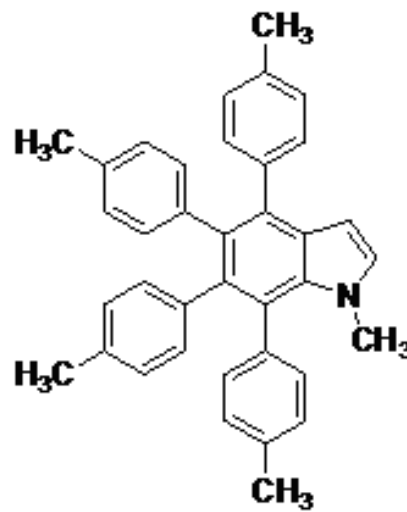

5ab

Molar absorption coefficient(L/mol•cm)

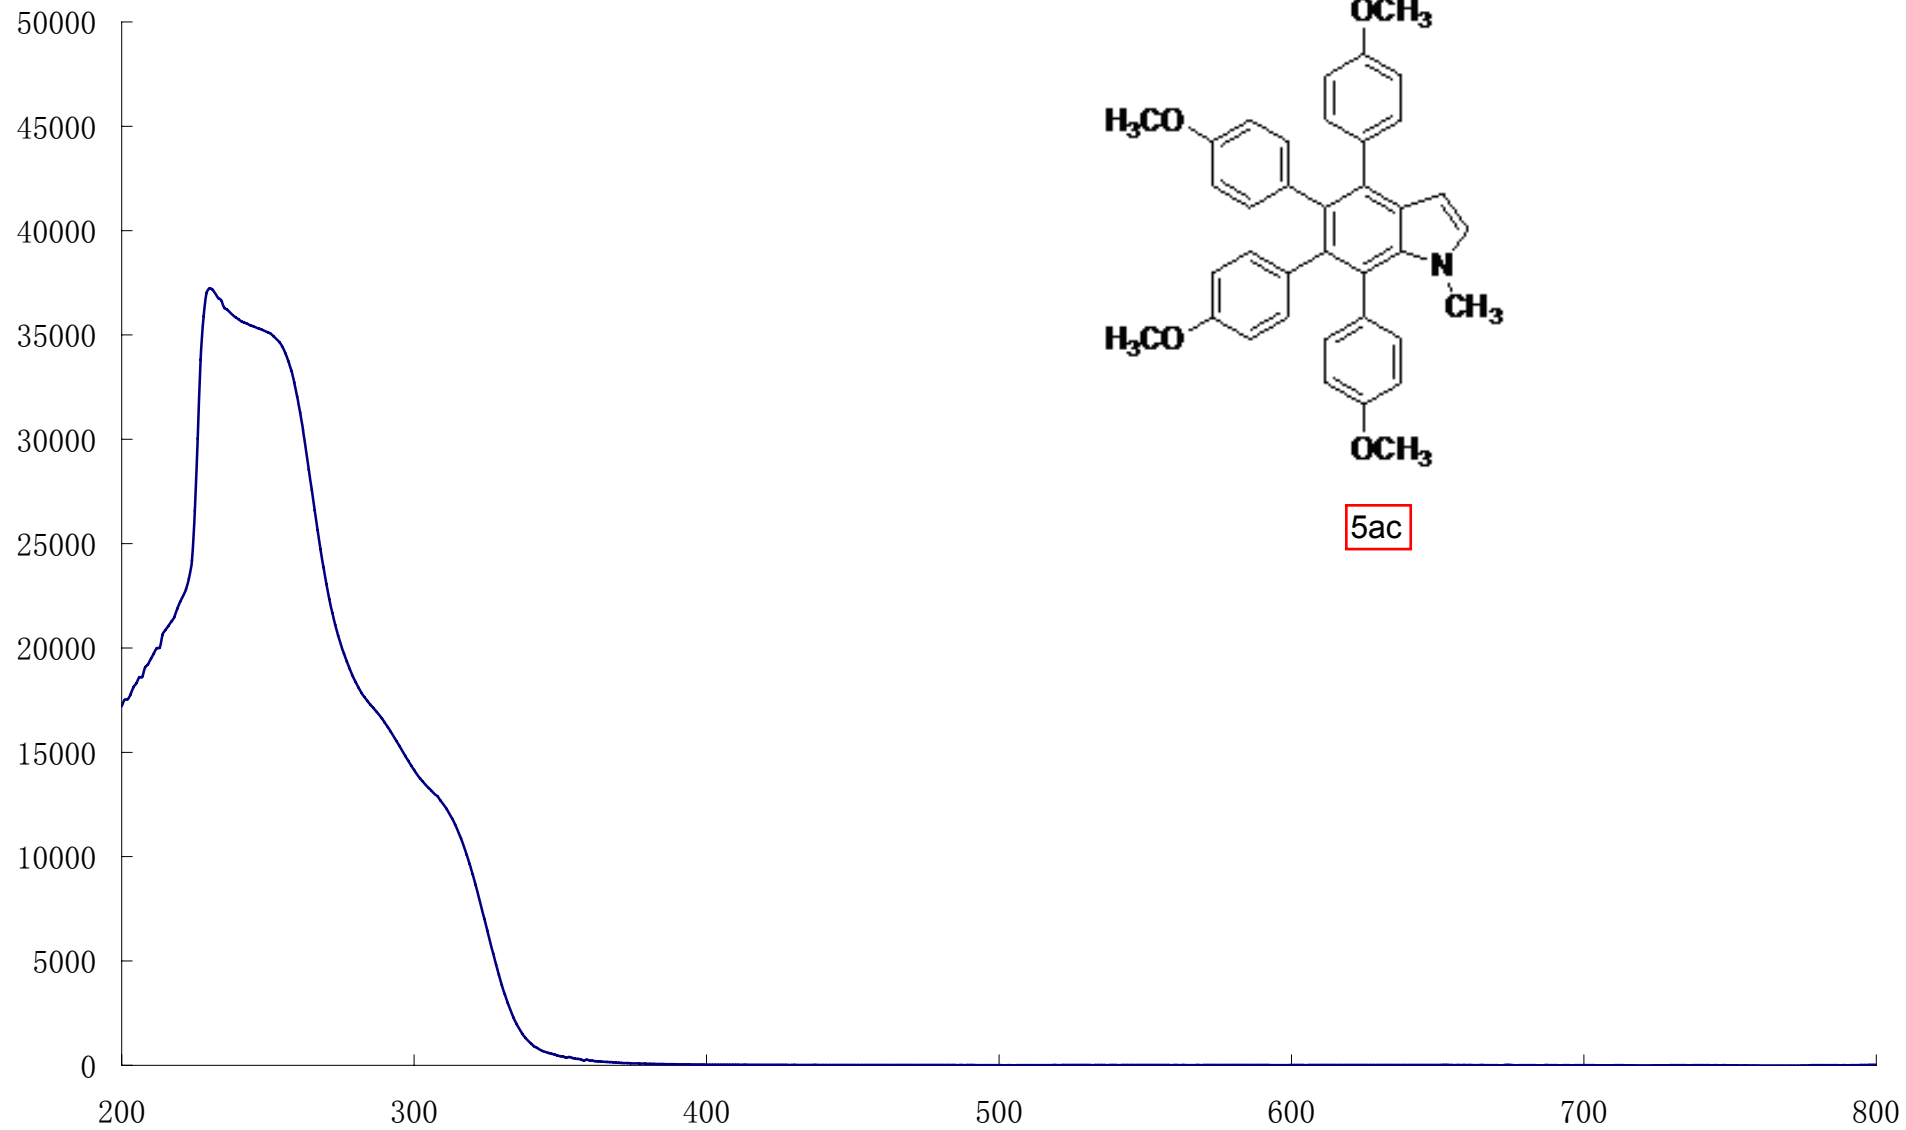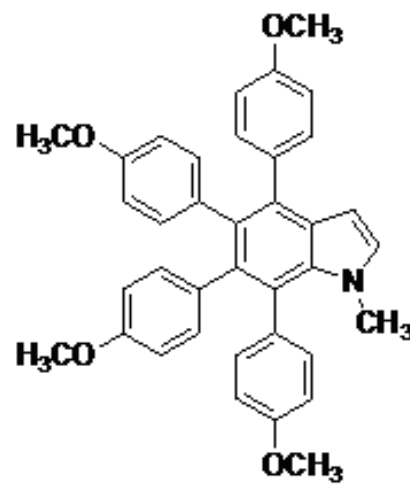

5ac

UV spectra of 5ac in DCM ([C]=5.0E-5 M).

Wavelength(nm)

Molar absorption  
coefficient(L/mol·  
cm)

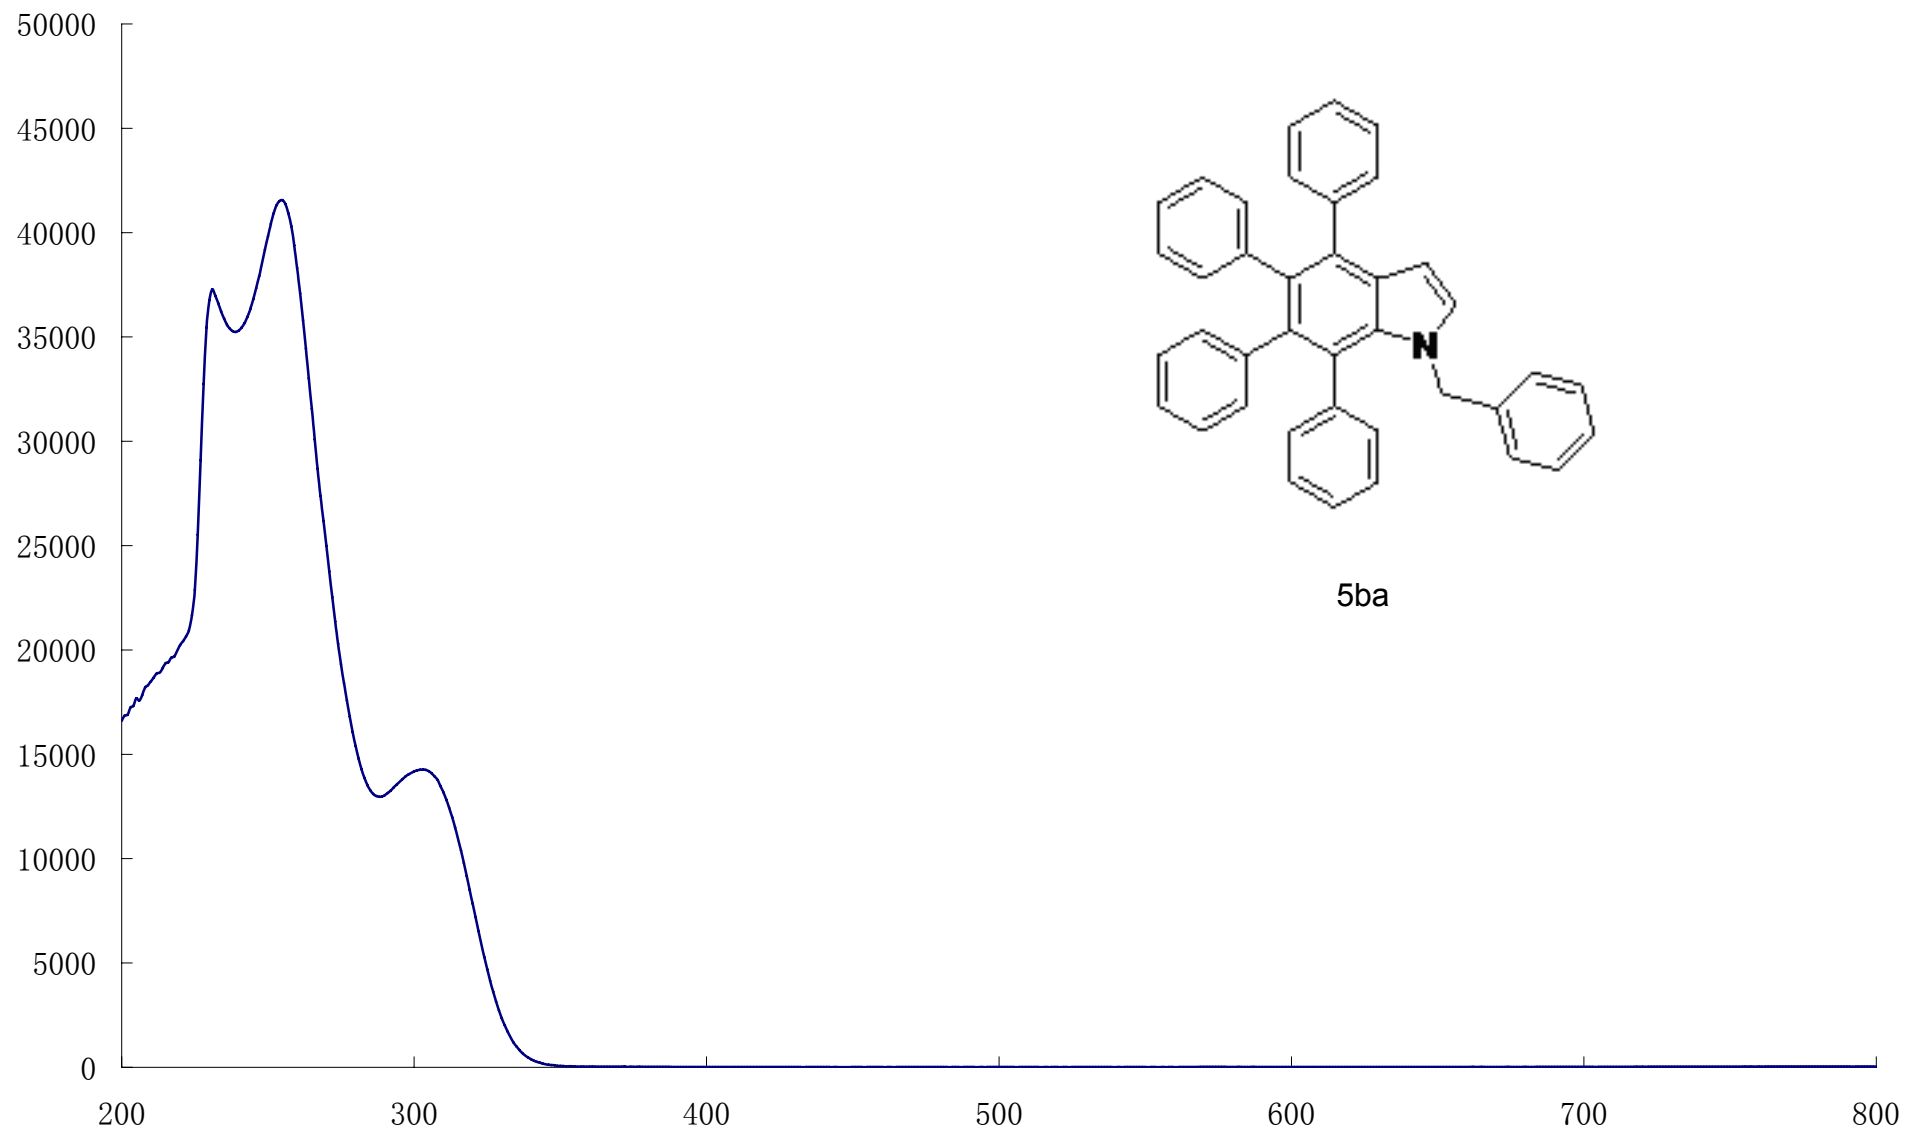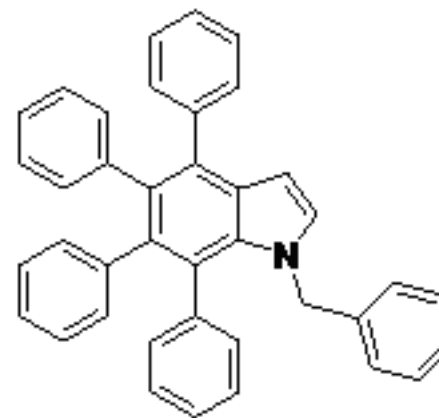

5ba
